# Supplementary material for: M1hot tumor-associated macrophages boost tissue-resident memory T cells infiltration and survival in human lung cancer
Source: PubMed Central journal article supplement (PMC7375465; doi:10.1136/jitc-2020-000778), 2020-07-21
Supplement: jitc-2020-000778supp001.pdf [file jitc-2020-000778supp001.pdf]

Figure S1.

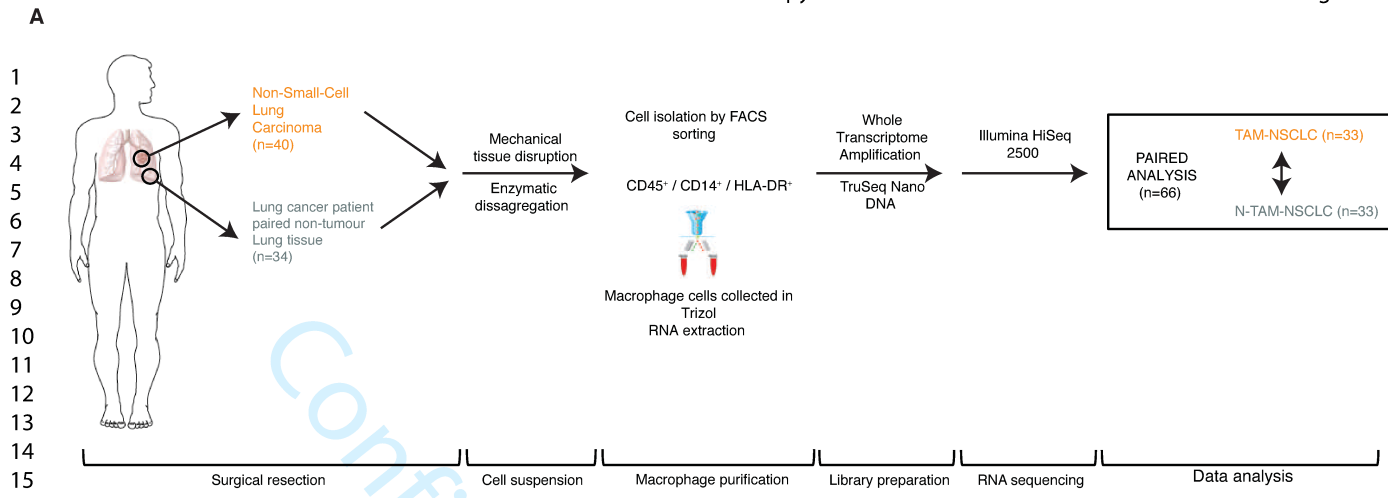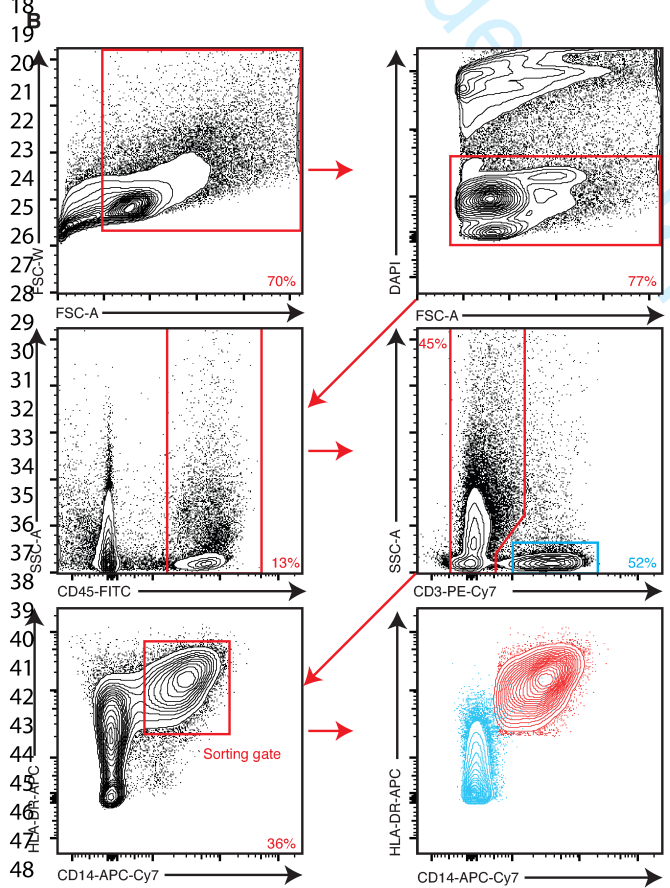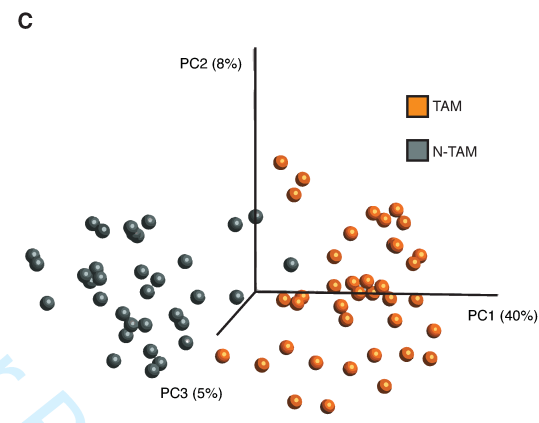

Figure S2.  
Page 53 of 259

Journal for ImmunoTherapy for Cancer

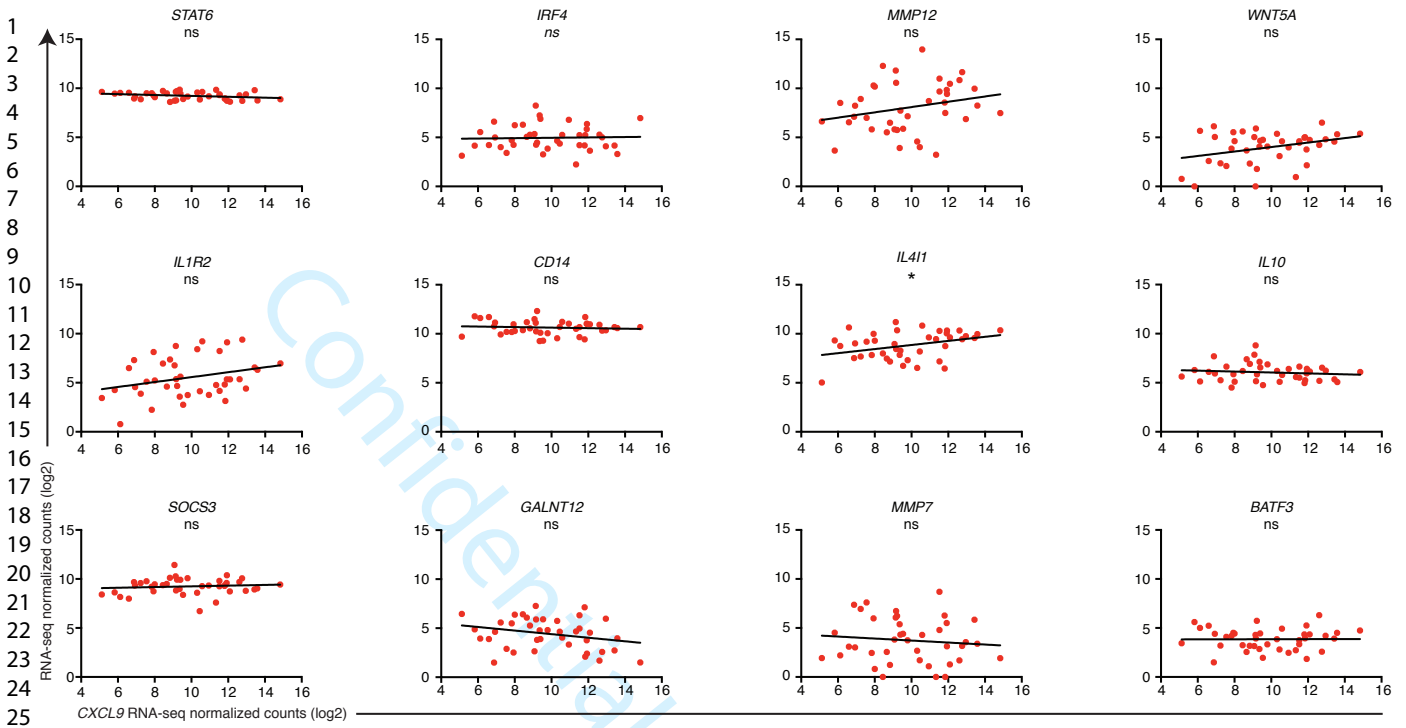

1  
2  
3  
4  
5  
6  
7  
8  
9  
10  
11  
12  
13  
14  
15  
16  
17  
18  
19  
20  
21  
22  
23  
24  
25  
26  
27  
28  
29  
30  
31  
32  
33  
34  
35  
36  
37  
38  
39  
40  
41  
42  
43  
44  
45  
46  
47  
48  
49  
50  
51  
52  
53  
54  
55  
56  
57  
58  
59  
60

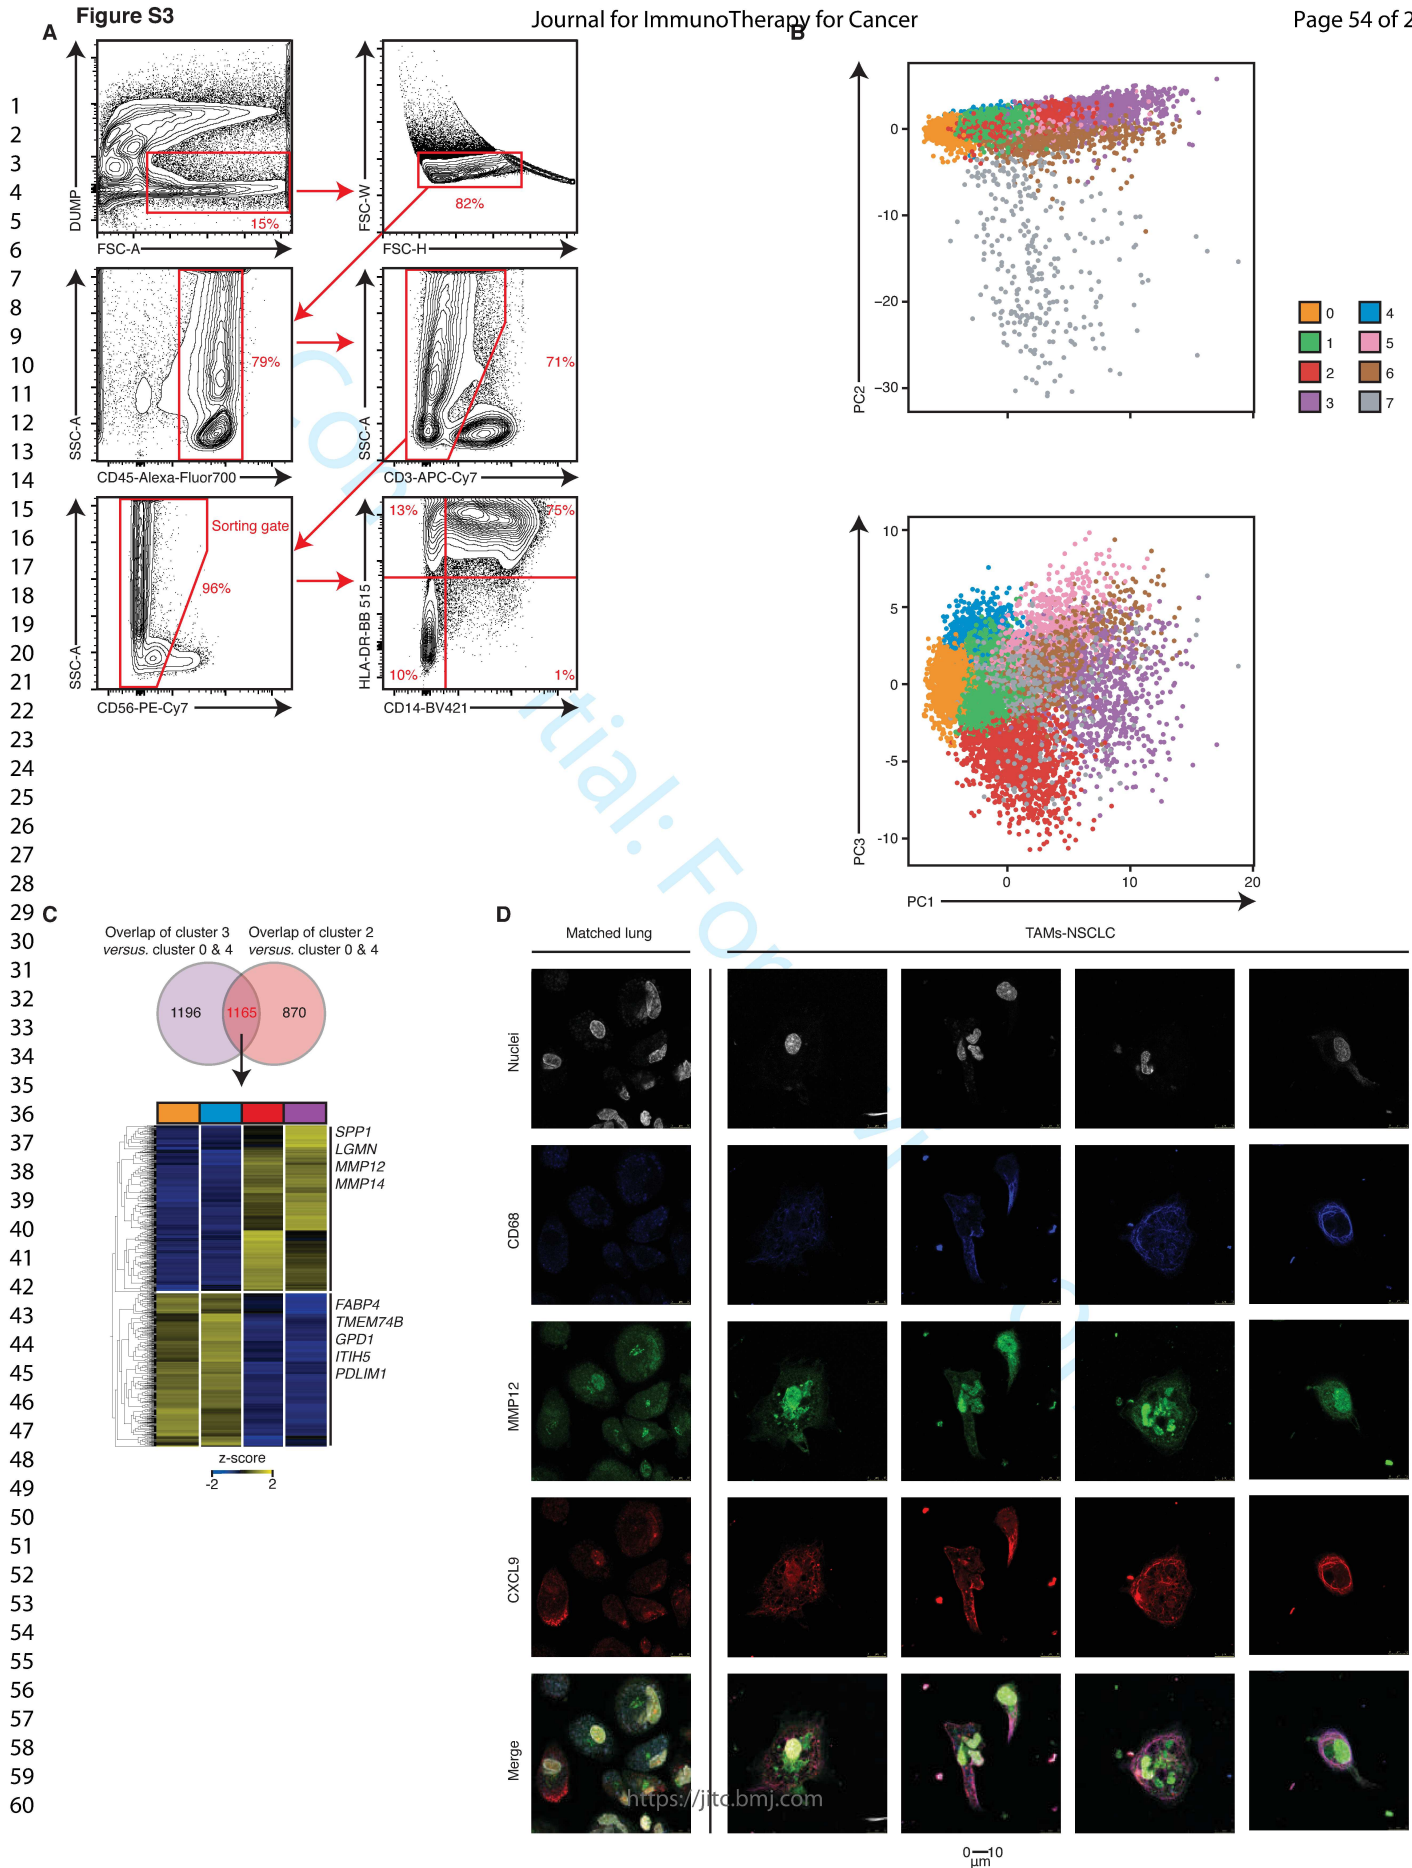

**Figure S4.**  
Page 55 of 259

Journal for ImmunoTherapy for Cancer

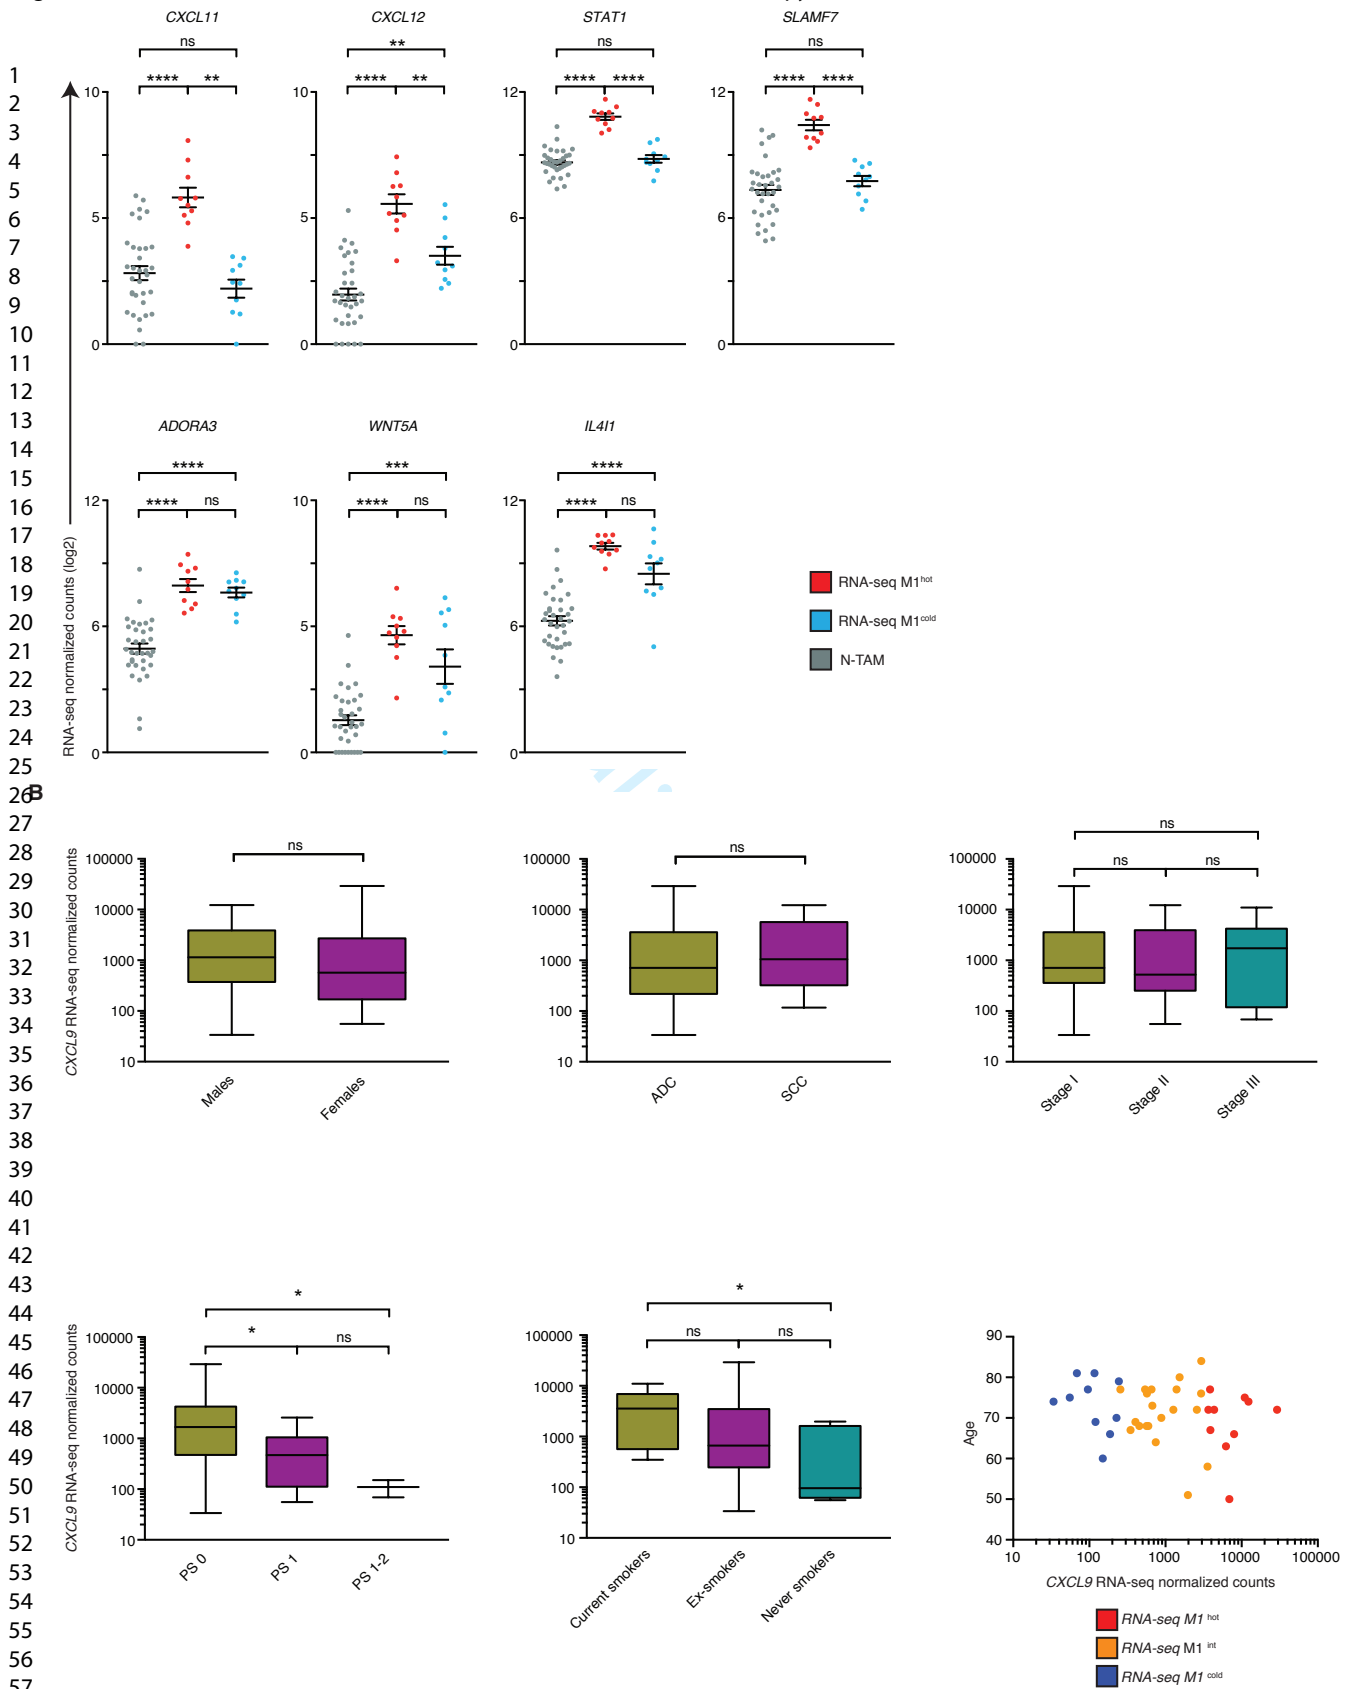

<https://jitc.bmj.com>

Figure S5.

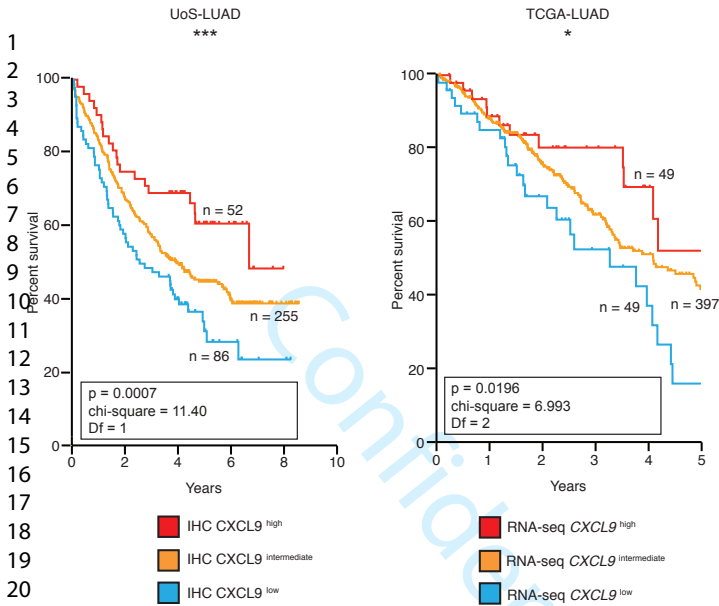

**Figure S6.**  
Page 57 of 259

Journal for ImmunoTherapy for Cancer

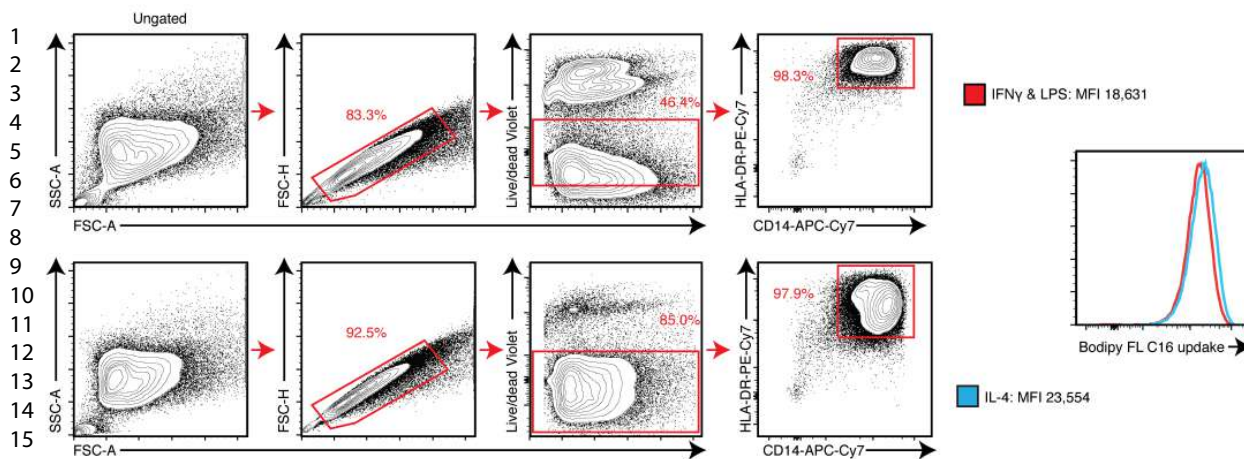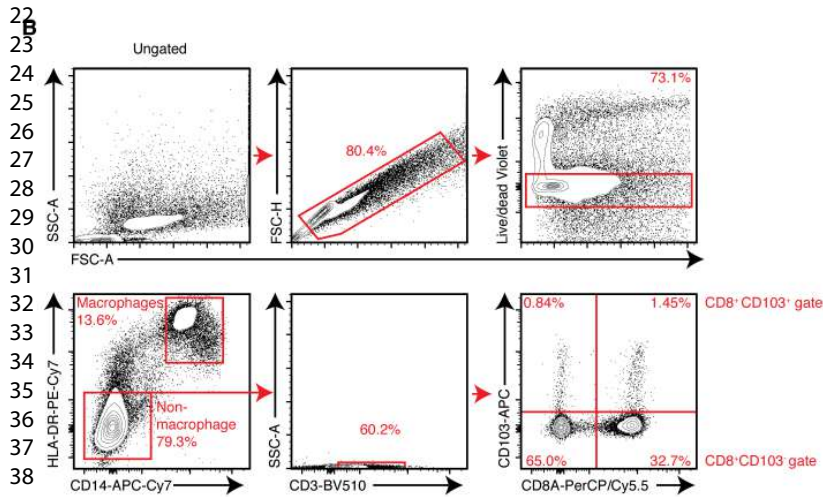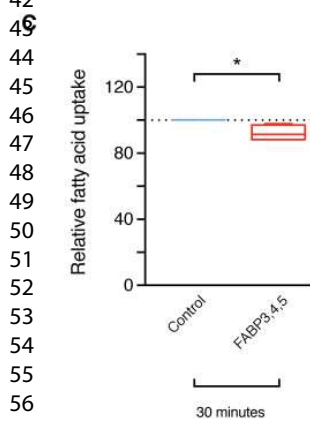

<https://jitc.bmj.com>

Demographics from whole cohort of NSCLC patients (n=41). From n=40 patients there was n=33 patients were used in the paired analysis TAMs/NTAMs (availability of tumour and r

| TargetLung ID | Used in paired analysis | Samples sequenced | Stage |
|---------------|-------------------------|-------------------|-------|
| 52            | No                      | only TAMs         | IIB   |
| 62            | Yes                     | TAMs and N-TAMs   | IIA   |
| 68            | Yes                     | TAMs and N-TAMs   | IA    |
| 70            | Yes                     | TAMs and N-TAMs   | IIA   |
| 71            | No                      | only TAMs         | IB    |
| 72            | No                      | only TAMs         | IA    |
| 74            | No                      | only TAMs         | IB    |
| 80            | Yes                     | TAMs and N-TAMs   | IB    |
| 81            | No                      | only TAMs         | IB    |
| 88            | Yes                     | TAMs and N-TAMs   | IA    |
| 91            | Yes                     | TAMs and N-TAMs   | IIIB  |
| 96            | Yes                     | TAMs and N-TAMs   | IIIA  |
| 97            | No                      | only TAMs         | IA    |
| 99            | Yes                     | TAMs and N-TAMs   | IIA   |
| 103           | Yes                     | TAMs and N-TAMs   | IIA   |
| 105           | Yes                     | TAMs and N-TAMs   | IA    |
| 113           | Yes                     | TAMs and N-TAMs   | IB    |
| 116           | No                      | only TAMs         | IV    |
| 117           | Yes                     | TAMs and N-TAMs   | IIIA  |
| 121           | Yes                     | TAMs and N-TAMs   | IIIA  |
| 132           | Yes                     | TAMs and N-TAMs   | IIIA  |
| 135           | Yes                     | TAMs and N-TAMs   | IIB   |
| 137           | Yes                     | TAMs and N-TAMs   | IIB   |
| 149           | Yes                     | TAMs and N-TAMs   | IB    |
| 150           | Yes                     | TAMs and N-TAMs   | IA    |
| 153           | Yes                     | TAMs and N-TAMs   | IIA   |
| 156           | Yes                     | TAMs and N-TAMs   | IB    |
| 159           | Yes                     | TAMs and N-TAMs   | IA    |
| 161           | Yes                     | TAMs and N-TAMs   | IB    |
| 163           | Yes                     | TAMs and N-TAMs   | IB    |
| 164           | Yes                     | TAMs and N-TAMs   | IA    |
| 167           | Yes                     | TAMs and N-TAMs   | IB    |
| 179           | Yes                     | TAMs and N-TAMs   | IIIA  |
| 186           | Yes                     | TAMs and N-TAMs   | IA    |
| 192           | Yes                     | TAMs and N-TAMs   | IIIA  |
| 196           | Yes                     | TAMs and N-TAMs   | IIB   |
| 198           | No                      | only N-TAMs       | IA    |
| 203           | Yes                     | TAMs and N-TAMs   | IB    |
| 210           | Yes                     | TAMs and N-TAMs   | IA    |



1  
2  
3  
4  
5  
6  
7  
8  
9  
10  
11  
12  
13  
14  
15  
16  
17  
18  
19  
20  
21  
22  
23  
24  
25  
26  
27  
28  
29  
30  
31  
32  
33  
34  
35  
36  
37  
38  
39  
40  
41  
42  
43  
44  
45  
46  
47  
48  
49  
50  
51  
52  
53  
54  
55  
56  
57  
58  
59  
60

|     |     |                 |     |
|-----|-----|-----------------|-----|
| 227 | Yes | TAMs and N-TAMs | IIB |
| 228 | Yes | TAMs and N-TAMs | IA  |

WBC = White Blood Cell count

Preprint: For Review Only



1  
2  
3  
4 **s tumour tissue available, from n=34 there was normal tissue available.**  
5 **matched tumour-free lung tissue)**  
6

| LUAD/LUSC | T status | N status | M status | Age | Gender |
|-----------|----------|----------|----------|-----|--------|
| LUAD      | 3        | 0        | 0        | 75  | F      |
| LUAD      | 2b       | 0        | 0        | 72  | F      |
| LUAD      | 1a       | 0        | 0        | 66  | M      |
| LUAD      | 1b       | 1        | 0        | 84  | F      |
| LUAD      | 2a       | 0        | 0        | 72  | F      |
| LUAD      | 1b       | 0        | 0        | 72  | M      |
| LUAD      | 2a       | 0        | 0        | 77  | F      |
| LUAD      | 2a       | 0        | 0        | 77  | F      |
| LUSC      | 2a       | 0        | 0        | 67  | M      |
| LUSC      | 1a       | 0        | 0        | 81  | M      |
| LUAD      | 4        | 2        | 0        | 81  | F      |
| LUAD      | 4        | 0        | 0        | 72  | F      |
| LUSC      | 1b       | 0        | 0        | 68  | M      |
| LUSC      | 2b       | 0        | 0        | 68  | M      |
| LUAD      | 2a       | 1        | 0        | 68  | F      |
| LUAD      | 1b       | 0        | 0        | 69  | M      |
| LUAD      | 2a       | 0        | 0        | 63  | M      |
| LUAD      | 1a       | 0        | 1B       | 72  | M      |
| LUSC      | 3        | 1        | 0        | 75  | M      |
| LUAD      | 2b       | 2        | 0        | 66  | M      |
| LUAD      | 2b       | 2        | 0        | 77  | F      |
| LUSC      | 3        | 0        | 0        | 67  | M      |
| LUSC      | 3        | 0        | 0        | 79  | M      |
| LUSC      | 2a       | 0        | 0        | 80  | M      |
| LUAD      | 1a       | 0        | 0        | 58  | F      |
| LUAD      | 2a       | 1        | 0        | 77  | F      |
| LUAD      | 2a       | 0        | 0        | 51  | F      |
| LUAD      | 1b       | 0        | 0        | 70  | F      |
| LUAD      | 2a       | 0        | 0        | 73  | M      |
| LUAD      | 2a       | 0        | 0        | 69  | F      |
| LUAD      | 1a       | 0        | 0        | 77  | M      |
| LUAD      | 2a       | 0        | 0        | 76  | M      |
| LUAD      | 3        | 2        | 0        | 70  | M      |
| LUSC      | 1b       | 0        | 0        | 76  | M      |
| LUAD      | 2b       | 2        | 0        | 77  | M      |
| LUAD      | 2b       | 0        | 0        | 50  | M      |
| LUAD      | 1a       | 0        | 0        | 87  | M      |
| LUAD      | 2a       | 0        | 0        | 64  | M      |
| LUAD      | 1a       | 0        | 0        | 74  | M      |

7  
8  
9  
10  
11  
12  
13  
14  
15  
16  
17  
18  
19  
20  
21  
22  
23  
24  
25  
26  
27  
28  
29  
30  
31  
32  
33  
34  
35  
36  
37  
38  
39  
40  
41  
42  
43  
44  
45  
46  
47  
48  
49  
50  
51  
52  
53  
54  
55  
56  
57  
58  
59  
60

<https://jitc.bmj.com>

1  
2  
3  
4  
5  
6  
7  
8  
9  
10  
11  
12  
13  
14  
15  
16  
17  
18  
19  
20  
21  
22  
23  
24  
25  
26  
27  
28  
29  
30  
31  
32  
33  
34  
35  
36  
37  
38  
39  
40  
41  
42  
43  
44  
45  
46  
47  
48  
49  
50  
51  
52  
53  
54  
55  
56  
57  
58  
59  
60

|      |    |   |   |    |   |
|------|----|---|---|----|---|
| LUSC | 2b | 1 | 0 | 74 | M |
| LUAD | 1b | 0 | 0 | 60 | F |

Preprint: For Review Only

1  
2  
3  
4  
5  
6  
7  
8  
9  
10  
11  
12  
13  
14  
15  
16  
17  
18  
19  
20  
21  
22  
23  
24  
25  
26  
27  
28  
29  
30  
31  
32  
33  
34  
35  
36  
37  
38  
39  
40  
41  
42  
43  
44  
45  
46  
47  
48  
49  
50  
51  
52  
53  
54  
55  
56  
57  
58  
59  
60

| Performance status | Smoking status | Pack-year | Asbestos exposure |
|--------------------|----------------|-----------|-------------------|
| 1                  | Never-smoker   | 0         | No                |
| 0                  | Never-smoker   | 0         | No                |
| 0                  | Ex-smoker      | N/A       | No                |
| 0                  | Ex-smoker      | N/A       | No                |
| 0                  | Ex-smoker      | 30        | No                |
| 0                  | Ex-smoker      | 50        | No                |
| 1                  | Ex-smoker      | 60        | No                |
| 0                  | Ex-smoker      | 15        | No                |
| 0                  | Ex-smoker      | 30        | Yes               |
| 1                  | Ex-smoker      | 90        | Yes               |
| 1-2                | Never-smoker   | 0         | No                |
| 0                  | Current-smoker | 25        | No                |
| 0                  | Current-smoker | 12        | No                |
| 0                  | Ex-smoker      | 63.75     | No                |
| 1                  | Ex-smoker      | 50        | No                |
| 0                  | Ex-smoker      | 5         | No                |
| 0                  | Ex-smoker      | 63        | No                |
| 1                  | Ex-smoker      | 30        | No                |
| 0                  | Current-smoker | 40        | Yes               |
| 0                  | Ex-smoker      | 29        | Yes               |
| 1                  | Never-smoker   | 0         | No                |
| 1                  | Current-smoker | 30.1      | Yes               |
| 0                  | Ex-smoker      | 25        | No                |
| 1                  | Ex-smoker      | 30        | No                |
| 0                  | Current-smoker | 40        | No                |
| 0                  | Ex-smoker      | 8         | No                |
| 0                  | Never-smoker   | 0         | No                |
| 1                  | Ex-smoker      | 10        | No                |
| 0                  | Ex-smoker      | 55        | No                |
| 0                  | Ex-smoker      | 15        | No                |
| 0                  | Ex-smoker      | 7.5       | No                |
| 0                  | Ex-smoker      | 25        | No                |
| 1                  | Ex-smoker      | 50        | Yes               |
| 0                  | Current-smoker | 60        | No                |
| 0                  | Ex-smoker      | 55        | Yes               |
| 0                  | Current-smoker | 25        | No                |
| 0                  | Ex-smoker      | N/A       | No                |
| 0                  | Ex-smoker      | 70        | Yes               |
| 0                  | Ex-smoker      | 40        | Yes               |

<https://jitc.bmj.com>

1  
2  
3  
4  
5  
6  
7  
8  
9  
10  
11  
12  
13  
14  
15  
16  
17  
18  
19  
20  
21  
22  
23  
24  
25  
26  
27  
28  
29  
30  
31  
32  
33  
34  
35  
36  
37  
38  
39  
40  
41  
42  
43  
44  
45  
46  
47  
48  
49  
50  
51  
52  
53  
54  
55  
56  
57  
58  
59  
60

|     |           |    |    |
|-----|-----------|----|----|
| 0   | Ex-smoker | 50 | No |
| 1-2 | Ex-smoker | 25 | No |

Preprint: For Review Only

1  
2  
3  
4  
5  
6  
7  
8  
9  
10  
11  
12  
13  
14  
15  
16  
17  
18  
19  
20  
21  
22  
23  
24  
25  
26  
27  
28  
29  
30  
31  
32  
33  
34  
35  
36  
37  
38  
39  
40  
41  
42  
43  
44  
45  
46  
47  
48  
49  
50  
51  
52  
53  
54  
55  
56  
57  
58  
59  
60

| Hb (g/L) | WBC (*E09/L) | Neutrophils (*E09/L) |
|----------|--------------|----------------------|
| 121      | 10.4         | 7.3                  |
| 124      | 10.1         | 6.7                  |
| 158      | 9.2          | 7                    |
| 145      | 8.2          | 5.1                  |
| 101      | 12           | 9.9                  |
| 100      | 10.1         | 8.1                  |
| 135      | 14.7         | 10.5                 |
| 130      | 7.8          | 4.2                  |
| 139      | 9.8          | 6.8                  |
| 133      | 5.9          | 3.8                  |
| 121      | 5.5          | 3.1                  |
| 161      | 12.8         | 8.7                  |
| 162      | 10.1         | 6                    |
| 107      | 22.5         | 17.5                 |
| 127      | 8.9          | 6.6                  |
| 136      | 8.8          | 6.9                  |
| 140      | 9.1          | 5.4                  |
| 158      | 5.3          | 3                    |
| 95       | 12.2         | 9.7                  |
| 141      | 10.7         | 7.5                  |
| 148      | 6.4          | 4.2                  |
| 142      | 6.4          | 3.6                  |
| 148      | 16.8         | 10.6                 |
| 125      | 19.5         | 16.2                 |
| 145      | 69           | 3.6                  |
| 128      | 6.4          | 3.4                  |
| 135      | 5.4          | 3.1                  |
| 128      | 5.4          | 2.5                  |
| 123      | 139          | 11.2                 |
| 126      | 3.8          | 2                    |
| 135      | 6.4          | 3.8                  |
| 86       | 11.3         | 9.9                  |
| 95       | 10.5         | 8.5                  |
| 125      | 9.6          | 5.7                  |
| 130      | 6.5          | 4.8                  |
| 134      | 10.8         | 5.9                  |
| 130      | 9            | 6.4                  |
| 131      | 7.7          | 5.3                  |
| 129      | 10.1         | 5.5                  |

<https://jitc.bmj.com>

1  
2  
3  
4  
5  
6  
7  
8  
9  
10  
11  
12  
13  
14  
15  
16  
17  
18  
19  
20  
21  
22  
23  
24  
25  
26  
27  
28  
29  
30  
31  
32  
33  
34  
35  
36  
37  
38  
39  
40  
41  
42  
43  
44  
45  
46  
47  
48  
49  
50  
51  
52  
53  
54  
55  
56  
57  
58  
59  
60

|     |      |     |
|-----|------|-----|
| 140 | 11.1 | 6.2 |
| 133 | 11.5 | 7.7 |

Preprint: For Review Only

1  
2  
3  
4  
5  
6  
7  
8  
9  
10  
11  
12  
13  
14  
15  
16  
17  
18  
19  
20  
21  
22  
23  
24  
25  
26  
27  
28  
29  
30  
31  
32  
33  
34  
35  
36  
37  
38  
39  
40  
41  
42  
43  
44  
45  
46  
47  
48  
49  
50  
51  
52  
53  
54  
55  
56  
57  
58  
59  
60

| Lymphocytes (*E09/L) | Platelets (*E09/L) | Albumin (g/L) | ALK mut  |
|----------------------|--------------------|---------------|----------|
| 2.2                  | 430                | 37            | NEG      |
| 2.7                  | 338                | 36            | NEG      |
| 1.4                  | 247                | 42            | NEG      |
| 2.2                  | 223                | 37            | NEG      |
| 1.3                  | 350                | 27            | NEG      |
| 0.7                  | 434                | 20            | NEG      |
| 3                    | 402                | 35            | NEG      |
| 2.6                  | 75                 | 40            | NEG      |
| 2                    | 287                | 5             | NEG      |
| 1.3                  | 342                | 43            | Not done |
| 1.8                  | 272                | 37            | NEG      |
| 2.1                  | 205                | 37            | NEG      |
| 3.2                  | 256                | 46            | NEG      |
| 1.9                  | 405                | 23            | NEG      |
| 1.6                  | 246                | 46            | NEG      |
| 1.2                  | 265                | 41            | Not done |
| 2.5                  | 288                | Not recorded  | NEG      |
| 1                    | 229                | 39            | NEG      |
| 1.4                  | 24                 | 29            | NEG      |
| 2.2                  | 332                | 39            | NEG      |
| 1.4                  | 261                | 38            | NEG      |
| 1.7                  | 261                | 38            | NEG      |
| 4.3                  | 245                | 39            | NEG      |
| 2.3                  | 32                 | 457           | NEG      |
| 2.6                  | 257                | 40            | NEG      |
| 2.3                  | 261                | 40            | NEG      |
| 1.7                  | 334                | 37            | NEG      |
| 2.1                  | 117                | Not recorded  | NEG      |
| 1.7                  | 323                | 46            | NEG      |
| 1.3                  | 240                | 31            | NEG      |
| 1.9                  | 247                | 25            | NEG      |
| 1                    | 156                | 25            | NEG      |
| 0.9                  | 471                | 18            | NEG      |
| 3                    | 307                | 43            | NEG      |
| 1.3                  | 192                | 31            | NEG      |
| 3.9                  | 400                | 35            | NEG      |
| 1.6                  | 231                | Not recorded  | NEG      |
| 1.5                  | 274                | 25            | NEG      |
| 3.8                  | 313                | 43            | Not done |



1  
2  
3  
4  
5  
6  
7  
8  
9  
10  
11  
12  
13  
14  
15  
16  
17  
18  
19  
20  
21  
22  
23  
24  
25  
26  
27  
28  
29  
30  
31  
32  
33  
34  
35  
36  
37  
38  
39  
40  
41  
42  
43  
44  
45  
46  
47  
48  
49  
50  
51  
52  
53  
54  
55  
56  
57  
58  
59  
60

|     |     |    |     |
|-----|-----|----|-----|
| 3.1 | 302 | 32 | NEG |
| 2.7 | 344 | 40 | NEG |

Preprint: For Review Only

1  
2  
3  
4  
5  
6  
7  
8  
9  
10  
11  
12  
13  
14  
15  
16  
17  
18  
19  
20  
21  
22  
23  
24  
25  
26  
27  
28  
29  
30  
31  
32  
33  
34  
35  
36  
37  
38  
39  
40  
41  
42  
43  
44  
45  
46  
47  
48  
49  
50  
51  
52  
53  
54  
55  
56  
57  
58  
59  
60

| EGFR mut | Mutation description    | CD8+/field                                  |
|----------|-------------------------|---------------------------------------------|
| NEG      |                         | 6.26                                        |
| NEG      |                         | 28.07                                       |
| NEG      |                         | 10.11                                       |
| NEG      |                         | 11.44                                       |
| NEG      |                         | 38.70                                       |
| NEG      |                         | 15.56                                       |
| YES      | EGFR1 c2573 p.Leu858Arg | 10.81                                       |
| NEG      |                         | 1.93                                        |
| NEG      |                         | 14.70                                       |
| Not done |                         | 0.67                                        |
| NEG      |                         | 4.26                                        |
| NEG      |                         | 9.85                                        |
| NEG      |                         | 2.67                                        |
| NEG      |                         | 17.52                                       |
| NEG      |                         | 9.19                                        |
| POS      | EGFR1 deletion exon 19  | 2.81                                        |
| NEG      |                         | 21.22                                       |
| NEG      |                         | 10.29                                       |
| NEG      |                         | 9.74                                        |
| NEG      |                         | 9.56                                        |
| YES      | EGFR1 deletion exon 19  | 4.81                                        |
| NEG      |                         | 4.41                                        |
| NEG      |                         | 0.30                                        |
| NEG      |                         | 14                                          |
| NEG      |                         | 29.11                                       |
| YES      | EGFR1 deletion exon 19  | 6.33                                        |
| YES      | EGFR1 deletion exon 19  | 9.59                                        |
| NEG      |                         | 12.56                                       |
| NEG      |                         | 3.70                                        |
| NEG      |                         | 6.78                                        |
| NEG      |                         | 15.78                                       |
| NEG      |                         | 6.44                                        |
| NEG      |                         | 4.11                                        |
| NEG      |                         | 2.70                                        |
| NEG      |                         | 29.78                                       |
| NEG      |                         | 7.11                                        |
| NEG      |                         | Not applicable (no tumour tissue available) |
| NEG      |                         | 5.00                                        |
| Not done |                         | 5.04                                        |

<https://jitc.bmj.com>

1  
2  
3  
4  
5  
6  
7  
8  
9  
10  
11  
12  
13  
14  
15  
16  
17  
18  
19  
20  
21  
22  
23  
24  
25  
26  
27  
28  
29  
30  
31  
32  
33  
34  
35  
36  
37  
38  
39  
40  
41  
42  
43  
44  
45  
46  
47  
48  
49  
50  
51  
52  
53  
54  
55  
56  
57  
58  
59  
60

|     |  |       |
|-----|--|-------|
| NEG |  | 10.74 |
| NEG |  | 8.59  |

Preprint: For Review Only

1  
2  
3  
4  
5  
6  
7  
8  
9  
10  
11  
12  
13  
14  
15  
16  
17  
18  
19  
20  
21  
22  
23  
24  
25  
26  
27  
28  
29  
30  
31  
32  
33  
34  
35  
36  
37  
38  
39  
40  
41  
42  
43  
44  
45  
46  
47  
48  
49  
50  
51  
52  
53  
54  
55  
56  
57  
58  
59  
60

| CD3+/field                                  | CD4+/field                                  |
|---------------------------------------------|---------------------------------------------|
| 25.26                                       | 13.56                                       |
| 60.08                                       | 23.67                                       |
| 39.63                                       | 18.67                                       |
| 44.42                                       | 22.5                                        |
| 48.15                                       | 7.33                                        |
| 39.93                                       | 15.44                                       |
| 33.81                                       | 18.44                                       |
| 32.30                                       | 17.56                                       |
| 30.00                                       | 6.78                                        |
| 3.67                                        | 2.33                                        |
| 17.15                                       | 7.78                                        |
| 27.77                                       | 30.89                                       |
| 6.93                                        | 5                                           |
| 32.78                                       | 14.89                                       |
| 43.15                                       | 21.67                                       |
| 13.59                                       | 15.11                                       |
| 49.93                                       | 31.22                                       |
| 33.52                                       | 31.33                                       |
| 17.11                                       | 19.78                                       |
| 23.44                                       | 9.33                                        |
| 14.67                                       | 14.89                                       |
| 13.59                                       | 3.44                                        |
| 0.92                                        | 2.89                                        |
| 33                                          | 35.22                                       |
| 50.73                                       | 27.89                                       |
| 18.90                                       | 17.89                                       |
| 34.17                                       | 24.56                                       |
| 29.35                                       | 28.89                                       |
| 8.26                                        | 7.78                                        |
| 20.20                                       | 16.67                                       |
| 47.75                                       | 28.56                                       |
| 10.85                                       | 10.89                                       |
| 4.88                                        | 4.78                                        |
| 13.35                                       | 6.22                                        |
| 48.11                                       | 31.78                                       |
| 9.50                                        | 5.56                                        |
| Not applicable (no tumour tissue available) | Not applicable (no tumour tissue available) |
| 5.67                                        | 9.00                                        |
| 5.04                                        | 3.89                                        |

<https://jitc.bmj.com>

1  
2  
3  
4  
5  
6  
7  
8  
9  
10  
11  
12  
13  
14  
15  
16  
17  
18  
19  
20  
21  
22  
23  
24  
25  
26  
27  
28  
29  
30  
31  
32  
33  
34  
35  
36  
37  
38  
39  
40  
41  
42  
43  
44  
45  
46  
47  
48  
49  
50  
51  
52  
53  
54  
55  
56  
57  
58  
59  
60

|       |       |
|-------|-------|
| 11.27 | 11.56 |
| 11.74 | 9.67  |

Preprint: For Review Only

1  
2  
3  
4  
5  
6  
7  
8  
9  
10  
11  
12  
13  
14  
15  
16  
17  
18  
19  
20  
21  
22  
23  
24  
25  
26  
27  
28  
29  
30  
31  
32  
33  
34  
35  
36  
37  
38  
39  
40  
41  
42  
43  
44  
45  
46  
47  
48  
49  
50  
51  
52  
53  
54  
55  
56  
57  
58  
59  
60

| CD20+/field                                 | CD68+/field                                 |
|---------------------------------------------|---------------------------------------------|
| 4.22                                        | 7.56                                        |
| 18.11                                       | 9.67                                        |
| 3.56                                        | 8.22                                        |
| 3.67                                        | 17.83                                       |
| 6.11                                        | 20.33                                       |
| 0.22                                        | 18.33                                       |
| 8.00                                        | 5.11                                        |
| 10.33                                       | 11.56                                       |
| 0.33                                        | 10.11                                       |
| 2.89                                        | 2.44                                        |
| 0.33                                        | 7.00                                        |
| 4.44                                        | 16.00                                       |
| 0.33                                        | 7.89                                        |
| 7.89                                        | 9.56                                        |
| 3.33                                        | 12.89                                       |
| 1.56                                        | 8.00                                        |
| 11.22                                       | 14.67                                       |
| 6.22                                        | 3.44                                        |
| 0.31                                        | 22.44                                       |
| 8.89                                        | 7.89                                        |
| 0.11                                        | 5.33                                        |
| 1.09                                        | 6.78                                        |
| 0.11                                        | 3.89                                        |
| 2.22                                        | 18.11                                       |
| 50.09                                       | 6.67                                        |
| 8.56                                        | 3.22                                        |
| 15.09                                       | 2.67                                        |
| 2.02                                        | 16.11                                       |
| 10.27                                       | 9.33                                        |
| 1.09                                        | 8.78                                        |
| 6.69                                        | 10.33                                       |
| 1.09                                        | 7.11                                        |
| 0.47                                        | 3.00                                        |
| 2.49                                        | 6.11                                        |
| 16.44                                       | 30.56                                       |
| 2.02                                        | 11.89                                       |
| Not applicable (no tumour tissue available) | Not applicable (no tumour tissue available) |
| 0.22                                        | 8.00                                        |
| 0.47                                        | 1.44                                        |

<https://jitc.bmj.com>

1  
2  
3  
4  
5  
6  
7  
8  
9  
10  
11  
12  
13  
14  
15  
16  
17  
18  
19  
20  
21  
22  
23  
24  
25  
26  
27  
28  
29  
30  
31  
32  
33  
34  
35  
36  
37  
38  
39  
40  
41  
42  
43  
44  
45  
46  
47  
48  
49  
50  
51  
52  
53  
54  
55  
56  
57  
58  
59  
60

|       |      |
|-------|------|
| 18.82 | 7.89 |
| 7.31  | 6.00 |

Preprint: For Review Only



1  
2  
3  
4  
5  
6  
7  
8  
9  
10  
11  
12  
13  
14  
15  
16  
17  
18  
19  
20  
21  
22  
23  
24  
25  
26  
27  
28  
29  
30  
31  
32  
33  
34  
35  
36  
37  
38  
39  
40  
41  
42  
43  
44  
45  
46  
47  
48  
49  
50  
51  
52  
53  
54  
55  
56  
57  
58  
59  
60

Confidential: For Review Only

<https://jitc.bmj.com>

- 1
- 2
- 3
- 4
- 5
- 6
- 7
- 8
- 9
- 10
- 11
- 12
- 13
- 14
- 15
- 16
- 17
- 18
- 19
- 20
- 21
- 22
- 23
- 24
- 25
- 26
- 27
- 28
- 29
- 30
- 31
- 32
- 33
- 34
- 35
- 36
- 37
- 38
- 39
- 40
- 41
- 42
- 43
- 44
- 45
- 46
- 47
- 48
- 49
- 50
- 51
- 52
- 53
- 54
- 55
- 56
- 57
- 58
- 59
- 60

Confidential: For Review Only

|    |          |
|----|----------|
| 1  | Gene     |
| 2  | AATF     |
| 3  | ADAR     |
| 4  | ADAR     |
| 5  | AIM2     |
| 6  | AIM2     |
| 7  | ALPK1    |
| 8  | ANKRD22  |
| 9  | ANKRD22  |
| 10 | APOBEC3A |
| 11 | APOL2    |
| 12 | APOL3    |
| 13 | APOL3    |
| 14 | APOL6    |
| 15 | ARS2     |
| 16 | BATF2    |
| 17 | BATF2    |
| 18 | BTN3A1   |
| 19 | BTN3A2   |
| 20 | BTN3A3   |
| 21 | BTN3A3   |
| 22 | C6ORF106 |
| 23 | C9ORF109 |
| 24 | C9ORF109 |
| 25 | CCL15    |
| 26 | CCL20    |
| 27 | CCL5     |
| 28 | CCL5     |
| 29 | CD40     |
| 30 | CD69     |
| 31 | CD69     |
| 32 | CFB      |
| 33 | CLDN7    |
| 34 | CXCL10   |
| 35 | CXCL11   |
| 36 | CXCL12   |
| 37 | CXCL12   |
| 38 | CXCL9    |
| 39 | DCAF6    |
| 40 | DYNLT1   |
| 41 | ELF4     |
| 42 | ELF4     |
| 43 | ETV7     |
| 44 | FAM26F   |
| 45 | FAM26F   |
| 46 | GBP1     |
| 47 | GBP2     |
| 48 | GBP4     |
| 49 | GBP4     |
| 50 | GBP5     |
| 51 | HAPLN3   |
| 52 | HCG4     |
| 53 | HCP5     |
| 54 | HCP5     |
| 55 | HLA-A    |
| 56 | HLA-B    |
| 57 | HLA-C    |
| 58 | HLA-C    |
| 59 | HLA-E    |
| 60 | HLA-F    |
|    | HLA-G    |

Confidential: For Review Only

|    |           |
|----|-----------|
| 1  |           |
| 2  | HLA-H     |
| 3  | IL1F7     |
| 4  | IL11      |
| 5  | IL12A     |
| 6  | IL12B     |
| 7  | IL23A     |
| 8  | IL27      |
| 9  | IL6       |
| 10 | IRF1      |
| 11 | IRF5      |
| 12 | IRF7      |
| 13 | IRF9      |
| 14 | ITGAL     |
| 15 | JAK2      |
| 16 | KCNJ2     |
| 17 | LBA1      |
| 18 | LOC400759 |
| 19 | LRRCC1    |
| 20 | MDK       |
| 21 | MFAP1     |
| 22 | MIA3      |
| 23 | MOV10     |
| 24 | MR1       |
| 25 | NFIX      |
| 26 | NLRC5     |
| 27 | NMI       |
| 28 | NOS2      |
| 29 | NUP50     |
| 30 | OAT       |
| 31 | ORC3L     |
| 32 | OSCAR     |
| 33 | PARP14    |
| 34 | PAXIP1    |
| 35 | PLEKHA7   |
| 36 | PML       |
| 37 | PRPF3     |
| 38 | PSMB10    |
| 39 | PSMB8     |
| 40 | PSMB9     |
| 41 | RARRES3   |
| 42 | RBCK1     |
| 43 | SELT      |
| 44 | SERPING1  |
| 45 | SERPINI1  |
| 46 | SLAMF7    |
| 47 | SLC15A4   |

Confidential: For Review Only

|    |         |
|----|---------|
| 1  |         |
| 2  | SLC6A12 |
| 3  | SP100   |
| 4  | SP140   |
| 5  | STAT1   |
| 6  | STAT2   |
| 7  | TAP1    |
| 8  | TAP2    |
| 9  | TIFA    |
| 10 | TLR2    |
| 11 | TLR4    |
| 12 | TM9SF2  |
| 13 | TM9SF3  |
| 14 | TMEM140 |
| 15 | TNF     |
| 16 | TNFSF10 |
| 17 | TRAFD1  |
| 18 | TUT1    |
| 19 | UBD     |
| 20 | UBE2L6  |
| 21 | USP9X   |
| 22 | VAMP5   |
| 23 | VPS36   |
| 24 | WARS    |
| 25 | ZDHHC8  |
| 26 | ZNF668  |
| 27 |         |
| 28 |         |
| 29 |         |
| 30 |         |
| 31 |         |
| 32 |         |
| 33 |         |
| 34 |         |
| 35 |         |
| 36 |         |
| 37 |         |
| 38 |         |
| 39 |         |
| 40 |         |
| 41 |         |
| 42 |         |
| 43 |         |
| 44 |         |
| 45 |         |
| 46 |         |
| 47 |         |
| 48 |         |
| 49 |         |
| 50 |         |
| 51 |         |
| 52 |         |
| 53 |         |
| 54 |         |
| 55 |         |
| 56 |         |
| 57 |         |
| 58 |         |
| 59 |         |
| 60 |         |

Confidential: For Review Only

|    |          |
|----|----------|
| 1  | Gene     |
| 2  |          |
| 3  | ADAM15   |
| 4  | ADAM28   |
| 5  | ADORA3   |
| 6  | ADORA3   |
| 7  | ALDH5A1  |
| 8  | ALOX15   |
| 9  | ALOX5AP  |
| 10 | ALOX5AP  |
| 11 | ARG1     |
| 12 | ARG2     |
| 13 | ARG2     |
| 14 | ARHGAP23 |
| 15 | ATG7     |
| 16 | AUH      |
| 17 | AUH      |
| 18 | BAP1     |
| 19 | BATF3    |
| 20 | BCL3     |
| 21 | BCL3     |
| 22 | C3AR1    |
| 23 | C5AR1    |
| 24 | C5AR1    |
| 25 | CABIN1   |
| 26 | CARD9    |
| 27 | CBR3     |
| 28 | CCDC6    |
| 29 | CCDC6    |
| 30 | CCL17    |
| 31 | CCL18    |
| 32 | CCL22    |
| 33 | CCL26    |
| 34 | CCL26    |
| 35 | CCRN4L   |
| 36 | CD14     |
| 37 | CD163    |
| 38 | CD163    |
| 39 | CD206    |
| 40 | CD209    |
| 41 | CD209    |
| 42 | CLIC2    |
| 43 | CRH      |
| 44 | CTNNA1   |
| 45 | CTNNA1   |
| 46 | CXORF40A |
| 47 | CYBB     |
| 48 | DAAM1    |
| 49 | DAP      |
| 50 | DAP      |
| 51 | DHRS11   |
| 52 | DLST     |
| 53 | DLST     |
| 54 | DUSP6    |
| 55 | EGLN3    |
| 56 | ESPNL    |
| 57 | ESPNL    |
| 58 | EXOC2    |
| 59 | FOS      |
| 60 | FOXD2    |
|    | FOXQ1    |

Confidential: For Review Only

|    |           |
|----|-----------|
| 1  |           |
| 2  | GALNT12   |
| 3  | GALNTL4   |
| 4  | GLS       |
| 5  | GOLGA8B   |
| 6  | GPD1L     |
| 7  | GPR65     |
| 8  | HARS2     |
| 9  | HEMK1     |
| 10 | HOMER2    |
| 11 | HPS1      |
| 12 | IL10      |
| 13 | IL10RA    |
| 14 | IL10RB    |
| 15 | IL13RA1   |
| 16 | IL17RB    |
| 17 | IL1R1     |
| 18 | IL1R2     |
| 19 | IL4I1     |
| 20 | IL4R      |
| 21 | INTS3     |
| 22 | IRF4      |
| 23 | ISYNA1    |
| 24 | ITPRIPL1  |
| 25 | KIAA0182  |
| 26 | KIAA1671  |
| 27 | KTN1      |
| 28 | LOC284998 |
| 29 | LOC152195 |
| 30 | LYZ       |
| 31 | MACF1     |
| 32 | MAOA      |
| 33 | MAP1A     |
| 34 | MLKL      |
| 35 | MMP1      |
| 36 | MMP12     |
| 37 | MMP7      |
| 38 | MMP9      |
| 39 | MUTED     |
| 40 | NAGPA     |
| 41 | NLRP12    |
| 42 | NMD3      |
| 43 | PALLD     |
| 44 | PELP1     |
| 45 | PITPNA    |
| 46 | PITRM1    |
| 47 | PPP1R14A  |
| 48 |           |
| 49 |           |
| 50 |           |
| 51 |           |
| 52 |           |
| 53 |           |
| 54 |           |
| 55 |           |
| 56 |           |
| 57 |           |
| 58 |           |
| 59 |           |
| 60 |           |

Confidential: For Review Only



|    |         |
|----|---------|
| 1  |         |
| 2  | PPP1R3B |
| 3  | RAB33A  |
| 4  | RAB40B  |
| 5  | RAMP1   |
| 6  | RAP1GAP |
| 7  | RASL10A |
| 8  | RASSF7  |
| 9  | RPL28   |
| 10 | RRP1B   |
| 11 | RTKN    |
| 12 | S100A8  |
| 13 | S100A9  |
| 14 | SNX8    |
| 15 | SOCS1   |
| 16 | SOCS3   |
| 17 | SOX8    |
| 18 | STAB1   |
| 19 | STAT6   |
| 20 | SUCNR1  |
| 21 | SULF2   |
| 22 | SYT17   |
| 23 | TGFBI   |
| 24 | TIGD5   |
| 25 | TOR3A   |
| 26 | TRIB2   |
| 27 | TTC9C   |
| 28 | UST     |
| 29 | WDR33   |
| 30 | WNT5A   |
| 31 | WNT5B   |
| 32 | ZNF317  |
| 33 |         |
| 34 |         |
| 35 |         |
| 36 |         |
| 37 |         |
| 38 |         |
| 39 |         |
| 40 |         |
| 41 |         |
| 42 |         |
| 43 |         |
| 44 |         |
| 45 |         |
| 46 |         |
| 47 |         |
| 48 |         |
| 49 |         |
| 50 |         |
| 51 |         |
| 52 |         |
| 53 |         |
| 54 |         |
| 55 |         |
| 56 |         |
| 57 |         |
| 58 |         |
| 59 |         |
| 60 |         |

Confidential: For Review Only

| Gene     | baseMean    | log2FoldChange | ratio       | Fold change  |
|----------|-------------|----------------|-------------|--------------|
| CXCL12   | 19.51263125 | 2.489846196    | 5.61718063  | 5.61718063   |
| ANKRD22  | 89.56258349 | 2.339358547    | 5.060775747 | 5.060775747  |
| CXCL10   | 94.59583781 | 1.699363322    | 3.247576076 | 3.247576076  |
| FAM26F   | 51.48535892 | 1.682373483    | 3.209555443 | 3.209555443  |
| CXCL9    | 1390.332009 | 1.648872185    | 3.135883982 | 3.135883982  |
| HAPLN3   | 44.68826456 | 1.615332581    | 3.063822208 | 3.063822208  |
| AIM2     | 26.90522505 | 1.554165757    | 2.936638655 | 2.936638655  |
| SLAMF7   | 461.3068025 | 1.38261185     | 2.607399868 | 2.607399868  |
| TLR2     | 395.533988  | 1.35500951     | 2.557988024 | 2.557988024  |
| KCNJ2    | 12.55091287 | 1.244461962    | 2.369301771 | 2.369301771  |
| UBD      | 97.05301695 | 1.22187405     | 2.332495099 | 2.332495099  |
| CXCL11   | 17.3031083  | 1.051506062    | 2.072692449 | 2.072692449  |
| STAT1    | 690.9780365 | 0.958123103    | 1.942780759 | 1.942780759  |
| GBP5     | 342.8407346 | 0.865903391    | 1.822480516 | 1.822480516  |
| CCL5     | 147.3033654 | 0.812839618    | 1.75666564  | 1.75666564   |
| USP9X    | 136.1824523 | 0.632556208    | 1.550309444 | 1.550309444  |
| ZDHHC8   | 49.34648962 | -0.679447059   | 0.624404544 | -1.601525821 |
| TNF      | 88.91998842 | -0.698377192   | 0.616265019 | -1.622678505 |
| SLC6A12  | 88.50785058 | -0.753287535   | 0.59325015  | -1.685629578 |
| ITGAL    | 819.1592004 | -0.81644516    | 0.567839392 | -1.761061339 |
| MDK      | 58.41483068 | -0.829116259   | 0.562873932 | -1.776596753 |
| OSCAR    | 212.3750855 | -1.122001946   | 0.459455822 | -2.176487819 |
| CLDN7    | 58.18743931 | -1.472364424   | 0.360391172 | -2.774762751 |
| SERPING1 | 4703.840371 | -1.498495967   | 0.353922168 | -2.82547998  |

1  
2  
3  
4  
5  
6  
7  
8  
9  
10  
11  
12  
13  
14  
15  
16  
17  
18  
19  
20  
21  
22  
23  
24  
25  
26  
27  
28  
29  
30  
31  
32  
33  
34  
35  
36  
37  
38  
39  
40  
41  
42  
43  
44  
45  
46  
47  
48  
49  
50  
51  
52  
53  
54  
55  
56  
57  
58  
59  
60

| lfcMLE       | lfcSE       | stat         | pvalue      | padj        | log2ratio T/NL<br>62 |
|--------------|-------------|--------------|-------------|-------------|----------------------|
| 2.901494743  | 0.296175957 | 8.406645224  | 4.22E-17    | 1.83E-15    | 1.498517216          |
| 2.521986278  | 0.274028265 | 8.536924266  | 1.38E-17    | 6.37E-16    | 0.082478085          |
| 1.641380525  | 0.304950028 | 5.572596045  | 2.51E-08    | 3.01E-07    | 0.109074652          |
| 1.837833442  | 0.288532028 | 5.830803238  | 5.52E-09    | 7.44E-08    | 2.023512456          |
| 1.495946795  | 0.336453948 | 4.900736621  | 9.55E-07    | 8.59E-06    | -0.73818597          |
| 1.817391956  | 0.283403287 | 5.699766572  | 1.20E-08    | 1.53E-07    | -2.567594602         |
| 1.588036669  | 0.269751323 | 5.761475934  | 8.34E-09    | 1.09E-07    | 1.841827458          |
| 1.525892975  | 0.25543981  | 5.412671783  | 6.21E-08    | 6.95E-07    | -0.821860336         |
| 1.461509408  | 0.189804527 | 7.138973627  | 9.40E-13    | 2.19E-11    | -0.774879989         |
| 1.403105198  | 0.31473418  | 3.954009582  | 7.69E-05    | 0.000445744 | 4.617959542          |
| 1.240676942  | 0.327186268 | 3.734490628  | 0.000188095 | 0.000974095 | -1.605627653         |
| 1.229738134  | 0.301579614 | 3.486661609  | 0.00048909  | 0.002269192 | -0.125161109         |
| 0.954904739  | 0.162169937 | 5.90814253   | 3.46E-09    | 4.83E-08    | 0.611857286          |
| 0.856237976  | 0.232384272 | 3.726170383  | 0.000194411 | 0.00100319  | -0.633561931         |
| 0.780106681  | 0.202750545 | 4.009062556  | 6.10E-05    | 0.000362276 | 1.054847315          |
| 0.638259206  | 0.136030266 | 4.650113725  | 3.32E-06    | 2.67E-05    | 1.180567474          |
| -0.713113129 | 0.154939258 | -4.385247907 | 1.16E-05    | 8.31E-05    | 0.346555168          |
| -0.709637996 | 0.233024618 | -2.997010347 | 0.002726415 | 0.009873199 | -1.166254622         |
| -0.763307071 | 0.137331534 | -5.48517529  | 4.13E-08    | 4.75E-07    | 1.321306951          |
| -0.822980645 | 0.098012229 | -8.33003357  | 8.08E-17    | 3.35E-15    | -0.059834351         |
| -0.935813471 | 0.18490372  | -4.484043147 | 7.32E-06    | 5.50E-05    | -1.8207842           |
| -1.142368102 | 0.118330612 | -9.48192463  | 2.50E-21    | 1.79E-19    | -0.542185885         |
| -1.53772971  | 0.16682362  | -8.825875028 | 1.09E-18    | 5.56E-17    | -2.325796213         |
| -1.537185473 | 0.17014526  | -8.807156684 | 1.28E-18    | 6.50E-17    | -2.086953916         |

| log2ratio T/NL<br>68 | log2ratio T/NL<br>70 | log2ratio T/NL<br>80 | log2ratio T/NL<br>88 | log2ratio T/NL<br>91 | log2ratio T/NL<br>96 |
|----------------------|----------------------|----------------------|----------------------|----------------------|----------------------|
| 4.180379503          | 3.052158268          | 3.190213663          | -1.412673177         | 0.491503945          | 4.633912016          |
| 3.023966014          | 3.279303025          | -2.104609117         | 0.918686364          | 2.678197607          | 5.521474877          |
| 1.293243319          | 3.497366863          | -0.254576864         | -1.508233198         | 1.241715773          | 6.350127209          |
| 2.164481768          | 2.397433731          | -1.11436417          | -0.921961851         | 1.539744353          | 5.098396792          |
| 3.152369964          | 3.146610705          | -1.283389601         | -2.378176651         | -1.194211857         | 5.587865945          |
| 2.283843167          | 3.554908549          | -0.433869754         | 1.641796891          | 4.738033289          | 6.882452149          |
| 2.666621566          | 2.626070517          | 0.048102224          | 0.180315072          | 1.957006943          | 5.644564705          |
| 2.999141029          | 2.928085151          | -0.873981238         | -1.749159576         | 0.304108499          | 4.388176833          |
| 1.534448137          | 2.159500667          | 3.736684578          | 2.763950282          | 1.198666176          | 2.893215014          |
| 3.109450042          | 2.924705292          | -2.8241056           | 0.212830158          | 0.7732887            | 3.578221627          |
| 4.205284291          | 2.537001995          | -2.538054294         | -2.254768743         | -0.190010314         | 6.536945649          |
| 1.323617504          | 3.203789037          | -0.794693188         | -5.001351498         | 1.15374806           | 4.975947949          |
| 2.741898437          | 2.003305522          | 0.749378226          | -0.370047319         | -0.042836991         | 3.102567688          |
| 2.427371774          | 2.864533245          | -1.092331494         | -0.516604903         | -0.167866669         | 4.548800285          |
| 1.592685512          | 2.937694967          | 1.168417462          | 0.716334928          | 1.404191176          | 3.351751672          |
| 0.578818113          | 1.440696009          | 0.119276497          | 0.267273903          | 1.456072708          | 1.799342692          |
| 0.187549396          | -1.265583577         | -3.211637068         | 1.078226134          | -0.337278241         | -2.034235652         |
| -0.277189708         | -2.951810767         | -1.926197201         | 1.321649095          | 2.146123835          | 1.574421018          |
| -0.259173232         | -1.442478111         | -3.330430429         | -1.178816932         | -0.340110033         | -1.59430356          |
| -0.361534439         | -1.183438209         | -1.522937571         | -0.971476041         | -0.417646399         | -1.500823545         |
| -0.456705083         | -1.103938846         | -1.948547895         | -0.60723727          | -0.599081623         | -1.367107886         |
| -1.419252255         | -1.547720692         | -2.025577018         | -1.460669577         | -1.644652761         | -1.987533249         |
| -2.564372706         | -1.752441747         | -0.470562065         | -0.774883008         | -1.755328922         | -1.315271983         |
| -0.161135434         | -1.559504559         | -2.312254604         | -1.8766309           | -2.881863195         | -0.275880196         |

1  
2  
3  
4  
5  
6  
7  
8  
9  
10  
11  
12  
13  
14  
15  
16  
17  
18  
19  
20  
21  
22  
23  
24  
25  
26  
27  
28  
29  
30  
31  
32  
33  
34  
35  
36  
37  
38  
39  
40  
41  
42  
43  
44  
45  
46  
47  
48  
49  
50  
51  
52  
53  
54  
55  
56  
57  
58  
59  
60

| <b>log2ratio T/NL<br/>99</b> | <b>log2ratio T/NL<br/>103</b> | <b>log2ratio T/NL<br/>105</b> | <b>log2ratio T/NL<br/>113</b> | <b>log2ratio T/NL<br/>117</b> | <b>log2ratio T/NL<br/>121</b> |
|------------------------------|-------------------------------|-------------------------------|-------------------------------|-------------------------------|-------------------------------|
| 3.18110689                   | 3.940611452                   | 2.632088572                   | 3.031313587                   | 3.288342116                   | 2.098736602                   |
| 0.654874614                  | 1.781982361                   | 2.430624226                   | 3.498825578                   | 3.871921785                   | 1.970742497                   |
| 1.388800259                  | 2.734718032                   | -0.535936501                  | 4.180626836                   | 4.126327059                   | 2.443129745                   |
| -0.638240796                 | 2.269321505                   | 1.421136548                   | 3.574255175                   | 3.299203854                   | 1.970742497                   |
| 4.676983173                  | 1.116969713                   | -0.240379096                  | 4.872749916                   | 4.979384084                   | 1.784735677                   |
| 2.883908431                  | 1.027394996                   | -0.201855932                  | 2.505346734                   | 2.578045117                   | 3.984264923                   |
| -0.388530756                 | 0.323823737                   | 0.74247951                    | 1.523516745                   | 2.535489375                   | 2.199065277                   |
| -0.111704697                 | 1.486412678                   | -0.009483558                  | 3.394272814                   | 3.083441138                   | 2.300446966                   |
| 2.10186886                   | 2.401259743                   | 1.771173324                   | -0.095187496                  | 0.367035749                   | 3.647281381                   |
| -1.120899283                 | 1.739714253                   | 0.614758455                   | -0.695245061                  | 2.520497867                   | -1.756952466                  |
| 0.743719486                  | 2.350934436                   | 0.906253603                   | 3.174345327                   | 3.007465166                   | -1.12601728                   |
| 1.319192334                  | 0.836088519                   | -0.262195309                  | 1.669135205                   | 3.732637994                   | 1.996019686                   |
| 0.583010007                  | 1.034877639                   | -0.935942398                  | 2.0891398                     | 2.107601189                   | 1.146471528                   |
| -0.101639405                 | 1.013065002                   | -0.125681653                  | 1.647888011                   | 2.092766469                   | 1.986586502                   |
| 1.955877517                  | -1.390794615                  | -0.677212562                  | 2.371408134                   | 3.051069896                   | -0.351061562                  |
| 0.691573886                  | -0.116036576                  | 0.458669805                   | 1.170838639                   | 0.689719071                   | 2.580841841                   |
| -1.397249008                 | -1.021330352                  | -0.305419039                  | -1.095119226                  | -2.273241476                  | -2.098473726                  |
| -2.28369926                  | -0.795470527                  | -2.64739504                   | 1.345983989                   | -2.02215487                   | -6.424497091                  |
| 0.093241337                  | -1.039470412                  | -1.414971364                  | -0.86388149                   | 0.043212166                   | -0.814713494                  |
| -0.741933616                 | -0.683318087                  | -0.47798044                   | -0.519615805                  | -0.111803532                  | -2.59973928                   |
| -2.44924169                  | -0.531251448                  | 0.653193286                   | -0.929574246                  | 0.360163973                   | -1.445694765                  |
| -1.289739052                 | -0.428269832                  | -0.993524315                  | -2.471073923                  | -0.339554364                  | -0.476054114                  |
| -2.635602886                 | -2.507041244                  | -1.771538671                  | -1.135638781                  | -0.636658036                  | -2.994346809                  |
| -2.53860485                  | -0.736943581                  | -2.243003516                  | -1.875311135                  | -0.440202235                  | -3.019557281                  |

| <b>log2ratio T/NL<br/>132</b> | <b>log2ratio T/NL<br/>135</b> | <b>log2ratio T/NL<br/>137</b> | <b>log2ratio T/NL<br/>149</b> | <b>log2ratio T/NL<br/>150</b> | <b>log2ratio T/NL<br/>153</b> |
|-------------------------------|-------------------------------|-------------------------------|-------------------------------|-------------------------------|-------------------------------|
| 1.537750248                   | -0.814132749                  | -0.293180431                  | 3.904785506                   | 4.33878523                    | -0.243957306                  |
| -1.658315208                  | 0.433274011                   | 4.453891232                   | 3.692163358                   | 3.622504817                   | 2.864321486                   |
| -2.11752607                   | -0.377848043                  | 0.332281554                   | 0.309689159                   | 3.272471572                   | -0.522018636                  |
| -2.393829277                  | -0.873812315                  | 3.685152237                   | 1.778240665                   | 2.261901055                   | -0.766738541                  |
| -3.779532397                  | -2.073527974                  | 1.856020498                   | 0.211397612                   | 4.804213335                   | -0.398412357                  |
| 0.226620016                   | 0.962011418                   | 2.062828592                   | 2.097677083                   | 2.575292242                   | -0.691371153                  |
| -0.930110172                  | 1.209174297                   | 3.509632286                   | 0.215290544                   | 0.620418303                   | -1.372213749                  |
| -1.449947141                  | 0.134905144                   | 2.379568209                   | 1.862918812                   | 2.132977955                   | -0.470466049                  |
| -0.881752426                  | 1.896425328                   | 2.344176973                   | 1.258519048                   | 1.411321543                   | 1.627016847                   |
| -1.222802806                  | -0.410703526                  | 1.547638905                   | 3.320380293                   | -0.019332422                  | -0.577931839                  |
| -3.445540808                  | -1.241585163                  | 2.113926652                   | 1.27342922                    | 4.954516118                   | 0.181192476                   |
| -1.697056596                  | -2.75459999                   | 1.738781968                   | -0.486405099                  | 3.197017002                   | 1.333730975                   |
| -0.766367972                  | 0.316830025                   | 1.112366402                   | 1.48527666                    | 1.379480368                   | 0.077611795                   |
| -1.72583312                   | 0.698856873                   | 2.750818057                   | 0.427122424                   | 1.993574019                   | -0.051275571                  |
| 0.517682432                   | -0.585160665                  | -0.796488424                  | 1.438841223                   | 1.934319772                   | -0.577568819                  |
| 0.683604221                   | 0.697762406                   | 0.045383808                   | -1.114232209                  | 1.094212823                   | 0.189391173                   |
| -1.022629884                  | -1.740375382                  | -0.972866547                  | 0.602825911                   | 0.23272373                    | -0.369757265                  |
| 1.357582527                   | -0.161466352                  | -2.036688216                  | 0.765630849                   | 0.89036996                    | -0.082286602                  |
| -1.451475251                  | -1.313612463                  | -0.010174431                  | -1.210507121                  | -0.336148512                  | -0.494644509                  |
| -0.622478642                  | -0.792339618                  | -1.773275728                  | -0.472647697                  | -0.840398333                  | -0.084741644                  |
| 0.014339203                   | -1.848179393                  | -3.170631737                  | -2.412997014                  | -0.783207416                  | -0.769843928                  |
| -0.858335118                  | -0.879599729                  | -0.847716878                  | -1.011577263                  | -1.200066806                  | -0.090824303                  |
| 0.092720733                   | -0.282991775                  | -1.431807104                  | -1.8455067                    | -2.414924578                  | 0.265712635                   |
| -0.404249669                  | -2.213249172                  | -2.33517576                   | -1.448769486                  | -0.400171764                  | -1.87353667                   |

1  
2  
3  
4  
5  
6  
7  
8  
9  
10  
11  
12  
13  
14  
15  
16  
17  
18  
19  
20  
21  
22  
23  
24  
25  
26  
27  
28  
29  
30  
31  
32  
33  
34  
35  
36  
37  
38  
39  
40  
41  
42  
43  
44  
45  
46  
47  
48  
49  
50  
51  
52  
53  
54  
55  
56  
57  
58  
59  
60

| <b>log2ratio T/NL<br/>156</b> | <b>log2ratio T/NL<br/>159</b> | <b>log2ratio T/NL<br/>161</b> | <b>log2ratio T/NL<br/>163</b> | <b>log2ratio T/NL<br/>164</b> | <b>log2ratio T/NL<br/>167</b> |
|-------------------------------|-------------------------------|-------------------------------|-------------------------------|-------------------------------|-------------------------------|
| 1.993884279                   | 2.948946631                   | 5.179086507                   | 3.639482967                   | 4.809560556                   | 1.096439596                   |
| 1.071038377                   | 4.840898568                   | 2.56631144                    | 1.127160123                   | 4.340313086                   | 3.768886406                   |
| 1.556878596                   | 0.948648638                   | 2.101066837                   | 1.401967689                   | 2.123110961                   | 2.660224024                   |
| 0.601222122                   | 0.444717052                   | 2.192819854                   | 2.201433842                   | 1.488578801                   | 5.496957571                   |
| 2.605826892                   | 0.727588827                   | 2.235451604                   | -0.364182361                  | 2.513981702                   | 1.908204085                   |
| 2.014600099                   | 1.384797688                   | 1.644307352                   | 0.927698776                   | 1.13025234                    | 1.019770348                   |
| 3.129115048                   | 1.579943016                   | 5.347481515                   | 0.51578063                    | 3.644655545                   | 1.894202045                   |
| 1.21651988                    | 0.721094306                   | 2.284893597                   | 2.204149948                   | 2.762061225                   | 3.026160186                   |
| 0.891793482                   | 3.565755433                   | 2.126103637                   | 0.749452049                   | 2.545207263                   | 3.307733591                   |
| 2.503025336                   | 3.694875349                   | 4.21561643                    | 2.906035847                   | 2.498380519                   | 2.427270576                   |
| 2.176881029                   | -0.551164199                  | 1.810450453                   | 0.29324162                    | 2.027321835                   | 1.166753745                   |
| 0.856684261                   | -0.565674732                  | 1.178589074                   | -0.122325649                  | 2.212206312                   | 1.214714867                   |
| 0.928671509                   | 0.303410777                   | 1.786387437                   | 1.27020632                    | 1.671998028                   | -0.039836733                  |
| 1.419607859                   | -0.092512518                  | 2.165803636                   | 0.190147066                   | 1.236401302                   | 0.005252288                   |
| 0.699578088                   | 1.022088317                   | -0.591587547                  | 1.113252271                   | 1.788511096                   | 1.636518483                   |
| 1.089701081                   | 0.239931858                   | 1.928513209                   | 0.547996511                   | -0.37312651                   | 2.069184463                   |
| -0.053807491                  | -0.55840396                   | -0.129416052                  | 0.066284066                   | -1.348343963                  | -2.074479249                  |
| -0.567515727                  | -0.473347405                  | -0.117859422                  | -0.74686428                   | -2.450846245                  | -0.589551137                  |
| -0.255212251                  | -1.360903479                  | -1.744495298                  | -0.492635962                  | -1.342757226                  | -1.951286881                  |
| -0.526821296                  | -0.041525304                  | -0.982046552                  | -1.133320254                  | -0.887645937                  | -1.447527087                  |
| 0.947824302                   | -0.023171814                  | -1.971260998                  | -1.567788587                  | -1.503683349                  | -2.506524442                  |
| -0.713683846                  | -0.289153428                  | -2.619233356                  | -0.830694206                  | -1.697400456                  | -2.17047849                   |
| 0.257179192                   | -1.497678899                  | -3.927330231                  | -2.277398632                  | -2.36387654                   | -1.782207494                  |
| -0.160164737                  | -2.43058195                   | -2.969978521                  | -1.697322265                  | -1.474630423                  | -4.69878326                   |

| <b>log2ratio T/NL<br/>179</b> | <b>log2ratio T/NL<br/>186</b> | <b>log2ratio T/NL<br/>192</b> | <b>log2ratio T/NL<br/>196</b> | <b>log2ratio T/NL<br/>203</b> | <b>log2ratio T/NL<br/>210</b> |
|-------------------------------|-------------------------------|-------------------------------|-------------------------------|-------------------------------|-------------------------------|
| 2.094948875                   | 2.69427697                    | 1.289984071                   | 4.525863708                   | 4.602038638                   | -0.248928008                  |
| 2.848150301                   | 3.237437498                   | 5.457822148                   | 3.136503171                   | -0.300867536                  | -0.277604131                  |
| 2.520899388                   | 3.474153542                   | 3.07968319                    | 7.674819847                   | -0.993253085                  | -2.140666405                  |
| 2.93224584                    | 2.102607505                   | 5.268711722                   | 5.598121933                   | -1.102175624                  | -2.37222149                   |
| 0.97811757                    | 4.549470149                   | 2.748105429                   | 6.735066114                   | -1.071163229                  | -4.080247764                  |
| 1.313870647                   | 2.183315815                   | 3.435363768                   | 4.956564396                   | -1.911739637                  | -3.147279773                  |
| 1.121726179                   | 1.211330314                   | 2.191002735                   | 2.427921498                   | -0.343941358                  | -2.08173621                   |
| 1.821645173                   | 2.194426071                   | 2.562506474                   | 4.829876885                   | -1.172801546                  | -0.845127388                  |
| 1.810492765                   | 0.457761547                   | 1.263604081                   | -0.646473315                  | 0.145427482                   | -0.499790965                  |
| 1.317197174                   | 2.860569014                   | -0.100133336                  | 0.475376921                   | 0.136783035                   | -1.777863952                  |
| 0.91872695                    | 3.991764139                   | 2.631087296                   | 3.701181804                   | -1.418366531                  | -3.830092551                  |
| 1.051249266                   | 1.001681295                   | 1.737522846                   | 5.28774686                    | -0.886955246                  | 0.124544554                   |
| -0.02618618                   | 1.361331053                   | 2.209169582                   | 2.321143054                   | -0.267206596                  | -0.887045217                  |
| 0.140912981                   | 1.600040165                   | 1.884486724                   | 3.421758431                   | -1.477617664                  | -2.232299231                  |
| -0.837268536                  | 0.134606492                   | 1.537421396                   | -0.268457115                  | -0.856282887                  | -1.513665126                  |
| 1.057225779                   | -0.497824942                  | -0.350345406                  | 0.999670325                   | 0.250143405                   | 0.393559889                   |
| -1.400206456                  | -0.130497255                  | -0.439973096                  | -0.041550458                  | 0.767820196                   | -0.776597084                  |
| -0.729705229                  | -0.473445195                  | 1.719543192                   | -1.036204478                  | -2.678320024                  | -1.501126552                  |
| -1.184126907                  | -0.513370431                  | 0.291827841                   | -0.965038305                  | -0.182141017                  | 0.080560628                   |
| -1.024375974                  | -0.435668308                  | -0.30699092                   | -0.367283017                  | -1.198278001                  | -1.712814904                  |
| -2.162501117                  | -0.125033834                  | 1.850089292                   | 0.324810528                   | -1.932301333                  | -0.977653689                  |
| -1.913388172                  | -0.565461266                  | -0.841799799                  | -1.191500694                  | -0.75296904                   | -0.050471677                  |
| -2.837320565                  | -0.600682197                  | -0.821723216                  | -2.417818206                  | -0.532566748                  | -0.419820359                  |
| -2.274273825                  | 0.955687447                   | -0.998577348                  | -0.439236358                  | -1.681732316                  | -1.59445756                   |



1  
2  
3  
4  
5  
6  
7  
8  
9  
10  
11  
12  
13  
14  
15  
16  
17  
18  
19  
20  
21  
22  
23  
24  
25  
26  
27  
28  
29  
30  
31  
32  
33  
34  
35  
36  
37  
38  
39  
40  
41  
42  
43  
44  
45  
46  
47  
48  
49  
50  
51  
52  
53  
54  
55  
56  
57  
58  
59  
60

| <b>log2ratio T/NL<br/>227</b> | <b>log2ratio T/NL<br/>228</b> |
|-------------------------------|-------------------------------|
| 1.489468067                   | 1.380133043                   |
| 4.392277522                   | 0.777596653                   |
| 5.42579036                    | -0.550641319                  |
| 4.535095243                   | 0.729456026                   |
| 5.916476361                   | -0.054485125                  |
| 4.278405485                   | 0.729456026                   |
| 4.020950409                   | -1.305192397                  |
| 4.396855182                   | 1.238225941                   |
| 1.077930085                   | -0.292757447                  |
| 2.896915246                   | -1.631670657                  |
| 6.551306815                   | 0.61803738                    |
| 4.700751196                   | 0.66014023                    |
| 2.158067246                   | 0.235757887                   |
| 2.681210936                   | -0.395663057                  |
| 3.202977256                   | -0.53609824                   |
| -0.613251507                  | 0.201408639                   |
| -0.845985941                  | -0.810364221                  |
| -1.057834976                  | -1.160495688                  |
| 0.312040649                   | -0.544554968                  |
| -0.5889423                    | -0.956566626                  |
| 0.632130793                   | -0.643048529                  |
| -2.329659651                  | -0.552508693                  |
| -1.762924935                  | -1.573234995                  |
| 0.717642003                   | -1.286545191                  |

| Gene    | baseMean    | log2FoldChange | ratio       | Fold change  | lfcMLE       |
|---------|-------------|----------------|-------------|--------------|--------------|
| MMP12   | 619.4816667 | 4.510936887    | 22.7996044  | 22.7996044   | 4.662037728  |
| EGLN3   | 10.84181384 | 3.687850001    | 12.8870487  | 12.8870487   | 4.622150154  |
| WNT5A   | 14.4120669  | 3.197318715    | 9.172523623 | 9.172523623  | 3.755334326  |
| ADAM28  | 136.2307988 | 2.969442729    | 7.832336393 | 7.832336393  | 3.136442248  |
| MMP9    | 709.8776221 | 2.953047801    | 7.743832788 | 7.743832788  | 2.993709956  |
| ADORA3  | 161.7510606 | 2.703517572    | 6.51388194  | 6.51388194   | 2.862060832  |
| MMP1    | 14.1233665  | 2.689277682    | 6.449903974 | 6.449903974  | 3.360448353  |
| STAB1   | 628.1641159 | 2.449766404    | 5.463276361 | 5.463276361  | 2.631599763  |
| MMP7    | 25.6851934  | 2.326990482    | 5.017575715 | 5.017575715  | 2.605286593  |
| IL4I1   | 359.5301932 | 2.322887979    | 5.003327812 | 5.003327812  | 2.41483146   |
| CD209   | 311.8945887 | 2.158789819    | 4.465401252 | 4.465401252  | 2.251471622  |
| SULF2   | 344.44726   | 1.919140064    | 3.781975622 | 3.781975622  | 2.197874071  |
| IL10    | 51.87247215 | 1.561824027    | 2.952268686 | 2.952268686  | 1.823590983  |
| CD14    | 1179.964207 | 1.52456077     | 2.876991124 | 2.876991124  | 1.553227489  |
| IL1R2   | 102.1495033 | 1.26968122     | 2.41108284  | 2.41108284   | 1.740245493  |
| SYT17   | 15.17546521 | 1.150602432    | 2.220065792 | 2.220065792  | 1.298119304  |
| SOCS3   | 519.0378287 | 1.094852168    | 2.135911939 | 2.135911939  | 1.133295804  |
| TRIB2   | 11.12077508 | 1.087232046    | 2.12466008  | 2.12466008   | 1.215203011  |
| MACF1   | 292.0586868 | 1.018158424    | 2.025332007 | 2.025332007  | 1.029434103  |
| PALLD   | 96.53308326 | 0.974606148    | 1.965104655 | 1.965104655  | 1.02385414   |
| PPP1R3B | 56.65298822 | 0.927971433    | 1.902598879 | 1.902598879  | 0.956969119  |
| IRF4    | 28.26617219 | 0.815489935    | 1.759895706 | 1.759895706  | 0.963225204  |
| SUCNR1  | 17.43026275 | 0.680254985    | 1.602422946 | 1.602422946  | 0.763829076  |
| FOS     | 1988.67157  | 0.643018625    | 1.561593145 | 1.561593145  | 0.640655023  |
| CBR3    | 12.89416567 | 0.626843209    | 1.544182436 | 1.544182436  | 0.678039042  |
| CLIC2   | 34.90845215 | 0.619590668    | 1.53643919  | 1.53643919   | 0.620570363  |
| TGFBI   | 4425.620552 | 0.605233176    | 1.521224602 | 1.521224602  | 0.608319752  |
| C3AR1   | 833.534316  | 0.590410088    | 1.505674677 | 1.505674677  | 0.6071536    |
| NAGPA   | 99.71325713 | -0.586114283   | 0.666134643 | -1.501198009 | -0.590733157 |
| HOMER2  | 10.43916248 | -0.924570724   | 0.526837256 | -1.898119369 | -0.938995656 |
| ALOX5AP | 6363.505702 | -0.958198311   | 0.514699287 | -1.942882039 | -0.985957657 |
| BATF3   | 37.67526449 | -1.70571994    | 0.306568221 | -3.261916701 | -1.799684005 |
| GALNT12 | 86.49749034 | -2.121089279   | 0.229873286 | -4.350222757 | -2.337890527 |

1  
2  
3  
4  
5  
6  
7  
8  
9  
10  
11  
12  
13  
14  
15  
16  
17  
18  
19  
20  
21  
22  
23  
24  
25  
26  
27  
28  
29  
30  
31  
32  
33  
34  
35  
36  
37  
38  
39  
40  
41  
42  
43  
44  
45  
46  
47  
48  
49  
50  
51  
52  
53  
54  
55  
56  
57  
58  
59  
60

| lfcSE       | stat         | pvalue      | padj        | log2ratio T/NL | log2ratio T/NL |
|-------------|--------------|-------------|-------------|----------------|----------------|
|             |              |             |             | 62             | 68             |
| 0.295104678 | 15.28588744  | 9.50E-53    | 6.76E-49    | 1.817187227    | 1.783688961    |
| 0.418330602 | 8.815635255  | 1.19E-18    | 6.07E-17    | 0              | 5.167067628    |
| 0.309528848 | 10.32963079  | 5.18E-25    | 6.30E-23    | 0.736560532    | 2.728622178    |
| 0.22546803  | 13.1701276   | 1.30E-39    | 1.55E-36    | 1.98502803     | 4.063150679    |
| 0.237700893 | 12.423377    | 1.95E-35    | 1.26E-32    | 2.922277896    | 2.032341516    |
| 0.187725447 | 14.40144429  | 5.07E-47    | 1.33E-43    | 2.39009469     | 2.376071274    |
| 0.532324294 | 5.051953695  | 4.37E-07    | 4.17E-06    | 1.886258801    | 0              |
| 0.185025386 | 13.24016373  | 5.14E-40    | 6.66E-37    | 2.242718598    | 2.172778652    |
| 0.33333039  | 6.981033087  | 2.93E-12    | 6.42E-11    | 0.715252882    | 1.016532561    |
| 0.212891343 | 10.91114341  | 1.02E-27    | 1.81E-25    | 0.374408901    | 3.229792802    |
| 0.174391163 | 12.37900924  | 3.40E-35    | 1.79E-32    | 2.108097718    | 1.015693113    |
| 0.258385902 | 7.427417848  | 1.11E-13    | 2.91E-12    | 0.980724741    | 3.878728223    |
| 0.219384281 | 7.119124576  | 1.09E-12    | 2.51E-11    | -0.530828499   | 2.007514439    |
| 0.122792284 | 12.41577016  | 2.15E-35    | 1.33E-32    | 1.458875224    | 1.102467278    |
| 0.2988357   | 4.248760174  | 2.15E-05    | 0.000144308 | -0.740959125   | 2.079122647    |
| 0.238101824 | 4.832396538  | 1.35E-06    | 1.17E-05    | 1.043796456    | 2.574362951    |
| 0.162323464 | 6.744879289  | 1.53E-11    | 3.06E-10    | 0.140705875    | 0.980453038    |
| 0.270598875 | 4.017873486  | 5.87E-05    | 0.00034948  | 1.385512441    | 0.6418619      |
| 0.144482036 | 7.04695513   | 1.83E-12    | 4.08E-11    | 1.467776584    | 1.624033054    |
| 0.170073157 | 5.730511298  | 1.00E-08    | 1.29E-07    | 0.859277085    | 1.475351943    |
| 0.15863395  | 5.84976564   | 4.92E-09    | 6.71E-08    | -0.000528049   | 0.141834606    |
| 0.232150079 | 3.512770443  | 0.00044346  | 0.002088797 | -0.058957917   | 0.925970171    |
| 0.215021514 | 3.163660103  | 0.001557986 | 0.006145199 | -0.83314972    | 0.769281056    |
| 0.113421109 | 5.669302924  | 1.43E-08    | 1.80E-07    | -0.084447353   | 0.603405724    |
| 0.250605883 | 2.501310823  | 0.012373453 | 0.035542787 | 1.060812968    | 0.942402457    |
| 0.154834283 | 4.001637468  | 6.29E-05    | 0.000372537 | 0.105284313    | 0.437906093    |
| 0.109789629 | 5.512662561  | 3.53E-08    | 4.11E-07    | -0.188014491   | -0.472151355   |
| 0.128873679 | 4.58130855   | 4.62E-06    | 3.62E-05    | -0.284519786   | 0.766952851    |
| 0.134812432 | -4.347627856 | 1.38E-05    | 9.71E-05    | -0.081826418   | -0.723233283   |
| 0.327379318 | -2.824157397 | 0.00474051  | 0.015874911 | -3.379398055   | -0.848895894   |
| 0.137828037 | -6.952129158 | 3.60E-12    | 7.83E-11    | -1.316289228   | -2.475170632   |
| 0.181611806 | -9.392120356 | 5.88E-21    | 4.03E-19    | -1.834325986   | -0.907990377   |
| 0.2013818   | -10.53267611 | 6.11E-26    | 8.05E-24    | -0.549380797   | -1.609833423   |

| log2ratio T/NL<br>70 | log2ratio T/NL<br>80 | log2ratio T/NL<br>88 | log2ratio T/NL<br>91 | log2ratio T/NL<br>96 | log2ratio T/NL<br>99 |
|----------------------|----------------------|----------------------|----------------------|----------------------|----------------------|
| 4.785718709          | 2.709253308          | 4.064215243          | 5.226393583          | 5.731673076          | 4.944561121          |
| 4.512800716          | 3.253575361          | -1.024555882         | 0.783759824          | 5.607494731          | 1.22959072           |
| 2.469055949          | 2.762345338          | 5.111625244          | 5.115457718          | 3.698873713          | 2.331995687          |
| 3.820277676          | -0.366402304         | 3.954645627          | 4.729691981          | 4.492884466          | 2.689686502          |
| 4.648469766          | 3.196701291          | 1.276103192          | 1.320827324          | 4.115711613          | 2.381964457          |
| 2.506275543          | 3.548120489          | 0.230502898          | 3.792400338          | 3.129132328          | 2.039048759          |
| 3.879901248          | 0                    | 1.498055983          | 0.783759824          | 3.72255626           | 0                    |
| 3.963406524          | 3.313370533          | 1.254577151          | 2.189919646          | 3.132957468          | 3.032971269          |
| 4.54379068           | 0.023909176          | 3.234862669          | 1.255332716          | -1.603328744         | 0.260497024          |
| 3.937969862          | 0.777798487          | -0.052666245         | 1.502235439          | 5.294246251          | 2.181776531          |
| 2.998921942          | 0.542795114          | 0.089068953          | 2.266145427          | 2.481909581          | 3.161737908          |
| 4.20845089           | 3.532663105          | 1.095625122          | 1.15215594           | 4.015413934          | 1.996091486          |
| 3.323717003          | 4.061940084          | 1.417873196          | 0.939100997          | 1.805696746          | 0.857976025          |
| 2.162353743          | 1.886461586          | 0.621635216          | 1.478749728          | 1.712469981          | 1.570741604          |
| 5.43450251           | 3.942521337          | 3.087061465          | -3.923220816         | 3.691232699          | 3.518461181          |
| 2.207136502          | 0.526803425          | -0.16869468          | 4.159314054          | 1.26090301           | 3.012306905          |
| 1.824070258          | 3.593512139          | 0.144649835          | 0.260724732          | 2.161638041          | 1.68063464           |
| 1.829163047          | -2.475425107         | -0.290088975         | 2.630192777          | 1.801119315          | 2.331995687          |
| 1.574899299          | -0.270352763         | 1.018631275          | 1.18057327           | 1.891037355          | 1.799441935          |
| 1.813671391          | 1.73525014           | 0.467579321          | -0.081634104         | -0.622062685         | 2.04728428           |
| 0.975507755          | 1.437827179          | 0.684115429          | -0.339876156         | 1.563334241          | 3.242506482          |
| 1.671807392          | 2.678477603          | 1.563153668          | 0.489405824          | 0.560157533          | 1.472885122          |
| 1.385328363          | -2.263362818         | -1.544646356         | 0.920752603          | 0.949555941          | 3.416968562          |
| 0.438463598          | 1.357530991          | 0.213778676          | 0.974903072          | 0.507978966          | 0.90482163           |
| -0.219965332         | -4.018311128         | 0.978558764          | 0.527892682          | 1.117537689          | 0.665158682          |
| 0.499907401          | -2.104609117         | 0.934502335          | 0.420664055          | 2.081286366          | 1.451608578          |
| 0.694289924          | 1.834989352          | 0.331765307          | 0.077062666          | 0.883783626          | 0.321633489          |
| 0.935883503          | -0.525020542         | -0.863134469         | 1.622339872          | 1.612504208          | 0.589413635          |
| -0.946864092         | -4.218941355         | -2.37450984          | -0.689561453         | -0.62479234          | -0.94243047          |
| 3.056305566          | -3.948988807         | 0                    | 1.243452872          | -2.709285673         | -4.772639836         |
| -1.876940233         | 0.164617526          | 0.456709608          | -0.45929313          | -1.267438791         | -2.273914992         |
| -2.133200819         | -2.724364777         | -4.835432945         | -1.86685459          | -0.061549559         | -2.865853588         |
| -3.057902475         | -4.866519907         | -3.975795457         | -1.844528735         | -3.688095567         | -2.616279015         |

| <b>log2ratio T/NL<br/>103</b> | <b>log2ratio T/NL<br/>105</b> | <b>log2ratio T/NL<br/>113</b> | <b>log2ratio T/NL<br/>117</b> | <b>log2ratio T/NL<br/>121</b> | <b>log2ratio T/NL<br/>132</b> |
|-------------------------------|-------------------------------|-------------------------------|-------------------------------|-------------------------------|-------------------------------|
| 4.03570892                    | 4.898322621                   | 7.675582185                   | 3.651405888                   | 4.473920558                   | 1.617057436                   |
| 3.193832082                   | 3.926735545                   | 1.719980042                   | 0                             | 4.251687275                   | 3.4704772                     |
| 1.784552062                   | 4.033575276                   | 4.234710366                   | 2.520497867                   | 2.078315822                   | 1.89559662                    |
| 2.539331887                   | 4.845181323                   | 2.100730298                   | 2.638265782                   | 2.689247065                   | -3.140953565                  |
| 3.81159475                    | 2.695558783                   | 2.477728112                   | 1.987585904                   | 4.698258282                   | 0.962576988                   |
| 2.651431114                   | 3.472650118                   | 2.660944109                   | 3.506491201                   | 5.450479432                   | 2.715453848                   |
| 0.859999968                   | 1.751874839                   | 0                             | -2.855295387                  | 6.383917919                   | 0                             |
| 3.353113841                   | 4.054846771                   | 3.490653186                   | 1.877226288                   | 2.92766698                    | 2.127207755                   |
| 1.903461056                   | 1.421136548                   | 1.690792962                   | 1.624694565                   | 6.476698071                   | 1.292586253                   |
| 3.519581209                   | 2.777194176                   | 3.54685047                    | 1.704189614                   | 4.047079128                   | 1.00458348                    |
| 2.659998045                   | 2.256316857                   | 4.308352677                   | 2.433739158                   | 1.56820658                    | 2.545970489                   |
| 3.75090991                    | 1.910176026                   | 0.022598694                   | 0.165967029                   | 2.915318086                   | 1.293622285                   |
| 2.220570276                   | 1.063697514                   | 2.874401298                   | 1.70730707                    | 4.881527781                   | -0.292709913                  |
| 2.674522366                   | 2.18461284                    | 1.52244887                    | 1.193093274                   | 1.771708334                   | 0.682248377                   |
| 1.839881628                   | 4.554319709                   | 3.039946279                   | -0.003055755                  | 1.559810422                   | 2.067568298                   |
| -0.012477524                  | 2.06412947                    | 0.841312371                   | 0.17475355                    | 2.765884912                   | 3.632093274                   |
| 0.530925031                   | 1.752471665                   | 2.036840296                   | 0.16982509                    | 1.947434722                   | 0.228898577                   |
| -1.827390759                  | 4.22956463                    | 0.229657272                   | -0.637257545                  | 1.635008663                   | 2.372009996                   |
| 0.392596586                   | 1.968799575                   | 1.76271433                    | 1.045582381                   | 0.608879451                   | 0.723805273                   |
| 3.526056691                   | 1.65121893                    | 4.314814543                   | 1.296786656                   | 0.634489832                   | 0.430420935                   |
| 0.063683766                   | -0.101381337                  | 0.177599428                   | 0.727650641                   | 2.310801483                   | 1.274282326                   |
| -0.012477524                  | -0.642854927                  | 1.194092009                   | -0.277783721                  | -1.071208787                  | 0.340594612                   |
| 2.090905271                   | 1.312087729                   | 1.970934618                   | 0.026212557                   | 0.30055948                    | 0.013111631                   |
| -0.466986064                  | 0.364690574                   | 0.432763212                   | 0.123618762                   | 1.671882409                   | 0.026379633                   |
| 1.17272256                    | 2.790750989                   | 0.301188919                   | 3.245823363                   | 0                             | 1.127784317                   |
| 0.651097326                   | 1.803619222                   | -0.452151407                  | -0.136753417                  | 1.470117726                   | -0.586047372                  |
| 0.848399297                   | 0.451437003                   | 1.070386343                   | 1.387329586                   | 1.605182927                   | 1.580703421                   |
| 2.481947968                   | 1.359014666                   | 1.314442735                   | 0.693596123                   | 0.645108178                   | 0.469970635                   |
| 0.645357617                   | -0.713228506                  | -1.127056281                  | 0.076132874                   | -0.805714772                  | -0.331378414                  |
| 0.041390345                   | -0.583528195                  | -2.321476014                  | -2.366721618                  | -1.768178368                  | 1.514595915                   |
| -1.237087141                  | -0.852562006                  | -1.225629044                  | -1.448354748                  | -1.440086979                  | -0.633715954                  |
| -0.75292739                   | -1.345238309                  | -0.807810547                  | -1.56013428                   | -2.919683254                  | 0.114436974                   |
| -3.261519861                  | -1.370467502                  | -3.1666424                    | -3.489976088                  | -4.341211933                  | -1.75825696                   |

| <b>log2ratio T/NL<br/>135</b> | <b>log2ratio T/NL<br/>137</b> | <b>log2ratio T/NL<br/>149</b> | <b>log2ratio T/NL<br/>150</b> | <b>log2ratio T/NL<br/>153</b> | <b>log2ratio T/NL<br/>156</b> |
|-------------------------------|-------------------------------|-------------------------------|-------------------------------|-------------------------------|-------------------------------|
| 6.192454263                   | 8.022624568                   | 7.009211227                   | 5.149594554                   | 6.38241489                    | 1.235262987                   |
| 5.033249463                   | 5.941293909                   | 5.198568212                   | 0.836267051                   | 4.901600538                   | 0.056753498                   |
| 5.603451022                   | 4.344662749                   | 1.878771893                   | 4.124654707                   | 3.112015319                   | 2.854333865                   |
| 2.297132549                   | 3.937537847                   | 2.072703594                   | 2.965438209                   | 3.322420678                   | 1.908462314                   |
| 2.159362304                   | 4.260752337                   | 6.438630442                   | 4.890434232                   | 2.386296559                   | 1.285495873                   |
| 0.770375274                   | 3.531510833                   | 2.865931365                   | 1.605467618                   | 1.505354757                   | 1.251835178                   |
| 7.646622399                   | 6.027375011                   | 5.980139975                   | 3.475566892                   | 1.714049886                   | 0                             |
| 3.009490791                   | 2.724823903                   | 2.824286464                   | 3.540614654                   | 0.032557721                   | 0.754789493                   |
| 0                             | 5.984976389                   | 4.295539754                   | 2.757111828                   | 0.815795393                   | -2.44333057                   |
| 1.389857736                   | 3.152055438                   | 3.302585413                   | 2.854326479                   | 2.007523546                   | 0.918914143                   |
| 1.824745731                   | 2.413165114                   | 3.316404337                   | 1.055718317                   | 1.271504355                   | -0.213514831                  |
| 3.169374537                   | 3.241114872                   | 4.443522095                   | 2.188697042                   | 2.721787683                   | -0.282268648                  |
| 3.928600703                   | 0.526303933                   | 2.180365853                   | 1.938282676                   | 0.466059433                   | -0.966268704                  |
| 1.668189582                   | 1.686308147                   | 2.739368315                   | 1.308135522                   | 0.72993136                    | -0.187588396                  |
| 3.41333792                    | 3.330441913                   | 4.739476009                   | 1.939440793                   | 2.522600075                   | -0.376433204                  |
| 0.755150256                   | 2.090566695                   | 0.07890777                    | 0.300680409                   | 1.107156629                   | -0.100754036                  |
| 1.449519141                   | 0.324871737                   | 2.302949738                   | 1.488072848                   | -0.051050185                  | -0.406887216                  |
| -2.26038839                   | 2.383792468                   | 1.68142726                    | 1.379714966                   | 4.208374633                   | 0.868270153                   |
| 2.453295289                   | 2.031513943                   | 0.213526351                   | 1.1103393                     | 0.6718744                     | 0.30380921                    |
| 0.279672878                   | 0.718487975                   | -0.186923271                  | -0.433228788                  | 0.525844138                   | 0.051567789                   |
| 1.380434633                   | 1.115523978                   | 2.192440378                   | 0.175882981                   | 1.778325317                   | 0.379848317                   |
| 3.632884854                   | -2.108062959                  | 0.29134128                    | 1.867070244                   | 2.349818398                   | -0.083504169                  |
| 0.943656233                   | 0.749263385                   | -4.243471345                  | 0.966140778                   | 2.263437647                   | 2.245620155                   |
| 1.097234446                   | 0.32990545                    | 0.717548514                   | 0.468803714                   | -0.374463883                  | 0.289048619                   |
| -2.26038839                   | 1.308835951                   | -0.669728901                  | -2.617680426                  | 0.108827815                   | 2.872640755                   |
| -0.884671839                  | 0.307838382                   | -1.148461939                  | 1.273398602                   | 0.167128013                   | 1.683246264                   |
| 1.281115365                   | 2.034081737                   | 1.088542885                   | -0.081280761                  | 0.50101714                    | -0.418561497                  |
| -0.043268667                  | 0.412839462                   | -0.056964174                  | 0.96036889                    | 0.775919647                   | 0.701480647                   |
| -0.172828465                  | -1.222216836                  | 0.004945834                   | -0.246887367                  | -1.604760661                  | -0.991780936                  |
| 0                             | -2.614075227                  | -1.877138398                  | 2.599760039                   | -0.690916547                  | -0.646390773                  |
| -2.244258939                  | -1.704893685                  | -1.190946336                  | -0.602145442                  | 0.294277907                   | -0.188131011                  |
| -2.721182535                  | -2.132024593                  | -0.316903767                  | -0.836319222                  | -1.432128962                  | -2.760830349                  |
| -1.640980869                  | -4.025636123                  | -2.94961654                   | -0.556084285                  | 1.404852236                   | -1.59609571                   |

| <b>log2ratio T/NL<br/>159</b> | <b>log2ratio T/NL<br/>161</b> | <b>log2ratio T/NL<br/>163</b> | <b>log2ratio T/NL<br/>164</b> | <b>log2ratio T/NL<br/>167</b> | <b>log2ratio T/NL<br/>179</b> |
|-------------------------------|-------------------------------|-------------------------------|-------------------------------|-------------------------------|-------------------------------|
| 3.796946456                   | 1.696876854                   | 0.916249745                   | 1.91311282                    | 7.187975812                   | 4.595780381                   |
| 1.318313697                   | 4.551362039                   | 0                             | 3.214313224                   | 5.594361894                   | 3.861282708                   |
| 2.840805252                   | 4.653875625                   | 3.669452463                   | 1.425249935                   | 4.381419229                   | 2.66926657                    |
| 4.777840801                   | 4.814916507                   | 3.173797928                   | 5.423723264                   | 5.002541668                   | 4.617437631                   |
| 2.875033154                   | 1.475058983                   | 1.532728385                   | 3.253217009                   | 3.027138129                   | 1.465475484                   |
| 5.905396976                   | 2.815610382                   | 3.0830622                     | 4.763136344                   | 4.811767721                   | 0.59621604                    |
| 0                             | -1.964359749                  | 0                             | -1.061977183                  | 2.305332151                   | 4.412770246                   |
| 5.495580656                   | 3.333644558                   | 3.666513953                   | 4.534262951                   | 3.276380197                   | 0.912284442                   |
| 2.454500646                   | 0.905381051                   | 2.557017273                   | -0.387781637                  | 6.736975138                   | 2.881085863                   |
| 2.525350296                   | 1.52938469                    | 2.080269014                   | 3.687090298                   | 3.39598135                    | 1.327876651                   |
| 4.251319371                   | 1.840367857                   | 3.155166238                   | 3.45987761                    | 5.029868182                   | 1.271780473                   |
| 4.03287436                    | 1.628408323                   | 2.38591714                    | 1.359805979                   | 7.592856634                   | 2.577060685                   |
| 2.901671401                   | 2.515725225                   | 4.215029376                   | 0.729563172                   | 4.199572374                   | 0.945518748                   |
| 1.980350363                   | 0.766605063                   | 2.762592509                   | 2.873287924                   | 3.044316402                   | 1.29427046                    |
| 0.225859445                   | -0.667797101                  | 2.534445073                   | 2.042424973                   | 1.537397762                   | 2.344591004                   |
| 2.539704743                   | 2.637865916                   | 0.127826172                   | 1.55260616                    | 1.80202421                    | -1.05276941                   |
| 1.399893141                   | 1.565512951                   | 1.965801006                   | -0.693301914                  | 4.005543887                   | 2.250028876                   |
| 2.106288778                   | 1.895695806                   | 0.89347278                    | 2.139952702                   | 3.468292436                   | -0.048193499                  |
| 0.593385371                   | 3.293911525                   | 2.26993783                    | 0.794430894                   | 1.495559858                   | 1.311354623                   |
| 1.166295047                   | 1.444033584                   | 2.79539834                    | 0.084424654                   | 1.213246024                   | 2.222365816                   |
| 1.017571712                   | 2.246964241                   | 0.997112761                   | 0.556467304                   | 2.537675227                   | 1.343359924                   |
| 3.121759641                   | 2.611107486                   | 2.511445421                   | 2.270739441                   | 2.72940186                    | 1.511278257                   |
| 0.745726043                   | 2.192819854                   | 0.36868206                    | 0.2474847                     | 1.088692539                   | 1.128119312                   |
| 1.549986703                   | 1.403774483                   | 1.512213609                   | -0.683417248                  | 0.148009314                   | 1.713169365                   |
| 0.78092339                    | 1.88100615                    | -1.059958704                  | -0.369796043                  | 0.616026958                   | -0.470155737                  |
| 1.084277501                   | 0.56270613                    | 0.100893212                   | 0.903831081                   | 1.284878557                   | 0.845807046                   |
| 0.618858867                   | 0.225456279                   | 0.136144516                   | 0.655819605                   | -0.096937486                  | 0.17868029                    |
| 0.660149722                   | 0.578075154                   | -0.131182359                  | 2.557420376                   | 1.121750688                   | 0.454322717                   |
| 0.038556245                   | -0.626839871                  | -0.483692244                  | -0.503749716                  | -0.781151805                  | -1.276070237                  |
| -0.909448218                  | -0.829188825                  | -0.788520411                  | -1.208482833                  | -4.616678528                  | -1.443360749                  |
| -0.087383562                  | -2.327376734                  | -2.404845974                  | -1.877796957                  | -0.401322353                  | -1.33731722                   |
| -1.297820313                  | -1.95477921                   | -2.460589797                  | -2.163335881                  | -1.663744826                  | -1.206610568                  |
| -1.786322796                  | -2.909318966                  | -1.175639276                  | -2.775358322                  | -1.758902559                  | -2.678544201                  |



| log2ratio T/NL<br>186 | log2ratio T/NL<br>192 | log2ratio T/NL<br>196 | log2ratio T/NL<br>203 | log2ratio T/NL<br>210 | log2ratio T/NL<br>227 |
|-----------------------|-----------------------|-----------------------|-----------------------|-----------------------|-----------------------|
| 5.311776681           | 8.056498042           | 8.20250256            | 2.266167712           | 1.97321563            | 5.291358491           |
| -0.954402969          | 4.378665625           | 4.394609219           | 4.194860566           | -1.143527513          | 3.911177427           |
| 4.600664373           | 1.1972205             | 3.059219836           | 2.030279368           | -1.441176584          | 5.315394864           |
| 1.65363083            | 2.650397923           | 3.345348889           | 2.777926575           | 0.632980987           | 3.344165726           |
| 2.31763851            | 6.468513936           | 4.320692647           | 2.431837295           | -0.075552723          | 4.847025204           |
| 1.936664331           | 1.939228933           | 3.584685866           | 3.361472972           | 4.175465652           | 2.759314907           |
| 2.452485734           | 1.765648945           | 6.327678212           | 2.413717042           | 0.086876469           | -0.241066014          |
| 1.271454656           | 2.507853663           | 0.922510298           | 3.100717148           | -0.331443666          | 3.699629246           |
| 2.133981815           | -0.025290482          | 3.172064124           | 4.405955105           | 1.932359861           | 1.97307275            |
| 2.172847859           | 3.724006916           | 3.902449544           | 0.688157585           | -0.141877266          | 4.819064695           |
| 2.466098868           | 1.914004873           | 3.658353316           | 1.705956491           | 2.741932197           | 1.206817249           |
| 0.131014088           | 3.191078652           | 1.12052611            | 1.245201996           | -2.121713911          | 3.63699559            |
| 1.168264556           | 1.063277848           | 0.170083393           | 1.608672921           | 1.921347073           | 1.826834997           |
| 0.51898657            | 1.851691747           | 1.093351405           | 0.652533534           | 1.283524038           | 2.009656049           |
| -0.194067928          | 1.698846672           | -1.639272417          | -0.557330576          | 0.108933955           | 0.040158814           |
| 0.006349451           | 0.562428871           | 1.415049138           | -1.51235383           | 0.702096651           | 0.602603693           |
| 0.661028057           | 1.087985277           | 0.381586948           | -0.366253748          | 0.596636777           | 1.109660668           |
| 0.195385656           | 1.050749887           | -0.753332604          | -0.535475741          | 0.190739979           | 1.01263369            |
| -0.673427397          | -0.243133734          | 1.119762289           | 1.030653735           | -0.322841482          | -0.469099964          |
| 0.870681707           | -0.634424747          | 1.181896548           | 1.082367855           | 0.861536739           | 0.051434473           |
| 1.032629998           | -0.134873971          | -0.852570957          | 0.407036107           | 0.499465607           | 1.845321865           |
| -0.027236072          | 2.638429448           | -0.700801262          | 1.146709169           | -1.6893356            | 0.071454493           |
| 0.267452239           | -0.374398602          | 2.428032524           | 0.357296895           | -0.617490873          | 0.955102531           |
| 2.119135188           | 0.52240779            | 1.331212298           | -0.066667887          | 0.655542476           | 1.301705232           |
| 0.513125072           | 1.167540394           | -0.354062062          | -0.136981322          | 3.01504153            | 2.055436073           |
| 0.799641207           | 0.089900623           | 0.728395737           | -0.158131346          | 1.242319046           | 1.558268261           |
| 1.082191172           | 0.30218926            | 1.034757589           | -0.20446765           | 0.649863948           | 0.975288264           |
| 0.747958287           | -0.369341312          | 0.994466473           | -0.649301723          | 1.036846413           | 0.019734578           |
| -0.077568474          | 0.092699199           | -0.899435477          | 0.270781952           | 0.701941284           | -0.28014665           |
| 0.005307521           | 1.063952819           | -0.66341619           | 0.634574707           | 0.106998667           | 0.302351849           |
| 0.111035448           | -0.109864543          | -0.813147845          | -1.25928243           | 0.024213281           | 0.458887539           |
| -1.538499142          | 0.008174258           | -3.818046508          | -3.371635897          | -2.112258998          | -1.56025804           |
| -0.614892543          | -3.40445581           | -3.367989025          | -1.159149875          | -1.057682715          | -3.373180161          |



|    | <b>log2ratio T/NL</b> |
|----|-----------------------|
| 1  |                       |
| 2  |                       |
| 3  | <b>228</b>            |
| 4  |                       |
| 5  | 5.417098742           |
| 6  | 0.147124333           |
| 7  | 0.639676757           |
| 8  | 2.356903617           |
| 9  | 5.910828251           |
| 10 |                       |
| 11 | 2.615814743           |
| 12 | 4.084894186           |
| 13 | 1.560439599           |
| 14 | 4.79817921            |
| 15 | 1.966208249           |
| 16 | 1.494516033           |
| 17 | 1.494516033           |
| 18 | -0.648762736          |
| 19 | 2.503394107           |
| 20 | 1.160637185           |
| 21 | -1.629699117          |
| 22 | 2.211982456           |
| 23 | 1.493397045           |
| 24 | -0.207028851          |
| 25 | 0.13658811            |
| 26 | 1.999227853           |
| 27 | 0.650291289           |
| 28 | -0.343520163          |
| 29 | 0.340008169           |
| 30 | 0.072807344           |
| 31 | 1.49155169            |
| 32 | 0.789312751           |
| 33 | -0.236337068          |
| 34 | -0.390771031          |
| 35 | 0.136795512           |
| 36 | 0.147124333           |
| 37 | -1.016387133          |
| 38 | -1.837195891          |
| 39 | -1.982777824          |
| 40 |                       |
| 41 |                       |
| 42 |                       |
| 43 |                       |
| 44 |                       |
| 45 |                       |
| 46 |                       |
| 47 |                       |
| 48 |                       |
| 49 |                       |
| 50 |                       |
| 51 |                       |
| 52 |                       |
| 53 |                       |
| 54 |                       |
| 55 |                       |
| 56 |                       |
| 57 |                       |
| 58 |                       |
| 59 |                       |
| 60 |                       |

**Table 4: TAM versus. N-TAM breakdown per cluster**

| Cluster ID | TAM Frequency | N-TAM Frequency | Sum  | TAM percent | N-TAM Percent |
|------------|---------------|-----------------|------|-------------|---------------|
| 0          | 279           | 1586            | 1865 | 15%         | 85%           |
| 1          | 907           | 563             | 1470 | 62%         | 38%           |
| 2          | 1273          | 31              | 1304 | 98%         | 2%            |
| 3          | 768           | 312             | 1080 | 71%         | 29%           |
| 4          | 45            | 972             | 1017 | 4%          | 96%           |
| 5          | 287           | 452             | 739  | 39%         | 61%           |
| 6          | 441           | 163             | 604  | 73%         | 27%           |
| 7          | 182           | 103             | 285  | 64%         | 36%           |

*Note: Each sample was randomly downsampled to the same number of cells passing qual*

1  
2  
3  
4  
5  
6  
7  
8  
9  
10  
11  
12  
13  
14  
15  
16  
17  
18  
19  
20  
21  
22  
23  
24  
25  
26  
27  
28  
29  
30  
31  
32  
33  
34  
35  
36  
37  
38  
39  
40  
41  
42  
43  
44  
45  
46  
47  
48  
49  
50  
51  
52  
53  
54  
55  
56  
57  
58  
59  
60

*lity control following clustering*

Confidential: For Review Only

**Table 4: 'Cluster 3 enriched transcripts'**

Differentially expressed genes (MAST &lt; 0.05) with concurrently directionality between T

| TAM enriched  | N-TAM enriched |
|---------------|----------------|
| CTD-2350C19.2 | FABP4          |
| GSDMA         | INHBA          |
| MYO10         | SERPING1       |
| REPS2         | MCEMP1         |
| PTPRN2        | DEFB1          |
| PDGFA         | C1QA           |
| BIRC7         | CXCL3          |
| CYB561A3      | SERPINA1       |
| MAOA          | C1QB           |
| S100B         | RND3           |
| HAAO          | STXBP2         |
| SH3RF1        | CRIP1          |
| HSD11B1       | UBB            |
| EMP2          | SCD            |
| ACSM5         | ALDH2          |
| FAM27C        | MME            |
| LPAR5         | AQP3           |
| ZNF703        | RETN           |
| TRERF1        | TCF7L2         |
| CHST15        | CXCL8          |
| RP11-556E13.1 | MRC1           |
| ZG16B         | ALOX5AP        |
| ST3GAL5       | BHLHE41        |
| NRIP3         | LGALS3BP       |
| SRGAP3        | ARL4A          |
| SLC12A5       | RGCC           |
| ST18          | FBP1           |
| CADM1         | COX17          |
| C1orf21       | MIR3945HG      |
| ZNF618        | TREM1          |
| LY9           | PDLIM1         |
| CCND2         | CES1           |
| HRH2          | S100A13        |
| RNU11         | FN1            |
| SRGAP1        | PPARG          |
| TMEM71        | HBEGF          |
| AK4           | B3GNT5         |
| SYNE3         | IGFBP2         |
| RGAG4         | LRRFIP1        |
| CRIP2         | CEBPB          |
| GNG2          | THBS1          |
| ACOT11        | SPATS2L        |
| COL4A2-AS2    | GPATCH11       |
| STK26         | PLA2G16        |
| ALOX15B       | CXCL16         |
| SYNE1         | RNF149         |

<https://jitc.bmj.com>

|    |             |  |             |
|----|-------------|--|-------------|
| 1  |             |  |             |
| 2  | MRC2        |  | LPL         |
| 3  | L3MBTL4-AS1 |  | MTPN        |
| 4  | LRMP        |  | CARD16      |
| 5  | PTPN7       |  | ANXA1       |
| 6  | CHST13      |  | RP5-839B4.8 |
| 7  | C9orf91     |  | ABCG1       |
| 8  | HSPA8       |  | LY6E        |
| 9  | TPCN1       |  | ALOX5       |
| 10 |             |  | SEPT11      |
| 11 | ADAMDEC1    |  | VMO1        |
| 12 | AC133644.2  |  | CXCL5       |
| 13 | FAM101B     |  | SPN         |
| 14 | DYSF        |  | GLIPR2      |
| 15 | PXN         |  | ACO1        |
| 16 | IGF2BP2     |  | GLDN        |
| 17 | MGME1       |  | POR         |
| 18 | RPLP1       |  | RAB11FIP1   |
| 19 | SPHK1       |  | THBD        |
| 20 | SLAMF7      |  | PPIC        |
| 21 | GAS6        |  | SVIL        |
| 22 | HIST1H1D    |  | CD52        |
| 23 | BATF        |  | TUBA1B      |
| 24 | FZD1        |  | ALDOA       |
| 25 | CYP2S1      |  | APIP        |
| 26 | BCL2        |  | GCA         |
| 27 | IER5L       |  | TGM2        |
| 28 | SLC23A2     |  | ATP6V1E1    |
| 29 | S100A12     |  | PNPLA6      |
| 30 | FAM214A     |  | PCOLCE2     |
| 31 | ETV5        |  | ENPP4       |
| 32 | STAB1       |  | QSOX1       |
| 33 | BMF         |  | RHBDD2      |
| 34 | OAZ2        |  | PFDN2       |
| 35 | IL10        |  | MACC1       |
| 36 | CHD3        |  | TKT         |
| 37 | TRAF3IP3    |  | ATP2C1      |
| 38 | TRAF5       |  | TAGLN2      |
| 39 | HAUS1       |  | SPI1        |
| 40 | FGD6        |  | ABHD5       |
| 41 | CHKA        |  | MARCO       |
| 42 | PEAK1       |  | LCP1        |
| 43 | NME4        |  | ANKRD28     |
| 44 | PKIB        |  | HPGD        |
| 45 | TXNDC16     |  | DDX21       |
| 46 | INPP5D      |  | GYPC        |
| 47 | ALKBH7      |  | ADAM17      |
| 48 | PTGS1       |  | COMT        |
| 49 | GATM        |  | PYCARD      |
| 50 | FAM13A      |  | SGMS2       |
| 51 | MTSS1       |  |             |

|    |          |  |              |
|----|----------|--|--------------|
| 1  |          |  |              |
| 2  | STARD13  |  | LMNA         |
| 3  | SETDB2   |  | S100A4       |
| 4  | EVA1B    |  | PRR13        |
| 5  | TMEM163  |  | EML4         |
| 6  | F13A1    |  | LAMTOR1      |
| 7  | ECM1     |  | H2AFZ        |
| 8  | PXDC1    |  | EGR2         |
| 9  | ALK      |  | CD44         |
| 10 | NEK3     |  | FHL1         |
| 11 | P2RY11   |  | ADGRE5       |
| 12 | ATP8B4   |  | PTPN12       |
| 13 | PRDM1    |  | SPINT2       |
| 14 | SLC38A7  |  | NMB          |
| 15 | POU2F2   |  | LYAR         |
| 16 | APOBEC3A |  | DECR1        |
| 17 | RAB3D    |  | CD69         |
| 18 | IL1R1    |  | GPD1         |
| 19 | SPTBN1   |  | AMIGO2       |
| 20 | TBC1D2B  |  | CD55         |
| 21 | CCR5     |  | FAM89A       |
| 22 | ARHGAP12 |  | MYL12A       |
| 23 | GPAT3    |  | PHLDA3       |
| 24 | KLHL5    |  | CD151        |
| 25 | PTGER2   |  | TXN          |
| 26 | CA11     |  | LIMA1        |
| 27 | SULF2    |  | ATP1B1       |
| 28 | CLEC10A  |  | IFI27        |
| 29 | YPEL3    |  | DOCK8        |
| 30 | SLC9A9   |  | CPE          |
| 31 | MAX      |  | RP11-284N8.3 |
| 32 | SLC25A37 |  | OSCAR        |
| 33 | ST6GAL1  |  | OLR1         |
| 34 | KCNJ5    |  | EVL          |
| 35 | CD93     |  | SUN2         |
| 36 | CCL13    |  | IL1RN        |
| 37 | RFTN1    |  | NSRP1        |
| 38 | TFEB     |  | SECTM1       |
| 39 | TMEM192  |  | ARRDC4       |
| 40 | CLCN7    |  | ACOT7        |
| 41 | FAM20A   |  | CDC37        |
| 42 | TRMT1    |  | ECH1         |
| 43 | TAGAP    |  | HLA-DRB5     |
| 44 | TMEM55A  |  | MOB3B        |
| 45 | ANO6     |  | FLNA         |
| 46 | PTMA     |  | CYB5R3       |
| 47 | CD72     |  | ADAMTSL4     |
| 48 | OLFML2B  |  | S100A6       |
| 49 | ZNF292   |  | SELPLG       |
| 50 | SERPINE1 |  | RAC2         |

|    |              |  |          |
|----|--------------|--|----------|
| 1  |              |  |          |
| 2  | CUX1         |  | RUNX1    |
| 3  | CMKLR1       |  | AGRP     |
| 4  | HMHA1        |  | FPR2     |
| 5  | KDM7A        |  | CFDP1    |
| 6  | RP11-69E11.4 |  | TMEM173  |
| 7  | RPS2         |  | PAG1     |
| 8  | ANKRD29      |  | MSR1     |
| 9  | MXI1         |  | DSTN     |
| 10 | IDH2         |  | VSIG4    |
| 11 | HPS3         |  | PGD      |
| 12 | G0S2         |  | TPT1     |
| 13 | RPL10        |  | CCL20    |
| 14 | MRPS6        |  | FDFT1    |
| 15 | UQCRC2       |  | YWHAH    |
| 16 | SLC26A11     |  | UBASH3B  |
| 17 | MBNL2        |  | VASP     |
| 18 | GPR155       |  | CCND3    |
| 19 | MATK         |  | HMGN2    |
| 20 | RPL27A       |  | ARPC1B   |
| 21 | ADAM8        |  | HIPK2    |
| 22 | ADAM28       |  | PTPN6    |
| 23 | SDSL         |  | REEP3    |
| 24 | AMDHD2       |  | GNB2     |
| 25 | RPL13A       |  | UPP1     |
| 26 | SPECC1       |  | AKR1C3   |
| 27 | GLA          |  | NDUFV2   |
| 28 | DNAJC5B      |  | FBXL5    |
| 29 | CD300A       |  | IDS      |
| 30 | RPS28        |  | RTF1     |
| 31 | PDE7A        |  | PLAC8    |
| 32 | MREG         |  | ITGB8    |
| 33 | RPS12        |  | TCEAL3   |
| 34 | SNAP23       |  | PKM      |
| 35 | WDR70        |  | TSPAN3   |
| 36 | DCK          |  | SAP18    |
| 37 | NBPF14       |  | EFHD2    |
| 38 | MMP2         |  | ARL6IP1  |
| 39 | TRPM2        |  | HLA-DRB1 |
| 40 | TMEM37       |  | TSPO     |
| 41 | TMEM87B      |  | GGA2     |
| 42 | UBAC2        |  | STX11    |
| 43 | GALNT7       |  | HEATR5B  |
| 44 | DOCK5        |  | CLIC1    |
| 45 | RHOC         |  | BSG      |
| 46 | ARMCX1       |  | CAT      |
| 47 | AP001055.6   |  | KAT8     |
| 48 | NUCB2        |  | TRPV2    |
| 49 | HTRA4        |  | CDC42EP3 |
| 50 | GABARAP      |  | GRN      |

|    |              |  |              |
|----|--------------|--|--------------|
| 1  |              |  |              |
| 2  | SMPDL3A      |  | ACER3        |
| 3  | PFKFB3       |  | RASAL2       |
| 4  | CD2AP        |  | PTMS         |
| 5  | PAPSS2       |  | IL1RAP       |
| 6  | SCARB1       |  | DENND5A      |
| 7  | NAF1         |  | MLPH         |
| 8  | NBPF19       |  | AGFG1        |
| 9  | PLBD2        |  | CETN2        |
| 10 |              |  |              |
| 11 | RAD51AP1     |  | RP11-598F7.3 |
| 12 | TMIGD3       |  | BLVRA        |
| 13 | AMPD3        |  | NDUFB1       |
| 14 | ARHGEF40     |  | C19orf43     |
| 15 | RP11-160E2.6 |  | DIAPH1       |
| 16 | CDS2         |  | CSTA         |
| 17 | GOLGA4       |  | MYADM        |
| 18 | SATB1        |  | NPTN         |
| 19 | ANXA6        |  | OASL         |
| 20 | DFNA5        |  | TOMM5        |
| 21 | IFNAR2       |  | ACTN4        |
| 22 | HELZ         |  | CD74         |
| 23 | CYTL1        |  | FCGRT        |
| 24 | SRPK2        |  | LPTM5        |
| 25 | PIK3IP1      |  | CLDN7        |
| 26 | RPS15A       |  | LSAMP        |
| 27 | MMP12        |  | RPL36AL      |
| 28 | GAS7         |  | MYO6         |
| 29 | ANKH         |  | CYB5A        |
| 30 | NLN          |  | NNMT         |
| 31 | RPL26        |  | ACADVL       |
| 32 | CD180        |  | MYH9         |
| 33 | UBE2E1       |  | AES          |
| 34 | WDR11        |  | ATF4         |
| 35 | ARID3A       |  | COLEC12      |
| 36 | LACC1        |  | RTN3         |
| 37 | SGTB         |  | CKS1B        |
| 38 | RPS13        |  | EPAS1        |
| 39 | ISCA2        |  | STAC         |
| 40 | GIMAP4       |  | RBP4         |
| 41 | HOMER3       |  | FNDC3B       |
| 42 | SGPL1        |  | BATF3        |
| 43 | DIP2A        |  | ALAS1        |
| 44 | CST6         |  | JAML         |
| 45 | NREP         |  | ISG15        |
| 46 | SNX29        |  | MRPL55       |
| 47 | PALLD        |  | RPS20        |
| 48 | DNMT1        |  | RARA         |
| 49 | NUP62        |  | NDUFS5       |
| 50 | STK38L       |  | CD58         |
| 51 | CREBRF       |  | OSBPL11      |



|    |           |  |          |
|----|-----------|--|----------|
| 1  |           |  |          |
| 2  | ANTXR2    |  | SLFN11   |
| 3  | BLNK      |  | HCAR2    |
| 4  | PMFBP1    |  | STX12    |
| 5  | PLXND1    |  | MYL12B   |
| 6  | KLHL24    |  | TMED5    |
| 7  | CAMK1     |  | EIF6     |
| 8  | RBP1      |  | SREK1IP1 |
| 9  | RAB42     |  | CDC42    |
| 10 | MCOLN3    |  | DST      |
| 11 | ZNF385A   |  | ERAP2    |
| 12 | WIP1      |  | HP       |
| 13 | ELK3      |  | DOK2     |
| 14 | LRRK2     |  | SLC7A8   |
| 15 | IGFBP7    |  | CDC42BPB |
| 16 | ABCC5     |  | VDAC2    |
| 17 | CCL8      |  | IGF1     |
| 18 | TXNL1     |  | MSN      |
| 19 | MACF1     |  | HMOX2    |
| 20 | ABI3      |  | TRGC1    |
| 21 | ACBD3     |  | CYSLTR1  |
| 22 | LINC01010 |  | TLR4     |
| 23 | VCL       |  | TLCD2    |
| 24 | RNF145    |  | BRD2     |
| 25 | IL6R      |  | RAD23B   |
| 26 | ENTPD1    |  | TMEM14A  |
| 27 | IFI30     |  | RGS19    |
| 28 | MMP9      |  | LAT2     |
| 29 | CHD4      |  | DERL1    |
| 30 | RGL1      |  | TANC2    |
| 31 | CAPZB     |  | PNPLA2   |
| 32 | CTTNBP2NL |  | TNNI2    |
| 33 | CDK6      |  | TBC1D9   |
| 34 | RPL35     |  | GCC2     |
| 35 | MYO5A     |  | NT5C3A   |
| 36 | RPS6      |  | SIRPB1   |
| 37 | CMTM7     |  | RASGRP2  |
| 38 | CISD2     |  | ITIH5    |
| 39 | ADORA3    |  | RASSF5   |
| 40 | TPST2     |  | CD300LF  |
| 41 | ERO1A     |  | PECAM1   |
| 42 | TCN2      |  | SLC6A6   |
| 43 | TNFRSF21  |  | SPRY1    |
| 44 | SLC18B1   |  | ANOS1    |
| 45 | ABHD12    |  | DCTN6    |
| 46 | LIMD2     |  | PAPSS1   |
| 47 | FXD6      |  | MT-ND2   |
| 48 | PLEKHA2   |  | FTH1     |
| 49 | TSPAN4    |  | YWHAG    |
| 50 | TLE3      |  | ZMAT2    |

|    |            |  |           |
|----|------------|--|-----------|
| 1  |            |  |           |
| 2  | RPS24      |  | TRIQK     |
| 3  | WWP1       |  | OPN3      |
| 4  | PHF20L1    |  | GPA33     |
| 5  | RENBP      |  | ARHGEF28  |
| 6  | ATP6V1C1   |  | TMC6      |
| 7  | RPS8       |  | CORO2A    |
| 8  | CCL7       |  | HMGB1     |
| 9  | RSRP1      |  | PER2      |
| 10 | PREX1      |  | NCF4      |
| 11 | EPB41L2    |  | SLC19A3   |
| 12 | HS3ST2     |  | CGGBP1    |
| 13 | QPCT       |  | CAPZA2    |
| 14 | NGFRAP1    |  | POLD3     |
| 15 | GLMP       |  | CD46      |
| 16 | GAL3ST4    |  | ATP10A    |
| 17 | TIMP3      |  | GAA       |
| 18 | DOCK4      |  | MMP24-AS1 |
| 19 | AC079767.4 |  | SLC27A3   |
| 20 | FAM105A    |  | TXNIP     |
| 21 | PPP1CC     |  | MGAT3     |
| 22 | PQLC3      |  | DDAH2     |
| 23 | DICER1     |  | WDR1      |
| 24 | SLC39A11   |  | MYL6      |
| 25 | TNFRSF1B   |  | NECAP2    |
| 26 | RNASE2     |  | AGPAT2    |
| 27 | GADD45G    |  | SELM      |
| 28 | JARID2     |  | TMEM74B   |
| 29 | EMB        |  | FFAR4     |
| 30 | HNRNPU-AS1 |  | ANXA11    |
| 31 | VMA21      |  | RAC1      |
| 32 | NINJ1      |  | IL1A      |
| 33 | RPL41      |  | TMBIM1    |
| 34 | LILRB2     |  | RSPO3     |
| 35 | LILRB3     |  | ZMPSTE24  |
| 36 | RASSF4     |  | LARP4     |
| 37 | TCF4       |  | PLBD1     |
| 38 | SLC36A1    |  | MYD88     |
| 39 | NRP2       |  | DDA1      |
| 40 | CLEC5A     |  | BTK       |
| 41 | SWAP70     |  | ADGRE3    |
| 42 | RPL23A     |  | GALNT12   |
| 43 | PHACTR4    |  | MAN1A1    |
| 44 | DCAF7      |  | SKIL      |
| 45 | RPS27A     |  | APOBR     |
| 46 | RPS9       |  | TUBB4B    |
| 47 | MTCH2      |  | PROS1     |
| 48 | JAK1       |  | NUS1      |
| 49 | MYCBP2     |  | PAFAH1B2  |
| 50 | SET        |  | CDCP1     |

|    |             |  |             |
|----|-------------|--|-------------|
| 1  |             |  |             |
| 2  | DYNLT1      |  | G3BP2       |
| 3  | GIMAP7      |  | MS4A7       |
| 4  | NCOA4       |  | KIAA1147    |
| 5  | P2RX7       |  | EEF1A1      |
| 6  | FCN1        |  | FOLR3       |
| 7  | RPL21       |  | PDCD6IP     |
| 8  | TDP2        |  | SEPT9       |
| 9  | TNS3        |  | USP25       |
| 10 | METTL7A     |  | UNC5B       |
| 11 | CD86        |  | HIPK1       |
| 12 | LPAR6       |  | ADGRE1      |
| 13 | MT-ND4      |  | NUP107      |
| 14 | UTRN        |  | UBA1        |
| 15 | PEA15       |  | FAM134B     |
| 16 | ST8SIA4     |  | STMN1       |
| 17 | ENO1        |  | SLC3A2      |
| 18 | ADAP2       |  | SERTAD1     |
| 19 | MIR4435-2HG |  | TBC1D10C    |
| 20 | ATF5        |  | ARF6        |
| 21 | ATP6V0A1    |  | ATL1        |
| 22 | FMN1        |  | MSMO1       |
| 23 | CHPT1       |  | GPRIN3      |
| 24 | APP         |  | ITPK1       |
| 25 | HGF         |  | TRGC2       |
| 26 | SLC4A7      |  | TUBB6       |
| 27 | PRDX1       |  | PCMT1       |
| 28 | IRF2BP2     |  | MYCBP       |
| 29 | AP1B1       |  | RNPEPL1     |
| 30 | RCSD1       |  | FKBP1A      |
| 31 | FAM20C      |  | STON1       |
| 32 | SLC40A1     |  | USP30-AS1   |
| 33 | GALM        |  | ACKR3       |
| 34 | DHRS9       |  | MSRB1       |
| 35 | KIAA0930    |  | SLAIN2      |
| 36 | SH3KBP1     |  | GS1-600G8.5 |
| 37 | SEP15       |  | CMPK1       |
| 38 | ATP6V1B2    |  | HAUS2       |
| 39 | PAK1        |  | TMEM128     |
| 40 | MMP14       |  | DTX4        |
| 41 | IL411       |  | B3GNT7      |
| 42 | RGS18       |  | RP5-884M6.1 |
| 43 | SGK3        |  | USP32       |
| 44 | SLAMF8      |  | HP1BP3      |
| 45 | NOTCH2      |  | ACVRL1      |
| 46 | CYBRD1      |  | ST3GAL2     |
| 47 | LILRB5      |  | DYX1C1      |
| 48 | LGALS2      |  | CD101       |
| 49 | EEF1B2      |  | ZNF800      |
| 50 | TMEM50A     |  | PHTF2       |

|    |          |  |             |
|----|----------|--|-------------|
| 1  |          |  |             |
| 2  | CREBL2   |  | ARHGAP6     |
| 3  | ARL4C    |  | SLC44A2     |
| 4  | RNASEH2B |  | PARP9       |
| 5  | FAM49B   |  | GNB1        |
| 6  | NAIP     |  | MPZL2       |
| 7  | FOLR2    |  | VIM-AS1     |
| 8  | CTSS     |  | HMCES       |
| 9  | CMTM3    |  | TRHDE       |
| 10 | GGCT     |  | OPTN        |
| 11 | AP2A2    |  | ICAM2       |
| 12 | RPS10    |  | SPOCD1      |
| 13 | ITGAM    |  | MMD         |
| 14 | RASGRP3  |  | SIK2        |
| 15 | TPM4     |  | CSNK1A1     |
| 16 | SERINC5  |  | PRSS21      |
| 17 | TMEM107  |  | RP6-159A1.4 |
| 18 | HAVCR2   |  | FGD5        |
| 19 | SNX6     |  | VGLL3       |
| 20 | MPP1     |  | SAMD9L      |
| 21 | ME2      |  | ITSN1       |
| 22 | CTSK     |  | EPB41L4A    |
| 23 | CSF3R    |  | TNF         |
| 24 | OSBPL8   |  | CCL23       |
| 25 | CHST11   |  | ADRBK2      |
| 26 | QKI      |  | HK3         |
| 27 | MERTK    |  | ZNFX1       |
| 28 | FAM198B  |  | MINK1       |
| 29 | C1orf54  |  | FAR2        |
| 30 | ATP1B3   |  | CLIC4       |
| 31 | TNS1     |  | STIM1       |
| 32 | CHI3L1   |  | TUBA1A      |
| 33 | ZNF331   |  | NCSTN       |
| 34 | ATP6V0E1 |  | TXNRD2      |
| 35 | RASSF2   |  | PROCR       |
| 36 | IFNAR1   |  | CSRP1       |
| 37 | NAGK     |  | HCAR3       |
| 38 | CHCHD6   |  | RFX2        |
| 39 | UCP2     |  | TRPC6       |
| 40 | WIPF1    |  | ATP1A1      |
| 41 | PRKCB    |  | ADRBK1      |
| 42 | CSF1R    |  | APBB2       |
| 43 | CPVL     |  | INTS6       |
| 44 | RPS17    |  | IKZF2       |
| 45 | ZFYVE16  |  | FLOT2       |
| 46 | SDS      |  | MT-ND3      |
| 47 | MAP3K2   |  | AKAP5       |
| 48 | TLR5     |  | KLHL2       |
| 49 | SCARB2   |  | KSR1        |
| 50 | ATOX1    |  | MSRA        |

|    |               |  |            |
|----|---------------|--|------------|
| 1  |               |  |            |
| 2  | CCL3L3        |  | PDCL       |
| 3  | SNCA          |  | ARMC8      |
| 4  | RP11-24F11.2  |  | PKIA       |
| 5  | RPL10A        |  | EHD1       |
| 6  | MGAT4A        |  | TMEM53     |
| 7  | SAT1          |  | ECSCR.1    |
| 8  | MTHFD2        |  | MORF4L1    |
| 9  | EIF4A3        |  | RPS27L     |
| 10 | SORL1         |  | FOLR1      |
| 11 | IGSF6         |  | RAB11FIP4  |
| 12 | HSPE1         |  | AMFR       |
| 13 | GNPDA1        |  | IQSEC3     |
| 14 | LINC00152     |  | HEXIM1     |
| 15 | SLC25A5       |  | COLGALT1   |
| 16 | ATP13A3       |  | MFSD10     |
| 17 | RPL22L1       |  | TRIM25     |
| 18 | PLTP          |  | CEP44      |
| 19 | IQGAP2        |  | SAMM50     |
| 20 | HM13          |  | ADIPOR2    |
| 21 | MT-ATP6       |  | FLVCR2     |
| 22 | HSBP1         |  | SFTPC      |
| 23 | FCHO2         |  | PEX19      |
| 24 | BMP2K         |  | CENPV      |
| 25 | ARL5A         |  | GNG12      |
| 26 | GPR34         |  | PNP        |
| 27 | RALA          |  | KIAA0368   |
| 28 | CORO1A        |  | CACNB3     |
| 29 | DMXL2         |  | PLEC       |
| 30 | PRCP          |  | RARA-AS1   |
| 31 | RPL7          |  | MLF1       |
| 32 | KDELRL2       |  | CATSPER1   |
| 33 | DRAM2         |  | MTMR12     |
| 34 | FCGR2B        |  | AC011899.9 |
| 35 | ABCA1         |  | TMSB4X     |
| 36 | FGL2          |  | FAM214B    |
| 37 | CREG1         |  | PDGFD      |
| 38 | EVI2A         |  | CHD7       |
| 39 | TTYH3         |  | MAPK7      |
| 40 | CH17-373J23.1 |  | ZDHHC3     |
| 41 | CAPG          |  | ATG16L2    |
| 42 | RAB32         |  | CTSW       |
| 43 | SUB1          |  | PELI3      |
| 44 | CD14          |  | MAN2B2     |
| 45 | PLEKHO1       |  | TRIM28     |
| 46 | DNPH1         |  | GATA3      |
| 47 | NAP1L1        |  | F11R       |
| 48 | C4orf3        |  | C8B        |
| 49 | RP11-386114.4 |  | PTGER3     |
| 50 | SEPP1         |  | FRMD4A     |
| 51 |               |  |            |
| 52 |               |  |            |
| 53 |               |  |            |
| 54 |               |  |            |
| 55 |               |  |            |
| 56 |               |  |            |
| 57 |               |  |            |
| 58 |               |  |            |
| 59 |               |  |            |
| 60 |               |  |            |

|    |          |  |               |
|----|----------|--|---------------|
| 1  |          |  |               |
| 2  | ATP6AP2  |  | DHCR24        |
| 3  | CHMP1B   |  | MDK           |
| 4  | FUCA1    |  | PARP10        |
| 5  | ADAM9    |  | CARS2         |
| 6  | KCNMA1   |  | KLHL29        |
| 7  | RNF13    |  | RP11-384F7.2  |
| 8  | GM2A     |  | KCNA3         |
| 9  | EPSTI1   |  | AKR1C2        |
| 10 | PLPP3    |  | ALPK3         |
| 11 | SLC38A6  |  | CTD-2135D7.5  |
| 12 | HERPUD1  |  | CYBA          |
| 13 | PDIA3    |  | BCAR1         |
| 14 | TMEM70   |  | RC3H1         |
| 15 | RPS3A    |  | TBC1D4        |
| 16 | CLEC2B   |  | PELO          |
| 17 | SSR4     |  | OR2A1-AS1     |
| 18 | NPM1     |  | SIDT2         |
| 19 | ITGB2    |  | AKT3          |
| 20 | HNRNPU   |  | UTP23         |
| 21 | BCAT1    |  | ICOS          |
| 22 | CALR     |  | C1orf228      |
| 23 | TNFSF13B |  | NLK           |
| 24 | PPT1     |  | CLIP4         |
| 25 | LHFPL2   |  | ATN1          |
| 26 | RARRES1  |  | KCNQ1         |
| 27 | PABPC4   |  | MYB           |
| 28 | NEAT1    |  | RAB1B         |
| 29 | RPL36A   |  | GPR153        |
| 30 | BASP1    |  | PPP2R3A       |
| 31 | PRMT9    |  | EPN2          |
| 32 | LILRB4   |  | PVR           |
| 33 | PLXNC1   |  | AOC3          |
| 34 | CD59     |  | HMGCR         |
| 35 | SLC1A3   |  | RP13-143G15.4 |
| 36 | MALAT1   |  | EPB41L1       |
| 37 | NR4A2    |  | CYFIP2        |
| 38 | CYP1B1   |  | S100P         |
| 39 | OSTC     |  | PGM1          |
| 40 | CTSA     |  | OSBPL10       |
| 41 | CCR1     |  | ANGPT4        |
| 42 | FNIP2    |  | SIGLEC11      |
| 43 | NPL      |  | GTPBP2        |
| 44 | SOAT1    |  | CD5L          |
| 45 | WBP5     |  | AWAT2         |
| 46 | CALM3    |  | BPNT1         |
| 47 | SEC61G   |  | OVCH1         |
| 48 | AP2S1    |  | NEIL2         |
| 49 | MAF      |  | ANGPT2        |
| 50 | GPX1     |  | ANO5          |

|    |          |  |               |
|----|----------|--|---------------|
| 1  |          |  |               |
| 2  | CECR1    |  | PCED1B        |
| 3  | TPP1     |  | ARHGEF35      |
| 4  | BLVRB    |  | CHRM3         |
| 5  | PSAP     |  | AMOTL1        |
| 6  | GNB4     |  | ODF3L1        |
| 7  | FOS      |  | ATP6AP1L      |
| 8  | CTSZ     |  | SMYD2         |
| 9  | ID2      |  | CDC42EP4      |
| 10 | FRMD4B   |  | AR            |
| 11 | PMP22    |  | RP11-246K15.1 |
| 12 | RAP2B    |  | CLCN4         |
| 13 | RGS10    |  | KAZN          |
| 14 | HLA-DMB  |  | LIMS2         |
| 15 | IFI16    |  | ZNF788        |
| 16 | SMS      |  | CD3D          |
| 17 | LIMS1    |  | CRACR2B       |
| 18 | HAMP     |  | ENPP5         |
| 19 | LGALS1   |  | FGF10         |
| 20 | CD48     |  | IGSF22        |
| 21 | MEF2C    |  | A4GALT        |
| 22 | GLIPR1   |  | HOXB6         |
| 23 | GPR183   |  | ARHGEF5       |
| 24 | RNF130   |  | RASSF8-AS1    |
| 25 | FOSB     |  | PYGB          |
| 26 | PDIA6    |  | ZBTB7C        |
| 27 | CD84     |  |               |
| 28 | A2M      |  |               |
| 29 | HIF1A    |  |               |
| 30 | ZEB2     |  |               |
| 31 | IFITM3   |  |               |
| 32 | MAFB     |  |               |
| 33 | PLA2G7   |  |               |
| 34 | FYB      |  |               |
| 35 | FAM96A   |  |               |
| 36 | EMP1     |  |               |
| 37 | ASAH1    |  |               |
| 38 | PLD3     |  |               |
| 39 | RGS2     |  |               |
| 40 | CPM      |  |               |
| 41 | SDC2     |  |               |
| 42 | C15orf48 |  |               |
| 43 | MFSD1    |  |               |
| 44 | H2AFY    |  |               |
| 45 | LY96     |  |               |
| 46 | CHIT1    |  |               |
| 47 | CD36     |  |               |
| 48 | MS4A4A   |  |               |
| 49 | OTOA     |  |               |
| 50 | CTSB     |  |               |

1  
2  
3  
4  
5  
6  
7  
8  
9  
10  
11  
12  
13  
14  
15  
16  
17  
18  
19  
20  
21  
22  
23  
24  
25  
26  
27  
28  
29  
30  
31  
32  
33  
34  
35  
36  
37  
38  
39  
40  
41  
42  
43  
44  
45  
46  
47  
48  
49  
50  
51  
52  
53  
54  
55  
56  
57  
58  
59  
60

|         |  |  |  |
|---------|--|--|--|
| APOE    |  |  |  |
| RNASE6  |  |  |  |
| AP1S2   |  |  |  |
| NPC2    |  |  |  |
| CCL18   |  |  |  |
| CCL3    |  |  |  |
| FPR3    |  |  |  |
| ZFP36L1 |  |  |  |
| RNASE1  |  |  |  |
| MS4A6A  |  |  |  |
| TREM2   |  |  |  |
| GPNMB   |  |  |  |
| CCL2    |  |  |  |
| SGK1    |  |  |  |
| RGS1    |  |  |  |
| LIPA    |  |  |  |
| MARCKS  |  |  |  |
| LGMN    |  |  |  |
| SPP1    |  |  |  |

Confidential: For Review Only



1  
2  
3  
4  
5  
6  
7  
8  
9  
10  
11  
12  
13  
14  
15  
16  
17  
18  
19  
20  
21  
22  
23  
24  
25  
26  
27  
28  
29  
30  
31  
32  
33  
34  
35  
36  
37  
38  
39  
40  
41  
42  
43  
44  
45  
46  
47  
48  
49  
50  
51  
52  
53  
54  
55  
56  
57  
58  
59  
60

TAM and N-TAM enriched clusters

Confidential: For Review Only

**Table 4: Percentage cells expressing given gene in each cluster**

|         | Cluster 0 | Cluster 1 | Cluster 2 | Cluster 3 | Cluster 4 | Cluster 5 |
|---------|-----------|-----------|-----------|-----------|-----------|-----------|
| LGMN    | 3.41      | 13.02     | 60.73     | 35.67     | 5.80      | 6.06      |
| SPP1    | 1.63      | 8.68      | 56.53     | 19.25     | 0.80      | 7.17      |
| TMEM74B | 5.95      | 3.43      | 0.23      | 0.71      | 4.91      | 0.49      |
| FABP4   | 91.89     | 64.44     | 9.55      | 14.73     | 95.09     | 12.73     |
| CXCL9   | 0.24      | 1.30      | 1.22      | 25.73     | 1.61      | 2.72      |
| CXCL10  | 0.58      | 1.23      | 1.83      | 19.61     | 3.93      | 4.08      |

Note: cluster 7 comprised of cycling cells, consequently was removed from further analysis

1  
2  
3  
4  
5  
6  
7  
8  
9  
10  
11  
12  
13  
14  
15  
16  
17  
18  
19  
20  
21  
22  
23  
24  
25  
26  
27  
28  
29  
30  
31  
32  
33  
34  
35  
36  
37  
38  
39  
40  
41  
42  
43  
44  
45  
46  
47  
48  
49  
50  
51  
52  
53  
54  
55  
56  
57  
58  
59  
60

| Cluster 6 | Cluster 7 |
|-----------|-----------|
| 9.02      | 21.14     |
| 12.56     | 24.16     |
| 0.16      | 3.69      |
| 6.92      | 60.74     |
| 5.80      | 0.67      |
| 6.12      | 3.02      |

| Median of remaining clusters (excluding 7) |
|--------------------------------------------|
| 9.02                                       |
| 8.68                                       |
| 0.49                                       |
| 12.73                                      |
| 2.72                                       |
| 4.08                                       |

/sis

**Table 4: 'Cluster 3 enriched transcripts'**

| Gene symbol | log2 fold change versus cluster(0) | log2 fold change versus cluster(1) | log2 fold change versus cluster(2) | log2 fold change versus cluster(4) |
|-------------|------------------------------------|------------------------------------|------------------------------------|------------------------------------|
| HSPA1A      | 4.08                               | 3.78                               | 4.51                               | 2.91                               |
| B2M         | 0.62                               | 0.56                               | 0.61                               | 0.40                               |
| SLC40A1     | 2.18                               | 2.12                               | 1.63                               | 2.20                               |
| HSPA1B      | 5.08                               | 4.77                               | 5.18                               | 4.19                               |
| SOD2        | 5.68                               | 4.72                               | 4.55                               | 4.41                               |
| HLA-A       | 0.80                               | 1.64                               | 0.76                               | 0.69                               |
| SEPP1       | 2.17                               | 2.13                               | 1.13                               | 2.15                               |
| ABCA1       | 2.54                               | 2.21                               | 1.59                               | 2.33                               |
| SDC3        | 1.23                               | 1.12                               | 1.07                               | 1.15                               |
| NFKBIA      | 3.15                               | 3.18                               | 3.99                               | 1.54                               |
| HSP90AA1    | 0.73                               | 1.18                               | 1.26                               | 1.16                               |
| TMEM176A    | 2.69                               | 2.65                               | 2.63                               | 2.59                               |
| TSC22D1     | 1.90                               | 2.27                               | 2.33                               | 1.56                               |
| EGR1        | 2.38                               | 2.06                               | 2.11                               | 1.47                               |
| TMEM176B    | 3.70                               | 3.53                               | 3.49                               | 3.52                               |
| CXCL9       | 2.60                               | 2.54                               | 2.53                               | 2.54                               |
| HSPB1       | 1.22                               | 1.48                               | 1.52                               | 0.65                               |
| CYFIP1      | 1.54                               | 1.52                               | 1.16                               | 1.25                               |
| SLC1A3      | 3.06                               | 3.01                               | 1.87                               | 2.54                               |
| SMPDL3A     | 1.47                               | 1.39                               | 1.21                               | 1.49                               |
| STAT1       | 3.50                               | 3.42                               | 2.78                               | 2.59                               |
| FOLR2       | 1.45                               | 1.43                               | 0.85                               | 1.42                               |
| CCL3        | 4.22                               | 3.49                               | 0.98                               | 3.22                               |
| SDCBP       | 1.08                               | 1.09                               | 0.77                               | 0.49                               |
| ATOX1       | 1.49                               | 1.77                               | 0.80                               | 2.16                               |
| SGK1        | 5.10                               | 3.51                               | 0.76                               | 3.83                               |
| MAFB        | 4.19                               | 3.47                               | 2.18                               | 3.25                               |
| HLA-B       | 0.28                               | 0.47                               | 0.29                               | 0.62                               |
| CXCL10      | 2.14                               | 2.10                               | 2.03                               | 1.89                               |
| PDK4        | 2.13                               | 1.20                               | 1.94                               | 0.58                               |
| HSPA5       | 1.25                               | 1.35                               | 1.16                               | 0.75                               |
| KCNMA1      | 1.87                               | 1.67                               | 0.91                               | 1.95                               |
| ATP1B3      | 1.81                               | 1.60                               | 1.11                               | 1.60                               |
| RAB20       | 0.93                               | 0.96                               | 0.87                               | 0.78                               |
| UBE2D1      | 1.05                               | 1.37                               | 0.92                               | 1.21                               |
| CREG1       | 1.80                               | 1.89                               | 0.96                               | 1.55                               |
| GBP1        | 1.35                               | 1.62                               | 1.87                               | 0.52                               |
| TSPAN4      | 1.05                               | 1.02                               | 0.70                               | 1.09                               |
| ARRDC3      | 1.43                               | 1.31                               | 1.24                               | 0.63                               |
| PFKFB3      | 1.80                               | 1.76                               | 1.51                               | 1.75                               |
| VAMP5       | 3.01                               | 2.42                               | 2.81                               | 2.63                               |

<https://jitc.bmj.com>

|    |          |      |      |      |      |
|----|----------|------|------|------|------|
| 1  |          |      |      |      |      |
| 2  | HERPUD1  | 3.56 | 3.06 | 2.51 | 3.38 |
| 3  | RGL1     | 1.04 | 0.99 | 0.68 | 1.05 |
| 4  | CTSL     | 1.08 | 1.75 | 0.83 | 0.88 |
| 5  | PABPC4   | 2.17 | 1.77 | 0.93 | 1.48 |
| 6  | JUNB     | 1.79 | 1.44 | 1.48 | 1.71 |
| 7  | CD14     | 2.26 | 2.12 | 1.22 | 2.40 |
| 8  | TYMP     | 3.22 | 2.17 | 2.24 | 1.96 |
| 9  | SNAP23   | 0.68 | 0.73 | 0.45 | 0.82 |
| 10 | DNAJB1   | 3.41 | 3.23 | 3.61 | 2.84 |
| 11 | ARL4C    | 3.73 | 3.42 | 3.14 | 3.54 |
| 12 | APOC2    | 0.76 | 0.81 | 0.76 | 0.59 |
| 13 | BNIP3L   | 1.13 | 0.95 | 0.94 | 1.12 |
| 14 | IER3     | 1.42 | 1.47 | 1.17 | 1.31 |
| 15 | CCL13    | 0.72 | 0.67 | 0.52 | 0.73 |
| 16 | MGAT1    | 1.90 | 1.66 | 1.06 | 1.21 |
| 17 | FNIP2    | 2.08 | 1.85 | 0.81 | 2.22 |
| 18 | ELL2     | 1.72 | 1.37 | 1.28 | 0.89 |
| 19 | SDS      | 1.38 | 1.31 | 0.65 | 1.38 |
| 20 | HSPH1    | 2.04 | 2.24 | 1.97 | 2.18 |
| 21 | ZFAND5   | 3.25 | 3.05 | 3.34 | 2.13 |
| 22 | ICAM1    | 1.51 | 1.43 | 1.37 | 1.27 |
| 23 | NDFIP1   | 0.78 | 0.65 | 0.56 | 0.91 |
| 24 | GADD45B  | 2.75 | 2.15 | 1.92 | 1.74 |
| 25 | UGCG     | 0.96 | 1.07 | 0.65 | 0.74 |
| 26 | CECR1    | 2.27 | 1.70 | 0.85 | 1.59 |
| 27 | ADAMDEC1 | 1.02 | 1.02 | 0.91 | 1.04 |
| 28 | RARRES3  | 1.49 | 1.44 | 1.67 | 1.38 |
| 29 | EPSTI1   | 1.78 | 1.87 | 0.81 | 1.28 |
| 30 | KLF2     | 2.23 | 1.46 | 2.93 | 0.78 |
| 31 | ADM      | 1.66 | 1.67 | 1.63 | 1.60 |
| 32 | IL2RA    | 0.64 | 0.66 | 0.63 | 0.65 |
| 33 | NR1H3    | 0.62 | 0.49 | 0.45 | 0.68 |
| 34 | PTP4A1   | 0.93 | 0.84 | 0.90 | 0.39 |
| 35 | HLA-E    | 1.71 | 1.79 | 1.75 | 1.20 |
| 36 | ENPP2    | 1.11 | 1.10 | 1.08 | 1.11 |
| 37 | ACP2     | 0.56 | 0.49 | 0.37 | 0.49 |
| 38 | TNFAIP3  | 3.25 | 3.14 | 3.41 | 2.13 |
| 39 | CD38     | 0.61 | 0.56 | 0.56 | 0.61 |
| 40 | RASSF3   | 0.71 | 0.66 | 0.39 | 0.66 |
| 41 | CXCR4    | 4.79 | 3.94 | 3.15 | 3.34 |
| 42 | TNFRSF14 | 0.55 | 0.54 | 0.41 | 0.54 |
| 43 | TNFAIP2  | 1.02 | 0.88 | 1.11 | 1.02 |
| 44 | DNAJA4   | 0.68 | 0.74 | 0.73 | 0.60 |
| 45 | IL18BP   | 0.68 | 0.70 | 0.52 | 0.64 |
| 46 | HIF1A    | 4.22 | 3.49 | 2.37 | 3.22 |
| 47 | HLA-DMB  | 3.11 | 2.71 | 1.47 | 2.87 |
| 48 | DMXL2    | 1.43 | 1.19 | 0.55 | 1.10 |
| 49 | LILRB4   | 1.79 | 1.61 | 0.61 | 1.86 |
| 50 | CMKLR1   | 0.51 | 0.47 | 0.30 | 0.54 |

<https://jitc.bmj.com>

|    |          |      |      |      |      |
|----|----------|------|------|------|------|
| 1  |          |      |      |      |      |
| 2  | TGIF1    | 0.67 | 0.80 | 0.87 | 0.48 |
| 3  | ATF3     | 2.54 | 1.94 | 2.32 | 1.77 |
| 4  | FYB      | 3.47 | 2.64 | 1.40 | 3.04 |
| 5  | PNRC1    | 3.21 | 2.79 | 3.23 | 1.62 |
| 6  | ATF5     | 0.82 | 0.74 | 0.34 | 0.86 |
| 7  | CD4      | 1.08 | 0.99 | 0.71 | 0.53 |
| 8  | NRP2     | 0.92 | 0.69 | 0.48 | 0.89 |
| 9  | NINJ1    | 1.07 | 1.01 | 0.63 | 1.06 |
| 10 | CTSS     | 0.79 | 0.39 | 0.17 | 0.53 |
| 11 | CLK1     | 1.88 | 1.45 | 1.69 | 1.34 |
| 12 | CH25H    | 1.10 | 1.07 | 1.08 | 0.74 |
| 13 | MMP14    | 0.69 | 0.60 | 0.14 | 0.62 |
| 14 | ATP2A2   | 0.71 | 0.71 | 0.58 | 0.46 |
| 15 | CXCL12   | 0.15 | 0.15 | 0.14 | 0.15 |
| 16 | GBP5     | 0.75 | 0.73 | 0.82 | 0.60 |
| 17 | KCTD12   | 1.46 | 1.36 | 0.51 | 0.75 |
| 18 | GBP4     | 0.81 | 0.91 | 1.14 | 0.54 |
| 19 | GLA      | 0.45 | 0.52 | 0.22 | 0.58 |
| 20 | FMNL2    | 0.43 | 0.42 | 0.49 | 0.41 |
| 21 | CLEC4E   | 1.15 | 1.05 | 1.16 | 1.29 |
| 22 | HLA-F    | 0.47 | 0.71 | 0.97 | 0.47 |
| 23 | PIK3R1   | 0.82 | 0.65 | 0.45 | 0.65 |
| 24 | IFNGR1   | 0.90 | 0.93 | 0.53 | 0.17 |
| 25 | A2M      | 2.10 | 1.72 | 0.23 | 2.14 |
| 26 | LCP2     | 1.43 | 1.36 | 1.00 | 1.32 |
| 27 | DNAJB4   | 1.39 | 1.37 | 1.30 | 1.40 |
| 28 | FAM21A   | 0.47 | 0.45 | 0.40 | 0.43 |
| 29 | EIF4A3   | 1.20 | 1.18 | 0.41 | 1.27 |
| 30 | IL32     | 1.10 | 1.10 | 1.08 | 1.08 |
| 31 | MS4A6A   | 5.71 | 3.46 | 2.01 | 4.83 |
| 32 | SLAMF7   | 0.79 | 0.78 | 0.68 | 0.82 |
| 33 | CCL4L2   | 1.51 | 1.46 | 1.05 | 1.28 |
| 34 | NPL      | 1.74 | 1.59 | 0.46 | 1.59 |
| 35 | TNFSF13B | 2.33 | 1.70 | 1.28 | 2.00 |
| 36 | HSD11B1  | 0.29 | 0.26 | 0.23 | 0.31 |
| 37 | CXCL11   | 0.67 | 0.65 | 0.66 | 0.63 |
| 38 | RASSF4   | 1.20 | 1.15 | 0.77 | 1.24 |
| 39 | CYB561A3 | 0.25 | 0.32 | 0.20 | 0.33 |
| 40 | IQGAP2   | 1.31 | 1.18 | 0.49 | 1.35 |
| 41 | SLC16A10 | 0.68 | 0.57 | 0.37 | 0.16 |
| 42 | RB1      | 1.09 | 0.72 | 0.72 | 0.98 |
| 43 | PAPSS2   | 0.63 | 0.56 | 0.33 | 0.54 |
| 44 | PLIN2    | 2.71 | 3.31 | 2.44 | 0.45 |
| 45 | TPP1     | 1.69 | 1.42 | 0.33 | 1.59 |
| 46 | IGSF6    | 1.84 | 2.36 | 0.93 | 3.14 |
| 47 | TFDP2    | 0.27 | 0.34 | 0.27 | 0.33 |
| 48 | GCH1     | 0.43 | 0.32 | 0.42 | 0.36 |
| 49 | PMP22    | 1.80 | 1.44 | 0.24 | 1.47 |
| 50 | RHOQ     | 0.83 | 0.76 | 0.41 | 0.58 |

<https://jitc.bmj.com>

|    |            |      |      |      |      |
|----|------------|------|------|------|------|
| 1  |            |      |      |      |      |
| 2  | TBC1D2B    | 0.32 | 0.28 | 0.15 | 0.32 |
| 3  | TFEC       | 0.37 | 0.57 | 0.28 | 0.53 |
| 4  | HNRNPU     | 1.72 | 1.10 | 0.58 | 0.94 |
| 5  | ME1        | 0.32 | 0.31 | 0.35 | 0.22 |
| 6  | DUSP1      | 2.84 | 1.85 | 2.25 | 0.57 |
| 7  | MARCKS     | 5.21 | 4.60 | 0.22 | 5.10 |
| 8  | HNRNPU-AS1 | 0.73 | 0.64 | 0.27 | 0.72 |
| 9  | TRAM1      | 0.94 | 0.64 | 0.29 | 0.83 |
| 10 | IRF2BP2    | 1.16 | 1.20 | 0.63 | 1.15 |
| 11 |            |      |      |      |      |
| 12 |            |      |      |      |      |
| 13 |            |      |      |      |      |
| 14 |            |      |      |      |      |
| 15 |            |      |      |      |      |
| 16 |            |      |      |      |      |
| 17 |            |      |      |      |      |
| 18 |            |      |      |      |      |
| 19 |            |      |      |      |      |
| 20 |            |      |      |      |      |
| 21 |            |      |      |      |      |
| 22 |            |      |      |      |      |
| 23 |            |      |      |      |      |
| 24 |            |      |      |      |      |
| 25 |            |      |      |      |      |
| 26 |            |      |      |      |      |
| 27 |            |      |      |      |      |
| 28 |            |      |      |      |      |
| 29 |            |      |      |      |      |
| 30 |            |      |      |      |      |
| 31 |            |      |      |      |      |
| 32 |            |      |      |      |      |
| 33 |            |      |      |      |      |
| 34 |            |      |      |      |      |
| 35 |            |      |      |      |      |
| 36 |            |      |      |      |      |
| 37 |            |      |      |      |      |
| 38 |            |      |      |      |      |
| 39 |            |      |      |      |      |
| 40 |            |      |      |      |      |
| 41 |            |      |      |      |      |
| 42 |            |      |      |      |      |
| 43 |            |      |      |      |      |
| 44 |            |      |      |      |      |
| 45 |            |      |      |      |      |
| 46 |            |      |      |      |      |
| 47 |            |      |      |      |      |
| 48 |            |      |      |      |      |
| 49 |            |      |      |      |      |
| 50 |            |      |      |      |      |
| 51 |            |      |      |      |      |
| 52 |            |      |      |      |      |
| 53 |            |      |      |      |      |
| 54 |            |      |      |      |      |
| 55 |            |      |      |      |      |
| 56 |            |      |      |      |      |
| 57 |            |      |      |      |      |
| 58 |            |      |      |      |      |
| 59 |            |      |      |      |      |
| 60 |            |      |      |      |      |

1  
2  
3  
4  
5  
6  
7  
8  
9  
10  
11  
12  
13  
14  
15  
16  
17  
18  
19  
20  
21  
22  
23  
24  
25  
26  
27  
28  
29  
30  
31  
32  
33  
34  
35  
36  
37  
38  
39  
40  
41  
42  
43  
44  
45  
46  
47  
48  
49  
50  
51  
52  
53  
54  
55  
56  
57  
58  
59  
60

| log2 fold change versus cluster(5) | log2 fold change versus cluster(6) | Adjusted p value(0) | Adjusted p value(1) | Adjusted p value(2) | Adjusted p value(4) |
|------------------------------------|------------------------------------|---------------------|---------------------|---------------------|---------------------|
| 4.17                               | 3.24                               | 1.52E-141           | 1.30E-121           | 1.84E-137           | 1.02E-72            |
| 0.69                               | 0.88                               | 1.18E-127           | 4.26E-88            | 3.57E-94            | 1.19E-42            |
| 1.93                               | 1.75                               | 2.96E-119           | 2.79E-82            | 1.14E-32            | 1.23E-76            |
| 4.58                               | 3.13                               | 8.62E-228           | 3.54E-169           | 6.96E-186           | 9.57E-107           |
| 2.89                               | 5.28                               | 9.90E-235           | 1.82E-147           | 1.09E-133           | 1.26E-111           |
| 1.53                               | 1.94                               | 6.81E-22            | 8.43E-60            | 7.79E-20            | 3.19E-27            |
| 2.11                               | 2.11                               | 2.29E-107           | 1.23E-80            | 2.16E-25            | 6.31E-67            |
| 1.91                               | 2.24                               | 3.56E-104           | 3.26E-56            | 3.90E-25            | 2.12E-52            |
| 1.12                               | 1.14                               | 3.76E-51            | 1.10E-30            | 1.61E-24            | 5.28E-26            |
| 1.57                               | 2.23                               | 2.84E-78            | 1.79E-66            | 2.59E-102           | 4.15E-24            |
| 2.25                               | 0.96                               | 1.93E-23            | 7.92E-39            | 2.53E-36            | 1.85E-32            |
| 1.68                               | 1.68                               | 3.19E-153           | 1.58E-112           | 3.38E-100           | 3.43E-78            |
| 1.65                               | 1.92                               | 5.74E-48            | 2.98E-66            | 2.57E-65            | 4.99E-22            |
| 2.12                               | 2.15                               | 1.94E-70            | 9.70E-47            | 5.44E-41            | 9.61E-22            |
| 2.00                               | 2.24                               | 9.22E-217           | 3.12E-140           | 5.18E-123           | 2.34E-107           |
| 2.13                               | 1.84                               | 1.50E-134           | 5.39E-95            | 1.97E-85            | 7.55E-74            |
| 3.79                               | 2.46                               | 7.29E-30            | 9.47E-31            | 7.43E-39            | 1.69E-18            |
| 1.36                               | 1.63                               | 7.17E-33            | 7.54E-31            | 3.76E-17            | 1.59E-18            |
| 1.70                               | 2.40                               | 5.31E-129           | 9.10E-102           | 1.65E-34            | 4.16E-53            |
| 1.09                               | 1.28                               | 4.04E-78            | 6.59E-48            | 3.24E-28            | 1.80E-48            |
| 2.49                               | 2.12                               | 6.50E-108           | 2.10E-89            | 2.10E-58            | 1.09E-48            |
| 1.21                               | 1.44                               | 1.53E-65            | 1.54E-49            | 2.46E-13            | 2.59E-39            |
| 3.34                               | 3.09                               | 2.35E-128           | 3.45E-74            | 2.15E-12            | 6.71E-45            |
| 1.43                               | 3.61                               | 2.99E-18            | 6.52E-17            | 3.21E-14            | 2.47E-12            |
| 2.26                               | 2.11                               | 1.36E-24            | 4.96E-35            | 4.54E-11            | 1.42E-44            |
| 1.27                               | 1.04                               | 4.88E-198           | 1.14E-84            | 8.58E-11            | 5.28E-95            |
| 1.66                               | 3.53                               | 3.34E-158           | 3.91E-89            | 3.06E-39            | 1.09E-67            |
| 0.34                               | 1.11                               | 1.32E-09            | 5.21E-19            | 6.41E-09            | 3.53E-28            |
| 1.49                               | 1.35                               | 2.14E-91            | 3.55E-68            | 1.51E-53            | 1.58E-34            |
| 0.99                               | 2.31                               | 3.25E-58            | 5.10E-18            | 5.05E-39            | 9.30E-09            |
| 1.13                               | 1.15                               | 1.19E-12            | 2.93E-14            | 2.71E-09            | 1.21E-08            |
| 1.50                               | 2.01                               | 3.28E-48            | 4.99E-31            | 1.87E-08            | 1.56E-37            |
| 0.44                               | 1.64                               | 1.56E-25            | 5.43E-19            | 9.37E-12            | 4.62E-22            |
| 0.71                               | 0.92                               | 5.16E-21            | 1.47E-21            | 6.61E-15            | 2.90E-09            |
| 0.96                               | 1.10                               | 1.17E-11            | 4.94E-21            | 5.14E-08            | 2.63E-13            |
| 1.83                               | 1.99                               | 1.26E-35            | 1.70E-34            | 5.42E-08            | 4.15E-20            |
| 1.01                               | 0.98                               | 2.26E-29            | 1.58E-35            | 8.44E-41            | 6.17E-08            |
| 0.79                               | 0.86                               | 7.24E-31            | 2.78E-22            | 9.42E-08            | 1.18E-21            |
| 0.57                               | 1.00                               | 5.08E-41            | 4.30E-30            | 1.43E-22            | 3.88E-06            |
| 0.74                               | 1.23                               | 2.30E-78            | 3.56E-60            | 1.44E-33            | 7.89E-48            |
| 1.03                               | 1.85                               | 6.93E-107           | 9.55E-52            | 6.10E-72            | 1.98E-48            |

<https://jitc.bmj.com>



|    |      |      |           |           |           |           |
|----|------|------|-----------|-----------|-----------|-----------|
| 1  |      |      |           |           |           |           |
| 2  | 1.31 | 1.25 | 1.52E-118 | 4.05E-77  | 2.00E-51  | 5.40E-77  |
| 3  | 0.64 | 0.86 | 4.90E-61  | 9.88E-35  | 5.11E-11  | 5.63E-36  |
| 4  | 3.31 | 5.07 | 1.87E-17  | 4.49E-23  | 1.87E-07  | 4.83E-14  |
| 5  | 0.90 | 0.95 | 1.23E-52  | 1.23E-30  | 4.71E-08  | 9.21E-21  |
| 6  | 0.04 | 0.99 | 5.34E-22  | 4.66E-13  | 2.18E-15  | 6.38E-18  |
| 7  | 1.20 | 2.29 | 1.37E-47  | 1.78E-35  | 5.16E-12  | 9.32E-45  |
| 8  | 0.02 | 1.40 | 1.30E-83  | 9.13E-34  | 1.27E-36  | 9.95E-27  |
| 9  | 0.20 | 0.28 | 1.03E-09  | 2.04E-09  | 0.0002711 | 3.09E-10  |
| 10 | 2.79 | 1.41 | 4.46E-122 | 7.44E-94  | 1.64E-115 | 4.02E-59  |
| 11 | 2.06 | 1.37 | 3.13E-199 | 2.79E-119 | 8.53E-86  | 3.72E-108 |
| 12 | 0.69 | 0.63 | 8.32E-19  | 2.76E-19  | 1.62E-14  | 1.31E-06  |
| 13 | 0.37 | 1.01 | 1.16E-15  | 5.84E-13  | 2.58E-09  | 7.82E-12  |
| 14 | 0.85 | 0.98 | 9.61E-36  | 1.30E-31  | 5.81E-16  | 3.33E-21  |
| 15 | 0.48 | 0.59 | 2.21E-38  | 5.33E-20  | 5.55E-09  | 4.73E-22  |
| 16 | 0.47 | 1.46 | 7.87E-35  | 1.59E-23  | 3.10E-08  | 2.45E-11  |
| 17 | 0.96 | 0.87 | 2.04E-64  | 6.87E-39  | 4.46E-06  | 2.04E-53  |
| 18 | 0.69 | 1.47 | 6.25E-51  | 9.91E-27  | 5.49E-21  | 2.95E-08  |
| 19 | 0.79 | 0.88 | 9.04E-78  | 3.18E-48  | 6.37E-06  | 4.82E-48  |
| 20 | 2.33 | 1.27 | 1.16E-45  | 3.58E-52  | 4.02E-42  | 3.05E-44  |
| 21 | 1.33 | 3.12 | 4.10E-94  | 3.16E-80  | 5.86E-84  | 3.70E-35  |
| 22 | 1.01 | 0.88 | 3.31E-51  | 4.42E-35  | 1.98E-30  | 1.04E-19  |
| 23 | 0.38 | 0.61 | 3.06E-07  | 5.86E-05  | 0.0096815 | 1.60E-07  |
| 24 | 1.16 | 1.12 | 1.10E-89  | 2.20E-42  | 4.03E-30  | 6.02E-25  |
| 25 | 1.01 | 0.03 | 1.69E-15  | 8.11E-17  | 7.75E-05  | 1.36E-05  |
| 26 | 1.19 | 1.85 | 1.30E-54  | 2.02E-24  | 1.60E-05  | 8.49E-19  |
| 27 | 0.88 | 0.64 | 2.89E-57  | 5.96E-44  | 2.47E-24  | 9.49E-39  |
| 28 | 0.92 | 0.90 | 3.23E-42  | 1.48E-31  | 3.22E-45  | 2.67E-23  |
| 29 | 0.90 | 0.85 | 3.40E-36  | 2.96E-35  | 2.93E-05  | 2.62E-12  |
| 30 | 0.45 | 2.33 | 4.54E-44  | 2.60E-17  | 1.14E-65  | 3.00E-08  |
| 31 | 0.69 | 1.43 | 2.74E-78  | 5.41E-64  | 1.14E-52  | 2.25E-43  |
| 32 | 0.56 | 0.48 | 2.53E-28  | 1.31E-26  | 2.19E-19  | 3.30E-19  |
| 33 | 0.53 | 0.76 | 1.63E-11  | 2.01E-05  | 6.76E-05  | 1.80E-09  |
| 34 | 0.33 | 0.47 | 1.30E-11  | 9.18E-09  | 8.55E-09  | 0.0474222 |
| 35 | 0.65 | 2.26 | 2.36E-23  | 2.49E-25  | 2.47E-22  | 2.18E-10  |
| 36 | 0.94 | 0.65 | 3.24E-64  | 1.84E-45  | 6.69E-39  | 1.23E-35  |
| 37 | 0.59 | 0.59 | 7.20E-10  | 1.53E-05  | 9.74E-05  | 0.0002744 |
| 38 | 1.00 | 1.90 | 3.29E-114 | 2.78E-87  | 7.23E-100 | 6.89E-34  |
| 39 | 0.37 | 0.45 | 1.09E-26  | 1.23E-13  | 1.07E-13  | 5.35E-14  |
| 40 | 0.33 | 0.58 | 4.01E-11  | 1.68E-08  | 0.0129896 | 1.19E-06  |
| 41 | 0.59 | 0.27 | 3.34E-232 | 4.65E-109 | 4.06E-68  | 7.08E-63  |
| 42 | 0.29 | 0.31 | 1.68E-11  | 1.05E-07  | 0.0005777 | 1.07E-06  |
| 43 | 0.58 | 0.94 | 6.14E-13  | 2.88E-09  | 1.53E-13  | 5.42E-10  |
| 44 | 0.66 | 0.52 | 1.16E-19  | 5.62E-20  | 5.54E-18  | 8.60E-09  |
| 45 | 0.30 | 0.40 | 3.27E-31  | 4.53E-26  | 2.13E-08  | 5.04E-14  |
| 46 | 1.18 | 1.18 | 6.13E-165 | 1.25E-94  | 1.79E-41  | 1.80E-69  |
| 47 | 2.04 | 1.18 | 1.78E-75  | 9.75E-56  | 8.97E-16  | 9.23E-54  |
| 48 | 0.69 | 1.76 | 1.48E-31  | 4.95E-20  | 0.0005136 | 1.60E-12  |
| 49 | 0.84 | 1.00 | 9.02E-81  | 7.60E-43  | 0.00057   | 2.97E-54  |
| 50 | 0.35 | 0.44 | 1.15E-28  | 1.52E-14  | 0.0006206 | 9.97E-21  |

<https://jitc.bmj.com>

|    |      |      |            |            |           |           |
|----|------|------|------------|------------|-----------|-----------|
| 1  |      |      |            |            |           |           |
| 2  | 0.41 | 0.81 | 2.09E-06   | 4.59E-08   | 1.40E-09  | 0.0126667 |
| 3  | 1.53 | 0.60 | 8.96E-65   | 4.57E-36   | 8.40E-44  | 5.20E-27  |
| 4  | 0.35 | 0.83 | 2.71E-118  | 5.96E-57   | 3.93E-17  | 3.79E-65  |
| 5  | 0.50 | 0.92 | 1.23E-84   | 2.81E-61   | 2.70E-70  | 7.56E-21  |
| 6  | 0.22 | 0.24 | 1.56E-29   | 4.02E-16   | 0.0402801 | 6.49E-23  |
| 7  | 0.75 | 0.86 | 1.35E-16   | 1.31E-12   | 4.76E-06  | 0.0009419 |
| 8  | 1.00 | 0.94 | 2.64E-14   | 1.66E-06   | 0.0009505 | 1.54E-10  |
| 9  | 0.31 | 0.65 | 6.36E-34   | 2.17E-22   | 7.01E-08  | 2.45E-21  |
| 10 | 0.18 | 2.61 | 5.93E-95   | 1.15E-23   | 0.001467  | 3.88E-39  |
| 11 | 0.68 | 0.75 | 1.52E-36   | 4.93E-19   | 5.26E-26  | 7.41E-14  |
| 12 | 0.44 | 0.93 | 3.36E-54   | 1.55E-37   | 2.53E-36  | 4.07E-09  |
| 13 | 0.63 | 0.58 | 2.27E-15   | 9.91E-12   | 0.0016146 | 2.97E-09  |
| 14 | 0.67 | 0.88 | 6.33E-09   | 2.94E-08   | 2.15E-06  | 0.0016833 |
| 15 | 0.13 | 0.13 | 4.54E-08   | 1.52E-06   | 8.32E-05  | 2.29E-05  |
| 16 | 0.41 | 0.57 | 1.55E-23   | 1.01E-19   | 1.09E-24  | 4.95E-08  |
| 17 | 0.93 | 1.32 | 6.42E-20   | 1.70E-15   | 0.003003  | 5.34E-06  |
| 18 | 0.38 | 0.36 | 2.64E-14   | 3.23E-17   | 2.41E-31  | 0.0011845 |
| 19 | 0.41 | 0.45 | 1.44E-05   | 7.94E-08   | 0.0031757 | 1.64E-07  |
| 20 | 0.60 | 0.80 | 0.00351516 | 0.00122432 | 0.0001644 | 0.0035734 |
| 21 | 0.23 | 1.08 | 5.72E-24   | 7.73E-16   | 2.42E-19  | 2.67E-21  |
| 22 | 0.39 | 0.75 | 0.00641622 | 1.65E-06   | 6.57E-13  | 0.0015082 |
| 23 | 0.39 | 0.42 | 1.17E-17   | 2.96E-10   | 9.44E-05  | 1.46E-06  |
| 24 | 0.19 | 0.20 | 5.24E-07   | 2.71E-07   | 0.0004527 | 0.0046501 |
| 25 | 1.89 | 1.23 | 9.61E-94   | 1.65E-42   | 0.0046813 | 7.83E-62  |
| 26 | 0.50 | 0.47 | 1.73E-28   | 7.51E-21   | 1.35E-11  | 3.38E-19  |
| 27 | 1.25 | 0.62 | 3.23E-49   | 3.81E-40   | 5.02E-33  | 2.51E-33  |
| 28 | 0.33 | 0.39 | 3.43E-08   | 8.89E-06   | 0.0004242 | 0.0005279 |
| 29 | 0.89 | 0.98 | 8.10E-23   | 5.96E-21   | 0.0057242 | 1.09E-18  |
| 30 | 0.85 | 0.42 | 2.70E-57   | 2.20E-45   | 1.62E-38  | 5.43E-31  |
| 31 | 1.77 | 0.69 | 2.96E-254  | 4.42E-81   | 3.23E-24  | 1.41E-140 |
| 32 | 0.59 | 0.39 | 4.69E-43   | 1.33E-29   | 1.68E-16  | 1.16E-28  |
| 33 | 1.20 | 0.47 | 6.52E-46   | 3.29E-36   | 1.80E-12  | 8.34E-19  |
| 34 | 1.36 | 1.67 | 1.07E-60   | 9.07E-42   | 0.0094879 | 7.20E-31  |
| 35 | 0.30 | 1.00 | 8.03E-54   | 1.33E-23   | 9.26E-13  | 6.40E-31  |
| 36 | 0.17 | 0.24 | 1.79E-15   | 6.38E-07   | 1.33E-05  | 6.24E-12  |
| 37 | 0.53 | 0.39 | 1.12E-35   | 4.19E-22   | 1.27E-21  | 1.56E-14  |
| 38 | 0.96 | 0.43 | 4.88E-31   | 5.55E-22   | 1.38E-07  | 8.72E-22  |
| 39 | 0.29 | 0.22 | 0.00049551 | 2.37E-06   | 0.0118959 | 1.90E-05  |
| 40 | 0.83 | 1.06 | 4.37E-25   | 2.58E-17   | 0.0128949 | 4.03E-22  |
| 41 | 0.38 | 0.49 | 5.57E-15   | 2.79E-08   | 0.0010036 | 0.0129595 |
| 42 | 0.25 | 0.49 | 1.25E-18   | 9.92E-08   | 6.05E-07  | 9.29E-12  |
| 43 | 0.32 | 0.58 | 2.25E-20   | 1.17E-10   | 0.0045176 | 4.44E-09  |
| 44 | 1.54 | 3.84 | 9.32E-52   | 1.34E-67   | 6.33E-37  | 0.0187405 |
| 45 | 1.36 | 1.45 | 1.10E-21   | 1.39E-14   | 0.0241397 | 1.77E-17  |
| 46 | 1.17 | 0.66 | 2.38E-32   | 1.62E-41   | 0.0004375 | 1.58E-63  |
| 47 | 0.20 | 0.08 | 0.00132815 | 5.59E-05   | 0.0052626 | 3.80E-05  |
| 48 | 0.05 | 0.36 | 7.39E-12   | 0.00033984 | 1.40E-08  | 6.99E-06  |
| 49 | 1.20 | 1.20 | 1.43E-61   | 3.45E-29   | 0.0306225 | 1.74E-22  |
| 50 | 0.49 | 0.79 | 1.62E-10   | 4.93E-08   | 0.0333805 | 1.39E-06  |

<https://jitc.bmj.com>

1  
2  
3  
4  
5  
6  
7  
8  
9  
10  
11  
12  
13  
14  
15  
16  
17  
18  
19  
20  
21  
22  
23  
24  
25  
26  
27  
28  
29  
30  
31  
32  
33  
34  
35  
36  
37  
38  
39  
40  
41  
42  
43  
44  
45  
46  
47  
48  
49  
50  
51  
52  
53  
54  
55  
56  
57  
58  
59  
60

|      |      |            |            |           |           |
|------|------|------------|------------|-----------|-----------|
| 0.25 | 0.28 | 1.94E-07   | 0.00089365 | 0.0346412 | 8.91E-05  |
| 0.61 | 0.76 | 0.04240019 | 9.50E-06   | 0.0353546 | 2.08E-05  |
| 0.71 | 0.89 | 8.01E-24   | 8.71E-12   | 0.0359354 | 1.23E-07  |
| 0.31 | 0.38 | 1.16E-06   | 9.22E-07   | 2.02E-06  | 0.0363689 |
| 0.47 | 2.97 | 1.09E-160  | 1.01E-74   | 2.28E-95  | 4.01E-14  |
| 2.42 | 2.75 | 2.26E-282  | 1.17E-164  | 0.0412413 | 4.49E-173 |
| 0.61 | 0.54 | 1.05E-15   | 6.49E-10   | 0.0465191 | 1.37E-12  |
| 0.64 | 0.35 | 4.77E-07   | 0.00444566 | 0.0476443 | 0.0001089 |
| 0.42 | 0.38 | 1.32E-19   | 5.71E-19   | 2.36E-05  | 8.79E-15  |

| Adjusted p value(5) | Adjusted p value(6) | Minimum fold change | mean fold change | maximum fold change | Cluster 0 mean | Cluster 1 mean | Cluster 2 mean | Cluster 3 mean |
|---------------------|---------------------|---------------------|------------------|---------------------|----------------|----------------|----------------|----------------|
| 2.35E-62            | 2.02E-30            | 2.91                | 3.78             | 4.51                | 0.48           | 0.55           | 0.38           | 1.58           |
| 3.65E-88            | 1.89E-109           | 0.40                | 0.63             | 0.88                | 4.93           | 4.98           | 4.94           | 5.35           |
| 2.81E-38            | 1.36E-22            | 1.63                | 1.97             | 2.20                | 0.00           | 0.02           | 0.12           | 0.51           |
| 8.46E-84            | 3.69E-30            | 3.13                | 4.49             | 5.18                | 0.14           | 0.22           | 0.12           | 1.44           |
| 2.93E-28            | 4.56E-83            | 2.89                | 4.59             | 5.68                | 0.52           | 0.71           | 0.76           | 1.91           |
| 1.18E-26            | 4.51E-41            | 0.69                | 1.23             | 1.94                | 2.38           | 2.07           | 2.38           | 2.67           |
| 1.85E-50            | 2.05E-41            | 1.13                | 1.96             | 2.17                | 0.00           | 0.01           | 0.23           | 0.57           |
| 1.01E-26            | 4.84E-33            | 1.59                | 2.14             | 2.54                | 0.06           | 0.14           | 0.26           | 0.59           |
| 1.05E-22            | 2.57E-19            | 1.07                | 1.14             | 1.23                | 0.02           | 0.05           | 0.05           | 0.27           |
| 2.20E-08            | 8.61E-15            | 1.54                | 2.61             | 3.99                | 0.65           | 0.65           | 0.46           | 1.33           |
| 3.68E-27            | 8.73E-05            | 0.73                | 1.26             | 2.25                | 2.17           | 1.98           | 1.98           | 2.43           |
| 3.83E-22            | 9.15E-17            | 1.68                | 2.32             | 2.69                | 0.01           | 0.02           | 0.02           | 0.55           |
| 6.49E-20            | 1.48E-23            | 1.56                | 1.94             | 2.33                | 0.18           | 0.12           | 0.09           | 0.57           |
| 3.07E-27            | 2.44E-23            | 1.47                | 2.05             | 2.38                | 0.16           | 0.23           | 0.21           | 0.71           |
| 6.69E-21            | 4.35E-22            | 2.00                | 3.08             | 3.70                | 0.01           | 0.05           | 0.06           | 0.79           |
| 2.27E-36            | 1.72E-19            | 1.84                | 2.37             | 2.60                | 0.01           | 0.02           | 0.02           | 0.63           |
| 2.35E-42            | 5.05E-16            | 0.65                | 1.85             | 3.79                | 1.41           | 1.35           | 1.30           | 1.74           |
| 2.50E-14            | 3.28E-18            | 1.16                | 1.41             | 1.63                | 0.19           | 0.20           | 0.27           | 0.49           |
| 8.21E-17            | 1.80E-29            | 1.70                | 2.43             | 3.06                | 0.07           | 0.09           | 0.32           | 0.72           |
| 8.52E-17            | 2.01E-22            | 1.09                | 1.32             | 1.49                | 0.01           | 0.03           | 0.06           | 0.30           |
| 2.68E-22            | 1.03E-13            | 2.12                | 2.82             | 3.50                | 0.39           | 0.43           | 0.54           | 1.14           |
| 1.34E-19            | 9.29E-32            | 0.85                | 1.30             | 1.45                | 0.01           | 0.02           | 0.14           | 0.33           |
| 6.57E-39            | 1.85E-27            | 0.98                | 3.05             | 4.22                | 0.30           | 0.49           | 1.10           | 1.36           |
| 2.96E-07            | 6.08E-51            | 0.49                | 1.41             | 3.61                | 1.66           | 1.62           | 1.71           | 1.90           |
| 1.84E-14            | 3.23E-13            | 0.80                | 1.77             | 2.26                | 1.07           | 1.01           | 1.23           | 1.36           |
| 1.01E-06            | 0.0039907           | 0.76                | 2.58             | 5.10                | 0.45           | 0.79           | 1.48           | 1.69           |
| 6.03E-10            | 3.63E-48            | 1.66                | 3.05             | 4.19                | 0.20           | 0.36           | 0.65           | 1.17           |
| 1.24E-07            | 2.38E-32            | 0.28                | 0.52             | 1.11                | 2.86           | 2.71           | 2.85           | 2.99           |
| 5.17E-16            | 1.59E-09            | 1.35                | 1.83             | 2.14                | 0.01           | 0.03           | 0.05           | 0.61           |
| 1.49E-05            | 1.50E-32            | 0.58                | 1.53             | 2.31                | 0.17           | 0.38           | 0.21           | 0.67           |
| 4.18E-06            | 0.0001219           | 0.75                | 1.13             | 1.35                | 0.60           | 0.60           | 0.62           | 0.82           |
| 7.85E-18            | 2.74E-31            | 0.91                | 1.65             | 2.01                | 0.16           | 0.22           | 0.37           | 0.52           |
| 2.71E-08            | 1.41E-08            | 0.44                | 1.37             | 1.81                | 0.79           | 0.83           | 0.93           | 1.14           |
| 3.92E-08            | 6.63E-10            | 0.71                | 0.86             | 0.96                | 0.08           | 0.08           | 0.10           | 0.27           |
| 2.79E-10            | 4.56E-06            | 0.92                | 1.10             | 1.37                | 0.34           | 0.29           | 0.37           | 0.53           |
| 7.83E-25            | 2.10E-24            | 0.96                | 1.67             | 1.99                | 0.24           | 0.25           | 0.44           | 0.58           |
| 3.35E-06            | 8.59E-05            | 0.52                | 1.22             | 1.87                | 0.26           | 0.23           | 0.16           | 0.56           |
| 4.75E-11            | 6.07E-10            | 0.70                | 0.92             | 1.09                | 0.06           | 0.09           | 0.15           | 0.26           |
| 1.22E-07            | 3.49E-07            | 0.57                | 1.03             | 1.43                | 0.09           | 0.12           | 0.13           | 0.39           |
| 1.26E-07            | 4.90E-11            | 0.74                | 1.47             | 1.80                | 0.02           | 0.03           | 0.08           | 0.41           |
| 1.30E-07            | 2.33E-14            | 1.03                | 2.29             | 3.01                | 0.13           | 0.26           | 0.18           | 0.77           |

<https://jitc.bmj.com>

|    |           |           |      |      |      |      |      |      |      |
|----|-----------|-----------|------|------|------|------|------|------|------|
| 1  |           |           |      |      |      |      |      |      |      |
| 2  | 1.41E-07  | 1.32E-07  | 1.25 | 2.51 | 3.56 | 0.24 | 0.34 | 0.47 | 1.04 |
| 3  | 1.44E-07  | 1.69E-12  | 0.64 | 0.88 | 1.05 | 0.00 | 0.01 | 0.08 | 0.21 |
| 4  | 6.38E-32  | 2.28E-78  | 0.83 | 2.15 | 5.07 | 1.34 | 1.21 | 1.41 | 1.57 |
| 5  | 1.88E-07  | 0.0005976 | 0.90 | 1.37 | 2.17 | 0.24 | 0.33 | 0.50 | 0.68 |
| 6  | 4.13E-07  | 0.0072161 | 0.04 | 1.24 | 1.79 | 0.86 | 0.93 | 0.90 | 1.23 |
| 7  | 4.58E-07  | 1.50E-20  | 1.20 | 1.92 | 2.40 | 0.40 | 0.44 | 0.62 | 0.89 |
| 8  | 4.73E-07  | 1.67E-05  | 0.02 | 1.83 | 3.22 | 0.49 | 0.72 | 0.71 | 1.17 |
| 9  | 4.82E-07  | 0.0455214 | 0.20 | 0.53 | 0.82 | 0.14 | 0.14 | 0.18 | 0.26 |
| 10 | 1.44E-36  | 8.74E-07  | 1.41 | 2.88 | 3.61 | 0.16 | 0.21 | 0.12 | 0.96 |
| 11 | 1.56E-23  | 1.20E-06  | 1.37 | 2.88 | 3.73 | 0.02 | 0.09 | 0.14 | 0.84 |
| 12 | 1.61E-12  | 1.32E-06  | 0.59 | 0.70 | 0.81 | 0.07 | 0.07 | 0.08 | 0.21 |
| 13 | 1.89E-06  | 2.73E-07  | 0.37 | 0.92 | 1.13 | 0.27 | 0.31 | 0.31 | 0.48 |
| 14 | 2.34E-06  | 3.20E-06  | 0.85 | 1.20 | 1.47 | 0.11 | 0.11 | 0.17 | 0.42 |
| 15 | 2.76E-06  | 1.28E-08  | 0.48 | 0.62 | 0.73 | 0.00 | 0.02 | 0.05 | 0.16 |
| 16 | 3.26E-06  | 2.99E-09  | 0.47 | 1.29 | 1.90 | 0.30 | 0.37 | 0.48 | 0.67 |
| 17 | 8.75E-09  | 0.0006903 | 0.81 | 1.47 | 2.22 | 0.11 | 0.17 | 0.39 | 0.54 |
| 18 | 6.02E-06  | 1.02E-15  | 0.69 | 1.24 | 1.72 | 0.09 | 0.17 | 0.19 | 0.45 |
| 19 | 9.46E-09  | 1.24E-07  | 0.65 | 1.07 | 1.38 | 0.00 | 0.02 | 0.16 | 0.30 |
| 20 | 1.62E-29  | 6.58E-06  | 1.27 | 2.01 | 2.33 | 0.33 | 0.32 | 0.35 | 0.79 |
| 21 | 7.22E-06  | 5.14E-32  | 1.33 | 2.70 | 3.34 | 0.74 | 0.80 | 0.71 | 1.51 |
| 22 | 3.63E-11  | 7.26E-06  | 0.88 | 1.25 | 1.51 | 0.06 | 0.08 | 0.09 | 0.36 |
| 23 | 7.40E-06  | 0.0131432 | 0.38 | 0.65 | 0.91 | 0.28 | 0.32 | 0.34 | 0.41 |
| 24 | 2.02E-07  | 9.78E-06  | 1.12 | 1.81 | 2.75 | 0.14 | 0.28 | 0.33 | 0.75 |
| 25 | 1.89E-13  | 1.31E-05  | 0.03 | 0.74 | 1.07 | 0.16 | 0.15 | 0.23 | 0.33 |
| 26 | 1.01E-09  | 2.03E-18  | 0.85 | 1.58 | 2.27 | 0.23 | 0.36 | 0.53 | 0.66 |
| 27 | 6.20E-18  | 2.02E-05  | 0.64 | 0.92 | 1.04 | 0.00 | 0.00 | 0.03 | 0.22 |
| 28 | 8.20E-08  | 2.22E-05  | 0.90 | 1.30 | 1.67 | 0.10 | 0.12 | 0.06 | 0.40 |
| 29 | 5.35E-06  | 0.000209  | 0.81 | 1.25 | 1.87 | 0.23 | 0.23 | 0.45 | 0.56 |
| 30 | 3.82E-05  | 4.66E-21  | 0.45 | 1.70 | 2.93 | 0.42 | 0.60 | 0.27 | 0.91 |
| 31 | 4.63E-05  | 2.24E-20  | 0.69 | 1.45 | 1.67 | 0.01 | 0.01 | 0.02 | 0.37 |
| 32 | 1.47E-09  | 5.09E-05  | 0.48 | 0.60 | 0.66 | 0.01 | 0.00 | 0.01 | 0.15 |
| 33 | 1.38E-06  | 8.46E-13  | 0.45 | 0.59 | 0.76 | 0.09 | 0.13 | 0.13 | 0.20 |
| 34 | 8.17E-05  | 0.023979  | 0.33 | 0.64 | 0.93 | 0.22 | 0.25 | 0.23 | 0.39 |
| 35 | 8.40E-05  | 1.21E-15  | 0.65 | 1.56 | 2.26 | 0.85 | 0.85 | 0.86 | 1.17 |
| 36 | 2.51E-19  | 9.56E-05  | 0.65 | 1.00 | 1.11 | 0.00 | 0.01 | 0.01 | 0.23 |
| 37 | 4.57E-08  | 3.65E-06  | 0.37 | 0.51 | 0.59 | 0.08 | 0.11 | 0.13 | 0.19 |
| 38 | 1.00E-04  | 1.64E-13  | 1.00 | 2.47 | 3.41 | 0.16 | 0.20 | 0.14 | 0.86 |
| 39 | 0.0001023 | 0.0001292 | 0.37 | 0.52 | 0.61 | 0.02 | 0.03 | 0.03 | 0.13 |
| 40 | 0.0001929 | 0.0032273 | 0.33 | 0.55 | 0.71 | 0.12 | 0.14 | 0.19 | 0.26 |
| 41 | 8.49E-11  | 0.0002298 | 0.27 | 2.68 | 4.79 | 0.07 | 0.27 | 0.42 | 1.17 |
| 42 | 0.0003075 | 0.0253316 | 0.29 | 0.44 | 0.55 | 0.06 | 0.08 | 0.10 | 0.17 |
| 43 | 0.0003287 | 1.41E-05  | 0.58 | 0.92 | 1.11 | 0.28 | 0.32 | 0.26 | 0.46 |
| 44 | 6.28E-10  | 0.0003584 | 0.52 | 0.65 | 0.74 | 0.03 | 0.03 | 0.03 | 0.18 |
| 45 | 0.0003918 | 0.001527  | 0.30 | 0.54 | 0.70 | 0.01 | 0.01 | 0.05 | 0.15 |
| 46 | 3.76E-06  | 0.0004834 | 1.18 | 2.61 | 4.22 | 0.18 | 0.33 | 0.59 | 1.14 |
| 47 | 1.31E-14  | 0.0004916 | 1.18 | 2.23 | 3.11 | 0.45 | 0.54 | 0.81 | 1.08 |
| 48 | 4.11E-06  | 9.55E-29  | 0.55 | 1.12 | 1.76 | 0.15 | 0.22 | 0.35 | 0.44 |
| 49 | 1.48E-08  | 7.88E-08  | 0.61 | 1.29 | 1.86 | 0.03 | 0.08 | 0.29 | 0.38 |
| 50 | 7.83E-06  | 2.91E-07  | 0.30 | 0.44 | 0.54 | 0.00 | 0.01 | 0.05 | 0.10 |

<https://jitc.bmj.com>

|    |           |           |      |      |      |      |      |      |      |
|----|-----------|-----------|------|------|------|------|------|------|------|
| 1  | 0.0006918 | 2.03E-05  | 0.41 | 0.67 | 0.87 | 0.23 | 0.22 | 0.19 | 0.35 |
| 2  | 2.33E-10  | 0.0007375 | 0.60 | 1.78 | 2.54 | 0.28 | 0.41 | 0.33 | 0.86 |
| 3  | 0.0007588 | 0.0032373 | 0.35 | 1.96 | 3.47 | 0.20 | 0.37 | 0.66 | 0.95 |
| 4  | 0.0007777 | 0.0184927 | 0.50 | 2.04 | 3.23 | 0.45 | 0.56 | 0.46 | 1.15 |
| 5  | 0.0008916 | 0.0066309 | 0.22 | 0.54 | 0.86 | 0.02 | 0.05 | 0.13 | 0.19 |
| 6  | 1.89E-06  | 1.52E-05  | 0.53 | 0.82 | 1.08 | 0.20 | 0.23 | 0.28 | 0.40 |
| 7  | 2.77E-13  | 5.07E-08  | 0.48 | 0.82 | 1.00 | 0.16 | 0.22 | 0.25 | 0.33 |
| 8  | 0.0012081 | 0.0002745 | 0.31 | 0.79 | 1.07 | 0.05 | 0.07 | 0.14 | 0.26 |
| 9  | 0.012865  | 1.87E-150 | 0.17 | 0.78 | 2.61 | 2.89 | 3.13 | 3.30 | 3.38 |
| 10 | 0.0014685 | 0.027956  | 0.68 | 1.30 | 1.88 | 0.29 | 0.38 | 0.33 | 0.68 |
| 11 | 0.0015547 | 1.25E-14  | 0.44 | 0.89 | 1.10 | 0.01 | 0.02 | 0.01 | 0.24 |
| 12 | 1.80E-08  | 6.63E-05  | 0.14 | 0.54 | 0.69 | 0.07 | 0.10 | 0.19 | 0.21 |
| 13 | 1.79E-06  | 6.68E-08  | 0.46 | 0.67 | 0.88 | 0.17 | 0.18 | 0.20 | 0.29 |
| 14 | 0.0018799 | 0.0105858 | 0.13 | 0.14 | 0.15 | 0.00 | 0.00 | 0.00 | 0.03 |
| 15 | 0.0024161 | 5.01E-05  | 0.41 | 0.65 | 0.82 | 0.03 | 0.03 | 0.02 | 0.18 |
| 16 | 1.33E-06  | 9.33E-07  | 0.51 | 1.06 | 1.46 | 0.44 | 0.46 | 0.64 | 0.72 |
| 17 | 0.0032733 | 0.0030076 | 0.36 | 0.69 | 1.14 | 0.11 | 0.10 | 0.04 | 0.26 |
| 18 | 0.0060662 | 0.0088693 | 0.22 | 0.44 | 0.58 | 0.12 | 0.11 | 0.17 | 0.20 |
| 19 | 3.75E-05  | 2.09E-07  | 0.41 | 0.53 | 0.80 | 0.21 | 0.23 | 0.20 | 0.28 |
| 20 | 0.0036608 | 8.93E-11  | 0.23 | 0.99 | 1.29 | 0.12 | 0.16 | 0.13 | 0.35 |
| 21 | 0.0038776 | 9.61E-05  | 0.39 | 0.63 | 0.97 | 0.28 | 0.24 | 0.18 | 0.36 |
| 22 | 0.0040763 | 0.0352084 | 0.39 | 0.56 | 0.82 | 0.08 | 0.12 | 0.15 | 0.24 |
| 23 | 6.88E-07  | 0.0275689 | 0.17 | 0.49 | 0.93 | 0.61 | 0.62 | 0.69 | 0.76 |
| 24 | 1.13E-39  | 2.39E-09  | 0.23 | 1.55 | 2.14 | 0.03 | 0.11 | 0.43 | 0.47 |
| 25 | 5.41E-09  | 0.0048293 | 0.47 | 1.01 | 1.43 | 0.18 | 0.20 | 0.27 | 0.46 |
| 26 | 6.44E-18  | 0.0054038 | 0.62 | 1.22 | 1.40 | 0.04 | 0.05 | 0.06 | 0.36 |
| 27 | 0.0054329 | 0.0138206 | 0.33 | 0.41 | 0.47 | 0.07 | 0.08 | 0.08 | 0.16 |
| 28 | 6.29E-08  | 2.37E-06  | 0.41 | 0.99 | 1.27 | 0.16 | 0.17 | 0.33 | 0.41 |
| 29 | 1.40E-13  | 0.0057517 | 0.42 | 0.94 | 1.10 | 0.00 | 0.01 | 0.01 | 0.24 |
| 30 | 2.15E-10  | 0.0061729 | 0.69 | 3.08 | 5.71 | 0.22 | 0.70 | 1.10 | 1.55 |
| 31 | 5.04E-10  | 0.0078843 | 0.39 | 0.67 | 0.82 | 0.00 | 0.01 | 0.03 | 0.16 |
| 32 | 2.38E-14  | 0.0081091 | 0.47 | 1.16 | 1.51 | 0.07 | 0.09 | 0.18 | 0.42 |
| 33 | 5.16E-19  | 3.80E-28  | 0.46 | 1.40 | 1.74 | 0.06 | 0.10 | 0.34 | 0.41 |
| 34 | 0.010124  | 0.001383  | 0.30 | 1.44 | 2.33 | 0.29 | 0.43 | 0.53 | 0.76 |
| 35 | 0.0103408 | 8.05E-05  | 0.17 | 0.25 | 0.31 | 0.00 | 0.01 | 0.02 | 0.06 |
| 36 | 9.42E-08  | 0.0105952 | 0.39 | 0.59 | 0.67 | 0.00 | 0.01 | 0.01 | 0.16 |
| 37 | 1.89E-16  | 0.0118135 | 0.43 | 0.96 | 1.24 | 0.09 | 0.12 | 0.20 | 0.33 |
| 38 | 3.75E-05  | 0.0370407 | 0.20 | 0.27 | 0.33 | 0.04 | 0.02 | 0.05 | 0.08 |
| 39 | 2.48E-05  | 5.19E-07  | 0.49 | 1.04 | 1.35 | 0.19 | 0.23 | 0.37 | 0.44 |
| 40 | 0.0115825 | 0.0029259 | 0.16 | 0.44 | 0.68 | 0.06 | 0.08 | 0.12 | 0.20 |
| 41 | 0.0155963 | 0.0216354 | 0.25 | 0.71 | 1.09 | 0.18 | 0.26 | 0.26 | 0.41 |
| 42 | 0.0170457 | 6.43E-07  | 0.32 | 0.49 | 0.63 | 0.02 | 0.04 | 0.09 | 0.16 |
| 43 | 1.37E-13  | 8.63E-46  | 0.45 | 2.38 | 3.84 | 0.81 | 0.71 | 0.85 | 1.37 |
| 44 | 6.37E-07  | 1.35E-06  | 0.33 | 1.31 | 1.69 | 0.63 | 0.70 | 0.93 | 0.94 |
| 45 | 6.90E-05  | 0.0280085 | 0.66 | 1.68 | 3.14 | 1.03 | 0.91 | 1.27 | 1.43 |
| 46 | 0.0003561 | 0.0291914 | 0.08 | 0.25 | 0.34 | 0.06 | 0.05 | 0.06 | 0.11 |
| 47 | 0.0300385 | 0.0011396 | 0.05 | 0.33 | 0.43 | 0.02 | 0.05 | 0.03 | 0.11 |
| 48 | 1.77E-13  | 1.70E-09  | 0.24 | 1.22 | 1.80 | 0.07 | 0.15 | 0.40 | 0.44 |
| 49 | 8.58E-05  | 7.56E-05  | 0.41 | 0.64 | 0.83 | 0.20 | 0.23 | 0.30 | 0.35 |

<https://jitc.bmj.com>

1  
2  
3  
4  
5  
6  
7  
8  
9  
10  
11  
12  
13  
14  
15  
16  
17  
18  
19  
20  
21  
22  
23  
24  
25  
26  
27  
28  
29  
30  
31  
32  
33  
34  
35  
36  
37  
38  
39  
40  
41  
42  
43  
44  
45  
46  
47  
48  
49  
50  
51  
52  
53  
54  
55  
56  
57  
58  
59  
60

|           |           |      |      |      |      |      |      |      |
|-----------|-----------|------|------|------|------|------|------|------|
| 0.0077521 | 0.0061328 | 0.15 | 0.27 | 0.32 | 0.03 | 0.04 | 0.06 | 0.09 |
| 0.0009672 | 0.0002289 | 0.28 | 0.52 | 0.76 | 0.30 | 0.27 | 0.33 | 0.36 |
| 1.04E-06  | 0.0029988 | 0.58 | 0.99 | 1.72 | 0.57 | 0.70 | 0.82 | 0.91 |
| 4.24E-07  | 7.17E-06  | 0.22 | 0.32 | 0.38 | 0.03 | 0.04 | 0.03 | 0.10 |
| 0.0376844 | 7.07E-71  | 0.47 | 1.82 | 2.97 | 1.70 | 1.99 | 1.87 | 2.71 |
| 2.99E-21  | 6.27E-26  | 0.22 | 3.38 | 5.21 | 0.04 | 0.16 | 1.20 | 1.24 |
| 7.96E-09  | 0.0032777 | 0.27 | 0.58 | 0.73 | 0.07 | 0.09 | 0.16 | 0.22 |
| 0.0001431 | 0.0299568 | 0.29 | 0.61 | 0.94 | 0.59 | 0.66 | 0.72 | 0.72 |
| 0.0092819 | 0.0490815 | 0.38 | 0.82 | 1.20 | 0.20 | 0.20 | 0.31 | 0.43 |



| Cluster 4 mean | Cluster 5 mean | Cluster 6 mean | Percent cells expressing cluster 0 | Percent cells expressing cluster 1 | Percent cells expressing cluster 2 | Percent cells expressing cluster 3 |
|----------------|----------------|----------------|------------------------------------|------------------------------------|------------------------------------|------------------------------------|
| 0.77           | 0.40           | 0.67           | 24.09                              | 29.60                              | 20.70                              | 59.98                              |
| 5.08           | 4.85           | 4.73           | 100.00                             | 99.94                              | 100.00                             | 100.00                             |
| 0.00           | 0.03           | 0.08           | 0.05                               | 0.91                               | 6.19                               | 22.01                              |
| 0.34           | 0.26           | 0.60           | 7.92                               | 12.31                              | 6.95                               | 56.61                              |
| 0.85           | 0.97           | 0.48           | 26.87                              | 36.14                              | 38.66                              | 75.07                              |
| 2.45           | 1.71           | 1.72           | 86.76                              | 79.27                              | 87.01                              | 91.04                              |
| 0.01           | 0.00           | 0.00           | 0.10                               | 0.45                               | 11.46                              | 20.76                              |
| 0.12           | 0.12           | 0.08           | 3.65                               | 8.10                               | 15.20                              | 29.72                              |
| 0.04           | 0.02           | 0.02           | 1.10                               | 2.91                               | 3.21                               | 14.37                              |
| 1.04           | 0.80           | 0.72           | 33.45                              | 34.20                              | 25.36                              | 59.01                              |
| 2.10           | 1.38           | 1.89           | 83.06                              | 79.02                              | 78.92                              | 83.67                              |
| 0.04           | 0.16           | 0.16           | 0.34                               | 1.17                               | 1.38                               | 29.02                              |
| 0.29           | 0.12           | 0.10           | 9.74                               | 7.38                               | 5.42                               | 27.95                              |
| 0.36           | 0.17           | 0.19           | 8.45                               | 12.82                              | 11.15                              | 31.77                              |
| 0.07           | 0.28           | 0.23           | 0.38                               | 2.66                               | 3.13                               | 38.69                              |
| 0.03           | 0.06           | 0.15           | 0.24                               | 1.30                               | 1.22                               | 25.73                              |
| 1.58           | 0.56           | 0.94           | 63.20                              | 61.66                              | 61.57                              | 67.52                              |
| 0.27           | 0.14           | 0.11           | 10.60                              | 12.44                              | 16.27                              | 25.82                              |
| 0.20           | 0.30           | 0.16           | 3.74                               | 5.57                               | 19.17                              | 35.40                              |
| 0.01           | 0.04           | 0.01           | 0.34                               | 1.68                               | 3.82                               | 16.33                              |
| 0.62           | 0.43           | 0.53           | 21.69                              | 24.94                              | 29.41                              | 51.55                              |
| 0.03           | 0.04           | 0.00           | 0.82                               | 1.30                               | 7.94                               | 16.15                              |
| 0.63           | 0.34           | 0.44           | 13.34                              | 22.22                              | 46.52                              | 50.13                              |
| 1.88           | 1.18           | 0.75           | 71.74                              | 71.24                              | 74.87                              | 75.95                              |
| 1.00           | 0.58           | 0.66           | 51.87                              | 51.75                              | 59.36                              | 59.36                              |
| 0.78           | 1.17           | 1.28           | 23.56                              | 38.99                              | 66.77                              | 68.50                              |
| 0.42           | 0.70           | 0.27           | 11.08                              | 19.43                              | 34.61                              | 51.73                              |
| 2.74           | 2.52           | 2.20           | 94.15                              | 90.67                              | 94.73                              | 94.76                              |
| 0.10           | 0.12           | 0.19           | 0.58                               | 1.23                               | 1.83                               | 19.61                              |
| 0.54           | 0.34           | 0.08           | 9.12                               | 19.82                              | 11.76                              | 29.64                              |
| 0.75           | 0.46           | 0.46           | 31.24                              | 32.64                              | 33.16                              | 40.28                              |
| 0.18           | 0.13           | 0.05           | 9.07                               | 13.28                              | 22.00                              | 27.86                              |
| 0.88           | 0.92           | 0.62           | 40.50                              | 43.65                              | 48.13                              | 53.06                              |
| 0.13           | 0.09           | 0.06           | 4.80                               | 5.38                               | 6.26                               | 14.64                              |
| 0.34           | 0.26           | 0.23           | 18.76                              | 17.88                              | 21.54                              | 28.13                              |
| 0.34           | 0.12           | 0.10           | 13.87                              | 15.28                              | 25.74                              | 30.97                              |
| 0.48           | 0.23           | 0.26           | 14.88                              | 14.05                              | 9.55                               | 26.35                              |
| 0.08           | 0.05           | 0.05           | 3.69                               | 5.31                               | 9.09                               | 15.17                              |
| 0.28           | 0.25           | 0.14           | 5.04                               | 7.45                               | 7.72                               | 19.79                              |
| 0.04           | 0.26           | 0.13           | 1.34                               | 1.81                               | 4.58                               | 20.41                              |
| 0.25           | 0.46           | 0.29           | 7.20                               | 14.05                              | 10.70                              | 36.91                              |

<https://jitc.bmj.com>



|    |      |      |      |       |       |       |       |
|----|------|------|------|-------|-------|-------|-------|
| 1  |      |      |      |       |       |       |       |
| 2  | 0.29 | 0.70 | 0.73 | 13.58 | 19.82 | 26.81 | 48.00 |
| 3  | 0.00 | 0.06 | 0.02 | 0.00  | 0.84  | 4.66  | 11.45 |
| 4  | 1.48 | 0.55 | 0.26 | 59.74 | 55.18 | 62.34 | 63.62 |
| 5  | 0.42 | 0.43 | 0.41 | 14.16 | 19.24 | 28.19 | 34.87 |
| 6  | 0.92 | 1.13 | 0.90 | 42.13 | 46.63 | 45.68 | 56.61 |
| 7  | 0.39 | 0.54 | 0.29 | 21.40 | 23.70 | 32.24 | 42.15 |
| 8  | 0.82 | 1.00 | 0.72 | 26.87 | 38.08 | 38.50 | 54.84 |
| 9  | 0.13 | 0.19 | 0.17 | 7.68  | 8.48  | 11.61 | 14.64 |
| 10 | 0.28 | 0.27 | 0.59 | 8.83  | 12.37 | 7.49  | 42.24 |
| 11 | 0.07 | 0.35 | 0.48 | 1.15  | 4.73  | 7.94  | 39.75 |
| 12 | 0.13 | 0.02 | 0.04 | 3.79  | 4.40  | 4.43  | 12.16 |
| 13 | 0.30 | 0.37 | 0.23 | 15.36 | 19.49 | 18.41 | 25.64 |
| 14 | 0.14 | 0.23 | 0.20 | 6.24  | 5.83  | 8.86  | 20.85 |
| 15 | 0.01 | 0.02 | 0.01 | 0.05  | 0.84  | 2.75  | 7.63  |
| 16 | 0.47 | 0.51 | 0.30 | 16.55 | 21.24 | 27.04 | 34.87 |
| 17 | 0.11 | 0.29 | 0.30 | 6.43  | 10.04 | 22.00 | 27.77 |
| 18 | 0.29 | 0.27 | 0.10 | 5.18  | 10.17 | 11.15 | 22.89 |
| 19 | 0.00 | 0.12 | 0.09 | 0.00  | 0.78  | 8.25  | 14.64 |
| 20 | 0.33 | 0.20 | 0.44 | 18.47 | 19.11 | 20.93 | 37.18 |
| 21 | 1.05 | 1.01 | 0.62 | 38.29 | 42.55 | 37.66 | 64.33 |
| 22 | 0.13 | 0.10 | 0.13 | 3.17  | 4.79  | 5.58  | 19.25 |
| 23 | 0.29 | 0.26 | 0.22 | 16.12 | 19.37 | 19.79 | 22.89 |
| 24 | 0.37 | 0.46 | 0.48 | 8.01  | 15.22 | 17.57 | 35.67 |
| 25 | 0.23 | 0.09 | 0.32 | 8.97  | 9.20  | 13.60 | 18.54 |
| 26 | 0.39 | 0.33 | 0.22 | 12.43 | 20.60 | 29.49 | 34.69 |
| 27 | 0.00 | 0.01 | 0.05 | 0.00  | 0.13  | 1.30  | 10.83 |
| 28 | 0.14 | 0.14 | 0.16 | 5.61  | 7.19  | 3.82  | 20.94 |
| 29 | 0.38 | 0.26 | 0.31 | 12.57 | 14.12 | 25.52 | 29.81 |
| 30 | 0.77 | 0.72 | 0.33 | 22.12 | 31.54 | 15.05 | 43.03 |
| 31 | 0.03 | 0.21 | 0.04 | 0.67  | 0.91  | 1.22  | 18.10 |
| 32 | 0.01 | 0.01 | 0.04 | 0.29  | 0.13  | 0.46  | 7.10  |
| 33 | 0.10 | 0.04 | 0.02 | 5.23  | 8.55  | 8.63  | 11.89 |
| 34 | 0.36 | 0.28 | 0.24 | 12.24 | 15.03 | 13.60 | 21.30 |
| 35 | 1.05 | 0.87 | 0.54 | 43.91 | 45.60 | 45.91 | 55.90 |
| 36 | 0.01 | 0.02 | 0.08 | 0.00  | 0.32  | 0.46  | 12.07 |
| 37 | 0.12 | 0.04 | 0.03 | 4.94  | 6.99  | 8.40  | 10.91 |
| 38 | 0.44 | 0.53 | 0.37 | 9.40  | 11.79 | 8.02  | 40.99 |
| 39 | 0.02 | 0.04 | 0.03 | 0.82  | 1.81  | 1.68  | 7.72  |
| 40 | 0.15 | 0.17 | 0.11 | 7.01  | 8.61  | 11.54 | 14.20 |
| 41 | 0.40 | 1.03 | 1.09 | 3.89  | 13.54 | 22.69 | 51.82 |
| 42 | 0.09 | 0.08 | 0.08 | 3.89  | 4.92  | 6.42  | 10.03 |
| 43 | 0.31 | 0.26 | 0.22 | 15.69 | 18.91 | 15.58 | 24.58 |
| 44 | 0.06 | 0.02 | 0.06 | 2.06  | 1.62  | 1.60  | 9.23  |
| 45 | 0.03 | 0.07 | 0.05 | 0.58  | 0.71  | 2.98  | 8.34  |
| 46 | 0.40 | 0.80 | 0.78 | 9.98  | 18.39 | 32.01 | 51.29 |
| 47 | 0.55 | 0.48 | 0.67 | 24.18 | 30.38 | 42.63 | 51.91 |
| 48 | 0.25 | 0.25 | 0.04 | 8.97  | 13.54 | 20.02 | 23.34 |
| 49 | 0.04 | 0.16 | 0.14 | 1.63  | 4.66  | 16.73 | 20.94 |
| 50 | 0.00 | 0.02 | 0.01 | 0.05  | 0.71  | 2.98  | 5.86  |

<https://jitc.bmj.com>

|    |      |      |      |       |       |       |       |
|----|------|------|------|-------|-------|-------|-------|
| 1  |      |      |      |       |       |       |       |
| 2  | 0.30 | 0.21 | 0.14 | 12.91 | 12.82 | 11.38 | 19.08 |
| 3  | 0.46 | 0.47 | 0.70 | 15.21 | 22.67 | 17.88 | 39.93 |
| 4  | 0.32 | 0.78 | 0.66 | 11.56 | 20.98 | 35.37 | 44.99 |
| 5  | 0.84 | 0.90 | 0.82 | 24.38 | 31.41 | 25.21 | 53.15 |
| 6  | 0.02 | 0.13 | 0.12 | 1.44  | 2.72  | 7.33  | 10.47 |
| 7  | 0.33 | 0.20 | 0.19 | 11.13 | 13.47 | 16.35 | 21.83 |
| 8  | 0.19 | 0.06 | 0.10 | 8.93  | 12.82 | 15.20 | 18.19 |
| 9  | 0.06 | 0.17 | 0.10 | 2.64  | 3.76  | 8.40  | 14.11 |
| 10 | 3.11 | 3.12 | 1.80 | 95.11 | 96.11 | 97.25 | 96.54 |
| 11 | 0.43 | 0.46 | 0.45 | 15.69 | 21.18 | 19.02 | 34.16 |
| 12 | 0.10 | 0.12 | 0.02 | 0.34  | 0.84  | 0.69  | 12.07 |
| 13 | 0.10 | 0.03 | 0.05 | 3.98  | 6.09  | 11.31 | 11.09 |
| 14 | 0.25 | 0.12 | 0.08 | 9.60  | 10.88 | 12.53 | 16.50 |
| 15 | 0.00 | 0.00 | 0.00 | 0.00  | 0.00  | 0.08  | 1.69  |
| 16 | 0.07 | 0.08 | 0.04 | 1.63  | 2.33  | 0.92  | 9.67  |
| 17 | 0.63 | 0.44 | 0.35 | 23.85 | 26.04 | 34.61 | 36.56 |
| 18 | 0.19 | 0.14 | 0.16 | 6.14  | 6.09  | 2.52  | 14.55 |
| 19 | 0.11 | 0.08 | 0.07 | 6.77  | 6.93  | 10.77 | 11.18 |
| 20 | 0.24 | 0.08 | 0.06 | 11.80 | 13.99 | 12.61 | 15.62 |
| 21 | 0.12 | 0.24 | 0.08 | 7.15  | 9.13  | 7.56  | 18.90 |
| 22 | 0.31 | 0.22 | 0.17 | 15.79 | 14.83 | 11.00 | 19.70 |
| 23 | 0.12 | 0.13 | 0.13 | 4.46  | 7.25  | 9.32  | 13.04 |
| 24 | 0.81 | 0.63 | 0.62 | 32.39 | 34.26 | 37.89 | 38.69 |
| 25 | 0.04 | 0.03 | 0.15 | 1.68  | 6.80  | 24.68 | 23.78 |
| 26 | 0.22 | 0.33 | 0.32 | 10.27 | 11.72 | 16.12 | 24.49 |
| 27 | 0.04 | 0.07 | 0.20 | 2.40  | 2.78  | 3.67  | 16.86 |
| 28 | 0.09 | 0.06 | 0.05 | 3.93  | 4.79  | 5.19  | 8.96  |
| 29 | 0.16 | 0.19 | 0.16 | 9.12  | 10.23 | 18.72 | 21.03 |
| 30 | 0.01 | 0.02 | 0.14 | 0.14  | 0.26  | 0.38  | 11.80 |
| 31 | 0.44 | 0.97 | 1.25 | 11.42 | 35.04 | 51.34 | 65.84 |
| 32 | 0.00 | 0.01 | 0.07 | 0.10  | 0.45  | 1.60  | 8.78  |
| 33 | 0.14 | 0.09 | 0.28 | 3.31  | 4.79  | 8.56  | 17.92 |
| 34 | 0.12 | 0.07 | 0.03 | 3.60  | 6.80  | 19.63 | 22.01 |
| 35 | 0.40 | 0.58 | 0.44 | 15.83 | 23.77 | 29.49 | 37.62 |
| 36 | 0.00 | 0.01 | 0.00 | 0.10  | 0.71  | 1.07  | 3.55  |
| 37 | 0.02 | 0.02 | 0.05 | 0.00  | 0.39  | 0.23  | 6.92  |
| 38 | 0.12 | 0.09 | 0.20 | 5.57  | 7.71  | 11.69 | 18.19 |
| 39 | 0.02 | 0.02 | 0.04 | 2.16  | 1.49  | 3.13  | 4.88  |
| 40 | 0.21 | 0.18 | 0.16 | 10.84 | 13.73 | 21.01 | 23.69 |
| 41 | 0.17 | 0.11 | 0.09 | 3.17  | 4.79  | 7.18  | 10.29 |
| 42 | 0.21 | 0.32 | 0.29 | 10.27 | 15.28 | 15.05 | 21.12 |
| 43 | 0.05 | 0.08 | 0.03 | 1.49  | 2.46  | 5.19  | 8.25  |
| 44 | 1.40 | 0.86 | 0.37 | 39.44 | 36.53 | 42.02 | 59.18 |
| 45 | 0.72 | 0.49 | 0.51 | 33.25 | 38.21 | 48.97 | 46.32 |
| 46 | 0.79 | 0.98 | 1.12 | 48.90 | 44.62 | 55.69 | 60.34 |
| 47 | 0.05 | 0.06 | 0.08 | 3.60  | 3.24  | 4.05  | 6.48  |
| 48 | 0.04 | 0.09 | 0.02 | 1.34  | 2.85  | 1.53  | 6.03  |
| 49 | 0.15 | 0.14 | 0.14 | 3.93  | 9.00  | 22.46 | 22.72 |
| 50 | 0.28 | 0.20 | 0.14 | 11.66 | 14.44 | 17.57 | 19.34 |

1  
2  
3  
4  
5  
6  
7  
8  
9  
10  
11  
12  
13  
14  
15  
16  
17  
18  
19  
20  
21  
22  
23  
24  
25  
26  
27  
28  
29  
30  
31  
32  
33  
34  
35  
36  
37  
38  
39  
40  
41  
42  
43  
44  
45  
46  
47  
48  
49  
50  
51  
52  
53  
54  
55  
56  
57  
58  
59  
60

|      |      |      |       |       |       |       |
|------|------|------|-------|-------|-------|-------|
| 0.03 | 0.02 | 0.03 | 1.49  | 2.33  | 3.97  | 5.06  |
| 0.30 | 0.16 | 0.13 | 17.08 | 16.26 | 19.25 | 19.52 |
| 0.77 | 0.66 | 0.63 | 30.47 | 38.67 | 42.78 | 44.54 |
| 0.06 | 0.01 | 0.01 | 1.97  | 2.72  | 1.76  | 5.50  |
| 2.50 | 2.39 | 1.47 | 72.70 | 79.66 | 77.54 | 91.75 |
| 0.08 | 0.61 | 0.51 | 2.02  | 8.35  | 55.92 | 53.77 |
| 0.07 | 0.10 | 0.10 | 3.93  | 5.25  | 9.47  | 11.62 |
| 0.68 | 0.44 | 0.54 | 31.72 | 36.66 | 39.72 | 37.18 |
| 0.22 | 0.28 | 0.30 | 11.23 | 12.18 | 17.95 | 22.63 |

| Percent cells expressing cluster 4 | Percent cells expressing cluster 5 | Percent cells expressing cluster 6 | Mean expression of expressing cells cluster 0 | Mean expression of expressing cells cluster 1 | Mean expression of expressing cells cluster |
|------------------------------------|------------------------------------|------------------------------------|-----------------------------------------------|-----------------------------------------------|---------------------------------------------|
| 39.96                              | 17.18                              | 26.57                              | 1.98                                          | 1.85                                          | 1.83                                        |
| 100.00                             | 99.88                              | 100.00                             | 4.93                                          | 4.98                                          | 4.94                                        |
| 0.27                               | 1.61                               | 3.70                               | 1.31                                          | 1.68                                          | 1.95                                        |
| 18.64                              | 10.63                              | 24.64                              | 1.83                                          | 1.76                                          | 1.76                                        |
| 43.00                              | 39.80                              | 21.42                              | 1.93                                          | 1.98                                          | 1.96                                        |
| 92.51                              | 63.91                              | 66.83                              | 2.75                                          | 2.61                                          | 2.73                                        |
| 0.45                               | 0.25                               | 0.32                               | 1.66                                          | 2.16                                          | 1.97                                        |
| 7.58                               | 6.06                               | 4.03                               | 1.62                                          | 1.69                                          | 1.72                                        |
| 2.50                               | 0.87                               | 0.97                               | 1.84                                          | 1.60                                          | 1.69                                        |
| 53.79                              | 33.99                              | 30.92                              | 1.93                                          | 1.91                                          | 1.80                                        |
| 84.12                              | 53.15                              | 67.15                              | 2.62                                          | 2.51                                          | 2.51                                        |
| 2.68                               | 7.66                               | 8.21                               | 1.91                                          | 1.76                                          | 1.59                                        |
| 16.41                              | 6.18                               | 4.83                               | 1.80                                          | 1.56                                          | 1.66                                        |
| 19.36                              | 7.79                               | 8.53                               | 1.86                                          | 1.78                                          | 1.91                                        |
| 4.01                               | 12.98                              | 11.59                              | 1.95                                          | 1.92                                          | 1.91                                        |
| 1.61                               | 2.72                               | 5.80                               | 2.45                                          | 1.86                                          | 2.04                                        |
| 71.99                              | 24.35                              | 36.55                              | 2.23                                          | 2.18                                          | 2.12                                        |
| 16.77                              | 7.17                               | 5.64                               | 1.75                                          | 1.61                                          | 1.66                                        |
| 11.60                              | 13.60                              | 7.89                               | 1.80                                          | 1.61                                          | 1.69                                        |
| 0.80                               | 2.35                               | 0.81                               | 1.97                                          | 1.60                                          | 1.62                                        |
| 34.70                              | 19.41                              | 24.64                              | 1.80                                          | 1.73                                          | 1.82                                        |
| 1.52                               | 2.22                               | 0.16                               | 1.80                                          | 1.75                                          | 1.74                                        |
| 26.14                              | 13.35                              | 16.91                              | 2.28                                          | 2.21                                          | 2.36                                        |
| 82.52                              | 48.45                              | 35.59                              | 2.31                                          | 2.28                                          | 2.28                                        |
| 53.35                              | 26.21                              | 30.76                              | 2.06                                          | 1.95                                          | 2.07                                        |
| 40.86                              | 45.36                              | 51.69                              | 1.92                                          | 2.04                                          | 2.21                                        |
| 23.28                              | 29.54                              | 13.85                              | 1.83                                          | 1.85                                          | 1.88                                        |
| 94.11                              | 84.55                              | 77.78                              | 3.03                                          | 2.99                                          | 3.01                                        |
| 3.93                               | 4.08                               | 6.12                               | 2.11                                          | 2.07                                          | 2.50                                        |
| 28.10                              | 14.59                              | 4.03                               | 1.89                                          | 1.92                                          | 1.82                                        |
| 41.75                              | 21.01                              | 22.06                              | 1.91                                          | 1.83                                          | 1.87                                        |
| 11.06                              | 6.67                               | 2.90                               | 1.73                                          | 1.63                                          | 1.69                                        |
| 47.64                              | 37.82                              | 29.95                              | 1.95                                          | 1.91                                          | 1.93                                        |
| 7.85                               | 4.57                               | 3.06                               | 1.73                                          | 1.52                                          | 1.53                                        |
| 20.70                              | 12.36                              | 12.08                              | 1.80                                          | 1.63                                          | 1.73                                        |
| 20.96                              | 6.30                               | 5.64                               | 1.76                                          | 1.64                                          | 1.69                                        |
| 27.12                              | 11.00                              | 12.56                              | 1.77                                          | 1.62                                          | 1.68                                        |
| 5.08                               | 2.72                               | 2.58                               | 1.71                                          | 1.60                                          | 1.64                                        |
| 15.97                              | 11.25                              | 7.41                               | 1.73                                          | 1.60                                          | 1.70                                        |
| 2.05                               | 11.25                              | 6.76                               | 1.75                                          | 1.79                                          | 1.80                                        |
| 13.47                              | 19.90                              | 14.17                              | 1.81                                          | 1.84                                          | 1.69                                        |

<https://jitc.bmj.com>

|    |       |       |       |      |      |      |
|----|-------|-------|-------|------|------|------|
| 1  |       |       |       |      |      |      |
| 2  | 17.22 | 30.04 | 31.24 | 1.78 | 1.74 | 1.75 |
| 3  | 0.27  | 2.97  | 1.13  | NA   | 1.77 | 1.61 |
| 4  | 67.62 | 23.73 | 12.72 | 2.23 | 2.20 | 2.27 |
| 5  | 24.89 | 19.53 | 20.13 | 1.72 | 1.70 | 1.79 |
| 6  | 47.90 | 45.98 | 40.74 | 2.03 | 2.00 | 1.97 |
| 7  | 22.39 | 23.86 | 14.49 | 1.86 | 1.84 | 1.92 |
| 8  | 44.25 | 42.27 | 33.17 | 1.84 | 1.88 | 1.84 |
| 9  | 7.76  | 8.90  | 8.53  | 1.76 | 1.60 | 1.57 |
| 10 | 15.97 | 11.74 | 24.96 | 1.81 | 1.68 | 1.55 |
| 11 | 3.75  | 15.33 | 22.71 | 1.70 | 1.84 | 1.79 |
| 12 | 8.30  | 1.24  | 2.25  | 1.77 | 1.51 | 1.70 |
| 13 | 17.93 | 16.81 | 11.43 | 1.74 | 1.61 | 1.68 |
| 14 | 8.21  | 10.51 | 9.66  | 1.79 | 1.82 | 1.89 |
| 15 | 0.36  | 1.36  | 0.48  | 1.21 | 1.96 | 1.78 |
| 16 | 26.76 | 22.99 | 14.98 | 1.83 | 1.72 | 1.79 |
| 17 | 6.87  | 13.10 | 14.81 | 1.74 | 1.71 | 1.78 |
| 18 | 16.41 | 11.99 | 5.48  | 1.80 | 1.64 | 1.68 |
| 19 | 0.18  | 5.32  | 4.83  | NA   | 2.26 | 1.89 |
| 20 | 19.80 | 9.64  | 20.61 | 1.81 | 1.66 | 1.67 |
| 21 | 52.54 | 42.03 | 28.99 | 1.94 | 1.87 | 1.88 |
| 22 | 7.49  | 4.94  | 6.92  | 1.91 | 1.69 | 1.62 |
| 23 | 17.48 | 12.86 | 11.43 | 1.76 | 1.65 | 1.72 |
| 24 | 20.87 | 20.02 | 21.10 | 1.80 | 1.81 | 1.85 |
| 25 | 13.56 | 4.20  | 14.33 | 1.75 | 1.65 | 1.69 |
| 26 | 22.84 | 15.70 | 10.63 | 1.82 | 1.73 | 1.79 |
| 27 | 0.00  | 0.49  | 2.90  | NA   | 1.59 | 1.96 |
| 28 | 8.74  | 7.17  | 8.21  | 1.69 | 1.64 | 1.64 |
| 29 | 21.68 | 12.98 | 15.14 | 1.84 | 1.66 | 1.76 |
| 30 | 40.86 | 30.90 | 15.62 | 1.90 | 1.89 | 1.80 |
| 31 | 1.96  | 9.27  | 2.09  | 1.99 | 1.60 | 1.77 |
| 32 | 0.36  | 0.74  | 1.61  | 1.92 | 1.61 | 1.63 |
| 33 | 6.51  | 2.47  | 0.81  | 1.70 | 1.57 | 1.55 |
| 34 | 21.14 | 13.23 | 12.40 | 1.80 | 1.66 | 1.70 |
| 35 | 54.50 | 37.58 | 26.25 | 1.94 | 1.86 | 1.88 |
| 36 | 0.54  | 0.74  | 4.03  | NA   | 2.15 | 1.55 |
| 37 | 7.31  | 1.98  | 2.09  | 1.66 | 1.60 | 1.52 |
| 38 | 24.71 | 24.23 | 17.55 | 1.75 | 1.72 | 1.72 |
| 39 | 1.52  | 1.85  | 1.45  | 1.98 | 1.63 | 1.53 |
| 40 | 9.19  | 8.03  | 5.80  | 1.70 | 1.60 | 1.66 |
| 41 | 20.70 | 39.93 | 43.80 | 1.89 | 1.99 | 1.87 |
| 42 | 5.44  | 4.08  | 4.19  | 1.64 | 1.64 | 1.60 |
| 43 | 18.64 | 12.61 | 10.63 | 1.77 | 1.68 | 1.69 |
| 44 | 3.57  | 1.24  | 2.90  | 1.68 | 1.64 | 1.63 |
| 45 | 1.87  | 3.21  | 2.42  | 1.52 | 1.50 | 1.72 |
| 46 | 23.02 | 33.87 | 34.94 | 1.81 | 1.80 | 1.86 |
| 47 | 31.31 | 22.74 | 32.53 | 1.87 | 1.78 | 1.89 |
| 48 | 14.99 | 11.62 | 2.09  | 1.73 | 1.61 | 1.73 |
| 49 | 2.23  | 7.79  | 7.09  | 1.68 | 1.69 | 1.72 |
| 50 | 0.00  | 1.11  | 0.32  | 2.08 | 1.92 | 1.56 |

<https://jitc.bmj.com>

|    |       |       |       |      |      |      |
|----|-------|-------|-------|------|------|------|
| 1  |       |       |       |      |      |      |
| 2  | 17.40 | 10.26 | 7.09  | 1.77 | 1.69 | 1.68 |
| 3  | 25.69 | 20.64 | 29.79 | 1.86 | 1.81 | 1.82 |
| 4  | 18.82 | 33.87 | 29.95 | 1.77 | 1.78 | 1.86 |
| 5  | 44.51 | 38.57 | 37.04 | 1.87 | 1.78 | 1.81 |
| 6  | 1.69  | 6.06  | 6.12  | 1.66 | 1.80 | 1.78 |
| 7  | 19.45 | 9.64  | 9.50  | 1.78 | 1.69 | 1.72 |
| 8  | 11.60 | 3.58  | 5.15  | 1.78 | 1.69 | 1.67 |
| 9  | 3.66  | 8.03  | 5.15  | 1.71 | 1.75 | 1.62 |
| 10 | 98.31 | 91.84 | 67.63 | 3.04 | 3.26 | 3.39 |
| 11 | 24.71 | 21.26 | 21.90 | 1.83 | 1.79 | 1.73 |
| 12 | 5.08  | 5.44  | 0.97  | 1.66 | 2.09 | 1.61 |
| 13 | 5.98  | 2.10  | 2.90  | 1.72 | 1.56 | 1.66 |
| 14 | 14.90 | 5.69  | 4.19  | 1.75 | 1.65 | 1.60 |
| 15 | 0.00  | 0.00  | 0.00  | NA   | NA   | 2.45 |
| 16 | 4.01  | 3.83  | 2.42  | 1.80 | 1.49 | 1.66 |
| 17 | 34.97 | 20.15 | 18.20 | 1.83 | 1.79 | 1.84 |
| 18 | 11.15 | 6.92  | 7.73  | 1.80 | 1.61 | 1.62 |
| 19 | 6.69  | 4.20  | 4.19  | 1.70 | 1.56 | 1.57 |
| 20 | 14.99 | 4.82  | 3.70  | 1.76 | 1.62 | 1.61 |
| 21 | 6.78  | 11.62 | 4.35  | 1.75 | 1.70 | 1.70 |
| 22 | 18.82 | 10.75 | 8.53  | 1.78 | 1.65 | 1.63 |
| 23 | 7.40  | 6.55  | 6.76  | 1.72 | 1.59 | 1.64 |
| 24 | 44.87 | 27.94 | 28.99 | 1.87 | 1.81 | 1.82 |
| 25 | 2.50  | 1.36  | 8.05  | 1.77 | 1.67 | 1.76 |
| 26 | 13.47 | 15.08 | 15.78 | 1.73 | 1.71 | 1.66 |
| 27 | 2.68  | 3.21  | 9.98  | 1.75 | 1.65 | 1.59 |
| 28 | 5.35  | 3.34  | 3.06  | 1.67 | 1.62 | 1.62 |
| 29 | 9.90  | 8.65  | 8.37  | 1.75 | 1.65 | 1.75 |
| 30 | 0.89  | 1.36  | 5.96  | 1.80 | 2.16 | 1.89 |
| 31 | 25.33 | 39.43 | 50.56 | 1.90 | 2.01 | 2.15 |
| 32 | 0.18  | 0.87  | 3.38  | 2.06 | 1.87 | 1.70 |
| 33 | 7.23  | 3.58  | 10.47 | 2.02 | 1.78 | 2.16 |
| 34 | 7.23  | 3.96  | 1.61  | 1.77 | 1.53 | 1.74 |
| 35 | 23.28 | 26.08 | 21.74 | 1.81 | 1.79 | 1.79 |
| 36 | 0.09  | 0.62  | 0.00  | 2.04 | 1.96 | 1.44 |
| 37 | 0.80  | 0.87  | 2.25  | NA   | 1.93 | 2.29 |
| 38 | 7.31  | 4.08  | 9.82  | 1.69 | 1.60 | 1.68 |
| 39 | 1.52  | 0.87  | 1.77  | 1.75 | 1.64 | 1.49 |
| 40 | 13.02 | 9.64  | 8.70  | 1.71 | 1.65 | 1.75 |
| 41 | 9.99  | 5.07  | 4.35  | 1.82 | 1.73 | 1.72 |
| 42 | 12.22 | 15.08 | 13.85 | 1.75 | 1.70 | 1.71 |
| 43 | 3.03  | 3.83  | 1.45  | 1.58 | 1.73 | 1.69 |
| 44 | 64.23 | 33.50 | 17.07 | 2.05 | 1.94 | 2.02 |
| 45 | 39.79 | 22.99 | 24.80 | 1.90 | 1.84 | 1.90 |
| 46 | 41.12 | 39.80 | 45.09 | 2.11 | 2.03 | 2.29 |
| 47 | 3.84  | 2.72  | 4.03  | 1.68 | 1.54 | 1.50 |
| 48 | 2.85  | 4.20  | 1.13  | 1.75 | 1.72 | 1.72 |
| 49 | 8.47  | 6.92  | 7.57  | 1.72 | 1.66 | 1.77 |
| 50 | 17.93 | 9.52  | 7.25  | 1.73 | 1.61 | 1.69 |

<https://jitc.bmj.com>

1  
2  
3  
4  
5  
6  
7  
8  
9  
10  
11  
12  
13  
14  
15  
16  
17  
18  
19  
20  
21  
22  
23  
24  
25  
26  
27  
28  
29  
30  
31  
32  
33  
34  
35  
36  
37  
38  
39  
40  
41  
42  
43  
44  
45  
46  
47  
48  
49  
50  
51  
52  
53  
54  
55  
56  
57  
58  
59  
60

|       |       |       |      |      |      |
|-------|-------|-------|------|------|------|
| 2.05  | 1.24  | 1.29  | 1.73 | 1.66 | 1.54 |
| 18.64 | 8.41  | 7.57  | 1.76 | 1.65 | 1.69 |
| 42.11 | 29.05 | 29.15 | 1.87 | 1.81 | 1.92 |
| 3.75  | 0.74  | 0.48  | 1.71 | 1.44 | 1.66 |
| 92.51 | 80.47 | 59.90 | 2.34 | 2.50 | 2.41 |
| 4.37  | 25.96 | 23.35 | 1.85 | 1.90 | 2.14 |
| 4.91  | 4.20  | 5.15  | 1.72 | 1.67 | 1.72 |
| 37.73 | 20.64 | 25.76 | 1.85 | 1.81 | 1.81 |
| 13.11 | 13.47 | 14.49 | 1.75 | 1.66 | 1.73 |

1  
2  
3  
4  
5  
6  
7  
8  
9  
10  
11  
12  
13  
14  
15  
16  
17  
18  
19  
20  
21  
22  
23  
24  
25  
26  
27  
28  
29  
30  
31  
32  
33  
34  
35  
36  
37  
38  
39  
40  
41  
42  
43  
44  
45  
46  
47  
48  
49  
50  
51  
52  
53  
54  
55  
56  
57  
58  
59  
60

| Mean expression of expressing cells cluster 3 | Mean expression of expressing cells cluster | Mean expression of expressing cells cluster 5 | Mean expression of expressing cells cluster |
|-----------------------------------------------|---------------------------------------------|-----------------------------------------------|---------------------------------------------|
| 2.64                                          | 1.93                                        | 2.33                                          | 2.52                                        |
| 5.35                                          | 5.08                                        | 4.86                                          | 4.73                                        |
| 2.34                                          | 1.44                                        | 1.85                                          | 2.03                                        |
| 2.55                                          | 1.84                                        | 2.41                                          | 2.44                                        |
| 2.55                                          | 1.99                                        | 2.44                                          | 2.25                                        |
| 2.94                                          | 2.65                                        | 2.68                                          | 2.57                                        |
| 2.77                                          | 1.41                                        | 1.58                                          | 1.45                                        |
| 1.99                                          | 1.63                                        | 1.93                                          | 2.05                                        |
| 1.88                                          | 1.75                                        | 1.89                                          | 1.69                                        |
| 2.26                                          | 1.94                                        | 2.34                                          | 2.34                                        |
| 2.91                                          | 2.50                                        | 2.59                                          | 2.82                                        |
| 1.91                                          | 1.65                                        | 2.05                                          | 1.99                                        |
| 2.05                                          | 1.74                                        | 1.98                                          | 2.08                                        |
| 2.23                                          | 1.84                                        | 2.15                                          | 2.20                                        |
| 2.03                                          | 1.77                                        | 2.17                                          | 1.97                                        |
| 2.46                                          | 2.05                                        | 2.19                                          | 2.59                                        |
| 2.57                                          | 2.20                                        | 2.28                                          | 2.58                                        |
| 1.91                                          | 1.63                                        | 1.97                                          | 1.99                                        |
| 2.03                                          | 1.69                                        | 2.23                                          | 1.98                                        |
| 1.85                                          | 1.70                                        | 1.88                                          | 1.59                                        |
| 2.21                                          | 1.80                                        | 2.21                                          | 2.15                                        |
| 2.03                                          | 1.74                                        | 1.86                                          | 1.23                                        |
| 2.70                                          | 2.41                                        | 2.57                                          | 2.58                                        |
| 2.50                                          | 2.27                                        | 2.44                                          | 2.12                                        |
| 2.28                                          | 1.88                                        | 2.21                                          | 2.16                                        |
| 2.46                                          | 1.90                                        | 2.57                                          | 2.47                                        |
| 2.27                                          | 1.80                                        | 2.36                                          | 1.94                                        |
| 3.16                                          | 2.91                                        | 2.98                                          | 2.82                                        |
| 3.10                                          | 2.66                                        | 2.97                                          | 3.04                                        |
| 2.25                                          | 1.92                                        | 2.33                                          | 2.06                                        |
| 2.04                                          | 1.81                                        | 2.19                                          | 2.06                                        |
| 1.86                                          | 1.60                                        | 1.93                                          | 1.66                                        |
| 2.14                                          | 1.84                                        | 2.42                                          | 2.06                                        |
| 1.82                                          | 1.64                                        | 1.98                                          | 1.89                                        |
| 1.89                                          | 1.66                                        | 2.13                                          | 1.92                                        |
| 1.87                                          | 1.63                                        | 1.96                                          | 1.79                                        |
| 2.11                                          | 1.78                                        | 2.13                                          | 2.04                                        |
| 1.73                                          | 1.57                                        | 1.84                                          | 1.80                                        |
| 1.96                                          | 1.74                                        | 2.27                                          | 1.93                                        |
| 2.02                                          | 1.74                                        | 2.33                                          | 1.94                                        |
| 2.08                                          | 1.85                                        | 2.31                                          | 2.04                                        |

<https://jitc.bmj.com>



|    |      |      |      |      |
|----|------|------|------|------|
| 1  |      |      |      |      |
| 2  | 2.17 | 1.70 | 2.32 | 2.34 |
| 3  | 1.85 | 1.86 | 2.01 | 1.78 |
| 4  | 2.47 | 2.19 | 2.32 | 2.01 |
| 5  | 1.95 | 1.67 | 2.20 | 2.01 |
| 6  | 2.17 | 1.92 | 2.45 | 2.22 |
| 7  | 2.11 | 1.72 | 2.28 | 2.00 |
| 8  | 2.13 | 1.85 | 2.37 | 2.17 |
| 9  | 1.74 | 1.61 | 2.18 | 1.96 |
| 10 | 2.28 | 1.77 | 2.27 | 2.36 |
| 11 | 2.12 | 1.78 | 2.31 | 2.12 |
| 12 | 1.72 | 1.57 | 1.55 | 1.70 |
| 13 | 1.88 | 1.66 | 2.21 | 2.03 |
| 14 | 2.03 | 1.70 | 2.20 | 2.11 |
| 15 | 2.16 | 1.75 | 1.80 | 1.70 |
| 16 | 1.91 | 1.75 | 2.21 | 1.98 |
| 17 | 1.93 | 1.56 | 2.21 | 2.05 |
| 18 | 1.97 | 1.74 | 2.22 | 1.88 |
| 19 | 2.04 | 1.88 | 2.34 | 1.93 |
| 20 | 2.13 | 1.64 | 2.04 | 2.15 |
| 21 | 2.35 | 2.00 | 2.40 | 2.14 |
| 22 | 1.86 | 1.73 | 1.97 | 1.93 |
| 23 | 1.80 | 1.67 | 2.06 | 1.91 |
| 24 | 2.11 | 1.78 | 2.30 | 2.29 |
| 25 | 1.80 | 1.71 | 2.04 | 2.20 |
| 26 | 1.92 | 1.72 | 2.13 | 2.03 |
| 27 | 2.02 | NA   | 2.05 | 1.87 |
| 28 | 1.89 | 1.63 | 1.98 | 1.91 |
| 29 | 1.88 | 1.73 | 2.03 | 2.07 |
| 30 | 2.10 | 1.88 | 2.32 | 2.12 |
| 31 | 2.07 | 1.62 | 2.30 | 1.93 |
| 32 | 2.07 | 1.46 | 1.78 | 2.22 |
| 33 | 1.71 | 1.56 | 1.59 | 2.03 |
| 34 | 1.85 | 1.70 | 2.11 | 1.95 |
| 35 | 2.10 | 1.92 | 2.31 | 2.04 |
| 36 | 1.90 | 1.41 | 2.21 | 1.91 |
| 37 | 1.74 | 1.64 | 1.86 | 1.52 |
| 38 | 2.11 | 1.77 | 2.21 | 2.09 |
| 39 | 1.72 | 1.60 | 1.93 | 1.75 |
| 40 | 1.80 | 1.62 | 2.13 | 1.84 |
| 41 | 2.25 | 1.94 | 2.58 | 2.49 |
| 42 | 1.66 | 1.66 | 1.92 | 1.87 |
| 43 | 1.89 | 1.69 | 2.10 | 2.05 |
| 44 | 1.95 | 1.68 | 1.89 | 2.05 |
| 45 | 1.75 | 1.64 | 2.12 | 1.96 |
| 46 | 2.23 | 1.76 | 2.36 | 2.23 |
| 47 | 2.08 | 1.76 | 2.11 | 2.07 |
| 48 | 1.88 | 1.68 | 2.15 | 1.70 |
| 49 | 1.83 | 1.71 | 2.01 | 1.99 |
| 50 | 1.76 | NA   | 2.21 | 2.06 |

<https://jitc.bmj.com>

|    |      |      |      |      |
|----|------|------|------|------|
| 1  |      |      |      |      |
| 2  | 1.82 | 1.70 | 2.08 | 1.95 |
| 3  | 2.16 | 1.80 | 2.26 | 2.35 |
| 4  | 2.11 | 1.71 | 2.32 | 2.21 |
| 5  | 2.15 | 1.89 | 2.34 | 2.21 |
| 6  | 1.77 | 1.42 | 2.10 | 2.01 |
| 7  | 1.85 | 1.72 | 2.11 | 2.05 |
| 8  | 1.80 | 1.62 | 1.81 | 1.97 |
| 9  | 1.82 | 1.61 | 2.10 | 1.90 |
| 10 |      |      |      |      |
| 11 | 3.50 | 3.16 | 3.40 | 2.66 |
| 12 | 1.98 | 1.75 | 2.15 | 2.05 |
| 13 | 1.96 | 1.88 | 2.19 | 2.21 |
| 14 | 1.91 | 1.63 | 1.64 | 1.75 |
| 15 | 1.78 | 1.65 | 2.05 | 1.92 |
| 16 | 1.86 | NA   | NA   | NA   |
| 17 | 1.91 | 1.71 | 2.08 | 1.79 |
| 18 | 1.98 | 1.79 | 2.20 | 1.93 |
| 19 | 1.80 | 1.71 | 2.01 | 2.01 |
| 20 | 1.80 | 1.59 | 1.92 | 1.77 |
| 21 | 1.77 | 1.63 | 1.72 | 1.75 |
| 22 | 1.83 | 1.74 | 2.07 | 1.92 |
| 23 | 1.81 | 1.64 | 2.00 | 1.97 |
| 24 | 1.86 | 1.67 | 2.02 | 1.96 |
| 25 | 1.97 | 1.81 | 2.24 | 2.12 |
| 26 | 1.96 | 1.59 | 1.85 | 1.92 |
| 27 | 1.88 | 1.61 | 2.22 | 2.06 |
| 28 | 2.12 | 1.60 | 2.03 | 2.01 |
| 29 | 1.73 | 1.66 | 1.88 | 1.65 |
| 30 | 1.95 | 1.63 | 2.15 | 1.89 |
| 31 | 2.01 | 1.58 | 1.79 | 2.30 |
| 32 | 2.36 | 1.75 | 2.46 | 2.47 |
| 33 | 1.86 | 2.09 | 1.70 | 2.09 |
| 34 | 2.36 | 1.99 | 2.43 | 2.65 |
| 35 | 1.87 | 1.63 | 1.88 | 1.73 |
| 36 | 2.01 | 1.70 | 2.22 | 2.01 |
| 37 | 1.76 | 1.91 | 1.47 | NA   |
| 38 | 2.29 | 2.24 | 2.43 | 2.37 |
| 39 | 1.79 | 1.59 | 2.18 | 2.03 |
| 40 | 1.73 | 1.61 | 1.76 | 2.00 |
| 41 | 1.84 | 1.58 | 1.91 | 1.88 |
| 42 | 1.98 | 1.71 | 2.14 | 2.16 |
| 43 | 1.92 | 1.68 | 2.12 | 2.08 |
| 44 | 1.88 | 1.54 | 2.04 | 2.05 |
| 45 | 2.31 | 2.19 | 2.56 | 2.18 |
| 46 | 2.03 | 1.81 | 2.12 | 2.04 |
| 47 | 2.38 | 1.92 | 2.46 | 2.48 |
| 48 | 1.65 | 1.42 | 2.05 | 1.98 |
| 49 | 1.80 | 1.51 | 2.20 | 1.84 |
| 50 | 1.95 | 1.77 | 2.07 | 1.85 |
| 51 | 1.81 | 1.58 | 2.08 | 1.88 |
| 52 |      |      |      |      |
| 53 |      |      |      |      |
| 54 |      |      |      |      |
| 55 |      |      |      |      |
| 56 |      |      |      |      |
| 57 |      |      |      |      |
| 58 |      |      |      |      |
| 59 |      |      |      |      |
| 60 |      |      |      |      |

1  
2  
3  
4  
5  
6  
7  
8  
9  
10  
11  
12  
13  
14  
15  
16  
17  
18  
19  
20  
21  
22  
23  
24  
25  
26  
27  
28  
29  
30  
31  
32  
33  
34  
35  
36  
37  
38  
39  
40  
41  
42  
43  
44  
45  
46  
47  
48  
49  
50  
51  
52  
53  
54  
55  
56  
57  
58  
59  
60

|      |      |      |      |
|------|------|------|------|
| 1.75 | 1.57 | 1.67 | 2.04 |
| 1.83 | 1.62 | 1.95 | 1.78 |
| 2.04 | 1.82 | 2.27 | 2.16 |
| 1.78 | 1.67 | 1.17 | 1.73 |
| 2.95 | 2.70 | 2.98 | 2.46 |
| 2.31 | 1.81 | 2.35 | 2.17 |
| 1.91 | 1.52 | 2.31 | 1.92 |
| 1.94 | 1.79 | 2.13 | 2.09 |
| 1.88 | 1.67 | 2.08 | 2.07 |

**Table 4: Weighted co-expression analysis of 'cluster 3 enriched transcripts' in purif**

| Edges   |          |        |            | Noc      |
|---------|----------|--------|------------|----------|
| Source  | Target   | weight | Type       | Node     |
| HSPA1A  | HSPA1B   | 0.42   | undirected | HSPA1A   |
| HSPA1A  | HSPB1    | 0.09   | undirected | B2M      |
| HSPA1A  | ARRDC3   | 0.09   | undirected | SLC40A1  |
| HSPA1A  | PFKFB3   | 0.05   | undirected | HSPA1B   |
| HSPA1A  | DNAJB1   | 0.38   | undirected | SOD2     |
| HSPA1A  | BNIP3L   | 0.07   | undirected | HLA-A    |
| HSPA1A  | HSPH1    | 0.08   | undirected | SEPP1    |
| HSPA1A  | GADD45B  | 0.11   | undirected | SDC3     |
| HSPA1A  | ADM      | 0.21   | undirected | NFKBIA   |
| HSPA1A  | IL2RA    | 0.05   | undirected | HSP90AA1 |
| HSPA1A  | CXCR4    | 0.06   | undirected | TMEM176A |
| HSPA1A  | DNAJA4   | 0.07   | undirected | TSC22D1  |
| HSPA1A  | EIF4A3   | 0.10   | undirected | TMEM176B |
| HSPA1A  | PLIN2    | 0.06   | undirected | CXCL9    |
| B2M     | HLA-A    | 0.11   | undirected | HSPB1    |
| B2M     | STAT1    | 0.07   | undirected | SLC1A3   |
| B2M     | ATOX1    | 0.06   | undirected | SMPDL3A  |
| B2M     | HLA-B    | 0.07   | undirected | STAT1    |
| B2M     | GBP1     | 0.05   | undirected | FOLR2    |
| B2M     | VAMP5    | 0.09   | undirected | CCL3     |
| B2M     | RARRES3  | 0.06   | undirected | SDCBP    |
| B2M     | HLA-E    | 0.06   | undirected | ATOX1    |
| B2M     | LILRB4   | 0.06   | undirected | SGK1     |
| B2M     | HLA-F    | 0.07   | undirected | MAFB     |
| B2M     | SLAMF7   | 0.05   | undirected | HLA-B    |
| B2M     | TNFSF13B | 0.06   | undirected | CXCL10   |
| SLC40A1 | CXCL12   | 0.05   | undirected | PDK4     |
| HSPA1B  | HSPB1    | 0.10   | undirected | HSPA5    |
| HSPA1B  | ARRDC3   | 0.09   | undirected | ATP1B3   |
| HSPA1B  | PFKFB3   | 0.06   | undirected | UBE2D1   |
| HSPA1B  | DNAJB1   | 0.42   | undirected | CREG1    |
| HSPA1B  | BNIP3L   | 0.06   | undirected | GBP1     |
| HSPA1B  | HSPH1    | 0.07   | undirected | TSPAN4   |
| HSPA1B  | GADD45B  | 0.12   | undirected | ARRDC3   |
| HSPA1B  | ADM      | 0.20   | undirected | PFKFB3   |
| HSPA1B  | DNAJA4   | 0.06   | undirected | VAMP5    |
| HSPA1B  | EIF4A3   | 0.08   | undirected | HERPUD1  |
| HSPA1B  | PLIN2    | 0.06   | undirected | RGL1     |
| SOD2    | CXCL9    | 0.16   | undirected | JUNB     |
| SOD2    | STAT1    | 0.14   | undirected | CD14     |
| SOD2    | CXCL10   | 0.10   | undirected | TYMP     |
| SOD2    | GBP1     | 0.16   | undirected | SNAP23   |
| SOD2    | VAMP5    | 0.05   | undirected | DNAJB1   |
| SOD2    | CCL13    | 0.07   | undirected | ARL4C    |
| SOD2    | ADAMDEC1 | 0.12   | undirected | BNIP3L   |

<https://jitc.bmj.com>

|    |       |          |      |            |
|----|-------|----------|------|------------|
| 1  |       |          |      |            |
| 2  | SOD2  | RARRES3  | 0.08 | undirected |
| 3  | SOD2  | TNFAIP3  | 0.06 | undirected |
| 4  | SOD2  | CD38     | 0.06 | undirected |
| 5  | SOD2  | CH25H    | 0.08 | undirected |
| 6  | SOD2  | GBP5     | 0.18 | undirected |
| 7  | SOD2  | GBP4     | 0.13 | undirected |
| 8  | SOD2  | SLAMF7   | 0.12 | undirected |
| 9  | SOD2  | CXCL11   | 0.07 | undirected |
| 10 |       |          |      |            |
| 11 | SOD2  | GCH1     | 0.09 | undirected |
| 12 | HLA-A | SDC3     | 0.10 | undirected |
| 13 | HLA-A | TMEM176A | 0.14 | undirected |
| 14 | HLA-A | TMEM176B | 0.11 | undirected |
| 15 | HLA-A | HSPB1    | 0.06 | undirected |
| 16 | HLA-A | STAT1    | 0.09 | undirected |
| 17 | HLA-A | ATOX1    | 0.15 | undirected |
| 18 | HLA-A | MAFB     | 0.06 | undirected |
| 19 | HLA-A | HLA-B    | 0.21 | undirected |
| 20 | HLA-A | TSPAN4   | 0.11 | undirected |
| 21 | HLA-A | VAMP5    | 0.18 | undirected |
| 22 | HLA-A | CD14     | 0.09 | undirected |
| 23 | HLA-A | TYMP     | 0.10 | undirected |
| 24 | HLA-A | MGAT1    | 0.12 | undirected |
| 25 | HLA-A | ZFAND5   | 0.06 | undirected |
| 26 | HLA-A | ICAM1    | 0.08 | undirected |
| 27 | HLA-A | CECR1    | 0.08 | undirected |
| 28 | HLA-A | RARRES3  | 0.09 | undirected |
| 29 | HLA-A | EPSTI1   | 0.06 | undirected |
| 30 | HLA-A | NR1H3    | 0.11 | undirected |
| 31 | HLA-A | HLA-E    | 0.18 | undirected |
| 32 | HLA-A | ACP2     | 0.14 | undirected |
| 33 | HLA-A | CD38     | 0.08 | undirected |
| 34 | HLA-A | TNFAIP2  | 0.07 | undirected |
| 35 | HLA-A | IL18BP   | 0.12 | undirected |
| 36 | HLA-A | HLA-DMB  | 0.07 | undirected |
| 37 | HLA-A | LILRB4   | 0.16 | undirected |
| 38 | HLA-A | CMKLR1   | 0.05 | undirected |
| 39 | HLA-A | ATF5     | 0.09 | undirected |
| 40 | HLA-A | CD4      | 0.09 | undirected |
| 41 | HLA-A | NINJ1    | 0.08 | undirected |
| 42 | HLA-A | MMP14    | 0.06 | undirected |
| 43 | HLA-A | HLA-F    | 0.19 | undirected |
| 44 | HLA-A | PIK3R1   | 0.09 | undirected |
| 45 | HLA-A | IL32     | 0.08 | undirected |
| 46 | HLA-A | SLAMF7   | 0.06 | undirected |
| 47 | HLA-A | TNFSF13B | 0.12 | undirected |
| 48 | HLA-A | RASSF4   | 0.12 | undirected |
| 49 | HLA-A | SLC16A10 | 0.05 | undirected |
| 50 | HLA-A | TFEC     | 0.05 | undirected |
| 51 | SEPP1 | FOLR2    | 0.08 | undirected |

|          |
|----------|
| IER3     |
| CCL13    |
| MGAT1    |
| FNIP2    |
| ELL2     |
| SDS      |
| HSPH1    |
| ZFAND5   |
| ICAM1    |
| NDFIP1   |
| GADD45B  |
| UGCG     |
| CECR1    |
| ADAMDEC1 |
| RARRES3  |
| EPSTI1   |
| KLF2     |
| ADM      |
| IL2RA    |
| NR1H3    |
| PTP4A1   |
| HLA-E    |
| ENPP2    |
| ACP2     |
| TNFAIP3  |
| CD38     |
| CXCR4    |
| TNFRSF14 |
| TNFAIP2  |
| DNAJA4   |
| IL18BP   |
| HIF1A    |
| HLA-DMB  |
| DMXL2    |
| LILRB4   |
| CMKLR1   |
| TGIF1    |
| ATF3     |
| FYB      |
| PNRC1    |
| ATF5     |
| CD4      |
| NINJ1    |
| CTSS     |
| CLK1     |
| CH25H    |
| MMP14    |
| ATP2A2   |
| CXCL12   |

|    |        |          |      |            |
|----|--------|----------|------|------------|
| 1  |        |          |      |            |
| 2  | SDC3   | NFKBIA   | 0.05 | undirected |
| 3  | SDC3   | TMEM176A | 0.12 | undirected |
| 4  | SDC3   | TMEM176B | 0.09 | undirected |
| 5  | SDC3   | CXCL9    | 0.06 | undirected |
| 6  | SDC3   | STAT1    | 0.17 | undirected |
| 7  | SDC3   | ATOX1    | 0.08 | undirected |
| 8  | SDC3   | MAFB     | 0.05 | undirected |
| 9  | SDC3   | HLA-B    | 0.06 | undirected |
| 10 | SDC3   | GBP1     | 0.10 | undirected |
| 11 | SDC3   | VAMP5    | 0.20 | undirected |
| 12 | SDC3   | CD14     | 0.06 | undirected |
| 13 | SDC3   | TYMP     | 0.11 | undirected |
| 14 | SDC3   | MGAT1    | 0.05 | undirected |
| 15 | SDC3   | ICAM1    | 0.10 | undirected |
| 16 | SDC3   | RARRES3  | 0.13 | undirected |
| 17 | SDC3   | EPSTI1   | 0.06 | undirected |
| 18 | SDC3   | NR1H3    | 0.12 | undirected |
| 19 | SDC3   | HLA-E    | 0.10 | undirected |
| 20 | SDC3   | ACP2     | 0.11 | undirected |
| 21 | SDC3   | CD38     | 0.11 | undirected |
| 22 | SDC3   | TNFAIP2  | 0.07 | undirected |
| 23 | SDC3   | IL18BP   | 0.09 | undirected |
| 24 | SDC3   | LILRB4   | 0.14 | undirected |
| 25 | SDC3   | CMKLR1   | 0.11 | undirected |
| 26 | SDC3   | ATF5     | 0.08 | undirected |
| 27 | SDC3   | CD4      | 0.05 | undirected |
| 28 | SDC3   | NINJ1    | 0.12 | undirected |
| 29 | SDC3   | MMP14    | 0.08 | undirected |
| 30 | SDC3   | CXCL12   | 0.06 | undirected |
| 31 | SDC3   | GBP5     | 0.08 | undirected |
| 32 | SDC3   | GBP4     | 0.07 | undirected |
| 33 | SDC3   | HLA-F    | 0.12 | undirected |
| 34 | SDC3   | IL32     | 0.12 | undirected |
| 35 | SDC3   | SLAMF7   | 0.11 | undirected |
| 36 | SDC3   | TNFSF13B | 0.14 | undirected |
| 37 | SDC3   | RASSF4   | 0.14 | undirected |
| 38 | NFKBIA | STAT1    | 0.05 | undirected |
| 39 | NFKBIA | PFKFB3   | 0.06 | undirected |
| 40 | NFKBIA | VAMP5    | 0.10 | undirected |
| 41 | NFKBIA | JUNB     | 0.07 | undirected |
| 42 | NFKBIA | TYMP     | 0.07 | undirected |
| 43 | NFKBIA | ICAM1    | 0.05 | undirected |
| 44 | NFKBIA | ACP2     | 0.06 | undirected |
| 45 | NFKBIA | LILRB4   | 0.11 | undirected |
| 46 | NFKBIA | PNRC1    | 0.09 | undirected |
| 47 | NFKBIA | NINJ1    | 0.10 | undirected |
| 48 | NFKBIA | HLA-F    | 0.07 | undirected |
| 49 | NFKBIA | TNFSF13B | 0.06 | undirected |
| 50 | NFKBIA | DUSP1    | 0.08 | undirected |

|            |
|------------|
| GBP5       |
| KCTD12     |
| GBP4       |
| GLA        |
| FMNL2      |
| CLEC4E     |
| HLA-F      |
| PIK3R1     |
| A2M        |
| LCP2       |
| DNAJB4     |
| FAM21A     |
| EIF4A3     |
| IL32       |
| MS4A6A     |
| SLAMF7     |
| NPL        |
| TNFSF13B   |
| HSD11B1    |
| CXCL11     |
| RASSF4     |
| IQGAP2     |
| SLC16A10   |
| RB1        |
| PAPSS2     |
| PLIN2      |
| TPP1       |
| GCH1       |
| TFEC       |
| HNRNPU     |
| ME1        |
| DUSP1      |
| HNRNPU-AS1 |

|    |          |            |      |            |
|----|----------|------------|------|------------|
| 1  |          |            |      |            |
| 2  | HSP90AA1 | SLC1A3     | 0.10 | undirected |
| 3  | HSP90AA1 | CCL3       | 0.05 | undirected |
| 4  | HSP90AA1 | SDCBP      | 0.08 | undirected |
| 5  | HSP90AA1 | ATOX1      | 0.06 | undirected |
| 6  | HSP90AA1 | SGK1       | 0.05 | undirected |
| 7  | HSP90AA1 | HSPA5      | 0.15 | undirected |
| 8  | HSP90AA1 | ATP1B3     | 0.14 | undirected |
| 9  | HSP90AA1 | CREG1      | 0.11 | undirected |
| 10 | HSP90AA1 | HERPUD1    | 0.06 | undirected |
| 11 | HSP90AA1 | RGL1       | 0.10 | undirected |
| 12 | HSP90AA1 | JUNB       | 0.10 | undirected |
| 13 | HSP90AA1 | MGAT1      | 0.05 | undirected |
| 14 | HSP90AA1 | ELL2       | 0.06 | undirected |
| 15 | HSP90AA1 | HSPH1      | 0.15 | undirected |
| 16 | HSP90AA1 | ZFAND5     | 0.12 | undirected |
| 17 | HSP90AA1 | NDFIP1     | 0.09 | undirected |
| 18 | HSP90AA1 | UGCG       | 0.11 | undirected |
| 19 | HSP90AA1 | PTP4A1     | 0.17 | undirected |
| 20 | HSP90AA1 | ENPP2      | 0.09 | undirected |
| 21 | HSP90AA1 | TNFRSF14   | 0.05 | undirected |
| 22 | HSP90AA1 | HIF1A      | 0.08 | undirected |
| 23 | HSP90AA1 | DMXL2      | 0.16 | undirected |
| 24 | HSP90AA1 | PNRC1      | 0.06 | undirected |
| 25 | HSP90AA1 | CTSS       | 0.05 | undirected |
| 26 | HSP90AA1 | CLK1       | 0.09 | undirected |
| 27 | HSP90AA1 | ATP2A2     | 0.13 | undirected |
| 28 | HSP90AA1 | FMNL2      | 0.07 | undirected |
| 29 | HSP90AA1 | DNAJB4     | 0.12 | undirected |
| 30 | HSP90AA1 | EIF4A3     | 0.07 | undirected |
| 31 | HSP90AA1 | MS4A6A     | 0.08 | undirected |
| 32 | HSP90AA1 | NPL        | 0.06 | undirected |
| 33 | HSP90AA1 | IQGAP2     | 0.14 | undirected |
| 34 | HSP90AA1 | SLC16A10   | 0.06 | undirected |
| 35 | HSP90AA1 | RB1        | 0.16 | undirected |
| 36 | HSP90AA1 | TPP1       | 0.10 | undirected |
| 37 | HSP90AA1 | TFEC       | 0.07 | undirected |
| 38 | HSP90AA1 | HNRNPU     | 0.11 | undirected |
| 39 | HSP90AA1 | ME1        | 0.09 | undirected |
| 40 | HSP90AA1 | HNRNPU-AS1 | 0.08 | undirected |
| 41 | TMEM176A | TMEM176B   | 0.26 | undirected |
| 42 | TMEM176A | STAT1      | 0.11 | undirected |
| 43 | TMEM176A | ATOX1      | 0.10 | undirected |
| 44 | TMEM176A | MAFB       | 0.05 | undirected |
| 45 | TMEM176A | HLA-B      | 0.12 | undirected |
| 46 | TMEM176A | GBP1       | 0.06 | undirected |
| 47 | TMEM176A | TSPAN4     | 0.07 | undirected |
| 48 | TMEM176A | VAMP5      | 0.18 | undirected |
| 49 | TMEM176A | CD14       | 0.08 | undirected |
| 50 | TMEM176A | TYMP       | 0.10 | undirected |
| 51 |          |            |      |            |
| 52 |          |            |      |            |
| 53 |          |            |      |            |
| 54 |          |            |      |            |
| 55 |          |            |      |            |
| 56 |          |            |      |            |
| 57 |          |            |      |            |
| 58 |          |            |      |            |
| 59 |          |            |      |            |
| 60 |          |            |      |            |

<https://jitc.bmj.com>



|    |          |          |      |            |
|----|----------|----------|------|------------|
| 1  |          |          |      |            |
| 2  | TMEM176A | MGAT1    | 0.07 | undirected |
| 3  | TMEM176A | ICAM1    | 0.12 | undirected |
| 4  | TMEM176A | CECR1    | 0.05 | undirected |
| 5  | TMEM176A | RARRES3  | 0.10 | undirected |
| 6  | TMEM176A | EPSTI1   | 0.06 | undirected |
| 7  | TMEM176A | NR1H3    | 0.11 | undirected |
| 8  | TMEM176A | HLA-E    | 0.13 | undirected |
| 9  | TMEM176A | ACP2     | 0.11 | undirected |
| 10 | TMEM176A | CD38     | 0.10 | undirected |
| 11 | TMEM176A | TNFAIP2  | 0.06 | undirected |
| 12 | TMEM176A | IL18BP   | 0.14 | undirected |
| 13 | TMEM176A | HLA-DMB  | 0.09 | undirected |
| 14 | TMEM176A | LILRB4   | 0.12 | undirected |
| 15 | TMEM176A | CMKLR1   | 0.10 | undirected |
| 16 | TMEM176A | ATF5     | 0.09 | undirected |
| 17 | TMEM176A | CD4      | 0.16 | undirected |
| 18 | TMEM176A | NINJ1    | 0.09 | undirected |
| 19 | TMEM176A | MMP14    | 0.08 | undirected |
| 20 | TMEM176A | HLA-F    | 0.14 | undirected |
| 21 | TMEM176A | PIK3R1   | 0.06 | undirected |
| 22 | TMEM176A | IL32     | 0.13 | undirected |
| 23 | TMEM176A | SLAMF7   | 0.08 | undirected |
| 24 | TMEM176A | TNFSF13B | 0.13 | undirected |
| 25 | TMEM176A | RASSF4   | 0.18 | undirected |
| 26 | TSC22D1  | ELL2     | 0.07 | undirected |
| 27 | TSC22D1  | CTSS     | 0.06 | undirected |
| 28 | TSC22D1  | GLA      | 0.06 | undirected |
| 29 | TMEM176B | STAT1    | 0.11 | undirected |
| 30 | TMEM176B | ATOX1    | 0.06 | undirected |
| 31 | TMEM176B | HLA-B    | 0.07 | undirected |
| 32 | TMEM176B | GBP1     | 0.07 | undirected |
| 33 | TMEM176B | VAMP5    | 0.14 | undirected |
| 34 | TMEM176B | CD14     | 0.05 | undirected |
| 35 | TMEM176B | TYMP     | 0.05 | undirected |
| 36 | TMEM176B | ICAM1    | 0.07 | undirected |
| 37 | TMEM176B | RARRES3  | 0.10 | undirected |
| 38 | TMEM176B | NR1H3    | 0.06 | undirected |
| 39 | TMEM176B | HLA-E    | 0.11 | undirected |
| 40 | TMEM176B | ACP2     | 0.07 | undirected |
| 41 | TMEM176B | CD38     | 0.06 | undirected |
| 42 | TMEM176B | IL18BP   | 0.08 | undirected |
| 43 | TMEM176B | HLA-DMB  | 0.08 | undirected |
| 44 | TMEM176B | LILRB4   | 0.07 | undirected |
| 45 | TMEM176B | CMKLR1   | 0.07 | undirected |
| 46 | TMEM176B | CD4      | 0.12 | undirected |
| 47 | TMEM176B | HLA-F    | 0.11 | undirected |
| 48 | TMEM176B | IL32     | 0.11 | undirected |
| 49 | TMEM176B | SLAMF7   | 0.08 | undirected |
| 50 | TMEM176B | TNFSF13B | 0.07 | undirected |
| 51 |          |          |      |            |
| 52 |          |          |      |            |
| 53 |          |          |      |            |
| 54 |          |          |      |            |
| 55 |          |          |      |            |
| 56 |          |          |      |            |
| 57 |          |          |      |            |
| 58 |          |          |      |            |
| 59 |          |          |      |            |
| 60 |          |          |      |            |



|    |          |          |      |            |
|----|----------|----------|------|------------|
| 1  |          |          |      |            |
| 2  | TMEM176B | RASSF4   | 0.14 | undirected |
| 3  | CXCL9    | SMPDL3A  | 0.09 | undirected |
| 4  | CXCL9    | STAT1    | 0.27 | undirected |
| 5  | CXCL9    | CXCL10   | 0.32 | undirected |
| 6  | CXCL9    | GBP1     | 0.29 | undirected |
| 7  | CXCL9    | VAMP5    | 0.07 | undirected |
| 8  | CXCL9    | CCL13    | 0.05 | undirected |
| 9  | CXCL9    | ICAM1    | 0.05 | undirected |
| 10 |          |          |      |            |
| 11 | CXCL9    | ADAMDEC1 | 0.25 | undirected |
| 12 | CXCL9    | RARRES3  | 0.17 | undirected |
| 13 | CXCL9    | NR1H3    | 0.06 | undirected |
| 14 | CXCL9    | TNFAIP3  | 0.10 | undirected |
| 15 | CXCL9    | CD38     | 0.15 | undirected |
| 16 | CXCL9    | CMKLR1   | 0.06 | undirected |
| 17 | CXCL9    | CXCL12   | 0.11 | undirected |
| 18 | CXCL9    | GBP5     | 0.26 | undirected |
| 19 | CXCL9    | GBP4     | 0.31 | undirected |
| 20 | CXCL9    | IL32     | 0.12 | undirected |
| 21 | CXCL9    | SLAMF7   | 0.22 | undirected |
| 22 | CXCL9    | HSD11B1  | 0.10 | undirected |
| 23 | CXCL9    | CXCL11   | 0.29 | undirected |
| 24 | CXCL9    | GCH1     | 0.27 | undirected |
| 25 | HSPB1    | DNAJB1   | 0.09 | undirected |
| 26 | HSPB1    | NR1H3    | 0.05 | undirected |
| 27 | HSPB1    | ACP2     | 0.06 | undirected |
| 28 | HSPB1    | IL18BP   | 0.05 | undirected |
| 29 | SLC1A3   | SDCBP    | 0.06 | undirected |
| 30 | SLC1A3   | ATOX1    | 0.05 | undirected |
| 31 | SLC1A3   | ATP1B3   | 0.12 | undirected |
| 32 | SLC1A3   | CREG1    | 0.07 | undirected |
| 33 | SLC1A3   | HERPUD1  | 0.09 | undirected |
| 34 | SLC1A3   | JUNB     | 0.09 | undirected |
| 35 | SLC1A3   | CD14     | 0.05 | undirected |
| 36 | SLC1A3   | MGAT1    | 0.06 | undirected |
| 37 | SLC1A3   | ZFAND5   | 0.08 | undirected |
| 38 | SLC1A3   | UGCG     | 0.07 | undirected |
| 39 | SLC1A3   | PTP4A1   | 0.11 | undirected |
| 40 | SLC1A3   | DMXL2    | 0.12 | undirected |
| 41 | SLC1A3   | PNRC1    | 0.08 | undirected |
| 42 | SLC1A3   | ATP2A2   | 0.07 | undirected |
| 43 | SLC1A3   | FMNL2    | 0.08 | undirected |
| 44 | SLC1A3   | A2M      | 0.11 | undirected |
| 45 | SLC1A3   | DNAJB4   | 0.06 | undirected |
| 46 | SLC1A3   | MS4A6A   | 0.10 | undirected |
| 47 | SLC1A3   | NPL      | 0.13 | undirected |
| 48 | SLC1A3   | IQGAP2   | 0.11 | undirected |
| 49 | SLC1A3   | RB1      | 0.06 | undirected |
| 50 | SLC1A3   | TPP1     | 0.09 | undirected |
| 51 | SLC1A3   | ME1      | 0.10 | undirected |
| 52 |          |          |      |            |
| 53 |          |          |      |            |
| 54 |          |          |      |            |
| 55 |          |          |      |            |
| 56 |          |          |      |            |
| 57 |          |          |      |            |
| 58 |          |          |      |            |
| 59 |          |          |      |            |
| 60 |          |          |      |            |

<https://jitc.bmj.com>

|    |         |          |      |            |
|----|---------|----------|------|------------|
| 1  |         |          |      |            |
| 2  | SMPDL3A | STAT1    | 0.05 | undirected |
| 3  | SMPDL3A | CXCL10   | 0.07 | undirected |
| 4  | SMPDL3A | GBP1     | 0.06 | undirected |
| 5  | SMPDL3A | HSD11B1  | 0.05 | undirected |
| 6  | SMPDL3A | CXCL11   | 0.10 | undirected |
| 7  | STAT1   | HLA-B    | 0.11 | undirected |
| 8  | STAT1   | CXCL10   | 0.27 | undirected |
| 9  | STAT1   | GBP1     | 0.32 | undirected |
| 10 | STAT1   | VAMP5    | 0.17 | undirected |
| 11 | STAT1   | TYMP     | 0.12 | undirected |
| 12 | STAT1   | SNAP23   | 0.05 | undirected |
| 13 | STAT1   | CCL13    | 0.05 | undirected |
| 14 | STAT1   | ICAM1    | 0.12 | undirected |
| 15 | STAT1   | ADAMDEC1 | 0.20 | undirected |
| 16 | STAT1   | RARRES3  | 0.28 | undirected |
| 17 | STAT1   | EPSTI1   | 0.10 | undirected |
| 18 | STAT1   | NR1H3    | 0.15 | undirected |
| 19 | STAT1   | HLA-E    | 0.06 | undirected |
| 20 | STAT1   | ACP2     | 0.09 | undirected |
| 21 | STAT1   | TNFAIP3  | 0.08 | undirected |
| 22 | STAT1   | CD38     | 0.24 | undirected |
| 23 | STAT1   | TNFAIP2  | 0.05 | undirected |
| 24 | STAT1   | IL18BP   | 0.09 | undirected |
| 25 | STAT1   | LILRB4   | 0.10 | undirected |
| 26 | STAT1   | CMKLR1   | 0.12 | undirected |
| 27 | STAT1   | ATF5     | 0.05 | undirected |
| 28 | STAT1   | NINJ1    | 0.11 | undirected |
| 29 | STAT1   | MMP14    | 0.08 | undirected |
| 30 | STAT1   | CXCL12   | 0.13 | undirected |
| 31 | STAT1   | GBP5     | 0.29 | undirected |
| 32 | STAT1   | GBP4     | 0.30 | undirected |
| 33 | STAT1   | HLA-F    | 0.11 | undirected |
| 34 | STAT1   | IL32     | 0.21 | undirected |
| 35 | STAT1   | SLAMF7   | 0.30 | undirected |
| 36 | STAT1   | TNFSF13B | 0.15 | undirected |
| 37 | STAT1   | HSD11B1  | 0.10 | undirected |
| 38 | STAT1   | CXCL11   | 0.22 | undirected |
| 39 | STAT1   | RASSF4   | 0.13 | undirected |
| 40 | STAT1   | GCH1     | 0.19 | undirected |
| 41 | FOLR2   | TSPAN4   | 0.09 | undirected |
| 42 | FOLR2   | CD14     | 0.07 | undirected |
| 43 | FOLR2   | CCL13    | 0.07 | undirected |
| 44 | FOLR2   | CLEC4E   | 0.09 | undirected |
| 45 | CCL3    | PDK4     | 0.10 | undirected |
| 46 | CCL3    | IER3     | 0.06 | undirected |
| 47 | CCL3    | PTP4A1   | 0.07 | undirected |
| 48 | CCL3    | HLA-E    | 0.07 | undirected |
| 49 | CCL3    | DMXL2    | 0.10 | undirected |
| 50 | CCL3    | CLK1     | 0.08 | undirected |
| 51 |         |          |      |            |
| 52 |         |          |      |            |
| 53 |         |          |      |            |
| 54 |         |          |      |            |
| 55 |         |          |      |            |
| 56 |         |          |      |            |
| 57 |         |          |      |            |
| 58 |         |          |      |            |
| 59 |         |          |      |            |
| 60 |         |          |      |            |

<https://jitc.bmj.com>

|    |       |          |                 |
|----|-------|----------|-----------------|
| 1  |       |          |                 |
| 2  | CCL3  | KCTD12   | 0.06 undirected |
| 3  | CCL3  | IQGAP2   | 0.09 undirected |
| 4  | CCL3  | SLC16A10 | 0.05 undirected |
| 5  | SDCBP | ATP1B3   | 0.16 undirected |
| 6  | SDCBP | UBE2D1   | 0.06 undirected |
| 7  | SDCBP | ZFAND5   | 0.06 undirected |
| 8  | SDCBP | NDFIP1   | 0.06 undirected |
| 9  | SDCBP | UGCG     | 0.06 undirected |
| 10 | SDCBP | PTP4A1   | 0.12 undirected |
| 11 | SDCBP | DMXL2    | 0.07 undirected |
| 12 | SDCBP | CTSS     | 0.10 undirected |
| 13 | SDCBP | NPL      | 0.07 undirected |
| 14 | SDCBP | IQGAP2   | 0.06 undirected |
| 15 | SDCBP | TPP1     | 0.07 undirected |
| 16 | SDCBP | ME1      | 0.05 undirected |
| 17 | ATOX1 | SGK1     | 0.08 undirected |
| 18 | ATOX1 | MAFB     | 0.15 undirected |
| 19 | ATOX1 | HLA-B    | 0.07 undirected |
| 20 | ATOX1 | ATP1B3   | 0.06 undirected |
| 21 | ATOX1 | CREG1    | 0.07 undirected |
| 22 | ATOX1 | TSPAN4   | 0.14 undirected |
| 23 | ATOX1 | VAMP5    | 0.14 undirected |
| 24 | ATOX1 | HERPUD1  | 0.07 undirected |
| 25 | ATOX1 | JUNB     | 0.07 undirected |
| 26 | ATOX1 | CD14     | 0.14 undirected |
| 27 | ATOX1 | TYMP     | 0.09 undirected |
| 28 | ATOX1 | MGAT1    | 0.21 undirected |
| 29 | ATOX1 | ZFAND5   | 0.10 undirected |
| 30 | ATOX1 | ICAM1    | 0.05 undirected |
| 31 | ATOX1 | RARRES3  | 0.05 undirected |
| 32 | ATOX1 | EPSTI1   | 0.05 undirected |
| 33 | ATOX1 | NR1H3    | 0.10 undirected |
| 34 | ATOX1 | PTP4A1   | 0.07 undirected |
| 35 | ATOX1 | HLA-E    | 0.16 undirected |
| 36 | ATOX1 | ENPP2    | 0.06 undirected |
| 37 | ATOX1 | ACP2     | 0.14 undirected |
| 38 | ATOX1 | CD38     | 0.05 undirected |
| 39 | ATOX1 | TNFRSF14 | 0.08 undirected |
| 40 | ATOX1 | TNFAIP2  | 0.07 undirected |
| 41 | ATOX1 | IL18BP   | 0.09 undirected |
| 42 | ATOX1 | HLA-DMB  | 0.06 undirected |
| 43 | ATOX1 | DMXL2    | 0.09 undirected |
| 44 | ATOX1 | LILRB4   | 0.15 undirected |
| 45 | ATOX1 | ATF3     | 0.06 undirected |
| 46 | ATOX1 | PNRC1    | 0.07 undirected |
| 47 | ATOX1 | ATF5     | 0.11 undirected |
| 48 | ATOX1 | CD4      | 0.06 undirected |
| 49 | ATOX1 | NINJ1    | 0.09 undirected |
| 50 | ATOX1 | CLK1     | 0.08 undirected |
| 51 |       |          |                 |
| 52 |       |          |                 |
| 53 |       |          |                 |
| 54 |       |          |                 |
| 55 |       |          |                 |
| 56 |       |          |                 |
| 57 |       |          |                 |
| 58 |       |          |                 |
| 59 |       |          |                 |
| 60 |       |          |                 |

<https://jitc.bmj.com>

|    |       |            |      |            |
|----|-------|------------|------|------------|
| 1  |       |            |      |            |
| 2  | ATOX1 | ATP2A2     | 0.10 | undirected |
| 3  | ATOX1 | HLA-F      | 0.15 | undirected |
| 4  | ATOX1 | PIK3R1     | 0.14 | undirected |
| 5  | ATOX1 | DNAJB4     | 0.06 | undirected |
| 6  | ATOX1 | MS4A6A     | 0.06 | undirected |
| 7  | ATOX1 | TNFSF13B   | 0.12 | undirected |
| 8  | ATOX1 | RASSF4     | 0.09 | undirected |
| 9  | ATOX1 | IQGAP2     | 0.10 | undirected |
| 10 | ATOX1 | SLC16A10   | 0.08 | undirected |
| 11 | ATOX1 | RB1        | 0.07 | undirected |
| 12 | ATOX1 | TFEC       | 0.14 | undirected |
| 13 | ATOX1 | HNRNPU     | 0.11 | undirected |
| 14 | ATOX1 | HNRNPU-AS1 | 0.09 | undirected |
| 15 | SGK1  | MAFB       | 0.05 | undirected |
| 16 | SGK1  | ATP1B3     | 0.05 | undirected |
| 17 | SGK1  | CREG1      | 0.09 | undirected |
| 18 | SGK1  | HERPUD1    | 0.07 | undirected |
| 19 | SGK1  | MGAT1      | 0.07 | undirected |
| 20 | SGK1  | PTP4A1     | 0.05 | undirected |
| 21 | SGK1  | DMXL2      | 0.06 | undirected |
| 22 | SGK1  | ATF3       | 0.16 | undirected |
| 23 | SGK1  | CLK1       | 0.08 | undirected |
| 24 | SGK1  | ATP2A2     | 0.10 | undirected |
| 25 | SGK1  | GLA        | 0.05 | undirected |
| 26 | SGK1  | PIK3R1     | 0.05 | undirected |
| 27 | SGK1  | IQGAP2     | 0.07 | undirected |
| 28 | SGK1  | TPP1       | 0.05 | undirected |
| 29 | SGK1  | TFEC       | 0.15 | undirected |
| 30 | MAFB  | CREG1      | 0.05 | undirected |
| 31 | MAFB  | VAMP5      | 0.11 | undirected |
| 32 | MAFB  | CD14       | 0.08 | undirected |
| 33 | MAFB  | MGAT1      | 0.15 | undirected |
| 34 | MAFB  | HLA-E      | 0.09 | undirected |
| 35 | MAFB  | ACP2       | 0.05 | undirected |
| 36 | MAFB  | DMXL2      | 0.05 | undirected |
| 37 | MAFB  | LILRB4     | 0.12 | undirected |
| 38 | MAFB  | ATP2A2     | 0.06 | undirected |
| 39 | MAFB  | HLA-F      | 0.08 | undirected |
| 40 | MAFB  | TNFSF13B   | 0.10 | undirected |
| 41 | MAFB  | IQGAP2     | 0.05 | undirected |
| 42 | MAFB  | TFEC       | 0.09 | undirected |
| 43 | HLA-B | GBP1       | 0.08 | undirected |
| 44 | HLA-B | VAMP5      | 0.13 | undirected |
| 45 | HLA-B | TYMP       | 0.06 | undirected |
| 46 | HLA-B | MGAT1      | 0.05 | undirected |
| 47 | HLA-B | ICAM1      | 0.05 | undirected |
| 48 | HLA-B | RARRES3    | 0.09 | undirected |
| 49 | HLA-B | NR1H3      | 0.06 | undirected |
| 50 | HLA-B | HLA-E      | 0.12 | undirected |
| 51 |       |            |      |            |
| 52 |       |            |      |            |
| 53 |       |            |      |            |
| 54 |       |            |      |            |
| 55 |       |            |      |            |
| 56 |       |            |      |            |
| 57 |       |            |      |            |
| 58 |       |            |      |            |
| 59 |       |            |      |            |
| 60 |       |            |      |            |

<https://jitc.bmj.com>

|    |        |          |      |            |
|----|--------|----------|------|------------|
| 1  |        |          |      |            |
| 2  | HLA-B  | ACP2     | 0.08 | undirected |
| 3  | HLA-B  | CD38     | 0.06 | undirected |
| 4  | HLA-B  | IL18BP   | 0.07 | undirected |
| 5  | HLA-B  | LILRB4   | 0.09 | undirected |
| 6  | HLA-B  | GBP5     | 0.05 | undirected |
| 7  | HLA-B  | HLA-F    | 0.13 | undirected |
| 8  | HLA-B  | IL32     | 0.07 | undirected |
| 9  | HLA-B  | SLAMF7   | 0.07 | undirected |
| 10 | HLA-B  | TNFSF13B | 0.07 | undirected |
| 11 | HLA-B  | RASSF4   | 0.06 | undirected |
| 12 | HLA-B  | RASSF4   | 0.06 | undirected |
| 13 | CXCL10 | GBP1     | 0.31 | undirected |
| 14 | CXCL10 | VAMP5    | 0.07 | undirected |
| 15 | CXCL10 | ADAMDEC1 | 0.16 | undirected |
| 16 | CXCL10 | ADAMDEC1 | 0.16 | undirected |
| 17 | CXCL10 | RARRES3  | 0.17 | undirected |
| 18 | CXCL10 | TNFAIP3  | 0.05 | undirected |
| 19 | CXCL10 | CD38     | 0.11 | undirected |
| 20 | CXCL10 | CD38     | 0.11 | undirected |
| 21 | CXCL10 | CXCL12   | 0.08 | undirected |
| 22 | CXCL10 | GBP5     | 0.24 | undirected |
| 23 | CXCL10 | GBP4     | 0.24 | undirected |
| 24 | CXCL10 | GBP4     | 0.24 | undirected |
| 25 | CXCL10 | IL32     | 0.10 | undirected |
| 26 | CXCL10 | IL32     | 0.10 | undirected |
| 27 | CXCL10 | SLAMF7   | 0.22 | undirected |
| 28 | CXCL10 | SLAMF7   | 0.22 | undirected |
| 29 | CXCL10 | HSD11B1  | 0.07 | undirected |
| 30 | CXCL10 | CXCL11   | 0.24 | undirected |
| 31 | CXCL10 | GCH1     | 0.24 | undirected |
| 32 | PDK4   | CD14     | 0.07 | undirected |
| 33 | PDK4   | CD14     | 0.07 | undirected |
| 34 | PDK4   | ZFAND5   | 0.05 | undirected |
| 35 | PDK4   | ZFAND5   | 0.05 | undirected |
| 36 | PDK4   | ICAM1    | 0.05 | undirected |
| 37 | PDK4   | HLA-E    | 0.05 | undirected |
| 38 | PDK4   | DMXL2    | 0.07 | undirected |
| 39 | PDK4   | DMXL2    | 0.07 | undirected |
| 40 | PDK4   | IQGAP2   | 0.05 | undirected |
| 41 | HSPA5  | ATP1B3   | 0.09 | undirected |
| 42 | HSPA5  | ATP1B3   | 0.09 | undirected |
| 43 | HSPA5  | CREG1    | 0.06 | undirected |
| 44 | HSPA5  | CREG1    | 0.06 | undirected |
| 45 | HSPA5  | JUNB     | 0.06 | undirected |
| 46 | HSPA5  | JUNB     | 0.06 | undirected |
| 47 | HSPA5  | HSPH1    | 0.07 | undirected |
| 48 | HSPA5  | HSPH1    | 0.07 | undirected |
| 49 | HSPA5  | ZFAND5   | 0.07 | undirected |
| 50 | HSPA5  | ZFAND5   | 0.07 | undirected |
| 51 | HSPA5  | UGCG     | 0.07 | undirected |
| 52 | HSPA5  | UGCG     | 0.07 | undirected |
| 53 | HSPA5  | PTP4A1   | 0.15 | undirected |
| 54 | HSPA5  | PTP4A1   | 0.15 | undirected |
| 55 | HSPA5  | HIF1A    | 0.06 | undirected |
| 56 | HSPA5  | HIF1A    | 0.06 | undirected |
| 57 | HSPA5  | DMXL2    | 0.11 | undirected |
| 58 | HSPA5  | DMXL2    | 0.11 | undirected |
| 59 | HSPA5  | CLK1     | 0.06 | undirected |
| 60 | HSPA5  | CLK1     | 0.06 | undirected |
|    | HSPA5  | ATP2A2   | 0.07 | undirected |
|    | HSPA5  | ATP2A2   | 0.07 | undirected |
|    | HSPA5  | IQGAP2   | 0.09 | undirected |
|    | HSPA5  | IQGAP2   | 0.09 | undirected |
|    | HSPA5  | RB1      | 0.09 | undirected |
|    | HSPA5  | RB1      | 0.09 | undirected |
|    | HSPA5  | HNRNPU   | 0.06 | undirected |
|    | HSPA5  | HNRNPU   | 0.06 | undirected |
|    | ATP1B3 | CREG1    | 0.08 | undirected |
|    | ATP1B3 | CREG1    | 0.08 | undirected |
|    | ATP1B3 | HERPUD1  | 0.06 | undirected |
|    | ATP1B3 | HERPUD1  | 0.06 | undirected |
|    | ATP1B3 | JUNB     | 0.10 | undirected |
|    | ATP1B3 | JUNB     | 0.10 | undirected |
|    | ATP1B3 | CD14     | 0.05 | undirected |
|    | ATP1B3 | CD14     | 0.05 | undirected |
|    | ATP1B3 | MGAT1    | 0.05 | undirected |
|    | ATP1B3 | MGAT1    | 0.05 | undirected |

|    |        |          |      |            |
|----|--------|----------|------|------------|
| 1  |        |          |      |            |
| 2  | ATP1B3 | ELL2     | 0.05 | undirected |
| 3  | ATP1B3 | HSPH1    | 0.06 | undirected |
| 4  | ATP1B3 | ZFAND5   | 0.11 | undirected |
| 5  | ATP1B3 | NDFIP1   | 0.13 | undirected |
| 6  | ATP1B3 | UGCG     | 0.11 | undirected |
| 7  | ATP1B3 | PTP4A1   | 0.17 | undirected |
| 8  | ATP1B3 | TNFRSF14 | 0.09 | undirected |
| 9  | ATP1B3 | DMXL2    | 0.12 | undirected |
| 10 | ATP1B3 | PNRC1    | 0.08 | undirected |
| 11 | ATP1B3 | CTSS     | 0.08 | undirected |
| 12 | ATP1B3 | ATP2A2   | 0.11 | undirected |
| 13 | ATP1B3 | DNAJB4   | 0.06 | undirected |
| 14 | ATP1B3 | FAM21A   | 0.06 | undirected |
| 15 | ATP1B3 | MS4A6A   | 0.09 | undirected |
| 16 | ATP1B3 | NPL      | 0.09 | undirected |
| 17 | ATP1B3 | IQGAP2   | 0.11 | undirected |
| 18 | ATP1B3 | RB1      | 0.10 | undirected |
| 19 | ATP1B3 | TPP1     | 0.13 | undirected |
| 20 | ATP1B3 | HNRNPU   | 0.09 | undirected |
| 21 | ATP1B3 | ME1      | 0.12 | undirected |
| 22 | CREG1  | HERPUD1  | 0.11 | undirected |
| 23 | CREG1  | RGL1     | 0.05 | undirected |
| 24 | CREG1  | JUNB     | 0.06 | undirected |
| 25 | CREG1  | MGAT1    | 0.06 | undirected |
| 26 | CREG1  | ELL2     | 0.05 | undirected |
| 27 | CREG1  | HSPH1    | 0.06 | undirected |
| 28 | CREG1  | ZFAND5   | 0.07 | undirected |
| 29 | CREG1  | PTP4A1   | 0.09 | undirected |
| 30 | CREG1  | ENPP2    | 0.07 | undirected |
| 31 | CREG1  | HIF1A    | 0.05 | undirected |
| 32 | CREG1  | DMXL2    | 0.11 | undirected |
| 33 | CREG1  | ATF3     | 0.09 | undirected |
| 34 | CREG1  | CLK1     | 0.09 | undirected |
| 35 | CREG1  | ATP2A2   | 0.11 | undirected |
| 36 | CREG1  | GLA      | 0.06 | undirected |
| 37 | CREG1  | CLEC4E   | 0.08 | undirected |
| 38 | CREG1  | PIK3R1   | 0.06 | undirected |
| 39 | CREG1  | DNAJB4   | 0.06 | undirected |
| 40 | CREG1  | MS4A6A   | 0.08 | undirected |
| 41 | CREG1  | NPL      | 0.05 | undirected |
| 42 | CREG1  | IQGAP2   | 0.12 | undirected |
| 43 | CREG1  | SLC16A10 | 0.08 | undirected |
| 44 | CREG1  | RB1      | 0.06 | undirected |
| 45 | CREG1  | PAPSS2   | 0.07 | undirected |
| 46 | CREG1  | TPP1     | 0.09 | undirected |
| 47 | CREG1  | TFEC     | 0.11 | undirected |
| 48 | CREG1  | HNRNPU   | 0.05 | undirected |
| 49 | GBP1   | VAMP5    | 0.12 | undirected |
| 50 | GBP1   | TYMP     | 0.07 | undirected |
| 51 |        |          |      |            |
| 52 |        |          |      |            |
| 53 |        |          |      |            |
| 54 |        |          |      |            |
| 55 |        |          |      |            |
| 56 |        |          |      |            |
| 57 |        |          |      |            |
| 58 |        |          |      |            |
| 59 |        |          |      |            |
| 60 |        |          |      |            |

<https://jitc.bmj.com>



|    |        |          |      |            |
|----|--------|----------|------|------------|
| 1  |        |          |      |            |
| 2  | GBP1   | CCL13    | 0.05 | undirected |
| 3  | GBP1   | ICAM1    | 0.08 | undirected |
| 4  | GBP1   | ADAMDEC1 | 0.21 | undirected |
| 5  | GBP1   | RARRES3  | 0.23 | undirected |
| 6  | GBP1   | EPSTI1   | 0.06 | undirected |
| 7  | GBP1   | NR1H3    | 0.09 | undirected |
| 8  | GBP1   | TNFAIP3  | 0.08 | undirected |
| 9  | GBP1   | CD38     | 0.18 | undirected |
| 10 | GBP1   | LILRB4   | 0.05 | undirected |
| 11 | GBP1   | CMKLR1   | 0.08 | undirected |
| 12 | GBP1   | NINJ1    | 0.06 | undirected |
| 13 | GBP1   | CXCL12   | 0.12 | undirected |
| 14 | GBP1   | GBP5     | 0.29 | undirected |
| 15 | GBP1   | GBP4     | 0.31 | undirected |
| 16 | GBP1   | HLA-F    | 0.06 | undirected |
| 17 | GBP1   | IL32     | 0.16 | undirected |
| 18 | GBP1   | SLAMF7   | 0.28 | undirected |
| 19 | GBP1   | TNFSF13B | 0.09 | undirected |
| 20 | GBP1   | HSD11B1  | 0.09 | undirected |
| 21 | GBP1   | CXCL11   | 0.25 | undirected |
| 22 | GBP1   | RASSF4   | 0.07 | undirected |
| 23 | GBP1   | GCH1     | 0.24 | undirected |
| 24 | TSPAN4 | VAMP5    | 0.07 | undirected |
| 25 | TSPAN4 | CD14     | 0.07 | undirected |
| 26 | TSPAN4 | MGAT1    | 0.11 | undirected |
| 27 | TSPAN4 | HLA-E    | 0.15 | undirected |
| 28 | TSPAN4 | ACP2     | 0.09 | undirected |
| 29 | TSPAN4 | HLA-DMB  | 0.07 | undirected |
| 30 | TSPAN4 | DMXL2    | 0.06 | undirected |
| 31 | TSPAN4 | LILRB4   | 0.08 | undirected |
| 32 | TSPAN4 | CLK1     | 0.06 | undirected |
| 33 | TSPAN4 | HLA-F    | 0.11 | undirected |
| 34 | TSPAN4 | PIK3R1   | 0.09 | undirected |
| 35 | TSPAN4 | IQGAP2   | 0.06 | undirected |
| 36 | TSPAN4 | SLC16A10 | 0.08 | undirected |
| 37 | TSPAN4 | TFEC     | 0.08 | undirected |
| 38 | TSPAN4 | HNRNPU   | 0.06 | undirected |
| 39 | ARRDC3 | DNAJB1   | 0.09 | undirected |
| 40 | ARRDC3 | BNIP3L   | 0.07 | undirected |
| 41 | ARRDC3 | ELL2     | 0.06 | undirected |
| 42 | ARRDC3 | ADM      | 0.10 | undirected |
| 43 | ARRDC3 | IL2RA    | 0.05 | undirected |
| 44 | ARRDC3 | CXCR4    | 0.08 | undirected |
| 45 | ARRDC3 | HIF1A    | 0.10 | undirected |
| 46 | ARRDC3 | CLK1     | 0.06 | undirected |
| 47 | ARRDC3 | SLC16A10 | 0.13 | undirected |
| 48 | ARRDC3 | PAPSS2   | 0.08 | undirected |
| 49 | PFKFB3 | DNAJB1   | 0.07 | undirected |
| 50 | PFKFB3 | ARL4C    | 0.07 | undirected |
| 51 |        |          |      |            |
| 52 |        |          |      |            |
| 53 |        |          |      |            |
| 54 |        |          |      |            |
| 55 |        |          |      |            |
| 56 |        |          |      |            |
| 57 |        |          |      |            |
| 58 |        |          |      |            |
| 59 |        |          |      |            |
| 60 |        |          |      |            |

<https://jitc.bmj.com>

|    |         |          |      |            |
|----|---------|----------|------|------------|
| 1  |         |          |      |            |
| 2  | PFKFB3  | SDS      | 0.08 | undirected |
| 3  | PFKFB3  | GADD45B  | 0.06 | undirected |
| 4  | PFKFB3  | TGIF1    | 0.06 | undirected |
| 5  | VAMP5   | CD14     | 0.11 | undirected |
| 6  | VAMP5   | TYMP     | 0.20 | undirected |
| 7  | VAMP5   | ARL4C    | 0.07 | undirected |
| 8  | VAMP5   | IER3     | 0.06 | undirected |
| 9  | VAMP5   | MGAT1    | 0.12 | undirected |
| 10 | VAMP5   | ZFAND5   | 0.08 | undirected |
| 11 | VAMP5   | ICAM1    | 0.15 | undirected |
| 12 | VAMP5   | RARRES3  | 0.19 | undirected |
| 13 | VAMP5   | EPSTI1   | 0.15 | undirected |
| 14 | VAMP5   | NR1H3    | 0.19 | undirected |
| 15 | VAMP5   | HLA-E    | 0.15 | undirected |
| 16 | VAMP5   | ACP2     | 0.19 | undirected |
| 17 | VAMP5   | CD38     | 0.18 | undirected |
| 18 | VAMP5   | TNFRSF14 | 0.06 | undirected |
| 19 | VAMP5   | TNFAIP2  | 0.09 | undirected |
| 20 | VAMP5   | IL18BP   | 0.16 | undirected |
| 21 | VAMP5   | LILRB4   | 0.22 | undirected |
| 22 | VAMP5   | CMKLR1   | 0.10 | undirected |
| 23 | VAMP5   | PNRC1    | 0.06 | undirected |
| 24 | VAMP5   | ATF5     | 0.14 | undirected |
| 25 | VAMP5   | CD4      | 0.08 | undirected |
| 26 | VAMP5   | NINJ1    | 0.19 | undirected |
| 27 | VAMP5   | MMP14    | 0.11 | undirected |
| 28 | VAMP5   | CXCL12   | 0.06 | undirected |
| 29 | VAMP5   | GBP5     | 0.11 | undirected |
| 30 | VAMP5   | GBP4     | 0.08 | undirected |
| 31 | VAMP5   | HLA-F    | 0.20 | undirected |
| 32 | VAMP5   | PIK3R1   | 0.08 | undirected |
| 33 | VAMP5   | IL32     | 0.18 | undirected |
| 34 | VAMP5   | SLAMF7   | 0.15 | undirected |
| 35 | VAMP5   | TNFSF13B | 0.26 | undirected |
| 36 | VAMP5   | HSD11B1  | 0.05 | undirected |
| 37 | VAMP5   | CXCL11   | 0.05 | undirected |
| 38 | VAMP5   | RASSF4   | 0.18 | undirected |
| 39 | HERPUD1 | CD14     | 0.05 | undirected |
| 40 | HERPUD1 | MGAT1    | 0.08 | undirected |
| 41 | HERPUD1 | ZFAND5   | 0.06 | undirected |
| 42 | HERPUD1 | PTP4A1   | 0.05 | undirected |
| 43 | HERPUD1 | DMXL2    | 0.06 | undirected |
| 44 | HERPUD1 | ATF3     | 0.06 | undirected |
| 45 | HERPUD1 | CLK1     | 0.06 | undirected |
| 46 | HERPUD1 | ATP2A2   | 0.07 | undirected |
| 47 | HERPUD1 | PIK3R1   | 0.05 | undirected |
| 48 | HERPUD1 | A2M      | 0.08 | undirected |
| 49 | HERPUD1 | MS4A6A   | 0.12 | undirected |
| 50 | HERPUD1 | IQGAP2   | 0.07 | undirected |
| 51 |         |          |      |            |
| 52 |         |          |      |            |
| 53 |         |          |      |            |
| 54 |         |          |      |            |
| 55 |         |          |      |            |
| 56 |         |          |      |            |
| 57 |         |          |      |            |
| 58 |         |          |      |            |
| 59 |         |          |      |            |
| 60 |         |          |      |            |



|    |         |            |      |            |
|----|---------|------------|------|------------|
| 1  |         |            |      |            |
| 2  | HERPUD1 | TFEC       | 0.09 | undirected |
| 3  | RGL1    | HSPH1      | 0.05 | undirected |
| 4  | RGL1    | IL2RA      | 0.05 | undirected |
| 5  | RGL1    | PTP4A1     | 0.06 | undirected |
| 6  | RGL1    | ENPP2      | 0.10 | undirected |
| 7  | RGL1    | DMXL2      | 0.08 | undirected |
| 8  | RGL1    | CLK1       | 0.07 | undirected |
| 9  | RGL1    | IQGAP2     | 0.08 | undirected |
| 10 |         |            |      |            |
| 11 | JUNB    | CD14       | 0.05 | undirected |
| 12 | JUNB    | MGAT1      | 0.07 | undirected |
| 13 | JUNB    | ZFAND5     | 0.07 | undirected |
| 14 | JUNB    | NDFIP1     | 0.12 | undirected |
| 15 | JUNB    | UGCG       | 0.05 | undirected |
| 16 | JUNB    | PTP4A1     | 0.11 | undirected |
| 17 | JUNB    | DMXL2      | 0.10 | undirected |
| 18 | JUNB    | LILRB4     | 0.06 | undirected |
| 19 | JUNB    | PNRC1      | 0.20 | undirected |
| 20 | JUNB    | ATP2A2     | 0.10 | undirected |
| 21 | JUNB    | FAM21A     | 0.05 | undirected |
| 22 | JUNB    | MS4A6A     | 0.06 | undirected |
| 23 | JUNB    | IQGAP2     | 0.09 | undirected |
| 24 | JUNB    | RB1        | 0.13 | undirected |
| 25 | JUNB    | TPP1       | 0.11 | undirected |
| 26 | JUNB    | DUSP1      | 0.12 | undirected |
| 27 | JUNB    | HNRNPU-AS1 | 0.05 | undirected |
| 28 |         |            |      |            |
| 29 | CD14    | TYMP       | 0.05 | undirected |
| 30 | CD14    | IER3       | 0.05 | undirected |
| 31 | CD14    | MGAT1      | 0.13 | undirected |
| 32 | CD14    | ZFAND5     | 0.08 | undirected |
| 33 | CD14    | ICAM1      | 0.06 | undirected |
| 34 | CD14    | PTP4A1     | 0.06 | undirected |
| 35 | CD14    | HLA-E      | 0.12 | undirected |
| 36 | CD14    | ACP2       | 0.07 | undirected |
| 37 | CD14    | IL18BP     | 0.07 | undirected |
| 38 | CD14    | DMXL2      | 0.10 | undirected |
| 39 | CD14    | LILRB4     | 0.11 | undirected |
| 40 | CD14    | ATF5       | 0.09 | undirected |
| 41 | CD14    | CD4        | 0.07 | undirected |
| 42 | CD14    | NINJ1      | 0.06 | undirected |
| 43 | CD14    | ATP2A2     | 0.06 | undirected |
| 44 | CD14    | HLA-F      | 0.09 | undirected |
| 45 | CD14    | PIK3R1     | 0.07 | undirected |
| 46 | CD14    | TNFSF13B   | 0.07 | undirected |
| 47 | CD14    | RASSF4     | 0.06 | undirected |
| 48 | CD14    | IQGAP2     | 0.09 | undirected |
| 49 | CD14    | SLC16A10   | 0.05 | undirected |
| 50 | CD14    | TFEC       | 0.08 | undirected |
| 51 | CD14    | HNRNPU     | 0.06 | undirected |
| 52 | CD14    | HNRNPU-AS1 | 0.06 | undirected |
| 53 |         |            |      |            |
| 54 |         |            |      |            |
| 55 |         |            |      |            |
| 56 |         |            |      |            |
| 57 |         |            |      |            |
| 58 |         |            |      |            |
| 59 |         |            |      |            |
| 60 |         |            |      |            |

<https://jitc.bmj.com>

|    |        |          |      |            |
|----|--------|----------|------|------------|
| 1  |        |          |      |            |
| 2  | TYMP   | IER3     | 0.06 | undirected |
| 3  | TYMP   | MGAT1    | 0.05 | undirected |
| 4  | TYMP   | ZFAND5   | 0.06 | undirected |
| 5  | TYMP   | ICAM1    | 0.09 | undirected |
| 6  | TYMP   | RARRES3  | 0.10 | undirected |
| 7  | TYMP   | NR1H3    | 0.12 | undirected |
| 8  | TYMP   | HLA-E    | 0.08 | undirected |
| 9  | TYMP   | ACP2     | 0.14 | undirected |
| 10 | TYMP   | CD38     | 0.09 | undirected |
| 11 | TYMP   | TNFRSF14 | 0.06 | undirected |
| 12 | TYMP   | TNFAIP2  | 0.05 | undirected |
| 13 | TYMP   | IL18BP   | 0.11 | undirected |
| 14 | TYMP   | LILRB4   | 0.15 | undirected |
| 15 | TYMP   | ATF5     | 0.09 | undirected |
| 16 | TYMP   | NINJ1    | 0.13 | undirected |
| 17 | TYMP   | MMP14    | 0.10 | undirected |
| 18 | TYMP   | GBP5     | 0.07 | undirected |
| 19 | TYMP   | HLA-F    | 0.11 | undirected |
| 20 | TYMP   | IL32     | 0.11 | undirected |
| 21 | TYMP   | SLAMF7   | 0.08 | undirected |
| 22 | TYMP   | TNFSF13B | 0.11 | undirected |
| 23 | TYMP   | RASSF4   | 0.08 | undirected |
| 24 | DNAJB1 | BNIP3L   | 0.08 | undirected |
| 25 | DNAJB1 | HSPH1    | 0.07 | undirected |
| 26 | DNAJB1 | GADD45B  | 0.14 | undirected |
| 27 | DNAJB1 | ADM      | 0.22 | undirected |
| 28 | DNAJB1 | IL2RA    | 0.05 | undirected |
| 29 | DNAJB1 | CXCR4    | 0.06 | undirected |
| 30 | DNAJB1 | DNAJA4   | 0.07 | undirected |
| 31 | DNAJB1 | EIF4A3   | 0.09 | undirected |
| 32 | DNAJB1 | PLIN2    | 0.07 | undirected |
| 33 | ARL4C  | SDS      | 0.06 | undirected |
| 34 | ARL4C  | LILRB4   | 0.07 | undirected |
| 35 | ARL4C  | NINJ1    | 0.10 | undirected |
| 36 | BNIP3L | ADM      | 0.14 | undirected |
| 37 | BNIP3L | CXCR4    | 0.06 | undirected |
| 38 | BNIP3L | SLC16A10 | 0.08 | undirected |
| 39 | BNIP3L | PLIN2    | 0.17 | undirected |
| 40 | IER3   | LILRB4   | 0.06 | undirected |
| 41 | IER3   | ATF5     | 0.09 | undirected |
| 42 | CCL13  | TNFAIP3  | 0.05 | undirected |
| 43 | CCL13  | GBP5     | 0.08 | undirected |
| 44 | CCL13  | CLEC4E   | 0.05 | undirected |
| 45 | MGAT1  | ZFAND5   | 0.09 | undirected |
| 46 | MGAT1  | NR1H3    | 0.06 | undirected |
| 47 | MGAT1  | PTP4A1   | 0.06 | undirected |
| 48 | MGAT1  | HLA-E    | 0.15 | undirected |
| 49 | MGAT1  | ENPP2    | 0.05 | undirected |
| 50 | MGAT1  | ACP2     | 0.09 | undirected |
| 51 |        |          |      |            |
| 52 |        |          |      |            |
| 53 |        |          |      |            |
| 54 |        |          |      |            |
| 55 |        |          |      |            |
| 56 |        |          |      |            |
| 57 |        |          |      |            |
| 58 |        |          |      |            |
| 59 |        |          |      |            |
| 60 |        |          |      |            |

<https://jitc.bmj.com>

|    |       |            |      |            |
|----|-------|------------|------|------------|
| 1  |       |            |      |            |
| 2  | MGAT1 | TNFRSF14   | 0.05 | undirected |
| 3  | MGAT1 | TNFAIP2    | 0.05 | undirected |
| 4  | MGAT1 | IL18BP     | 0.06 | undirected |
| 5  | MGAT1 | DMXL2      | 0.09 | undirected |
| 6  | MGAT1 | LILRB4     | 0.14 | undirected |
| 7  | MGAT1 | ATF3       | 0.05 | undirected |
| 8  | MGAT1 | PNRC1      | 0.07 | undirected |
| 9  | MGAT1 | ATF5       | 0.09 | undirected |
| 10 | MGAT1 | NINJ1      | 0.06 | undirected |
| 11 | MGAT1 | CLK1       | 0.06 | undirected |
| 12 | MGAT1 | ATP2A2     | 0.09 | undirected |
| 13 | MGAT1 | HLA-F      | 0.14 | undirected |
| 14 | MGAT1 | PIK3R1     | 0.10 | undirected |
| 15 | MGAT1 | DNAJB4     | 0.05 | undirected |
| 16 | MGAT1 | MS4A6A     | 0.08 | undirected |
| 17 | MGAT1 | TNFSF13B   | 0.09 | undirected |
| 18 | MGAT1 | RASSF4     | 0.06 | undirected |
| 19 | MGAT1 | IQGAP2     | 0.09 | undirected |
| 20 | MGAT1 | SLC16A10   | 0.06 | undirected |
| 21 | MGAT1 | RB1        | 0.07 | undirected |
| 22 | MGAT1 | TFEC       | 0.12 | undirected |
| 23 | MGAT1 | HNRNPU     | 0.08 | undirected |
| 24 | MGAT1 | HNRNPU-AS1 | 0.09 | undirected |
| 25 | FNIP2 | PTP4A1     | 0.05 | undirected |
| 26 | FNIP2 | HLA-E      | 0.07 | undirected |
| 27 | FNIP2 | HIF1A      | 0.07 | undirected |
| 28 | FNIP2 | DMXL2      | 0.11 | undirected |
| 29 | FNIP2 | CD4        | 0.06 | undirected |
| 30 | FNIP2 | CLK1       | 0.12 | undirected |
| 31 | FNIP2 | CLEC4E     | 0.06 | undirected |
| 32 | FNIP2 | PIK3R1     | 0.08 | undirected |
| 33 | FNIP2 | IQGAP2     | 0.09 | undirected |
| 34 | FNIP2 | SLC16A10   | 0.09 | undirected |
| 35 | FNIP2 | TFEC       | 0.06 | undirected |
| 36 | FNIP2 | HNRNPU     | 0.06 | undirected |
| 37 | ELL2  | HSPH1      | 0.06 | undirected |
| 38 | ELL2  | UGCG       | 0.05 | undirected |
| 39 | ELL2  | PTP4A1     | 0.08 | undirected |
| 40 | ELL2  | HIF1A      | 0.13 | undirected |
| 41 | ELL2  | DMXL2      | 0.11 | undirected |
| 42 | ELL2  | CTSS       | 0.07 | undirected |
| 43 | ELL2  | CLK1       | 0.09 | undirected |
| 44 | ELL2  | GLA        | 0.08 | undirected |
| 45 | ELL2  | IQGAP2     | 0.10 | undirected |
| 46 | ELL2  | SLC16A10   | 0.12 | undirected |
| 47 | ELL2  | PAPSS2     | 0.07 | undirected |
| 48 | SDS   | LILRB4     | 0.06 | undirected |
| 49 | SDS   | PNRC1      | 0.06 | undirected |
| 50 | HSPH1 | ZFAND5     | 0.05 | undirected |
| 51 |       |            |      |            |
| 52 |       |            |      |            |
| 53 |       |            |      |            |
| 54 |       |            |      |            |
| 55 |       |            |      |            |
| 56 |       |            |      |            |
| 57 |       |            |      |            |
| 58 |       |            |      |            |
| 59 |       |            |      |            |
| 60 |       |            |      |            |

|    |        |            |      |            |
|----|--------|------------|------|------------|
| 1  |        |            |      |            |
| 2  | HSPH1  | PTP4A1     | 0.10 | undirected |
| 3  | HSPH1  | DNAJA4     | 0.07 | undirected |
| 4  | HSPH1  | HIF1A      | 0.08 | undirected |
| 5  | HSPH1  | DMXL2      | 0.12 | undirected |
| 6  | HSPH1  | CLK1       | 0.09 | undirected |
| 7  | HSPH1  | ATP2A2     | 0.06 | undirected |
| 8  | HSPH1  | DNAJB4     | 0.06 | undirected |
| 9  | HSPH1  | EIF4A3     | 0.09 | undirected |
| 10 | HSPH1  | IQGAP2     | 0.11 | undirected |
| 11 | HSPH1  | SLC16A10   | 0.08 | undirected |
| 12 | HSPH1  | RB1        | 0.05 | undirected |
| 13 | HSPH1  | HNRNPU     | 0.06 | undirected |
| 14 | ZFAND5 | NDFIP1     | 0.06 | undirected |
| 15 | ZFAND5 | UGCG       | 0.07 | undirected |
| 16 | ZFAND5 | PTP4A1     | 0.13 | undirected |
| 17 | ZFAND5 | HLA-E      | 0.08 | undirected |
| 18 | ZFAND5 | ACP2       | 0.06 | undirected |
| 19 | ZFAND5 | TNFRSF14   | 0.05 | undirected |
| 20 | ZFAND5 | DMXL2      | 0.13 | undirected |
| 21 | ZFAND5 | LILRB4     | 0.07 | undirected |
| 22 | ZFAND5 | ATF5       | 0.06 | undirected |
| 23 | ZFAND5 | CLK1       | 0.06 | undirected |
| 24 | ZFAND5 | ATP2A2     | 0.09 | undirected |
| 25 | ZFAND5 | HLA-F      | 0.06 | undirected |
| 26 | ZFAND5 | PIK3R1     | 0.06 | undirected |
| 27 | ZFAND5 | DNAJB4     | 0.05 | undirected |
| 28 | ZFAND5 | MS4A6A     | 0.07 | undirected |
| 29 | ZFAND5 | IQGAP2     | 0.12 | undirected |
| 30 | ZFAND5 | SLC16A10   | 0.05 | undirected |
| 31 | ZFAND5 | RB1        | 0.09 | undirected |
| 32 | ZFAND5 | TPP1       | 0.07 | undirected |
| 33 | ZFAND5 | TFEC       | 0.06 | undirected |
| 34 | ZFAND5 | HNRNPU     | 0.08 | undirected |
| 35 | ZFAND5 | ME1        | 0.08 | undirected |
| 36 | ZFAND5 | HNRNPU-AS1 | 0.07 | undirected |
| 37 | ICAM1  | RARRES3    | 0.09 | undirected |
| 38 | ICAM1  | NR1H3      | 0.08 | undirected |
| 39 | ICAM1  | HLA-E      | 0.07 | undirected |
| 40 | ICAM1  | ACP2       | 0.09 | undirected |
| 41 | ICAM1  | CD38       | 0.07 | undirected |
| 42 | ICAM1  | IL18BP     | 0.10 | undirected |
| 43 | ICAM1  | LILRB4     | 0.10 | undirected |
| 44 | ICAM1  | ATF5       | 0.07 | undirected |
| 45 | ICAM1  | CD4        | 0.07 | undirected |
| 46 | ICAM1  | NINJ1      | 0.10 | undirected |
| 47 | ICAM1  | MMP14      | 0.10 | undirected |
| 48 | ICAM1  | GBP5       | 0.06 | undirected |
| 49 | ICAM1  | HLA-F      | 0.09 | undirected |
| 50 | ICAM1  | IL32       | 0.08 | undirected |
| 51 |        |            |      |            |
| 52 |        |            |      |            |
| 53 |        |            |      |            |
| 54 |        |            |      |            |
| 55 |        |            |      |            |
| 56 |        |            |      |            |
| 57 |        |            |      |            |
| 58 |        |            |      |            |
| 59 |        |            |      |            |
| 60 |        |            |      |            |

<https://jitc.bmj.com>

|    |          |          |      |            |
|----|----------|----------|------|------------|
| 1  |          |          |      |            |
| 2  | ICAM1    | SLAMF7   | 0.07 | undirected |
| 3  | ICAM1    | TNFSF13B | 0.08 | undirected |
| 4  | ICAM1    | RASSF4   | 0.07 | undirected |
| 5  | NDFIP1   | PTP4A1   | 0.12 | undirected |
| 6  | NDFIP1   | DMXL2    | 0.05 | undirected |
| 7  | NDFIP1   | PNRC1    | 0.09 | undirected |
| 8  | NDFIP1   | ATP2A2   | 0.08 | undirected |
| 9  | NDFIP1   | RB1      | 0.10 | undirected |
| 10 | NDFIP1   | TPP1     | 0.10 | undirected |
| 11 | GADD45B  | ADM      | 0.05 | undirected |
| 12 | UGCG     | PTP4A1   | 0.17 | undirected |
| 13 | UGCG     | HIF1A    | 0.09 | undirected |
| 14 | UGCG     | DMXL2    | 0.19 | undirected |
| 15 | UGCG     | CTSS     | 0.05 | undirected |
| 16 | UGCG     | CLK1     | 0.09 | undirected |
| 17 | UGCG     | ATP2A2   | 0.06 | undirected |
| 18 | UGCG     | DNAJB4   | 0.07 | undirected |
| 19 | UGCG     | NPL      | 0.08 | undirected |
| 20 | UGCG     | IQGAP2   | 0.14 | undirected |
| 21 | UGCG     | SLC16A10 | 0.06 | undirected |
| 22 | UGCG     | RB1      | 0.05 | undirected |
| 23 | UGCG     | HNRNPU   | 0.12 | undirected |
| 24 | UGCG     | ME1      | 0.08 | undirected |
| 25 | CECR1    | HLA-E    | 0.07 | undirected |
| 26 | CECR1    | HLA-F    | 0.05 | undirected |
| 27 | ADAMDEC1 | RARRES3  | 0.10 | undirected |
| 28 | ADAMDEC1 | TNFAIP3  | 0.08 | undirected |
| 29 | ADAMDEC1 | CD38     | 0.07 | undirected |
| 30 | ADAMDEC1 | CXCL12   | 0.05 | undirected |
| 31 | ADAMDEC1 | GBP5     | 0.22 | undirected |
| 32 | ADAMDEC1 | GBP4     | 0.21 | undirected |
| 33 | ADAMDEC1 | IL32     | 0.07 | undirected |
| 34 | ADAMDEC1 | SLAMF7   | 0.15 | undirected |
| 35 | ADAMDEC1 | CXCL11   | 0.12 | undirected |
| 36 | ADAMDEC1 | GCH1     | 0.12 | undirected |
| 37 | RARRES3  | EPSTI1   | 0.09 | undirected |
| 38 | RARRES3  | NR1H3    | 0.11 | undirected |
| 39 | RARRES3  | HLA-E    | 0.07 | undirected |
| 40 | RARRES3  | ACP2     | 0.08 | undirected |
| 41 | RARRES3  | CD38     | 0.19 | undirected |
| 42 | RARRES3  | IL18BP   | 0.08 | undirected |
| 43 | RARRES3  | LILRB4   | 0.10 | undirected |
| 44 | RARRES3  | CMKLR1   | 0.09 | undirected |
| 45 | RARRES3  | ATF5     | 0.05 | undirected |
| 46 | RARRES3  | NINJ1    | 0.08 | undirected |
| 47 | RARRES3  | MMP14    | 0.05 | undirected |
| 48 | RARRES3  | CXCL12   | 0.08 | undirected |
| 49 | RARRES3  | GBP5     | 0.18 | undirected |
| 50 | RARRES3  | GBP4     | 0.18 | undirected |
| 51 |          |          |      |            |
| 52 |          |          |      |            |
| 53 |          |          |      |            |
| 54 |          |          |      |            |
| 55 |          |          |      |            |
| 56 |          |          |      |            |
| 57 |          |          |      |            |
| 58 |          |          |      |            |
| 59 |          |          |      |            |
| 60 |          |          |      |            |

|    |         |          |      |            |
|----|---------|----------|------|------------|
| 1  |         |          |      |            |
| 2  | RARRES3 | HLA-F    | 0.11 | undirected |
| 3  | RARRES3 | IL32     | 0.18 | undirected |
| 4  | RARRES3 | SLAMF7   | 0.22 | undirected |
| 5  | RARRES3 | TNFSF13B | 0.12 | undirected |
| 6  | RARRES3 | HSD11B1  | 0.07 | undirected |
| 7  | RARRES3 | CXCL11   | 0.14 | undirected |
| 8  | RARRES3 | RASSF4   | 0.11 | undirected |
| 9  | RARRES3 | GCH1     | 0.11 | undirected |
| 10 |         |          |      |            |
| 11 | EPSTI1  | HLA-E    | 0.05 | undirected |
| 12 | EPSTI1  | CD38     | 0.09 | undirected |
| 13 | EPSTI1  | LILRB4   | 0.09 | undirected |
| 14 | EPSTI1  | HLA-F    | 0.07 | undirected |
| 15 | EPSTI1  | SLAMF7   | 0.06 | undirected |
| 16 | EPSTI1  | TNFSF13B | 0.14 | undirected |
| 17 | KLF2    | PNRC1    | 0.05 | undirected |
| 18 | KLF2    | DUSP1    | 0.07 | undirected |
| 19 | ADM     | CXCR4    | 0.08 | undirected |
| 20 | ADM     | PLIN2    | 0.17 | undirected |
| 21 | IL2RA   | ENPP2    | 0.10 | undirected |
| 22 | NR1H3   | HLA-E    | 0.10 | undirected |
| 23 | NR1H3   | ACP2     | 0.18 | undirected |
| 24 | NR1H3   | CD38     | 0.08 | undirected |
| 25 | NR1H3   | TNFAIP2  | 0.08 | undirected |
| 26 | NR1H3   | IL18BP   | 0.09 | undirected |
| 27 | NR1H3   | LILRB4   | 0.16 | undirected |
| 28 | NR1H3   | ATF5     | 0.07 | undirected |
| 29 | NR1H3   | NINJ1    | 0.11 | undirected |
| 30 | NR1H3   | MMP14    | 0.08 | undirected |
| 31 | NR1H3   | GBP5     | 0.07 | undirected |
| 32 | NR1H3   | GBP4     | 0.05 | undirected |
| 33 | NR1H3   | HLA-F    | 0.14 | undirected |
| 34 | NR1H3   | IL32     | 0.10 | undirected |
| 35 | NR1H3   | SLAMF7   | 0.10 | undirected |
| 36 | NR1H3   | TNFSF13B | 0.11 | undirected |
| 37 | NR1H3   | HSD11B1  | 0.06 | undirected |
| 38 | NR1H3   | RASSF4   | 0.09 | undirected |
| 39 | PTP4A1  | ENPP2    | 0.05 | undirected |
| 40 | PTP4A1  | TNFRSF14 | 0.09 | undirected |
| 41 | PTP4A1  | HIF1A    | 0.11 | undirected |
| 42 | PTP4A1  | DMXL2    | 0.17 | undirected |
| 43 | PTP4A1  | PNRC1    | 0.07 | undirected |
| 44 | PTP4A1  | CTSS     | 0.08 | undirected |
| 45 | PTP4A1  | CLK1     | 0.09 | undirected |
| 46 | PTP4A1  | ATP2A2   | 0.13 | undirected |
| 47 | PTP4A1  | FMNL2    | 0.06 | undirected |
| 48 | PTP4A1  | PIK3R1   | 0.06 | undirected |
| 49 | PTP4A1  | DNAJB4   | 0.11 | undirected |
| 50 | PTP4A1  | MS4A6A   | 0.08 | undirected |
| 51 | PTP4A1  | NPL      | 0.09 | undirected |
| 52 |         |          |      |            |
| 53 |         |          |      |            |
| 54 |         |          |      |            |
| 55 |         |          |      |            |
| 56 |         |          |      |            |
| 57 |         |          |      |            |
| 58 |         |          |      |            |
| 59 |         |          |      |            |
| 60 |         |          |      |            |



|    |        |            |      |            |
|----|--------|------------|------|------------|
| 1  |        |            |      |            |
| 2  | PTP4A1 | IQGAP2     | 0.14 | undirected |
| 3  | PTP4A1 | SLC16A10   | 0.07 | undirected |
| 4  | PTP4A1 | RB1        | 0.15 | undirected |
| 5  | PTP4A1 | TPP1       | 0.11 | undirected |
| 6  | PTP4A1 | TFEC       | 0.06 | undirected |
| 7  | PTP4A1 | HNRNPU     | 0.14 | undirected |
| 8  | PTP4A1 | ME1        | 0.13 | undirected |
| 9  | PTP4A1 | HNRNPU-AS1 | 0.08 | undirected |
| 10 |        |            |      |            |
| 11 | HLA-E  | ACP2       | 0.12 | undirected |
| 12 | HLA-E  | CD38       | 0.06 | undirected |
| 13 | HLA-E  | TNFRSF14   | 0.05 | undirected |
| 14 | HLA-E  | TNFAIP2    | 0.08 | undirected |
| 15 | HLA-E  | IL18BP     | 0.11 | undirected |
| 16 | HLA-E  | HIF1A      | 0.05 | undirected |
| 17 | HLA-E  | HLA-DMB    | 0.10 | undirected |
| 18 | HLA-E  | DMXL2      | 0.07 | undirected |
| 19 | HLA-E  | LILRB4     | 0.14 | undirected |
| 20 | HLA-E  | CMKLR1     | 0.05 | undirected |
| 21 | HLA-E  | ATF5       | 0.11 | undirected |
| 22 | HLA-E  | CD4        | 0.11 | undirected |
| 23 | HLA-E  | NINJ1      | 0.07 | undirected |
| 24 | HLA-E  | CLK1       | 0.08 | undirected |
| 25 | HLA-E  | ATP2A2     | 0.05 | undirected |
| 26 | HLA-E  | HLA-F      | 0.18 | undirected |
| 27 | HLA-E  | PIK3R1     | 0.12 | undirected |
| 28 | HLA-E  | DNAJB4     | 0.05 | undirected |
| 29 | HLA-E  | IL32       | 0.07 | undirected |
| 30 | HLA-E  | TNFSF13B   | 0.11 | undirected |
| 31 | HLA-E  | RASSF4     | 0.11 | undirected |
| 32 | HLA-E  | IQGAP2     | 0.07 | undirected |
| 33 | HLA-E  | SLC16A10   | 0.09 | undirected |
| 34 | HLA-E  | TFEC       | 0.09 | undirected |
| 35 | HLA-E  | HNRNPU     | 0.07 | undirected |
| 36 | HLA-E  | HNRNPU-AS1 | 0.05 | undirected |
| 37 | ENPP2  | DMXL2      | 0.06 | undirected |
| 38 | ENPP2  | CLK1       | 0.06 | undirected |
| 39 | ENPP2  | ATP2A2     | 0.09 | undirected |
| 40 | ENPP2  | MS4A6A     | 0.06 | undirected |
| 41 | ENPP2  | IQGAP2     | 0.07 | undirected |
| 42 | ENPP2  | RB1        | 0.05 | undirected |
| 43 | ENPP2  | TFEC       | 0.06 | undirected |
| 44 | ACP2   | CD38       | 0.08 | undirected |
| 45 | ACP2   | TNFRSF14   | 0.07 | undirected |
| 46 | ACP2   | TNFAIP2    | 0.07 | undirected |
| 47 | ACP2   | IL18BP     | 0.13 | undirected |
| 48 | ACP2   | LILRB4     | 0.17 | undirected |
| 49 | ACP2   | ATF5       | 0.11 | undirected |
| 50 | ACP2   | CD4        | 0.05 | undirected |
| 51 | ACP2   | NINJ1      | 0.13 | undirected |
| 52 |        |            |      |            |
| 53 |        |            |      |            |
| 54 |        |            |      |            |
| 55 |        |            |      |            |
| 56 |        |            |      |            |
| 57 |        |            |      |            |
| 58 |        |            |      |            |
| 59 |        |            |      |            |
| 60 |        |            |      |            |

|    |          |          |      |            |
|----|----------|----------|------|------------|
| 1  |          |          |      |            |
| 2  | ACP2     | MMP14    | 0.10 | undirected |
| 3  | ACP2     | HLA-F    | 0.15 | undirected |
| 4  | ACP2     | PIK3R1   | 0.07 | undirected |
| 5  | ACP2     | IL32     | 0.09 | undirected |
| 6  | ACP2     | SLAMF7   | 0.06 | undirected |
| 7  | ACP2     | TNFSF13B | 0.11 | undirected |
| 8  | ACP2     | RASSF4   | 0.09 | undirected |
| 9  | TNFAIP3  | ATF3     | 0.05 | undirected |
| 10 | TNFAIP3  | GBP5     | 0.13 | undirected |
| 11 | TNFAIP3  | GBP4     | 0.11 | undirected |
| 12 | TNFAIP3  | LCP2     | 0.07 | undirected |
| 13 | TNFAIP3  | SLAMF7   | 0.06 | undirected |
| 14 | CD38     | IL18BP   | 0.08 | undirected |
| 15 | CD38     | LILRB4   | 0.10 | undirected |
| 16 | CD38     | CMKLR1   | 0.08 | undirected |
| 17 | CD38     | NINJ1    | 0.07 | undirected |
| 18 | CD38     | CXCL12   | 0.07 | undirected |
| 19 | CD38     | GBP5     | 0.14 | undirected |
| 20 | CD38     | GBP4     | 0.12 | undirected |
| 21 | CD38     | HLA-F    | 0.10 | undirected |
| 22 | CD38     | IL32     | 0.13 | undirected |
| 23 | CD38     | SLAMF7   | 0.17 | undirected |
| 24 | CD38     | TNFSF13B | 0.11 | undirected |
| 25 | CD38     | HSD11B1  | 0.05 | undirected |
| 26 | CD38     | CXCL11   | 0.11 | undirected |
| 27 | CD38     | RASSF4   | 0.07 | undirected |
| 28 | CD38     | GCH1     | 0.07 | undirected |
| 29 | CXCR4    | HIF1A    | 0.07 | undirected |
| 30 | CXCR4    | CLK1     | 0.07 | undirected |
| 31 | CXCR4    | CLEC4E   | 0.07 | undirected |
| 32 | CXCR4    | SLC16A10 | 0.09 | undirected |
| 33 | CXCR4    | PLIN2    | 0.06 | undirected |
| 34 | TNFRSF14 | DMXL2    | 0.06 | undirected |
| 35 | TNFRSF14 | LILRB4   | 0.05 | undirected |
| 36 | TNFRSF14 | ATF5     | 0.06 | undirected |
| 37 | TNFRSF14 | IQGAP2   | 0.06 | undirected |
| 38 | TNFRSF14 | HNRNPU   | 0.05 | undirected |
| 39 | TNFAIP2  | LILRB4   | 0.11 | undirected |
| 40 | TNFAIP2  | HLA-F    | 0.11 | undirected |
| 41 | TNFAIP2  | TNFSF13B | 0.05 | undirected |
| 42 | TNFAIP2  | RASSF4   | 0.06 | undirected |
| 43 | DNAJA4   | CLK1     | 0.06 | undirected |
| 44 | IL18BP   | LILRB4   | 0.12 | undirected |
| 45 | IL18BP   | CMKLR1   | 0.05 | undirected |
| 46 | IL18BP   | ATF5     | 0.11 | undirected |
| 47 | IL18BP   | CD4      | 0.08 | undirected |
| 48 | IL18BP   | NINJ1    | 0.10 | undirected |
| 49 | IL18BP   | MMP14    | 0.08 | undirected |
| 50 | IL18BP   | HLA-F    | 0.12 | undirected |
| 51 |          |          |      |            |
| 52 |          |          |      |            |
| 53 |          |          |      |            |
| 54 |          |          |      |            |
| 55 |          |          |      |            |
| 56 |          |          |      |            |
| 57 |          |          |      |            |
| 58 |          |          |      |            |
| 59 |          |          |      |            |
| 60 |          |          |      |            |

<https://jitc.bmj.com>



|    |         |            |      |            |
|----|---------|------------|------|------------|
| 1  |         |            |      |            |
| 2  | IL18BP  | IL32       | 0.09 | undirected |
| 3  | IL18BP  | SLAMF7     | 0.06 | undirected |
| 4  | IL18BP  | TNFSF13B   | 0.08 | undirected |
| 5  | IL18BP  | RASSF4     | 0.07 | undirected |
| 6  | HIF1A   | DMXL2      | 0.14 | undirected |
| 7  | HIF1A   | CLK1       | 0.12 | undirected |
| 8  | HIF1A   | DNAJB4     | 0.05 | undirected |
| 9  | HIF1A   | IQGAP2     | 0.12 | undirected |
| 10 | HIF1A   | SLC16A10   | 0.14 | undirected |
| 11 | HIF1A   | PAPSS2     | 0.08 | undirected |
| 12 | HIF1A   | TFEC       | 0.05 | undirected |
| 13 | HIF1A   | HNRNPU     | 0.07 | undirected |
| 14 | HLA-DMB | CD4        | 0.06 | undirected |
| 15 | HLA-DMB | HLA-F      | 0.07 | undirected |
| 16 | HLA-DMB | PIK3R1     | 0.06 | undirected |
| 17 | HLA-DMB | SLC16A10   | 0.10 | undirected |
| 18 | DMXL2   | ATF3       | 0.07 | undirected |
| 19 | DMXL2   | PNRC1      | 0.05 | undirected |
| 20 | DMXL2   | CD4        | 0.07 | undirected |
| 21 | DMXL2   | CTSS       | 0.07 | undirected |
| 22 | DMXL2   | CLK1       | 0.15 | undirected |
| 23 | DMXL2   | ATP2A2     | 0.12 | undirected |
| 24 | DMXL2   | FMNL2      | 0.14 | undirected |
| 25 | DMXL2   | CLEC4E     | 0.06 | undirected |
| 26 | DMXL2   | PIK3R1     | 0.10 | undirected |
| 27 | DMXL2   | DNAJB4     | 0.14 | undirected |
| 28 | DMXL2   | MS4A6A     | 0.07 | undirected |
| 29 | DMXL2   | NPL        | 0.11 | undirected |
| 30 | DMXL2   | IQGAP2     | 0.19 | undirected |
| 31 | DMXL2   | SLC16A10   | 0.11 | undirected |
| 32 | DMXL2   | RB1        | 0.13 | undirected |
| 33 | DMXL2   | PAPSS2     | 0.07 | undirected |
| 34 | DMXL2   | TPP1       | 0.08 | undirected |
| 35 | DMXL2   | TFEC       | 0.11 | undirected |
| 36 | DMXL2   | HNRNPU     | 0.19 | undirected |
| 37 | DMXL2   | ME1        | 0.13 | undirected |
| 38 | DMXL2   | HNRNPU-AS1 | 0.15 | undirected |
| 39 | LILRB4  | PNRC1      | 0.08 | undirected |
| 40 | LILRB4  | ATF5       | 0.12 | undirected |
| 41 | LILRB4  | CD4        | 0.05 | undirected |
| 42 | LILRB4  | NINJ1      | 0.16 | undirected |
| 43 | LILRB4  | MMP14      | 0.08 | undirected |
| 44 | LILRB4  | HLA-F      | 0.19 | undirected |
| 45 | LILRB4  | PIK3R1     | 0.08 | undirected |
| 46 | LILRB4  | IL32       | 0.09 | undirected |
| 47 | LILRB4  | SLAMF7     | 0.07 | undirected |
| 48 | LILRB4  | TNFSF13B   | 0.18 | undirected |
| 49 | LILRB4  | RASSF4     | 0.12 | undirected |
| 50 | LILRB4  | TFEC       | 0.06 | undirected |
| 51 |         |            |      |            |
| 52 |         |            |      |            |
| 53 |         |            |      |            |
| 54 |         |            |      |            |
| 55 |         |            |      |            |
| 56 |         |            |      |            |
| 57 |         |            |      |            |
| 58 |         |            |      |            |
| 59 |         |            |      |            |
| 60 |         |            |      |            |

<https://jitc.bmj.com>

|    |        |          |      |            |
|----|--------|----------|------|------------|
| 1  |        |          |      |            |
| 2  | CMKLR1 | GBP5     | 0.06 | undirected |
| 3  | CMKLR1 | GBP4     | 0.05 | undirected |
| 4  | CMKLR1 | HLA-F    | 0.06 | undirected |
| 5  | CMKLR1 | IL32     | 0.12 | undirected |
| 6  | CMKLR1 | SLAMF7   | 0.10 | undirected |
| 7  | CMKLR1 | TNFSF13B | 0.05 | undirected |
| 8  | CMKLR1 | RASSF4   | 0.07 | undirected |
| 9  | ATF3   | CLK1     | 0.11 | undirected |
| 10 | ATF3   | ATP2A2   | 0.07 | undirected |
| 11 | ATF3   | CLEC4E   | 0.07 | undirected |
| 12 | ATF3   | EIF4A3   | 0.05 | undirected |
| 13 | ATF3   | IQGAP2   | 0.07 | undirected |
| 14 | ATF3   | SLC16A10 | 0.07 | undirected |
| 15 | ATF3   | TFEC     | 0.15 | undirected |
| 16 | FYB    | LCP2     | 0.06 | undirected |
| 17 | PNRC1  | NINJ1    | 0.05 | undirected |
| 18 | PNRC1  | ATP2A2   | 0.08 | undirected |
| 19 | PNRC1  | FAM21A   | 0.07 | undirected |
| 20 | PNRC1  | IQGAP2   | 0.05 | undirected |
| 21 | PNRC1  | RB1      | 0.07 | undirected |
| 22 | PNRC1  | TPP1     | 0.09 | undirected |
| 23 | PNRC1  | DUSP1    | 0.14 | undirected |
| 24 | ATF5   | NINJ1    | 0.09 | undirected |
| 25 | ATF5   | MMP14    | 0.06 | undirected |
| 26 | ATF5   | HLA-F    | 0.10 | undirected |
| 27 | ATF5   | IL32     | 0.06 | undirected |
| 28 | ATF5   | TNFSF13B | 0.07 | undirected |
| 29 | ATF5   | RASSF4   | 0.05 | undirected |
| 30 | CD4    | HLA-F    | 0.07 | undirected |
| 31 | CD4    | RASSF4   | 0.07 | undirected |
| 32 | CD4    | IQGAP2   | 0.06 | undirected |
| 33 | CD4    | SLC16A10 | 0.07 | undirected |
| 34 | NINJ1  | MMP14    | 0.09 | undirected |
| 35 | NINJ1  | GBP5     | 0.06 | undirected |
| 36 | NINJ1  | HLA-F    | 0.11 | undirected |
| 37 | NINJ1  | IL32     | 0.08 | undirected |
| 38 | NINJ1  | SLAMF7   | 0.07 | undirected |
| 39 | NINJ1  | TNFSF13B | 0.12 | undirected |
| 40 | NINJ1  | RASSF4   | 0.07 | undirected |
| 41 | CTSS   | NPL      | 0.08 | undirected |
| 42 | CTSS   | IQGAP2   | 0.06 | undirected |
| 43 | CLK1   | ATP2A2   | 0.07 | undirected |
| 44 | CLK1   | CLEC4E   | 0.08 | undirected |
| 45 | CLK1   | PIK3R1   | 0.09 | undirected |
| 46 | CLK1   | DNAJB4   | 0.12 | undirected |
| 47 | CLK1   | NPL      | 0.05 | undirected |
| 48 | CLK1   | IQGAP2   | 0.14 | undirected |
| 49 | CLK1   | SLC16A10 | 0.12 | undirected |
| 50 | CLK1   | PAPSS2   | 0.07 | undirected |
| 51 |        |          |      |            |
| 52 |        |          |      |            |
| 53 |        |          |      |            |
| 54 |        |          |      |            |
| 55 |        |          |      |            |
| 56 |        |          |      |            |
| 57 |        |          |      |            |
| 58 |        |          |      |            |
| 59 |        |          |      |            |
| 60 |        |          |      |            |

<https://jitc.bmj.com>

|    |        |            |      |            |
|----|--------|------------|------|------------|
| 1  |        |            |      |            |
| 2  | CLK1   | TFEC       | 0.10 | undirected |
| 3  | CLK1   | HNRNPU     | 0.11 | undirected |
| 4  | CLK1   | HNRNPU-AS1 | 0.06 | undirected |
| 5  | CH25H  | GBP5       | 0.06 | undirected |
| 6  | MMP14  | HLA-F      | 0.06 | undirected |
| 7  | MMP14  | IL32       | 0.06 | undirected |
| 8  | MMP14  | TNFSF13B   | 0.06 | undirected |
| 9  | MMP14  | RASSF4     | 0.05 | undirected |
| 10 |        |            |      |            |
| 11 | ATP2A2 | PIK3R1     | 0.06 | undirected |
| 12 | ATP2A2 | DNAJB4     | 0.06 | undirected |
| 13 | ATP2A2 | EIF4A3     | 0.05 | undirected |
| 14 | ATP2A2 | MS4A6A     | 0.08 | undirected |
| 15 | ATP2A2 | IQGAP2     | 0.13 | undirected |
| 16 | ATP2A2 | SLC16A10   | 0.05 | undirected |
| 17 | ATP2A2 | RB1        | 0.10 | undirected |
| 18 | ATP2A2 | TPP1       | 0.10 | undirected |
| 19 | ATP2A2 | TFEC       | 0.10 | undirected |
| 20 | ATP2A2 | HNRNPU     | 0.07 | undirected |
| 21 | ATP2A2 | ME1        | 0.05 | undirected |
| 22 | ATP2A2 | HNRNPU-AS1 | 0.07 | undirected |
| 23 | CXCL12 | GBP5       | 0.09 | undirected |
| 24 | CXCL12 | GBP4       | 0.09 | undirected |
| 25 | CXCL12 | IL32       | 0.05 | undirected |
| 26 | CXCL12 | SLAMF7     | 0.10 | undirected |
| 27 | CXCL12 | CXCL11     | 0.08 | undirected |
| 28 | GBP5   | GBP4       | 0.29 | undirected |
| 29 | GBP5   | LCP2       | 0.06 | undirected |
| 30 | GBP5   | IL32       | 0.14 | undirected |
| 31 | GBP5   | SLAMF7     | 0.23 | undirected |
| 32 | GBP5   | TNFSF13B   | 0.07 | undirected |
| 33 | GBP5   | HSD11B1    | 0.08 | undirected |
| 34 | GBP5   | CXCL11     | 0.18 | undirected |
| 35 | GBP5   | GCH1       | 0.19 | undirected |
| 36 | GBP4   | LCP2       | 0.07 | undirected |
| 37 | GBP4   | IL32       | 0.12 | undirected |
| 38 | GBP4   | SLAMF7     | 0.22 | undirected |
| 39 | GBP4   | HSD11B1    | 0.07 | undirected |
| 40 | GBP4   | CXCL11     | 0.20 | undirected |
| 41 | GBP4   | GCH1       | 0.20 | undirected |
| 42 | GLA    | SLC16A10   | 0.06 | undirected |
| 43 | GLA    | PAPSS2     | 0.05 | undirected |
| 44 | GLA    | TPP1       | 0.06 | undirected |
| 45 | FMNL2  | IQGAP2     | 0.11 | undirected |
| 46 | FMNL2  | HNRNPU     | 0.05 | undirected |
| 47 | FMNL2  | HNRNPU-AS1 | 0.05 | undirected |
| 48 | CLEC4E | IQGAP2     | 0.06 | undirected |
| 49 | CLEC4E | SLC16A10   | 0.08 | undirected |
| 50 | CLEC4E | TFEC       | 0.09 | undirected |
| 51 | HLA-F  | PIK3R1     | 0.10 | undirected |
| 52 |        |            |      |            |
| 53 |        |            |      |            |
| 54 |        |            |      |            |
| 55 |        |            |      |            |
| 56 |        |            |      |            |
| 57 |        |            |      |            |
| 58 |        |            |      |            |
| 59 |        |            |      |            |
| 60 |        |            |      |            |

<https://jitc.bmj.com>

|    |          |            |      |            |
|----|----------|------------|------|------------|
| 1  |          |            |      |            |
| 2  | HLA-F    | IL32       | 0.09 | undirected |
| 3  | HLA-F    | SLAMF7     | 0.07 | undirected |
| 4  | HLA-F    | TNFSF13B   | 0.14 | undirected |
| 5  | HLA-F    | RASSF4     | 0.13 | undirected |
| 6  | HLA-F    | SLC16A10   | 0.05 | undirected |
| 7  | HLA-F    | TFEC       | 0.06 | undirected |
| 8  | PIK3R1   | DNAJB4     | 0.06 | undirected |
| 9  | PIK3R1   | IQGAP2     | 0.12 | undirected |
| 10 | PIK3R1   | SLC16A10   | 0.10 | undirected |
| 11 | PIK3R1   | PAPSS2     | 0.05 | undirected |
| 12 | PIK3R1   | TFEC       | 0.10 | undirected |
| 13 | PIK3R1   | HNRNPU     | 0.07 | undirected |
| 14 | PIK3R1   | HNRNPU-AS1 | 0.05 | undirected |
| 15 | A2M      | MS4A6A     | 0.09 | undirected |
| 16 | DNAJB4   | IQGAP2     | 0.12 | undirected |
| 17 | DNAJB4   | SLC16A10   | 0.07 | undirected |
| 18 | DNAJB4   | TFEC       | 0.06 | undirected |
| 19 | DNAJB4   | HNRNPU     | 0.07 | undirected |
| 20 | FAM21A   | MS4A6A     | 0.09 | undirected |
| 21 | IL32     | SLAMF7     | 0.17 | undirected |
| 22 | IL32     | TNFSF13B   | 0.09 | undirected |
| 23 | IL32     | HSD11B1    | 0.06 | undirected |
| 24 | IL32     | CXCL11     | 0.07 | undirected |
| 25 | IL32     | RASSF4     | 0.10 | undirected |
| 26 | IL32     | GCH1       | 0.05 | undirected |
| 27 | MS4A6A   | IQGAP2     | 0.07 | undirected |
| 28 | MS4A6A   | RB1        | 0.05 | undirected |
| 29 | MS4A6A   | TPP1       | 0.06 | undirected |
| 30 | SLAMF7   | TNFSF13B   | 0.09 | undirected |
| 31 | SLAMF7   | HSD11B1    | 0.08 | undirected |
| 32 | SLAMF7   | CXCL11     | 0.16 | undirected |
| 33 | SLAMF7   | RASSF4     | 0.08 | undirected |
| 34 | SLAMF7   | GCH1       | 0.15 | undirected |
| 35 | NPL      | IQGAP2     | 0.10 | undirected |
| 36 | NPL      | TPP1       | 0.06 | undirected |
| 37 | NPL      | ME1        | 0.07 | undirected |
| 38 | TNFSF13B | RASSF4     | 0.10 | undirected |
| 39 | HSD11B1  | CXCL11     | 0.07 | undirected |
| 40 | CXCL11   | GCH1       | 0.21 | undirected |
| 41 | IQGAP2   | SLC16A10   | 0.11 | undirected |
| 42 | IQGAP2   | RB1        | 0.10 | undirected |
| 43 | IQGAP2   | PAPSS2     | 0.09 | undirected |
| 44 | IQGAP2   | TPP1       | 0.08 | undirected |
| 45 | IQGAP2   | TFEC       | 0.12 | undirected |
| 46 | IQGAP2   | HNRNPU     | 0.15 | undirected |
| 47 | IQGAP2   | ME1        | 0.11 | undirected |
| 48 | IQGAP2   | HNRNPU-AS1 | 0.11 | undirected |
| 49 | SLC16A10 | PAPSS2     | 0.17 | undirected |
| 50 | SLC16A10 | TFEC       | 0.09 | undirected |
| 51 |          |            |      |            |
| 52 |          |            |      |            |
| 53 |          |            |      |            |
| 54 |          |            |      |            |
| 55 |          |            |      |            |
| 56 |          |            |      |            |
| 57 |          |            |      |            |
| 58 |          |            |      |            |
| 59 |          |            |      |            |
| 60 |          |            |      |            |

<https://jitc.bmj.com>

1  
2  
3  
4  
5  
6  
7  
8  
9  
10  
11  
12  
13  
14  
15  
16  
17  
18  
19  
20  
21  
22  
23  
24  
25  
26  
27  
28  
29  
30  
31  
32  
33  
34  
35  
36  
37  
38  
39  
40  
41  
42  
43  
44  
45  
46  
47  
48  
49  
50  
51  
52  
53  
54  
55  
56  
57  
58  
59  
60

|          |            |      |            |
|----------|------------|------|------------|
| SLC16A10 | HNRNPU     | 0.08 | undirected |
| RB1      | TPP1       | 0.06 | undirected |
| RB1      | HNRNPU     | 0.06 | undirected |
| PAPSS2   | TFEC       | 0.06 | undirected |
| TFEC     | HNRNPU     | 0.07 | undirected |
| TFEC     | HNRNPU-AS1 | 0.07 | undirected |
| HNRNPU   | ME1        | 0.06 | undirected |
| HNRNPU   | HNRNPU-AS1 | 0.08 | undirected |

Confidential: For Review Only

1  
2  
3  
4  
5  
6  
7  
8  
9  
10  
11  
12  
13  
14  
15  
16  
17  
18  
19  
20  
21  
22  
23  
24  
25  
26  
27  
28  
29  
30  
31  
32  
33  
34  
35  
36  
37  
38  
39  
40  
41  
42  
43  
44  
45  
46  
47  
48  
49  
50  
51  
52  
53  
54  
55  
56  
57  
58  
59  
60**fied population analysis of NSCLC TAMs**

des

| Label    |
|----------|
| HSPA1A   |
| B2M      |
| SLC40A1  |
| HSPA1B   |
| SOD2     |
| HLA-A    |
| SEPP1    |
| SDC3     |
| NFKBIA   |
| HSP90AA1 |
| TMEM176A |
| TSC22D1  |
| TMEM176B |
| CXCL9    |
| HSPB1    |
| SLC1A3   |
| SMPDL3A  |
| STAT1    |
| FOLR2    |
| CCL3     |
| SDCBP    |
| ATOX1    |
| SGK1     |
| MAFB     |
| HLA-B    |
| CXCL10   |
| PDK4     |
| HSPA5    |
| ATP1B3   |
| UBE2D1   |
| CREG1    |
| GBP1     |
| TSPAN4   |
| ARRDC3   |
| PFKFB3   |
| VAMP5    |
| HERPUD1  |
| RGL1     |
| JUNB     |
| CD14     |
| TYMP     |
| SNAP23   |
| DNAJB1   |
| ARL4C    |
| BNIP3L   |

<https://jitc.bmj.com>

|    |          |
|----|----------|
| 1  | IER3     |
| 2  | CCL13    |
| 3  | MGAT1    |
| 4  | FNIP2    |
| 5  | ELL2     |
| 6  | SDS      |
| 7  | HSPH1    |
| 8  | ZFAND5   |
| 9  | ICAM1    |
| 10 | NDFIP1   |
| 11 | GADD45B  |
| 12 | UGCG     |
| 13 | CECR1    |
| 14 | ADAMDEC1 |
| 15 | RARRES3  |
| 16 | EPSTI1   |
| 17 | KLF2     |
| 18 | ADM      |
| 19 | IL2RA    |
| 20 | NR1H3    |
| 21 | PTP4A1   |
| 22 | HLA-E    |
| 23 | ENPP2    |
| 24 | ACP2     |
| 25 | TNFAIP3  |
| 26 | CD38     |
| 27 | CXCR4    |
| 28 | TNFRSF14 |
| 29 | TNFAIP2  |
| 30 | DNAJA4   |
| 31 | IL18BP   |
| 32 | HIF1A    |
| 33 | HLA-DMB  |
| 34 | DMXL2    |
| 35 | LILRB4   |
| 36 | CMKLR1   |
| 37 | TGIF1    |
| 38 | ATF3     |
| 39 | FYB      |
| 40 | PNRC1    |
| 41 | ATF5     |
| 42 | CD4      |
| 43 | NINJ1    |
| 44 | CTSS     |
| 45 | CLK1     |
| 46 | CH25H    |
| 47 | MMP14    |
| 48 | ATP2A2   |
| 49 | CXCL12   |

|    |            |
|----|------------|
| 1  |            |
| 2  | GBP5       |
| 3  | KCTD12     |
| 4  | GBP4       |
| 5  | GLA        |
| 6  |            |
| 7  | FMNL2      |
| 8  | CLEC4E     |
| 9  | HLA-F      |
| 10 | PIK3R1     |
| 11 | A2M        |
| 12 | LCP2       |
| 13 | DNAJB4     |
| 14 | FAM21A     |
| 15 | EIF4A3     |
| 16 |            |
| 17 | IL32       |
| 18 | MS4A6A     |
| 19 | SLAMF7     |
| 20 | NPL        |
| 21 | TNFSF13B   |
| 22 | HSD11B1    |
| 23 | CXCL11     |
| 24 | RASSF4     |
| 25 | IQGAP2     |
| 26 | SLC16A10   |
| 27 | RB1        |
| 28 | PAPSS2     |
| 29 | PLIN2      |
| 30 | TPP1       |
| 31 | GCH1       |
| 32 | TFEC       |
| 33 | HNRNPU     |
| 34 | ME1        |
| 35 | DUSP1      |
| 36 | HNRNPU-AS1 |
| 37 |            |
| 38 |            |
| 39 |            |
| 40 |            |
| 41 |            |
| 42 |            |
| 43 |            |
| 44 |            |
| 45 |            |
| 46 |            |
| 47 |            |
| 48 |            |
| 49 |            |
| 50 |            |
| 51 |            |
| 52 |            |
| 53 |            |
| 54 |            |
| 55 |            |
| 56 |            |
| 57 |            |
| 58 |            |
| 59 |            |
| 60 |            |



| Gene     | baseMean    | log2FoldChange | lfcMLE       | lfcSE       | stat         |
|----------|-------------|----------------|--------------|-------------|--------------|
| CXCL9    | 4512.43678  | 5.170507467    | 6.103390762  | 0.327520205 | 15.78683509  |
| CXCL10   | 190.1423226 | 3.727586265    | 4.267824379  | 0.303558173 | 12.27964387  |
| UBD      | 240.7025689 | 4.034269428    | 5.055830536  | 0.363603001 | 11.09525889  |
| GBP1     | 500.7827492 | 2.670932013    | 2.915565845  | 0.255221328 | 10.46515993  |
| FAM26F   | 116.383238  | 3.187019923    | 3.849342572  | 0.344093893 | 9.262064766  |
| SLAMF7   | 904.6340018 | 2.387629611    | 2.692383167  | 0.291424295 | 8.192966932  |
| TNFRSF9  | 45.96779735 | 2.261271899    | 2.520129674  | 0.27832711  | 8.124511825  |
| GBP4     | 356.5740555 | 2.40838949     | 2.746443017  | 0.302091422 | 7.972386227  |
| STAT1    | 1191.464254 | 1.84907342     | 1.98426701   | 0.232094175 | 7.966910054  |
| CXCL11   | 41.6841633  | 3.057087909    | 4.005585349  | 0.386137937 | 7.9170877    |
| IDO1     | 96.08202552 | 3.131046377    | 4.364571416  | 0.408261326 | 7.669221097  |
| PSTPIP2  | 185.9441512 | 1.816466287    | 1.958183846  | 0.238587276 | 7.613424811  |
| GCH1     | 73.23338882 | 2.447898457    | 2.897330027  | 0.332613684 | 7.359584326  |
| GBP5     | 721.3940221 | 2.447920405    | 2.915710628  | 0.337077873 | 7.262180639  |
| KCNJ10   | 49.33578881 | 2.915854168    | 4.224063797  | 0.419170342 | 6.95625114   |
| TAP1     | 523.6490667 | 1.526447841    | 1.625935752  | 0.220755291 | 6.914660267  |
| AIM2     | 46.86936296 | 2.609173918    | 3.391857251  | 0.385585116 | 6.766791063  |
| CP       | 15.11263423 | 2.883503815    | 4.522480022  | 0.43237743  | 6.668950822  |
| RARRES3  | 387.3089009 | 1.953402826    | 2.225281979  | 0.301321565 | 6.482784683  |
| IL32     | 97.89584969 | 2.260212137    | 2.751816486  | 0.350864503 | 6.441837575  |
| CD96     | 11.07934691 | 2.756758539    | 4.482989866  | 0.434591422 | 6.343333991  |
| APOL3    | 154.5613584 | 1.816569715    | 2.047288839  | 0.290900716 | 6.244638174  |
| ANKRD22  | 232.1423049 | 2.281670746    | 2.849107409  | 0.366338972 | 6.228304717  |
| ZBTB7C   | 14.6151735  | -2.510569835   | -3.826254317 | 0.426942271 | -5.880349658 |
| CD274    | 84.17610501 | 1.953247466    | 2.311220736  | 0.332787275 | 5.869357437  |
| IRF1     | 339.323677  | 1.662265963    | 1.862481201  | 0.285137577 | 5.82969801   |
| PPA1     | 143.4716337 | 1.616536447    | 1.797786214  | 0.27738706  | 5.827728393  |
| GBP2     | 357.9714831 | 1.624720684    | 1.812957835  | 0.281014805 | 5.781619533  |
| C19orf59 | 1553.906602 | -2.031442279   | -2.48463862  | 0.354940633 | -5.723329735 |
| TNNI2    | 38.70602634 | -1.682185783   | -1.92438981  | 0.302907975 | -5.553454924 |
| IL17RB   | 46.92695951 | -2.26312732    | -3.154301581 | 0.410267265 | -5.51622689  |
| DNM1     | 12.84992552 | -2.290348082   | -3.293524863 | 0.417286034 | -5.488676576 |
| SOD2     | 1544.752564 | 1.685174525    | 1.931119413  | 0.306984685 | 5.489441682  |
| GZMA     | 17.03863268 | 2.44929692     | 4.196864672  | 0.446924037 | 5.480342787  |
| HIC1     | 22.48479022 | 2.099456151    | 2.736309023  | 0.38402325  | 5.467002712  |
| SIGLEC10 | 480.8902563 | 1.828362011    | 2.169919851  | 0.334975915 | 5.458189469  |
| GRIN3A   | 19.93831121 | 2.042544305    | 2.60796801   | 0.377777318 | 5.40674151   |
| WARS     | 1054.205733 | 1.338911867    | 1.454213031  | 0.248928578 | 5.378698904  |
| MYOF     | 603.1487488 | 1.214423605    | 1.303389896  | 0.232438722 | 5.224704355  |
| AGRP     | 75.52732232 | -1.970343632   | -2.519032705 | 0.377698898 | -5.216704739 |
| FAM46C   | 11.83062945 | 2.308347775    | 3.886663865  | 0.445690114 | 5.179266275  |
| IL2RA    | 320.0182979 | 1.905708343    | 2.385019864  | 0.368207407 | 5.175638256  |
| BIRC7    | 75.86123373 | -2.115946613   | -2.936846511 | 0.41008673  | -5.159753916 |
| KLHDC7B  | 47.3769355  | 1.634031365    | 1.904762386  | 0.320952908 | 5.091187289  |
| LAP3     | 782.2716115 | 1.144086271    | 1.22308826   | 0.226532345 | 5.050432286  |

<https://jitc.bmj.com>

|            |             |              |              |             |              |
|------------|-------------|--------------|--------------|-------------|--------------|
| GZMB       | 28.60759796 | 2.313894752  | 5.386371668  | 0.460678276 | 5.022799798  |
| PDE4B      | 278.9907876 | 1.62727787   | 1.910619185  | 0.327092462 | 4.974978199  |
| TNFSF10    | 144.7946533 | 1.197403078  | 1.293000353  | 0.24086858  | 4.971188338  |
| CXCR2P1    | 78.15582347 | 2.041095635  | 2.836645634  | 0.411003767 | 4.966123907  |
| CD9        | 968.674048  | -1.743618331 | -2.120321571 | 0.351638153 | -4.95855844  |
| PDCD1LG2   | 124.0522743 | 1.700957946  | 2.049946524  | 0.346080943 | 4.91491363   |
| DUSP5      | 54.74381251 | 1.361792163  | 1.517728385  | 0.279583669 | 4.870785794  |
| HSPH1      | 281.4794656 | 1.637693911  | 1.945527486  | 0.336025977 | 4.873712222  |
| CCL5       | 246.2479485 | 1.893662012  | 2.478313099  | 0.38955793  | 4.861053693  |
| BAG3       | 194.9175561 | 1.519322049  | 1.752585387  | 0.31279148  | 4.857299978  |
| CD38       | 87.33807137 | 1.837932931  | 2.367994747  | 0.382389186 | 4.80644589   |
| CEACAM8    | 41.89050637 | -2.077501545 | -3.182856037 | 0.434641376 | -4.779806205 |
| CD3E       | 12.19496552 | 2.140425131  | 3.779927206  | 0.448703052 | 4.770248656  |
| PAQR5      | 18.44890216 | -1.739508511 | -2.182050371 | 0.365993134 | -4.752844658 |
| SNORD104   | 47.97400821 | -1.552318517 | -1.827524078 | 0.327550311 | -4.739175832 |
| ADAMDEC1   | 338.0778081 | 2.027009411  | 3.023331534  | 0.430250496 | 4.711230851  |
| CD52       | 411.8459839 | -1.698523791 | -2.101352577 | 0.361620792 | -4.696974923 |
| SIK1       | 223.5149145 | 1.453363748  | 1.67010195   | 0.3094927   | 4.695954863  |
| SLC39A8    | 49.30189053 | 1.667253858  | 2.041985416  | 0.35659855  | 4.675436444  |
| PLEK       | 997.4261377 | 1.043377175  | 1.113258112  | 0.223547969 | 4.667352503  |
| MMP25      | 59.3999198  | 1.85996473   | 2.524648297  | 0.402945816 | 4.615917714  |
| ENPP2      | 174.0567939 | 1.463515525  | 1.700067792  | 0.3190211   | 4.587519527  |
| MIR34A     | 52.27568979 | -1.828643847 | -2.46293461  | 0.399933269 | -4.572372417 |
| LY6E       | 2404.770296 | -1.402767944 | -1.616170439 | 0.311760643 | -4.499502983 |
| C1orf54    | 86.07037922 | 1.283798204  | 1.441665644  | 0.288097032 | 4.456131311  |
| CHDH       | 24.5476939  | -1.801738098 | -2.458350119 | 0.404394043 | -4.455402177 |
| HS3ST2     | 107.1838257 | -1.970981011 | -3.139185229 | 0.44187893  | -4.460454834 |
| TBL1X      | 124.6461316 | -1.161558021 | -1.273383737 | 0.26081208  | -4.453620478 |
| NRN1       | 43.99958441 | 1.881511185  | 2.72844844   | 0.423512858 | 4.442630609  |
| C17orf108  | 37.39068162 | -1.376967639 | -1.587753098 | 0.312574694 | -4.405243501 |
| MT1H       | 184.2869427 | 1.779044777  | 2.414060374  | 0.404093087 | 4.40256177   |
| CD8A       | 15.12770548 | 1.995208416  | 3.741558114  | 0.455014713 | 4.38493165   |
| ST6GALNAC6 | 77.82829391 | -1.301757689 | -1.478258946 | 0.297949737 | -4.369051314 |
| VAMP5      | 528.8158705 | 1.372778911  | 1.586096622  | 0.314150862 | 4.369807874  |
| ATP6VOD2   | 157.0498307 | -1.725975057 | -2.293121208 | 0.395715284 | -4.361658814 |
| CDC42SE2   | 125.5355136 | 1.197894456  | 1.328779582  | 0.27485791  | 4.358231704  |
| LRRK2      | 34.78095582 | 1.605114042  | 2.00526104   | 0.36779484  | 4.364155954  |
| MT2A       | 1209.71935  | 1.536958794  | 1.871175     | 0.352499819 | 4.360169029  |
| MAPRE3     | 24.91344589 | -1.286837298 | -1.459961368 | 0.295712188 | -4.351654588 |
| STAT4      | 16.62665086 | 1.88170985   | 2.892851765  | 0.435755081 | 4.318274028  |
| CXCL12     | 37.92469444 | 1.643980389  | 2.118244664  | 0.382030986 | 4.303264524  |
| KLF8       | 15.54149381 | -1.722778876 | -2.332100063 | 0.400660338 | -4.29984881  |
| GDF15      | 38.94252144 | -1.663552019 | -2.169859396 | 0.387574131 | -4.292216338 |
| HSD11B1    | 77.42781838 | 1.895123333  | 3.001402798  | 0.441716252 | 4.290363608  |
| CDC42BPA   | 13.6982526  | -1.647360004 | -2.136337223 | 0.385401302 | -4.274401761 |
| CYGB       | 31.04467308 | -1.964712183 | -4.015683942 | 0.459880306 | -4.27222509  |

<https://jitc.bmj.com>

|    |             |             |              |              |             |              |
|----|-------------|-------------|--------------|--------------|-------------|--------------|
| 1  |             |             |              |              |             |              |
| 2  | PLA2G2D     | 109.5312785 | 1.763716448  | 2.461637789  | 0.413350236 | 4.266881437  |
| 3  | GPA33       | 20.074732   | -1.797225017 | -2.592964504 | 0.422064886 | -4.258172329 |
| 4  | FAIM        | 12.17614835 | -1.610419491 | -2.064581715 | 0.37886071  | -4.25069016  |
| 5  | EMR3        | 35.63183757 | -1.714234096 | -2.342124521 | 0.405693736 | -4.22543891  |
| 6  | TMEM91      | 95.2425393  | -1.34607504  | -1.568863687 | 0.321264045 | -4.189933672 |
| 7  | BATF2       | 31.77379546 | 1.362084415  | 1.597428289  | 0.326218503 | 4.175374493  |
| 8  | NTRK3       | 10.85255794 | -1.916180613 | -4.357017511 | 0.460783586 | -4.158526195 |
| 9  | TLN2        | 36.65177328 | 1.497956833  | 1.852290677  | 0.36128621  | 4.146177718  |
| 10 | IL1B        | 365.4624561 | 1.530731403  | 1.919053129  | 0.369593579 | 4.141661248  |
| 11 | LRFN4       | 54.42784885 | -1.114733582 | -1.231747793 | 0.269706167 | -4.133140865 |
| 12 | IL21R       | 117.919771  | 1.569097085  | 2.01690221   | 0.382003964 | 4.107541372  |
| 13 | HAPLN3      | 104.8505968 | 1.544536053  | 1.966579232  | 0.377064127 | 4.096215846  |
| 14 | USP53       | 38.42799967 | -1.532371517 | -1.949601425 | 0.377029279 | -4.06433028  |
| 15 | CAPN3       | 91.897339   | -1.484926744 | -1.851003011 | 0.365542729 | -4.062252171 |
| 16 | EPHB3       | 16.04321053 | 1.713150509  | 2.505226601  | 0.425123443 | 4.029771909  |
| 17 | MT1G        | 229.2205578 | 1.598210025  | 2.128964957  | 0.397462612 | 4.021032365  |
| 18 | IL15RA      | 59.65779829 | 1.187577887  | 1.345951251  | 0.296237846 | 4.0088662    |
| 19 | FABP5       | 651.1523843 | -1.34778259  | -1.602750154 | 0.336712182 | -4.002773474 |
| 20 | HPCAL1      | 299.0343808 | -1.119391336 | -1.247699834 | 0.279630128 | -4.003114207 |
| 21 | DPEP2       | 159.1087223 | -1.28478646  | -1.497746601 | 0.321159137 | -4.000466783 |
| 22 | SPN         | 864.368385  | -1.040935645 | -1.141067125 | 0.26064361  | -3.993712512 |
| 23 | ME3         | 14.27058955 | -1.665542537 | -2.373729552 | 0.418253806 | -3.982133604 |
| 24 | SMCR7       | 20.82517801 | -1.493421207 | -1.908434374 | 0.375978283 | -3.972094331 |
| 25 | LFNG        | 137.6601483 | -1.270725548 | -1.479367116 | 0.320326492 | -3.966969886 |
| 26 | SDHAP1      | 11.0307236  | -1.352388557 | -1.630018644 | 0.341033727 | -3.965556627 |
| 27 | KCNQ1       | 68.43407129 | -1.084377198 | -1.202619957 | 0.274183171 | -3.954937113 |
| 28 | RETN        | 185.6122813 | -1.73801383  | -2.705437982 | 0.439412919 | -3.955308901 |
| 29 | ZBED3       | 14.76532506 | -1.659357388 | -2.39580425  | 0.419959478 | -3.951232142 |
| 30 | AGPAT4      | 120.7876177 | -1.04492469  | -1.14963983  | 0.264837777 | -3.945527342 |
| 31 | FRAT2       | 80.67946471 | -1.067034186 | -1.182101602 | 0.272627639 | -3.913888516 |
| 32 | MEGF6       | 13.56411613 | -1.40114029  | -1.740935712 | 0.359711719 | -3.895175539 |
| 33 | AOC3        | 17.32511481 | -1.707562265 | -2.764422382 | 0.441509835 | -3.867552049 |
| 34 | PRAM1       | 199.6594122 | -1.036969321 | -1.144111003 | 0.268405093 | -3.863448748 |
| 35 | MMP2        | 104.4945018 | -1.131589482 | -1.278722696 | 0.293487575 | -3.855664014 |
| 36 | NENF        | 185.2985659 | -1.202599637 | -1.386716423 | 0.312453562 | -3.848890796 |
| 37 | IGJ         | 25.03426785 | 1.71786273   | 2.842587141  | 0.447144592 | 3.841850621  |
| 38 | LYPD5       | 11.76862347 | 1.431623228  | 1.801045311  | 0.372756413 | 3.840640101  |
| 39 | TRAF1       | 39.07495406 | 1.179502759  | 1.353741848  | 0.307873172 | 3.831131994  |
| 40 | BAHCC1      | 11.08338558 | -1.424306698 | -1.813790257 | 0.372394177 | -3.824728702 |
| 41 | CSTB        | 5125.845831 | -1.096553251 | -1.229957929 | 0.286513486 | -3.82723085  |
| 42 | TNFAIP3     | 549.3857207 | 1.357195012  | 1.658290414  | 0.354818922 | 3.82503561   |
| 43 | B4GALT4     | 24.08728419 | -1.044208888 | -1.158562376 | 0.274408674 | -3.805305686 |
| 44 | EPB41L4A-AS | 107.2574279 | -1.036465322 | -1.149014178 | 0.272991289 | -3.79669742  |
| 45 | NLRP12      | 28.26961502 | -1.211329148 | -1.411054079 | 0.318789652 | -3.799775621 |
| 46 | RGS16       | 22.65632699 | 1.383606081  | 1.716949494  | 0.364476374 | 3.796147515  |
| 47 | DNAJB1      | 1690.007652 | 1.315862602  | 1.588047407  | 0.347011561 | 3.791984904  |

<https://jitc.bmj.com>

|    |           |             |              |              |             |              |
|----|-----------|-------------|--------------|--------------|-------------|--------------|
| 1  | KPNA2     | 104.7604481 | 1.071882838  | 1.198860744  | 0.284102682 | 3.772871234  |
| 2  | LOC284837 | 16.73846423 | -1.580344855 | -2.278049599 | 0.418927178 | -3.772361735 |
| 3  | ADTRP     | 26.90965128 | -1.625210188 | -2.483034162 | 0.434754915 | -3.73822154  |
| 4  | CFD       | 314.7313074 | -1.218506624 | -1.428252055 | 0.325922461 | -3.738639613 |
| 5  | TPD52     | 77.77927497 | 1.162417828  | 1.338019199  | 0.310828783 | 3.739736768  |
| 6  | TCEA3     | 13.18082252 | -1.652160472 | -2.638841273 | 0.442809935 | -3.731082661 |
| 7  | CFB       | 53.64032029 | 1.31677967   | 1.607309332  | 0.353567321 | 3.724268597  |
| 8  | SCMH1     | 41.56829122 | -1.260150241 | -1.503772579 | 0.338204441 | -3.726001459 |
| 9  | ACSS1     | 212.5864378 | -1.087601935 | -1.230498619 | 0.294850197 | -3.688659353 |
| 10 | PCOLCE2   | 116.0935723 | -1.482794737 | -2.007493868 | 0.403415967 | -3.675597546 |
| 11 | SPOCK2    | 36.43365789 | 1.579793894  | 2.353902999  | 0.42952817  | 3.677975049  |
| 12 | EPB41L1   | 76.72906749 | -1.428159977 | -1.869424133 | 0.389551634 | -3.666163484 |
| 13 | CYP27A1   | 634.0234076 | -1.30791622  | -1.603533052 | 0.3569423   | -3.664223093 |
| 14 | CHCHD6    | 61.28845067 | -1.553920909 | -2.265955139 | 0.425966879 | -3.647985289 |
| 15 | RBP7      | 12.33291279 | -1.533830689 | -2.207925016 | 0.421534111 | -3.638687001 |
| 16 | FXD6      | 122.0656734 | -1.141653001 | -1.318912896 | 0.314296896 | -3.632403041 |
| 17 | CORO2A    | 88.75755228 | -1.118281432 | -1.28625508  | 0.309464911 | -3.613596869 |
| 18 | SLC38A1   | 14.93963659 | 1.427307746  | 1.901610915  | 0.397634207 | 3.589499399  |
| 19 | ZNF267    | 53.92606871 | 1.15361397   | 1.343766349  | 0.321637805 | 3.586686491  |
| 20 | SLC9A9    | 24.61650662 | 1.094753715  | 1.251205052  | 0.30590015  | 3.578794305  |
| 21 | DNAJA4    | 54.96172049 | 1.346448282  | 1.714664564  | 0.377085903 | 3.570667247  |
| 22 | HIST1H2AG | 12.62391438 | 1.534625542  | 2.286465597  | 0.429959031 | 3.569236673  |
| 23 | ITIH5     | 18.01380904 | -1.56050212  | -2.430488669 | 0.437283954 | -3.568624247 |
| 24 | RGS1      | 1290.386358 | 1.213757973  | 1.450097489  | 0.340156181 | 3.568237297  |
| 25 | TCTN2     | 36.97239021 | -1.089437612 | -1.248258427 | 0.305691864 | -3.563842354 |
| 26 | PMFBP1    | 17.55474313 | -1.316757358 | -1.659715536 | 0.369912651 | -3.559644025 |
| 27 | FARP1     | 138.7932985 | -1.209209704 | -1.445885514 | 0.340426826 | -3.552040007 |
| 28 | PPAP2B    | 141.7971196 | -1.346442106 | -1.71891297  | 0.378979937 | -3.552805766 |
| 29 | TFCP2L1   | 31.78874217 | -1.294740835 | -1.614020272 | 0.364962417 | -3.547600451 |
| 30 | SVIL      | 75.06386479 | -1.182455914 | -1.399469772 | 0.333586426 | -3.544676347 |
| 31 | BCL11A    | 36.64326627 | -1.026677978 | -1.155217445 | 0.28983202  | -3.542320752 |
| 32 | SLC5A3    | 22.25607233 | 1.347137206  | 1.725796454  | 0.381362491 | 3.532432367  |
| 33 | HTRA1     | 66.06242209 | -1.412048326 | -1.892837754 | 0.400244311 | -3.527966014 |
| 34 | SLC30A1   | 30.56666234 | 1.325937924  | 1.686438193  | 0.376568622 | 3.521105712  |
| 35 | GIMAP8    | 107.1657938 | 1.001748586  | 1.122338434  | 0.284945563 | 3.515578815  |
| 36 | TRIM45    | 13.57986465 | -1.243580849 | -1.531240991 | 0.35448948  | -3.508089573 |
| 37 | CD72      | 86.94751182 | 1.043052331  | 1.182647951  | 0.297469493 | 3.506417824  |
| 38 | PGM5      | 12.59704999 | -1.54218198  | -2.438561388 | 0.441463372 | -3.493340732 |
| 39 | SIGLEC8   | 42.50725379 | 1.334351034  | 1.71537547   | 0.381816187 | 3.494747155  |
| 40 | AGPAT5    | 17.11981552 | 1.041876433  | 1.182593953  | 0.299409118 | 3.47977523   |
| 41 | IGFBP2    | 30.50841736 | -1.476491621 | -2.15509708  | 0.425588473 | -3.469294203 |
| 42 | SNX10     | 339.436605  | 1.294962281  | 1.634213353  | 0.373428261 | 3.467767212  |
| 43 | FABP4     | 96.0442691  | -1.52404285  | -2.380617348 | 0.440023273 | -3.46355055  |
| 44 | NLRP1     | 115.6950543 | -1.082403175 | -1.250673586 | 0.314068206 | -3.446395252 |
| 45 | FABP3     | 324.5236739 | -1.174692937 | -1.40572001  | 0.341303295 | -3.441786098 |
| 46 | HSPA6     | 40.88002351 | 1.288178687  | 1.629873972  | 0.375057829 | 3.434613513  |

<https://jitc.bmj.com>

1  
2  
3  
4  
5  
6  
7  
8  
9  
10  
11  
12  
13  
14  
15  
16  
17  
18  
19  
20  
21  
22  
23  
24  
25  
26  
27  
28  
29  
30  
31  
32  
33  
34  
35  
36  
37  
38  
39  
40  
41  
42  
43  
44  
45  
46  
47  
48  
49  
50  
51  
52  
53  
54  
55  
56  
57  
58  
59  
60

|          |             |              |              |             |              |
|----------|-------------|--------------|--------------|-------------|--------------|
| DTX4     | 52.56719135 | -1.450558876 | -2.093861592 | 0.422924002 | -3.429833419 |
| FAM73B   | 20.42321467 | -1.230126267 | -1.515470832 | 0.358459803 | -3.43169933  |
| JAKMIP2  | 34.04764597 | -1.408276105 | -1.948705502 | 0.410604977 | -3.429758977 |
| JAK2     | 28.59247861 | 1.134460025  | 1.339278036  | 0.331424872 | 3.422977938  |
| YPEL3    | 89.4986381  | -1.002338089 | -1.131866517 | 0.292666849 | -3.424843272 |
| TSC22D1  | 144.8975664 | 1.221076884  | 1.497533709  | 0.357080677 | 3.419610639  |
| RMI2     | 13.61250719 | 1.374464041  | 1.848886935  | 0.402772466 | 3.41250745   |
| SOX13    | 30.74870767 | -1.358773174 | -1.822580199 | 0.398301018 | -3.411422802 |
| FLJ41484 | 12.20979767 | -1.307896324 | -1.701371983 | 0.383734557 | -3.408336052 |
| KCNJ2    | 21.07829524 | 1.391193501  | 1.91442768   | 0.408319702 | 3.407118234  |
| CDA      | 30.69818753 | -1.248509857 | -1.556314221 | 0.367127667 | -3.400751206 |
| PI3      | 10.62057208 | 1.549756349  | 2.843644909  | 0.45697273  | 3.391354115  |
| LILRA2   | 73.98162077 | -1.055048756 | -1.215356963 | 0.31183313  | -3.38337609  |
| BIRC3    | 35.57862445 | 1.395495244  | 1.933844089  | 0.412630667 | 3.381947483  |
| CAMK2D   | 77.02188316 | 1.089227138  | 1.270164513  | 0.322241398 | 3.380158927  |
| ITPKB    | 61.44798586 | -1.048868815 | -1.207874502 | 0.310275952 | -3.380438636 |
| RNF144B  | 143.1558786 | 1.044012029  | 1.199489282  | 0.309569437 | 3.372464799  |
| TBC1D10C | 21.52038086 | -1.260794601 | -1.59737483  | 0.373971333 | -3.371366971 |
| PRDM1    | 176.5352971 | 1.031400809  | 1.181449561  | 0.306447697 | 3.365666695  |
| C2orf65  | 22.19151159 | -1.138025139 | -1.363142296 | 0.340587051 | -3.341363494 |
| CCL17    | 110.1324763 | -1.539850365 | -3.269285792 | 0.460828377 | -3.341483386 |
| RTN4R    | 27.27968072 | -1.499282949 | -2.494073946 | 0.448455408 | -3.34321523  |
| ATP13A2  | 156.3152114 | 1.099032875  | 1.295044546  | 0.329747653 | 3.332951322  |
| LILRA3   | 112.7163504 | 1.374592241  | 1.90802333   | 0.412497806 | 3.332362552  |
| AQP3     | 93.33761251 | -1.138097295 | -1.362434876 | 0.341867197 | -3.329062582 |
| ALK      | 13.07262688 | -1.458579898 | -2.284124122 | 0.440065333 | -3.314462166 |
| ST5      | 111.4008208 | -1.264873851 | -1.630377011 | 0.383662202 | -3.296842495 |
| MAZ      | 312.1177835 | -1.009698689 | -1.156931892 | 0.30687219  | -3.290290622 |
| CCL8     | 91.38932758 | 1.204827915  | 1.502548037  | 0.367099592 | 3.28201922   |
| C5orf20  | 18.85723214 | 1.380454234  | 1.982193557  | 0.422159922 | 3.269979363  |
| RPH3AL   | 15.51679569 | -1.18044595  | -1.459609736 | 0.361191643 | -3.268198397 |
| MT1E     | 143.6920815 | 1.275875463  | 1.67816484   | 0.392724255 | 3.248781933  |
| FNDC5    | 10.03290764 | -1.483089497 | -2.727978991 | 0.457166824 | -3.244088197 |
| FAM109A  | 25.92667614 | -1.221773486 | -1.558411076 | 0.377964007 | -3.232512787 |
| CLEC4D   | 11.17575785 | 1.405265307  | 2.135775731  | 0.435649371 | 3.225679639  |
| MXD1     | 644.8226231 | 1.112380195  | 1.339899727  | 0.345843137 | 3.216429866  |
| ROBO3    | 13.92355387 | -1.211520819 | -1.537446839 | 0.377090718 | -3.212809968 |
| MTRNR2L1 | 3112.626686 | 1.213544475  | 1.546476247  | 0.378327743 | 3.207653939  |
| SAMSN1   | 291.8312363 | 1.136243227  | 1.386598158  | 0.354215437 | 3.207774445  |



1  
2  
3  
4  
5  
6  
7  
8  
9  
10  
11  
12  
13  
14  
15  
16  
17  
18  
19  
20  
21  
22  
23  
24  
25  
26  
27  
28  
29  
30  
31  
32  
33  
34  
35  
36  
37  
38  
39  
40  
41  
42  
43  
44  
45  
46  
47  
48  
49  
50  
51  
52  
53  
54  
55  
56  
57  
58  
59  
60

| pvalue   | padj        | MeanDeseq_CXCL9_high | MeanDeseq_CXCL9_low |
|----------|-------------|----------------------|---------------------|
| 3.83E-56 | 5.03E-52    | 8931.253952          | 129.9474363         |
| 1.17E-34 | 7.64E-31    | 362.653433           | 18.87513211         |
| 1.32E-28 | 5.78E-25    | 469.0639106          | 14.27243298         |
| 1.25E-25 | 4.09E-22    | 887.086958           | 117.3602467         |
| 2.01E-20 | 5.26E-17    | 218.1285083          | 15.28487986         |
| 2.55E-16 | 5.57E-13    | 1572.883721          | 243.3785739         |
| 4.49E-16 | 8.42E-13    | 78.72209506          | 13.67591364         |
| 1.56E-15 | 2.37E-12    | 623.3214266          | 93.01157323         |
| 1.63E-15 | 2.37E-12    | 1910.566817          | 482.5146254         |
| 2.43E-15 | 3.19E-12    | 78.76455671          | 4.79327975          |
| 1.73E-14 | 2.06E-11    | 183.417647           | 8.956364075         |
| 2.67E-14 | 2.92E-11    | 296.6097972          | 76.55721744         |
| 1.84E-13 | 1.86E-10    | 129.3953405          | 17.26486854         |
| 3.81E-13 | 3.57E-10    | 1276.682507          | 170.0370891         |
| 3.49E-12 | 3.06E-09    | 93.97819487          | 4.945684436         |
| 4.69E-12 | 3.84E-09    | 794.2342996          | 257.2032584         |
| 1.32E-11 | 1.02E-08    | 86.2313745           | 7.973781225         |
| 2.58E-11 | 1.88E-08    | 29.05301136          | 1.197963918         |
| 9.00E-11 | 6.22E-08    | 641.1126445          | 136.6729022         |
| 1.18E-10 | 7.74E-08    | 171.0414439          | 25.49346005         |
| 2.25E-10 | 1.40E-07    | 21.13493106          | 1.079875634         |
| 4.25E-10 | 2.53E-07    | 250.1741804          | 60.34375268         |
| 4.72E-10 | 2.69E-07    | 408.3997937          | 57.18830988         |
| 4.09E-09 | 2.15E-06    | 2.164659735          | 27.20568014         |
| 4.37E-09 | 2.21E-06    | 140.2466297          | 28.28805057         |
| 5.55E-09 | 2.63E-06    | 533.6056298          | 147.186586          |
| 5.62E-09 | 2.63E-06    | 223.1041636          | 64.43696858         |
| 7.40E-09 | 3.35E-06    | 559.8334827          | 159.2777837         |
| 1.04E-08 | 4.57E-06    | 473.6987247          | 2637.305024         |
| 2.80E-08 | 1.18E-05    | 16.65635457          | 60.91643656         |
| 3.46E-08 | 1.42E-05    | 9.705280855          | 84.0346252          |
| 4.05E-08 | 1.56E-05    | 2.37134521           | 23.53526015         |
| 4.03E-08 | 1.56E-05    | 2452.173241          | 643.6401289         |
| 4.25E-08 | 1.59E-05    | 32.39768733          | 1.813304783         |
| 4.58E-08 | 1.67E-05    | 39.18497155          | 15.45696904         |
| 4.81E-08 | 1.71E-05    | 790.070783           | 176.1970815         |
| 6.42E-08 | 2.22E-05    | 34.43932016          | 5.61668341          |
| 7.50E-08 | 2.52E-05    | 1548.739024          | 565.5251216         |
| 1.74E-07 | 5.72E-05    | 861.5967427          | 349.7904694         |
| 1.82E-07 | 5.83E-05    | 23.01448799          | 128.0887811         |
| 2.23E-07 | 6.93E-05    | 22.15932748          | 1.522678996         |
| 2.27E-07 | 6.93E-05    | 539.3828977          | 103.4391181         |
| 2.47E-07 | 7.37E-05    | 17.83556102          | 133.842376          |
| 3.56E-07 | 0.00010145  | 75.21458257          | 20.00102635         |
| 4.41E-07 | 0.000123005 | 1098.490454          | 472.0867588         |

<https://jitc.bmj.com>

|    |          |             |             |             |
|----|----------|-------------|-------------|-------------|
| 1  |          |             |             |             |
| 2  | 5.09E-07 | 0.000139138 | 56.0742846  | 1.41388568  |
| 3  | 6.53E-07 | 0.000171122 | 441.0847306 | 118.1193525 |
| 4  | 6.65E-07 | 0.000171122 | 205.9755019 | 84.64054682 |
| 5  | 6.83E-07 | 0.000172271 | 137.6423802 | 19.33218546 |
| 6  | 7.10E-07 | 0.000175736 | 364.5785107 | 1571.702065 |
| 7  | 8.88E-07 | 0.000215721 | 200.4272978 | 48.28051918 |
| 8  | 1.11E-06 | 0.000255755 | 81.07839357 | 28.69986334 |
| 9  | 1.10E-06 | 0.000255755 | 448.3653085 | 116.3395745 |
| 10 | 1.17E-06 | 0.000264024 | 419.5517616 | 75.11301688 |
| 11 | 1.19E-06 | 0.000264517 | 301.5347805 | 89.8054913  |
| 12 | 1.54E-06 | 0.000335825 | 146.570295  | 28.51152268 |
| 13 | 1.75E-06 | 0.000377248 | 8.431428906 | 75.73844144 |
| 14 | 1.84E-06 | 0.000389216 | 22.53742458 | 1.942993904 |
| 15 | 2.01E-06 | 0.000417545 | 7.154944651 | 29.92229029 |
| 16 | 2.15E-06 | 0.00043974  | 21.56891439 | 74.79003518 |
| 17 | 2.46E-06 | 0.000496807 | 605.2063304 | 74.60585285 |
| 18 | 2.64E-06 | 0.00051944  | 157.6140814 | 666.6710615 |
| 19 | 2.65E-06 | 0.00051944  | 341.212712  | 107.5863369 |
| 20 | 2.93E-06 | 0.000565737 | 79.55438517 | 19.25533485 |
| 21 | 3.05E-06 | 0.000579922 | 1367.546097 | 633.9038677 |
| 22 | 3.91E-06 | 0.000722917 | 101.4506293 | 17.91629366 |
| 23 | 4.49E-06 | 0.000817034 | 267.5423658 | 82.3400184  |
| 24 | 4.82E-06 | 0.000866368 | 16.33662231 | 88.8977497  |
| 25 | 6.81E-06 | 0.001207156 | 1190.130734 | 3625.089967 |
| 26 | 8.35E-06 | 0.001401716 | 126.3231439 | 46.74310943 |
| 27 | 8.37E-06 | 0.001401716 | 7.713486096 | 41.40582259 |
| 28 | 8.18E-06 | 0.001401716 | 22.15008908 | 192.5431818 |
| 29 | 8.44E-06 | 0.001401716 | 73.08825596 | 177.4002464 |
| 30 | 8.89E-06 | 0.001438856 | 76.71924611 | 11.61659077 |
| 31 | 1.06E-05 | 0.001689998 | 18.51121445 | 56.5835373  |
| 32 | 1.07E-05 | 0.001690415 | 311.1260831 | 58.69650968 |
| 33 | 1.16E-05 | 0.001811466 | 27.94264646 | 2.425445129 |
| 34 | 1.25E-05 | 0.001903009 | 41.49817759 | 114.371628  |
| 35 | 1.24E-05 | 0.001903009 | 795.5673296 | 264.8290894 |
| 36 | 1.29E-05 | 0.001910674 | 54.0988692  | 260.02061   |
| 37 | 1.31E-05 | 0.001910674 | 179.7489578 | 71.9692963  |
| 38 | 1.28E-05 | 0.001910674 | 55.83149502 | 13.92882861 |
| 39 | 1.30E-05 | 0.001910674 | 1905.63352  | 521.849677  |
| 40 | 1.35E-05 | 0.001947275 | 13.66390629 | 36.32354584 |
| 41 | 1.57E-05 | 0.002241726 | 29.35115683 | 3.989981084 |
| 42 | 1.68E-05 | 0.002373388 | 61.85174854 | 14.27897391 |
| 43 | 1.71E-05 | 0.002384623 | 5.232447646 | 26.04430978 |
| 44 | 1.77E-05 | 0.002436942 | 14.35202272 | 63.55345446 |
| 45 | 1.78E-05 | 0.002436942 | 138.1289149 | 17.28685068 |
| 46 | 1.92E-05 | 0.002589973 | 5.073712166 | 22.39830902 |
| 47 | 1.94E-05 | 0.002589973 | 3.702262088 | 58.37593472 |

<https://jitc.bmj.com>

1  
2  
3  
4  
5  
6  
7  
8  
9  
10  
11  
12  
13  
14  
15  
16  
17  
18  
19  
20  
21  
22  
23  
24  
25  
26  
27  
28  
29  
30  
31  
32  
33  
34  
35  
36  
37  
38  
39  
40  
41  
42  
43  
44  
45  
46  
47  
48  
49  
50  
51  
52  
53  
54  
55  
56  
57  
58  
59  
60

|             |             |             |             |
|-------------|-------------|-------------|-------------|
| 1.98E-05    | 0.002625973 | 187.1868766 | 33.75703547 |
| 2.06E-05    | 0.002676305 | 5.730280819 | 34.51225258 |
| 2.13E-05    | 0.002713567 | 4.682607852 | 19.81605945 |
| 2.38E-05    | 0.002978673 | 11.83423157 | 59.74160009 |
| 2.79E-05    | 0.003420147 | 48.14503969 | 142.5606043 |
| 2.97E-05    | 0.003612651 | 47.90118691 | 15.80469036 |
| 3.20E-05    | 0.003818939 | 1.123732583 | 20.50737678 |
| 3.38E-05    | 0.003994421 | 57.72186331 | 15.92327108 |
| 3.45E-05    | 0.004037539 | 579.2322509 | 153.6649518 |
| 3.58E-05    | 0.004116721 | 32.73840297 | 76.34639128 |
| 4.00E-05    | 0.004521206 | 189.9715865 | 47.22601005 |
| 4.20E-05    | 0.004707482 | 167.3483093 | 43.1335003  |
| 4.82E-05    | 0.005353874 | 15.67126699 | 61.77172246 |
| 4.86E-05    | 0.005356379 | 40.55261462 | 143.8609419 |
| 5.58E-05    | 0.006001833 | 27.42636359 | 4.851117394 |
| 5.79E-05    | 0.006128475 | 374.16049   | 85.88002774 |
| 6.10E-05    | 0.006401271 | 86.28139903 | 33.57960081 |
| 6.26E-05    | 0.006464997 | 324.3770739 | 977.5728946 |
| 6.25E-05    | 0.006464997 | 178.5542572 | 421.3580102 |
| 6.32E-05    | 0.006477341 | 84.11032787 | 234.5295164 |
| 6.50E-05    | 0.006613084 | 542.6797495 | 1193.444903 |
| 6.83E-05    | 0.006890355 | 4.691142907 | 23.90014536 |
| 7.12E-05    | 0.007078473 | 9.138286735 | 32.55599116 |
| 7.28E-05    | 0.007166747 | 73.0229619  | 203.1865367 |
| 7.32E-05    | 0.007166747 | 5.816513472 | 16.31065712 |
| 7.66E-05    | 0.007266625 | 41.51847657 | 95.67093787 |
| 7.64E-05    | 0.007266625 | 49.44628869 | 322.4800456 |
| 7.77E-05    | 0.007283496 | 4.970093069 | 24.62603187 |
| 7.96E-05    | 0.007406212 | 75.94137236 | 166.9102258 |
| 9.08E-05    | 0.008388204 | 49.48186273 | 112.292455  |
| 9.81E-05    | 0.008999608 | 6.879913443 | 20.41768124 |
| 0.000109933 | 0.009943284 | 5.039564106 | 29.74729274 |
| 0.000111797 | 0.010042619 | 124.6338628 | 275.5420644 |
| 0.000115416 | 0.010297141 | 61.69607997 | 147.6943995 |
| 0.000118654 | 0.010514498 | 102.9200886 | 267.4325959 |
| 0.00012211  | 0.010658232 | 489.1089394 | 6.364289681 |
| 0.000122714 | 0.010658232 | 18.39058641 | 5.216721631 |
| 0.000127555 | 0.010862886 | 56.43732083 | 22.0257548  |
| 0.000130916 | 0.010868443 | 5.257462403 | 16.98011581 |
| 0.000129593 | 0.010868443 | 3079.406187 | 7184.056136 |
| 0.000130753 | 0.010868443 | 837.1290634 | 266.2930779 |
| 0.000141629 | 0.011465843 | 14.84967457 | 33.46506985 |
| 0.000146637 | 0.011511383 | 67.48085476 | 147.3413613 |
| 0.000144827 | 0.011511383 | 15.78482415 | 41.04643251 |
| 0.000146962 | 0.011511383 | 34.71162527 | 10.77392638 |
| 0.000149448 | 0.011597695 | 2544.483018 | 846.8397632 |

<https://jitc.bmj.com>



|    |             |             |             |             |
|----|-------------|-------------|-------------|-------------|
| 1  |             |             |             |             |
| 2  | 0.00016138  | 0.012402463 | 146.4304118 | 63.86089727 |
| 3  | 0.00016171  | 0.012402463 | 6.124263629 | 27.59638533 |
| 4  | 0.000185327 | 0.013731969 | 8.516591832 | 45.53421974 |
| 5  | 0.000185019 | 0.013731969 | 171.3941014 | 458.3649208 |
| 6  | 0.000184213 | 0.013731969 | 111.9038974 | 44.2841096  |
| 7  | 0.000190659 | 0.013969208 | 3.665350067 | 22.76930208 |
| 8  | 0.000195882 | 0.014038231 | 80.78070516 | 26.92339291 |
| 9  | 0.000194541 | 0.014038231 | 21.83526645 | 61.67012955 |
| 10 | 0.000225439 | 0.015857575 | 128.2089245 | 298.4768308 |
| 11 | 0.000237293 | 0.016379486 | 47.01260964 | 185.7974747 |
| 12 | 0.000235093 | 0.016379486 | 61.20072553 | 12.11190206 |
| 13 | 0.000246217 | 0.016818386 | 33.74272631 | 120.2957116 |
| 14 | 0.00024809  | 0.016858583 | 316.1372207 | 952.4672428 |
| 15 | 0.000264305 | 0.01777619  | 21.15807689 | 101.1828755 |
| 16 | 0.000274032 | 0.018243272 | 4.335957641 | 20.31710693 |
| 17 | 0.000280794 | 0.018599063 | 69.83490008 | 174.3838286 |
| 18 | 0.000301978 | 0.019802238 | 52.58648208 | 125.6780025 |
| 19 | 0.000331314 | 0.021195989 | 23.64276486 | 17.86603792 |
| 20 | 0.000334907 | 0.021321843 | 77.54053226 | 30.43773834 |
| 21 | 0.000345183 | 0.021869928 | 34.88062187 | 14.58644567 |
| 22 | 0.000356073 | 0.02220686  | 84.07730228 | 26.16153948 |
| 23 | 0.000358023 | 0.02220686  | 21.06314279 | 65.07590846 |
| 24 | 0.000358861 | 0.02220686  | 6.056773802 | 30.15704382 |
| 25 | 0.000359391 | 0.02220686  | 1899.062693 | 696.6974957 |
| 26 | 0.000365465 | 0.02239757  | 22.00917368 | 52.24821499 |
| 27 | 0.000371358 | 0.022652828 | 8.653851554 | 26.60110088 |
| 28 | 0.000382257 | 0.023102752 | 75.30622952 | 203.1602286 |
| 29 | 0.000381146 | 0.023102752 | 66.44182138 | 217.5135555 |
| 30 | 0.000388757 | 0.023387864 | 16.18111315 | 47.93255351 |
| 31 | 0.000393095 | 0.023540853 | 41.39999856 | 109.6931973 |
| 32 | 0.000396623 | 0.023644132 | 22.5095697  | 51.05323649 |
| 33 | 0.000411756 | 0.024325107 | 34.41187204 | 10.30526631 |
| 34 | 0.000418766 | 0.024454319 | 28.11915801 | 105.1121494 |
| 35 | 0.000429751 | 0.024699831 | 46.66618483 | 14.66640003 |
| 36 | 0.000438796 | 0.024810321 | 147.2047532 | 68.24050409 |
| 37 | 0.000451337 | 0.025404659 | 7.388303335 | 19.92961948 |
| 38 | 0.000454182 | 0.025455523 | 121.657761  | 53.03578418 |
| 39 | 0.000477017 | 0.026176082 | 3.977620347 | 21.29224477 |
| 40 | 0.000474511 | 0.026176082 | 65.84734925 | 19.79928727 |
| 41 | 0.000501835 | 0.027196533 | 24.07754606 | 10.27493665 |
| 42 | 0.000521828 | 0.028163663 | 11.43839543 | 49.83951959 |
| 43 | 0.000524802 | 0.028208091 | 514.6876492 | 165.9713542 |
| 44 | 0.000533096 | 0.028420974 | 31.54243544 | 161.0706729 |
| 45 | 0.000568119 | 0.02980351  | 68.8488098  | 163.9911292 |
| 46 | 0.000577887 | 0.030195172 | 178.8295173 | 471.6846153 |
| 47 | 0.000593399 | 0.030882676 | 62.06009454 | 20.07462523 |
| 48 |             |             |             |             |
| 49 |             |             |             |             |
| 50 |             |             |             |             |
| 51 |             |             |             |             |
| 52 |             |             |             |             |
| 53 |             |             |             |             |
| 54 |             |             |             |             |
| 55 |             |             |             |             |
| 56 |             |             |             |             |
| 57 |             |             |             |             |
| 58 |             |             |             |             |
| 59 |             |             |             |             |
| 60 |             |             |             |             |

<https://jitc.bmj.com>

1  
2  
3  
4  
5  
6  
7  
8  
9  
10  
11  
12  
13  
14  
15  
16  
17  
18  
19  
20  
21  
22  
23  
24  
25  
26  
27  
28  
29  
30  
31  
32  
33  
34  
35  
36  
37  
38  
39  
40  
41  
42  
43  
44  
45  
46  
47  
48  
49  
50  
51  
52  
53  
54  
55  
56  
57  
58  
59  
60

|             |             |             |             |
|-------------|-------------|-------------|-------------|
| 0.000603952 | 0.030982114 | 20.46449851 | 84.70269217 |
| 0.000599812 | 0.030982114 | 10.44927026 | 30.55182391 |
| 0.000604118 | 0.030982114 | 14.24484439 | 54.05539947 |
| 0.000619391 | 0.031295175 | 41.18519397 | 16.27713103 |
| 0.000615154 | 0.031295175 | 56.53404882 | 123.2123819 |
| 0.000627108 | 0.031511589 | 214.5752098 | 76.05847167 |
| 0.000643682 | 0.032220936 | 21.54929745 | 5.819827624 |
| 0.000646248 | 0.032226396 | 14.13067493 | 47.51351066 |
| 0.000653603 | 0.032469733 | 6.094632269 | 18.38875371 |
| 0.000656527 | 0.032491883 | 33.32074603 | 9.035659916 |
| 0.00067201  | 0.033009011 | 15.36743926 | 46.01868015 |
| 0.000695482 | 0.03321626  | 18.67935288 | 2.568264425 |
| 0.000716005 | 0.033900385 | 44.35311707 | 104.0076924 |
| 0.000719739 | 0.033932218 | 56.55444463 | 14.63326713 |
| 0.000724439 | 0.033932218 | 109.4626683 | 45.20938528 |
| 0.000723702 | 0.033932218 | 37.71619419 | 85.58458021 |
| 0.000744986 | 0.034403143 | 200.3665423 | 87.53627815 |
| 0.000747962 | 0.034419352 | 10.55191564 | 32.63630164 |
| 0.000763589 | 0.035015635 | 245.8508088 | 109.1128949 |
| 0.00083368  | 0.036690313 | 12.65574921 | 32.01060265 |
| 0.00083332  | 0.036690313 | 20.71272823 | 199.2499568 |
| 0.000828136 | 0.036690313 | 8.465151118 | 46.02210539 |
| 0.0008593   | 0.037520226 | 222.8118673 | 90.72425698 |
| 0.00086112  | 0.037520226 | 178.4844601 | 47.5185724  |
| 0.000871388 | 0.037726906 | 52.38998748 | 135.3684824 |
| 0.000918196 | 0.039535524 | 4.460042808 | 21.6878275  |
| 0.000977783 | 0.041500409 | 54.79371165 | 168.6547309 |
| 0.00100084  | 0.042070547 | 194.4370486 | 430.7406562 |
| 0.001030666 | 0.042699909 | 135.1770314 | 48.00007521 |
| 0.001075553 | 0.04367677  | 30.41247174 | 7.554368973 |
| 0.001082345 | 0.04367677  | 8.306034063 | 22.82054444 |
| 0.001159003 | 0.04577228  | 219.6864467 | 68.85943166 |
| 0.001178273 | 0.045991204 | 2.602686162 | 17.43944975 |
| 0.001227066 | 0.047193479 | 13.23657321 | 38.73787146 |
| 0.001256739 | 0.048052879 | 18.20290273 | 4.148035674 |
| 0.001297963 | 0.048916031 | 926.3109425 | 366.8499935 |
| 0.001314432 | 0.049253655 | 6.999002758 | 21.08528689 |
| 0.001338224 | 0.049860257 | 12207.32039 | 4131.402345 |
| 0.001337664 | 0.049860257 | 424.2267501 | 162.033007  |

<https://jitc.bmj.com>

© 2000-2018 QIAGEN. All rights reserved.

| <b>Ingenuity Canonical Pathways</b>                                            | <b>-log(p-value)</b> | <b>Ratio</b> |
|--------------------------------------------------------------------------------|----------------------|--------------|
| <b>Pathogenesis of Multiple Sclerosis</b>                                      | 5.96E+00             | 4.44E-01     |
| <b>Agranulocyte Adhesion and Diapedesis</b>                                    | 5.45E+00             | 5.70E-02     |
| <b>Granulocyte Adhesion and Diapedesis</b>                                     | 4.89E+00             | 5.52E-02     |
| Th1 and Th2 Activation Pathway                                                 | 4.03E+00             | 4.86E-02     |
| <b>Neuroinflammation Signaling Pathway</b>                                     | 3.56E+00             | 3.54E-02     |
| <b>Th1 Pathway</b>                                                             | 3.41E+00             | 5.19E-02     |
| <b>Interferon Signaling</b>                                                    | 3.38E+00             | 1.11E-01     |
| Type I Diabetes Mellitus Signaling                                             | 3.09E+00             | 5.41E-02     |
| <b>Inflammasome pathway</b>                                                    | 3.02E+00             | 1.50E-01     |
| Role of JAK1 and JAK3 in $\text{C}\epsilon\text{z}\text{c}$ Cytokine Signaling | 3.01E+00             | 6.49E-02     |
| IL-17A Signaling in Gastric Cells                                              | 2.74E+00             | 1.20E-01     |
| IL-15 Production                                                               | 2.59E+00             | 1.07E-01     |
| Superoxide Radicals Degradation                                                | 2.59E+00             | 2.50E-01     |
| TNFR2 Signaling                                                                | 2.50E+00             | 1.00E-01     |
| T Helper Cell Differentiation                                                  | 2.23E+00             | 5.48E-02     |
| Toll-like Receptor Signaling                                                   | 2.17E+00             | 5.26E-02     |
| Oncostatin M Signaling                                                         | 2.15E+00             | 7.50E-02     |
| Role of MAPK Signaling in the Pathogenesis of Influenza                        | 2.13E+00             | 5.13E-02     |
| Acute Phase Response Signaling                                                 | 2.09E+00             | 3.41E-02     |
| Role of Hypercytokinemia/hyperchemokinaemia in the Pathogenesis of             | 2.06E+00             | 6.98E-02     |
| iNOS Signaling                                                                 | 2.01E+00             | 6.67E-02     |
| Triacylglycerol Biosynthesis                                                   | 1.98E+00             | 6.52E-02     |
| Crosstalk between Dendritic Cells and Natural Killer Cells                     | 1.94E+00             | 4.49E-02     |
| Primary Immunodeficiency Signaling                                             | 1.91E+00             | 6.12E-02     |
| Differential Regulation of Cytokine Production in Macrophages and T            | 1.88E+00             | 1.11E-01     |
| Communication between Innate and Adaptive Immune Cells                         | 1.84E+00             | 4.21E-02     |
| Protein Ubiquitination Pathway                                                 | 1.79E+00             | 2.64E-02     |
| Th2 Pathway                                                                    | 1.78E+00             | 3.33E-02     |
| STAT3 Pathway                                                                  | 1.72E+00             | 3.88E-02     |
| Choline Degradation I                                                          | 1.71E+00             | 5.00E-01     |
| Differential Regulation of Cytokine Production in Intestinal Epithelial        | 1.67E+00             | 8.70E-02     |
| Role of JAK1, JAK2 and TYK2 in Interferon Signaling                            | 1.64E+00             | 8.33E-02     |
| CDP-diacylglycerol Biosynthesis I                                              | 1.64E+00             | 8.33E-02     |
| Role of JAK family kinases in IL-6-type Cytokine Signaling                     | 1.60E+00             | 8.00E-02     |
| Ethanol Degradation IV                                                         | 1.60E+00             | 8.00E-02     |
| Phosphatidylglycerol Biosynthesis II (Non-plastidic)                           | 1.57E+00             | 7.69E-02     |
| Eicosanoid Signaling                                                           | 1.55E+00             | 4.48E-02     |
| Tetrahydrobiopterin Biosynthesis I                                             | 1.53E+00             | 3.33E-01     |
| Tetrahydrobiopterin Biosynthesis II                                            | 1.53E+00             | 3.33E-01     |
| Neuroprotective Role of THOP1 in Alzheimer's Disease                           | 1.51E+00             | 3.33E-02     |
| Atherosclerosis Signaling                                                      | 1.43E+00             | 3.15E-02     |
| TREM1 Signaling                                                                | 1.42E+00             | 4.00E-02     |
| Hepatic Fibrosis / Hepatic Stellate Cell Activation                            | 1.42E+00             | 2.67E-02     |

<https://jitc.bmj.com>

|    |                                                                      |          |          |
|----|----------------------------------------------------------------------|----------|----------|
| 1  |                                                                      |          |          |
| 2  | Retinoate Biosynthesis II                                            | 1.41E+00 | 2.50E-01 |
| 3  | Phenylethylamine Degradation I                                       | 1.41E+00 | 2.50E-01 |
| 4  | Acetate Conversion to Acetyl-CoA                                     | 1.41E+00 | 2.50E-01 |
| 5  | Cytotoxic T Lymphocyte-mediated Apoptosis of Target Cells            | 1.40E+00 | 6.25E-02 |
| 6  | 4-1BB Signaling in T Lymphocytes                                     | 1.40E+00 | 6.25E-02 |
| 7  | Role of Macrophages, Fibroblasts and Endothelial Cells in Rheumatoid | 1.40E+00 | 2.19E-02 |
| 8  | Chemokine Signaling                                                  | 1.39E+00 | 3.90E-02 |
| 9  | VDR/RXR Activation                                                   | 1.38E+00 | 3.85E-02 |
| 10 | GM-CSF Signaling                                                     | 1.37E+00 | 3.80E-02 |
| 11 | Dendritic Cell Maturation                                            | 1.36E+00 | 2.58E-02 |
| 12 | Role of JAK2 in Hormone-like Cytokine Signaling                      | 1.36E+00 | 5.88E-02 |
| 13 | TWEAK Signaling                                                      | 1.33E+00 | 5.71E-02 |
| 14 | Iron homeostasis signaling pathway                                   | 1.33E+00 | 2.92E-02 |
| 15 | Complement System                                                    | 1.29E+00 | 5.41E-02 |
| 16 | Notch Signaling                                                      | 1.27E+00 | 5.26E-02 |
| 17 | Inhibition of Matrix Metalloproteases                                | 1.25E+00 | 5.13E-02 |
| 18 | Prolactin Signaling                                                  | 1.24E+00 | 3.37E-02 |
| 19 | JAK/Stat Signaling                                                   | 1.24E+00 | 3.37E-02 |
| 20 | IL-17 Signaling                                                      | 1.22E+00 | 3.30E-02 |
| 21 | Role of PKR in Interferon Induction and Antiviral Response           | 1.21E+00 | 4.88E-02 |
| 22 | LPS/IL-1 Mediated Inhibition of RXR Function                         | 1.16E+00 | 2.25E-02 |
| 23 | CTLA4 Signaling in Cytotoxic T Lymphocytes                           | 1.13E+00 | 3.03E-02 |
| 24 | Thyroid Cancer Signaling                                             | 1.12E+00 | 4.35E-02 |
| 25 | Role of IL-17F in Allergic Inflammatory Airway Diseases              | 1.12E+00 | 4.35E-02 |
| 26 | Airway Pathology in Chronic Obstructive Pulmonary Disease            | 1.12E+00 | 1.25E-01 |
| 27 | Tryptophan Degradation to 2-amino-3-carboxymuconate Semialdehy       | 1.12E+00 | 1.25E-01 |
| 28 | Salvage Pathways of Pyrimidine Deoxyribonucleotides                  | 1.12E+00 | 1.25E-01 |
| 29 | nNOS Signaling in Neurons                                            | 1.11E+00 | 4.26E-02 |
| 30 | Graft-versus-Host Disease Signaling                                  | 1.09E+00 | 4.17E-02 |
| 31 | Hematopoiesis from Pluripotent Stem Cells                            | 1.09E+00 | 4.17E-02 |
| 32 | TNFR1 Signaling                                                      | 1.06E+00 | 4.00E-02 |
| 33 | Tec Kinase Signaling                                                 | 1.06E+00 | 2.35E-02 |
| 34 | Antioxidant Action of Vitamin C                                      | 1.04E+00 | 2.78E-02 |
| 35 | GDP-glucose Biosynthesis                                             | 1.03E+00 | 1.00E-01 |
| 36 | Amyotrophic Lateral Sclerosis Signaling                              | 1.01E+00 | 2.70E-02 |
| 37 | Role of Cytokines in Mediating Communication between Immune Cell     | 1.00E+00 | 3.70E-02 |
| 38 | Ephrin Receptor Signaling                                            | 9.97E-01 | 2.23E-02 |
| 39 | Huntington's Disease Signaling                                       | 9.94E-01 | 2.00E-02 |
| 40 | Glucose and Glucose-1-phosphate Degradation                          | 9.87E-01 | 9.09E-02 |
| 41 | Unfolded protein response                                            | 9.78E-01 | 3.57E-02 |
| 42 | Glutamate Receptor Signaling                                         | 9.66E-01 | 3.51E-02 |
| 43 | p38 MAPK Signaling                                                   | 9.39E-01 | 2.50E-02 |
| 44 | Leukotriene Biosynthesis                                             | 9.19E-01 | 7.69E-02 |
| 45 | Glycogen Degradation II                                              | 9.19E-01 | 7.69E-02 |
| 46 | Bile Acid Biosynthesis, Neutral Pathway                              | 9.19E-01 | 7.69E-02 |
| 47 | Induction of Apoptosis by HIV1                                       | 9.17E-01 | 3.28E-02 |
| 48 |                                                                      |          |          |
| 49 |                                                                      |          |          |
| 50 |                                                                      |          |          |
| 51 |                                                                      |          |          |
| 52 |                                                                      |          |          |
| 53 |                                                                      |          |          |
| 54 |                                                                      |          |          |
| 55 |                                                                      |          |          |
| 56 |                                                                      |          |          |
| 57 |                                                                      |          |          |
| 58 |                                                                      |          |          |
| 59 |                                                                      |          |          |
| 60 |                                                                      |          |          |

<https://jitc.bmj.com>

|    |                                                                 |          |          |
|----|-----------------------------------------------------------------|----------|----------|
| 1  |                                                                 |          |          |
| 2  | iCOS-iCOSL Signaling in T Helper Cells                          | 9.16E-01 | 2.44E-02 |
| 3  | Retinoic acid Mediated Apoptosis Signaling                      | 9.05E-01 | 3.23E-02 |
| 4  | Phospholipases                                                  | 9.05E-01 | 3.23E-02 |
| 5  | Glucocorticoid Receptor Signaling                               | 8.99E-01 | 1.74E-02 |
| 6  | Regulation of Cellular Mechanics by Calpain Protease            | 8.94E-01 | 3.17E-02 |
| 7  | Sperm Motility                                                  | 8.86E-01 | 2.36E-02 |
| 8  | Renin-Angiotensin Signaling                                     | 8.79E-01 | 2.34E-02 |
| 9  | NAD biosynthesis II (from tryptophan)                           | 8.61E-01 | 6.67E-02 |
| 10 | Glycogen Degradation III                                        | 8.61E-01 | 6.67E-02 |
| 11 | Granzyme B Signaling                                            | 8.35E-01 | 6.25E-02 |
| 12 | Remodeling of Epithelial Adherens Junctions                     | 8.31E-01 | 2.90E-02 |
| 13 | CNTF Signaling                                                  | 8.21E-01 | 2.86E-02 |
| 14 | Thrombopoietin Signaling                                        | 8.11E-01 | 2.82E-02 |
| 15 | RAN Signaling                                                   | 8.10E-01 | 5.88E-02 |
| 16 | Leukocyte Extravasation Signaling                               | 8.09E-01 | 1.90E-02 |
| 17 | Ephrin B Signaling                                              | 7.92E-01 | 2.74E-02 |
| 18 | 1D-myo-inositol Hexakisphosphate Biosynthesis II (Mammalian)    | 7.66E-01 | 5.26E-02 |
| 19 | D-myo-inositol (1,3,4)-trisphosphate Biosynthesis               | 7.66E-01 | 5.26E-02 |
| 20 | IL-12 Signaling and Production in Macrophages                   | 7.59E-01 | 2.05E-02 |
| 21 | Granzyme A Signaling                                            | 7.46E-01 | 5.00E-02 |
| 22 | The Visual Cycle                                                | 7.46E-01 | 5.00E-02 |
| 23 | CD40 Signaling                                                  | 7.39E-01 | 2.53E-02 |
| 24 | Oxidative Ethanol Degradation III                               | 7.27E-01 | 4.76E-02 |
| 25 | IL-15 Signaling                                                 | 7.14E-01 | 2.44E-02 |
| 26 | Polyamine Regulation in Colon Cancer                            | 7.09E-01 | 4.55E-02 |
| 27 | Growth Hormone Signaling                                        | 6.91E-01 | 2.35E-02 |
| 28 | Leptin Signaling in Obesity                                     | 6.83E-01 | 2.33E-02 |
| 29 | IL-22 Signaling                                                 | 6.75E-01 | 4.17E-02 |
| 30 | Tumoricidal Function of Hepatic Natural Killer Cells            | 6.75E-01 | 4.17E-02 |
| 31 | Superpathway of D-myo-inositol (1,4,5)-trisphosphate Metabolism | 6.75E-01 | 4.17E-02 |
| 32 | IL-3 Signaling                                                  | 6.61E-01 | 2.25E-02 |
| 33 | Tryptophan Degradation III (Eukaryotic)                         | 6.59E-01 | 4.00E-02 |
| 34 | Dopamine-DARPP32 Feedback in cAMP Signaling                     | 6.59E-01 | 1.83E-02 |
| 35 | Opioid Signaling Pathway                                        | 6.45E-01 | 1.62E-02 |
| 36 | Lipid Antigen Presentation by CD1                               | 6.44E-01 | 3.85E-02 |
| 37 | Gluconeogenesis I                                               | 6.44E-01 | 3.85E-02 |
| 38 | Aldosterone Signaling in Epithelial Cells                       | 6.39E-01 | 1.79E-02 |
| 39 | FLT3 Signaling in Hematopoietic Progenitor Cells                | 6.33E-01 | 2.15E-02 |
| 40 | Death Receptor Signaling                                        | 6.33E-01 | 2.15E-02 |
| 41 | Bladder Cancer Signaling                                        | 6.26E-01 | 2.13E-02 |
| 42 | CCR5 Signaling in Macrophages                                   | 6.20E-01 | 2.11E-02 |
| 43 | GABA Receptor Signaling                                         | 6.20E-01 | 2.11E-02 |
| 44 | Colorectal Cancer Metastasis Signaling                          | 6.18E-01 | 1.57E-02 |
| 45 | Apoptosis Signaling                                             | 6.13E-01 | 2.08E-02 |
| 46 | PDGF Signaling                                                  | 6.13E-01 | 2.08E-02 |
| 47 | G Protein Signaling Mediated by Tubby                           | 5.66E-01 | 3.12E-02 |

<https://jitc.bmj.com>

|    |                                                                      |          |          |
|----|----------------------------------------------------------------------|----------|----------|
| 1  |                                                                      |          |          |
| 2  | FAK Signaling                                                        | 5.58E-01 | 1.90E-02 |
| 3  | NF- $\kappa$ B Signaling                                             | 5.53E-01 | 1.60E-02 |
| 4  | Circadian Rhythm Signaling                                           | 5.44E-01 | 2.94E-02 |
| 5  | Retinoate Biosynthesis I                                             | 5.44E-01 | 2.94E-02 |
| 6  | MIF-mediated Glucocorticoid Regulation                               | 5.34E-01 | 2.86E-02 |
| 7  | Axonal Guidance Signaling                                            | 5.30E-01 | 1.31E-02 |
| 8  | Production of Nitric Oxide and Reactive Oxygen Species in Macrophag  | 5.25E-01 | 1.55E-02 |
| 9  | B Cell Development                                                   | 5.23E-01 | 2.78E-02 |
| 10 | Regulation of the Epithelial-Mesenchymal Transition Pathway          | 5.21E-01 | 1.54E-02 |
| 11 | IGF-1 Signaling                                                      | 5.20E-01 | 1.79E-02 |
| 12 | Ethanol Degradation II                                               | 5.13E-01 | 2.70E-02 |
| 13 | NRF2-mediated Oxidative Stress Response                              | 5.06E-01 | 1.51E-02 |
| 14 | Neuropathic Pain Signaling In Dorsal Horn Neurons                    | 5.05E-01 | 1.74E-02 |
| 15 | T Cell Receptor Signaling                                            | 5.05E-01 | 1.74E-02 |
| 16 | Antigen Presentation Pathway                                         | 5.04E-01 | 2.63E-02 |
| 17 | April Mediated Signaling                                             | 4.95E-01 | 2.56E-02 |
| 18 | tRNA Charging                                                        | 4.95E-01 | 2.56E-02 |
| 19 | ERK/MAPK Signaling                                                   | 4.88E-01 | 1.47E-02 |
| 20 | Calcium Signaling                                                    | 4.81E-01 | 1.46E-02 |
| 21 | Pancreatic Adenocarcinoma Signaling                                  | 4.80E-01 | 1.67E-02 |
| 22 | B Cell Activating Factor Signaling                                   | 4.77E-01 | 2.44E-02 |
| 23 | nNOS Signaling in Skeletal Muscle Cells                              | 4.77E-01 | 2.44E-02 |
| 24 | tRNA Splicing                                                        | 4.68E-01 | 2.38E-02 |
| 25 | Retinol Biosynthesis                                                 | 4.68E-01 | 2.38E-02 |
| 26 | HIF1 $\alpha$ Signaling                                              | 4.62E-01 | 1.61E-02 |
| 27 | MIF Regulation of Innate Immunity                                    | 4.60E-01 | 2.33E-02 |
| 28 | Serotonin Receptor Signaling                                         | 4.60E-01 | 2.33E-02 |
| 29 | Osteoarthritis Pathway                                               | 4.60E-01 | 1.42E-02 |
| 30 | Synaptic Long Term Potentiation                                      | 4.53E-01 | 1.59E-02 |
| 31 | FXR/RXR Activation                                                   | 4.53E-01 | 1.59E-02 |
| 32 | IL-9 Signaling                                                       | 4.44E-01 | 2.22E-02 |
| 33 | Dermatan Sulfate Biosynthesis (Late Stages)                          | 4.37E-01 | 2.17E-02 |
| 34 | Role of Tissue Factor in Cancer                                      | 4.36E-01 | 1.54E-02 |
| 35 | PI3K/AKT Signaling                                                   | 4.32E-01 | 1.53E-02 |
| 36 | Autoimmune Thyroid Disease Signaling                                 | 4.22E-01 | 2.08E-02 |
| 37 | IL-6 Signaling                                                       | 4.20E-01 | 1.49E-02 |
| 38 | Chondroitin Sulfate Biosynthesis (Late Stages)                       | 4.15E-01 | 2.04E-02 |
| 39 | Role of Pattern Recognition Receptors in Recognition of Bacteria and | 4.08E-01 | 1.46E-02 |
| 40 | Amyloid Processing                                                   | 4.02E-01 | 1.96E-02 |
| 41 | Docosahexaenoic Acid (DHA) Signaling                                 | 3.95E-01 | 1.92E-02 |
| 42 | Systemic Lupus Erythematosus Signaling                               | 3.95E-01 | 1.29E-02 |
| 43 | Phagosome Maturation                                                 | 3.68E-01 | 1.35E-02 |
| 44 | Chondroitin Sulfate Biosynthesis                                     | 3.65E-01 | 1.75E-02 |
| 45 | Nur77 Signaling in T Lymphocytes                                     | 3.54E-01 | 1.69E-02 |
| 46 | Dermatan Sulfate Biosynthesis                                        | 3.54E-01 | 1.69E-02 |
| 47 | Activation of IRF by Cytosolic Pattern Recognition Receptors         | 3.33E-01 | 1.59E-02 |
| 48 |                                                                      |          |          |
| 49 |                                                                      |          |          |
| 50 |                                                                      |          |          |
| 51 |                                                                      |          |          |
| 52 |                                                                      |          |          |
| 53 |                                                                      |          |          |
| 54 |                                                                      |          |          |
| 55 |                                                                      |          |          |
| 56 |                                                                      |          |          |
| 57 |                                                                      |          |          |
| 58 |                                                                      |          |          |
| 59 |                                                                      |          |          |
| 60 |                                                                      |          |          |

<https://jitc.bmj.com>



|    |                                                                         |          |          |
|----|-------------------------------------------------------------------------|----------|----------|
| 1  |                                                                         |          |          |
| 2  | Hepatic Cholestasis                                                     | 3.30E-01 | 1.25E-02 |
| 3  | Calcium-induced T Lymphocyte Apoptosis                                  | 3.19E-01 | 1.52E-02 |
| 4  | PKC $\epsilon$ Signaling in T Lymphocytes                               | 3.15E-01 | 1.21E-02 |
| 5  | Lymphotoxin $\alpha$ Receptor Signaling                                 | 3.14E-01 | 1.49E-02 |
| 6  | EGF Signaling                                                           | 3.10E-01 | 1.47E-02 |
| 7  | Cdc42 Signaling                                                         | 3.09E-01 | 1.20E-02 |
| 8  | IL-10 Signaling                                                         | 3.05E-01 | 1.45E-02 |
| 9  | Role of IL-17A in Arthritis                                             | 3.05E-01 | 1.45E-02 |
| 10 | IL-2 Signaling                                                          | 3.01E-01 | 1.43E-02 |
| 11 | Mitochondrial Dysfunction                                               | 2.98E-01 | 1.17E-02 |
| 12 | GNRH Signaling                                                          | 2.98E-01 | 1.17E-02 |
| 13 | eNOS Signaling                                                          | 2.96E-01 | 1.16E-02 |
| 14 | Wnt/ $\beta$ -catenin Signaling                                         | 2.96E-01 | 1.16E-02 |
| 15 | Melatonin Signaling                                                     | 2.93E-01 | 1.39E-02 |
| 16 | MSP-ROn Signaling Pathway                                               | 2.93E-01 | 1.39E-02 |
| 17 | G-Protein Coupled Receptor Signaling                                    | 2.79E-01 | 1.06E-02 |
| 18 | Glioma Invasiveness Signaling                                           | 2.77E-01 | 1.32E-02 |
| 19 | Heparan Sulfate Biosynthesis (Late Stages)                              | 2.77E-01 | 1.32E-02 |
| 20 | Synaptic Long Term Depression                                           | 2.75E-01 | 1.11E-02 |
| 21 | Dopamine Receptor Signaling                                             | 2.73E-01 | 1.30E-02 |
| 22 | IL-17A Signaling in Airway Cells                                        | 2.69E-01 | 1.28E-02 |
| 23 | Role of PI3K/AKT Signaling in the Pathogenesis of Influenza             | 2.65E-01 | 1.27E-02 |
| 24 | Role of BRCA1 in DNA Damage Response                                    | 2.62E-01 | 1.25E-02 |
| 25 | PPAR $\alpha$ /RXR $\alpha$ Activation                                  | 2.61E-01 | 1.08E-02 |
| 26 | Protein Kinase A Signaling                                              | 2.53E-01 | 9.98E-03 |
| 27 | Xenobiotic Metabolism Signaling                                         | 2.52E-01 | 1.01E-02 |
| 28 | RAR Activation                                                          | 2.52E-01 | 1.05E-02 |
| 29 | Heparan Sulfate Biosynthesis                                            | 2.51E-01 | 1.20E-02 |
| 30 | Neurotrophin/TRK Signaling                                              | 2.51E-01 | 1.20E-02 |
| 31 | Small Cell Lung Cancer Signaling                                        | 2.45E-01 | 1.18E-02 |
| 32 | Allograft Rejection Signaling                                           | 2.45E-01 | 1.18E-02 |
| 33 | Regulation of IL-2 Expression in Activated and Anergic T Lymphocytes    | 2.42E-01 | 1.16E-02 |
| 34 | Endothelin-1 Signaling                                                  | 2.39E-01 | 1.02E-02 |
| 35 | Erythropoietin Signaling                                                | 2.38E-01 | 1.15E-02 |
| 36 | Renal Cell Carcinoma Signaling                                          | 2.35E-01 | 1.14E-02 |
| 37 | Adrenomedullin signaling pathway                                        | 2.31E-01 | 1.00E-02 |
| 38 | Altered T Cell and B Cell Signaling in Rheumatoid Arthritis             | 2.29E-01 | 1.11E-02 |
| 39 | OX40 Signaling Pathway                                                  | 2.26E-01 | 1.10E-02 |
| 40 | IL-7 Signaling Pathway                                                  | 2.26E-01 | 1.10E-02 |
| 41 | IL-8 Signaling                                                          | 2.25E-01 | 9.85E-03 |
| 42 | Fc $\gamma$ Receptor-mediated Phagocytosis in Macrophages and Monocytes | 2.20E-01 | 1.08E-02 |
| 43 | PEDF Signaling                                                          | 2.20E-01 | 1.08E-02 |
| 44 | HER-2 Signaling in Breast Cancer                                        | 2.18E-01 | 1.06E-02 |
| 45 | VEGF Family Ligand-Receptor Interactions                                | 2.18E-01 | 1.06E-02 |
| 46 | IL-4 Signaling                                                          | 2.15E-01 | 1.05E-02 |
| 47 | Salvage Pathways of Pyrimidine Ribonucleotides                          | 2.09E-01 | 1.03E-02 |
| 48 |                                                                         |          |          |
| 49 |                                                                         |          |          |
| 50 |                                                                         |          |          |
| 51 |                                                                         |          |          |
| 52 |                                                                         |          |          |
| 53 |                                                                         |          |          |
| 54 |                                                                         |          |          |
| 55 |                                                                         |          |          |
| 56 |                                                                         |          |          |
| 57 |                                                                         |          |          |
| 58 |                                                                         |          |          |
| 59 |                                                                         |          |          |
| 60 |                                                                         |          |          |

<https://jitc.bmj.com>

|    |                                                                    |          |          |
|----|--------------------------------------------------------------------|----------|----------|
| 1  |                                                                    |          |          |
| 2  | PPAR Signaling                                                     | 1.99E-01 | 9.90E-03 |
| 3  | Fc Epsilon RI Signaling                                            | 0.00E+00 | 8.00E-03 |
| 4  | Actin Cytoskeleton Signaling                                       | 0.00E+00 | 4.29E-03 |
| 5  | Aryl Hydrocarbon Receptor Signaling                                | 0.00E+00 | 7.09E-03 |
| 6  | LXR/RXR Activation                                                 | 0.00E+00 | 8.26E-03 |
| 7  | Clathrin-mediated Endocytosis Signaling                            | 0.00E+00 | 9.66E-03 |
| 8  | Role of NFAT in Regulation of the Immune Response                  | 0.00E+00 | 5.21E-03 |
| 9  | CXCR4 Signaling                                                    | 0.00E+00 | 5.85E-03 |
| 10 | CCR3 Signaling in Eosinophils                                      | 0.00E+00 | 7.35E-03 |
| 11 | CD28 Signaling in T Helper Cells                                   | 0.00E+00 | 7.58E-03 |
| 12 | Virus Entry via Endocytic Pathways                                 | 0.00E+00 | 8.62E-03 |
| 13 | Cellular Effects of Sildenafil (Viagra)                            | 0.00E+00 | 7.63E-03 |
| 14 | Relaxin Signaling                                                  | 0.00E+00 | 6.33E-03 |
| 15 | Thrombin Signaling                                                 | 0.00E+00 | 4.76E-03 |
| 16 | Molecular Mechanisms of Cancer                                     | 0.00E+00 | 7.61E-03 |
| 17 | HMGB1 Signaling                                                    | 0.00E+00 | 7.19E-03 |
| 18 | Cholecystokinin/Gastrin-mediated Signaling                         | 0.00E+00 | 9.35E-03 |
| 19 | Human Embryonic Stem Cell Pluripotency                             | 0.00E+00 | 6.99E-03 |
| 20 | Androgen Signaling                                                 | 0.00E+00 | 7.30E-03 |
| 21 | Role of NANOG in Mammalian Embryonic Stem Cell Pluripotency        | 0.00E+00 | 7.81E-03 |
| 22 | CREB Signaling in Neurons                                          | 0.00E+00 | 4.59E-03 |
| 23 | Glioma Signaling                                                   | 0.00E+00 | 8.33E-03 |
| 24 | EIF2 Signaling                                                     | 0.00E+00 | 4.41E-03 |
| 25 | PAK Signaling                                                      | 0.00E+00 | 9.35E-03 |
| 26 | Hereditary Breast Cancer Signaling                                 | 0.00E+00 | 6.67E-03 |
| 27 | Role of Osteoblasts, Osteoclasts and Chondrocytes in Rheumatoid Ar | 0.00E+00 | 8.58E-03 |
| 28 | Phospholipase C Signaling                                          | 0.00E+00 | 8.20E-03 |
| 29 | Ovarian Cancer Signaling                                           | 0.00E+00 | 6.67E-03 |
| 30 | Role of NFAT in Cardiac Hypertrophy                                | 0.00E+00 | 4.44E-03 |
| 31 | Breast Cancer Regulation by Stathmin1                              | 0.00E+00 | 4.74E-03 |
| 32 | RANK Signaling in Osteoclasts                                      | 0.00E+00 | 9.80E-03 |
| 33 | PI3K Signaling in B Lymphocytes                                    | 0.00E+00 | 7.35E-03 |
| 34 | Paxillin Signaling                                                 | 0.00E+00 | 8.40E-03 |
| 35 | Telomerase Signaling                                               | 0.00E+00 | 8.55E-03 |
| 36 | Mouse Embryonic Stem Cell Pluripotency                             | 0.00E+00 | 8.93E-03 |
| 37 | D-myo-inositol-5-phosphate Metabolism                              | 0.00E+00 | 6.17E-03 |
| 38 | D-myo-inositol (1,4,5,6)-Tetrakisphosphate Biosynthesis            | 0.00E+00 | 6.94E-03 |
| 39 | Superpathway of Inositol Phosphate Compounds                       | 0.00E+00 | 8.47E-03 |
| 40 | D-myo-inositol (3,4,5,6)-tetrakisphosphate Biosynthesis            | 0.00E+00 | 6.94E-03 |
| 41 | 3-phosphoinositide Degradation                                     | 0.00E+00 | 6.33E-03 |
| 42 | 3-phosphoinositide Biosynthesis                                    | 0.00E+00 | 4.98E-03 |
| 43 | GCE±q Signaling                                                    | 0.00E+00 | 6.21E-03 |
| 44 | UVA-Induced MAPK Signaling                                         | 0.00E+00 | 8.93E-03 |
| 45 | Adipogenesis pathway                                               | 0.00E+00 | 7.46E-03 |
| 46 | PTEN Signaling                                                     | 0.00E+00 | 8.00E-03 |
| 47 | Cardiac CE≤-adrenergic Signaling                                   | 0.00E+00 | 7.09E-03 |
| 48 |                                                                    |          |          |
| 49 |                                                                    |          |          |
| 50 |                                                                    |          |          |
| 51 |                                                                    |          |          |
| 52 |                                                                    |          |          |
| 53 |                                                                    |          |          |
| 54 |                                                                    |          |          |
| 55 |                                                                    |          |          |
| 56 |                                                                    |          |          |
| 57 |                                                                    |          |          |
| 58 |                                                                    |          |          |
| 59 |                                                                    |          |          |
| 60 |                                                                    |          |          |

<https://jitc.bmj.com>



1  
2  
3  
4  
5  
6  
7  
8  
9  
10  
11  
12  
13  
14  
15  
16  
17  
18  
19  
20  
21  
22  
23  
24  
25  
26  
27  
28  
29  
30  
31  
32  
33  
34  
35  
36  
37  
38  
39  
40  
41  
42  
43  
44  
45  
46  
47  
48  
49  
50  
51  
52  
53  
54  
55  
56  
57  
58  
59  
60

|                            |          |          |
|----------------------------|----------|----------|
| B Cell Receptor Signaling  | 0.00E+00 | 5.15E-03 |
| Insulin Receptor Signaling | 0.00E+00 | 6.80E-03 |
| Integrin Signaling         | 0.00E+00 | 9.13E-03 |
| cAMP-mediated signaling    | 0.00E+00 | 8.77E-03 |
| Gustation Pathway          | 0.00E+00 | 6.49E-03 |
| Sirtuin Signaling Pathway  | 0.00E+00 | 3.42E-03 |

Confidential: For Review Only

| z-score | Molecules                                                          |
|---------|--------------------------------------------------------------------|
| NaN     | CXCL10,CXCL11,CCL5,CXCL9                                           |
| NaN     | AOC3,CXCL10,CXCL11,CCL8,CXCL12,CCL17,IL1B,MMP2,CCL5,CXCL9,MMP25    |
| NaN     | CXCL10,CXCL11,CCL8,CXCL12,CCL17,IL1B,MMP2,CCL5,CXCL9,MMP25         |
| NaN     | STAT4,IL17RB,CD3E,CD274,IL2RA,JAK2,STAT1,CD8A,IRF1                 |
| 2.111   | CXCL10,BIRC7,SOD2,PLA2G2D,CXCL12,IL1B,JAK2,CCL5,STAT1,BIRC3,GRIN3A |
| 1.633   | STAT4,CD3E,CD274,JAK2,STAT1,CD8A,IRF1                              |
| 2       | JAK2,STAT1,TAP1,IRF1                                               |
| 2.449   | CD3E,GZMB,IL1B,JAK2,STAT1,IRF1                                     |
| NaN     | NLRP1,AIM2,IL1B                                                    |
| NaN     | IL15RA,IL21R,IL2RA,JAK2,STAT1                                      |
| NaN     | CXCL10,CXCL11,CCL5                                                 |
| NaN     | JAK2,STAT1,IRF1                                                    |
| NaN     | SOD2,CYGB                                                          |
| NaN     | TNFAIP3,BIRC3,TRAF1                                                |
| NaN     | STAT4,IL21R,IL2RA,STAT1                                            |
| NaN     | UBD,TNFAIP3,IL1B,TRAF1                                             |
| NaN     | MT2A,JAK2,STAT1                                                    |
| NaN     | CXCL10,PLA2G2D,RARRES3,CCL5                                        |
| 2.236   | RBP7,SOD2,CFB,IL1B,CP,JAK2                                         |
| NaN     | CXCL10,IL1B,CCL5                                                   |
| NaN     | JAK2,STAT1,IRF1                                                    |
| NaN     | AGPAT4,AGPAT5,PLPP3                                                |
| NaN     | IL15RA,TLN2,CAMK2D,TNFSF10                                         |
| NaN     | CD3E,CD8A,TAP1                                                     |
| NaN     | IL1B,CCL5                                                          |
| NaN     | CXCL10,IL1B,CCL5,CD8A                                              |
| NaN     | UBD,USP53,HSPH1,HSPA6,DNAJB1,BIRC3,TAP1                            |
| 0.447   | STAT4,IL17RB,CD3E,IL2RA,JAK2                                       |
| 0       | IL17RB,NTRK3,IL1B,JAK2                                             |
| NaN     | CHDH                                                               |
| NaN     | IL1B,CCL5                                                          |
| NaN     | JAK2,STAT1                                                         |
| NaN     | AGPAT4,AGPAT5                                                      |
| NaN     | JAK2,STAT1                                                         |
| NaN     | ACSS1,CYGB                                                         |
| NaN     | AGPAT4,AGPAT5                                                      |
| NaN     | PLA2G2D,RARRES3,DPEP2                                              |
| NaN     | GCH1                                                               |
| NaN     | GCH1                                                               |
| 0       | GZMA,CFD,GZMB,HTRA1                                                |
| NaN     | PLA2G2D,CXCL12,RARRES3,IL1B                                        |
| NaN     | NLRP12,IL1B,JAK2                                                   |
| NaN     | IL1B,MMP2,CCL5,STAT1,CXCL9                                         |

<https://jitc.bmj.com>

|    |                                             |
|----|---------------------------------------------|
| 1  |                                             |
| 2  | NaN RBP7                                    |
| 3  | NaN AOC3                                    |
| 4  | NaN ACSS1                                   |
| 5  | NaN CD3E,GZMB                               |
| 6  | NaN TNFRSF9,TRAF1                           |
| 7  | NaN CAMK2D,IL32,CXCL12,IL1B,JAK2,CCL5,TRAF1 |
| 8  | NaN CAMK2D,CXCL12,CCL5                      |
| 9  | NaN CXCL10,MXD1,CCL5                        |
| 10 | NaN CAMK2D,JAK2,STAT1                       |
| 11 | 2.236 STAT4,IL32,IL1B,JAK2,STAT1            |
| 12 | NaN JAK2,STAT1                              |
| 13 | NaN BIRC3,TRAF1                             |
| 14 | NaN GDF15,CP,ATP6VOD2,JAK2                  |
| 15 | NaN CFD,CFB                                 |
| 16 | NaN DTX4,LFNG                               |
| 17 | NaN MMP2,MMP25                              |
| 18 | NaN JAK2,STAT1,IRF1                         |
| 19 | NaN STAT4,JAK2,STAT1                        |
| 20 | NaN CXCL10,CXCL11,JAK2                      |
| 21 | NaN STAT1,IRF1                              |
| 22 | NaN HS3ST2,FABP4,IL1B,FABP5,FABP3           |
| 23 | NaN CD3E,JAK2,CD8A                          |
| 24 | NaN NTRK3,CXCL12                            |
| 25 | NaN CXCL10,IL1B                             |
| 26 | NaN MMP2                                    |
| 27 | NaN IDO1                                    |
| 28 | NaN CDA                                     |
| 29 | NaN GRIN3A,CAPN3                            |
| 30 | NaN GZMB,IL1B                               |
| 31 | NaN CD3E,CD8A                               |
| 32 | NaN TNFAIP3,BIRC3                           |
| 33 | NaN STAT4,TNFSF10,JAK2,STAT1                |
| 34 | NaN PLA2G2D,RARRES3,JAK2                    |
| 35 | NaN PGM5                                    |
| 36 | NaN BIRC3,GRIN3A,CAPN3                      |
| 37 | NaN IL32,IL1B                               |
| 38 | NaN CXCL12,EPHB3,JAK2,GRIN3A                |
| 39 | NaN DNMT1,UBD,HSPA6,DNAJB1,CAPN3            |
| 40 | NaN PGM5                                    |
| 41 | NaN HSPH1,HSPA6                             |
| 42 | NaN SLC38A1,GRIN3A                          |
| 43 | NaN PLA2G2D,IL1B,STAT1                      |
| 44 | NaN DPEP2                                   |
| 45 | NaN PGM5                                    |
| 46 | NaN CYP27A1                                 |
| 47 | NaN BIRC3,TRAF1                             |
| 48 |                                             |
| 49 |                                             |
| 50 |                                             |
| 51 |                                             |
| 52 |                                             |
| 53 |                                             |
| 54 |                                             |
| 55 |                                             |
| 56 |                                             |
| 57 |                                             |
| 58 |                                             |
| 59 |                                             |
| 60 |                                             |

<https://jitc.bmj.com>

|    |                                     |
|----|-------------------------------------|
| 1  |                                     |
| 2  | NaN CAMK2D,CD3E,IL2RA               |
| 3  | NaN TNFSF10,IRF1                    |
| 4  | NaN PLA2G2D,RARRES3                 |
| 5  | NaN CD3E,HSPA6,IL1B,JAK2,CCL5,STAT1 |
| 6  | NaN TLN2,CAPN3                      |
| 7  | NaN PLA2G2D,RARRES3,PDE4B           |
| 8  | NaN JAK2,CCL5,STAT1                 |
| 9  | NaN IDO1                            |
| 10 | NaN PGM5                            |
| 11 | NaN GZMB                            |
| 12 | NaN DNMT1,MAPRE3                    |
| 13 | NaN JAK2,STAT1                      |
| 14 | NaN JAK2,STAT1                      |
| 15 | NaN KPNA2                           |
| 16 | NaN SPN,CXCL12,MMP2,MMP25           |
| 17 | NaN CXCL12,EPHB3                    |
| 18 | NaN ITPKB                           |
| 19 | NaN ITPKB                           |
| 20 | NaN STAT4,STAT1,IRF1                |
| 21 | NaN GZMA                            |
| 22 | NaN RBP7                            |
| 23 | NaN TNFAIP3,TRAF1                   |
| 24 | NaN ACSS1                           |
| 25 | NaN IL15RA,JAK2                     |
| 26 | NaN MXD1                            |
| 27 | NaN JAK2,STAT1                      |
| 28 | NaN AGRP,JAK2                       |
| 29 | NaN STAT1                           |
| 30 | NaN GZMB                            |
| 31 | NaN ITPKB                           |
| 32 | NaN JAK2,STAT1                      |
| 33 | NaN IDO1                            |
| 34 | NaN KCNJ2,KCNJ10,GRIN3A             |
| 35 | 0 RGS1,CAMK2D,RGS16,GRIN3A          |
| 36 | NaN CD3E                            |
| 37 | NaN ME3                             |
| 38 | NaN HSPH1,HSPA6,DNAJB1              |
| 39 | NaN STAT4,STAT1                     |
| 40 | NaN TNFSF10,BIRC3                   |
| 41 | NaN MMP2,MMP25                      |
| 42 | NaN CD3E,CCL5                       |
| 43 | NaN DNMT1,UBD                       |
| 44 | 1 MMP2,JAK2,STAT1,MMP25             |
| 45 | NaN BIRC3,CAPN3                     |
| 46 | NaN JAK2,STAT1                      |
| 47 | NaN JAK2                            |
| 48 |                                     |
| 49 |                                     |
| 50 |                                     |
| 51 |                                     |
| 52 |                                     |
| 53 |                                     |
| 54 |                                     |
| 55 |                                     |
| 56 |                                     |
| 57 |                                     |
| 58 |                                     |
| 59 |                                     |
| 60 |                                     |

<https://jitc.bmj.com>

|    |                                         |
|----|-----------------------------------------|
| 1  |                                         |
| 2  | NaN TLN2,CAPN3                          |
| 3  | NaN NTRK3,TNFAIP3,IL1B                  |
| 4  | NaN GRIN3A                              |
| 5  | NaN RBP7                                |
| 6  | NaN RBP7                                |
| 7  | NaN PLA2G2D                             |
| 8  | NaN NTRK3,CXCL12,EPHB3,MMP2,ROBO3,RTN4R |
| 9  | NaN JAK2,STAT1,IRF1                     |
| 10 | NaN JAK2,STAT1,IRF1                     |
| 11 | NaN SPN                                 |
| 12 | NaN MMP2,JAK2,mir-34                    |
| 13 | NaN JAK2,IGFBP2                         |
| 14 | NaN JAK2,IGFBP2                         |
| 15 | NaN ACSS1                               |
| 16 | NaN SOD2,DNAJA4,DNAJB1                  |
| 17 | NaN SOD2,DNAJA4,DNAJB1                  |
| 18 | NaN CAMK2D,GRIN3A                       |
| 19 | NaN CD3E,CD8A                           |
| 20 | NaN CD3E,CD8A                           |
| 21 | NaN TAP1                                |
| 22 | NaN TRAF1                               |
| 23 | NaN WARS                                |
| 24 | NaN WARS                                |
| 25 | NaN TLN2,PLA2G2D,STAT1                  |
| 26 | NaN CAMK2D,TNNI2,GRIN3A                 |
| 27 | NaN JAK2,STAT1                          |
| 28 | NaN TRAF1                               |
| 29 | NaN TRAF1                               |
| 30 | NaN CAPN3                               |
| 31 | NaN PDE4B                               |
| 32 | NaN RBP7                                |
| 33 | NaN RBP7                                |
| 34 | NaN MMP2,MMP25                          |
| 35 | NaN PLA2G2D                             |
| 36 | NaN GCH1                                |
| 37 | NaN GCH1                                |
| 38 | NaN IL1B,HTRA1,SLC39A8                  |
| 39 | NaN CAMK2D,GRIN3A                       |
| 40 | NaN CYP27A1,IL1B                        |
| 41 | NaN CYP27A1,IL1B                        |
| 42 | NaN STAT1                               |
| 43 | NaN HS3ST2                              |
| 44 | NaN IL1B,JAK2                           |
| 45 | NaN GDF15,JAK2                          |
| 46 | NaN GDF15,JAK2                          |
| 47 | NaN GZMB                                |
| 48 | NaN IL1B,JAK2                           |
| 49 | NaN HS3ST2                              |
| 50 | NaN HS3ST2                              |
| 51 | NaN IL1B,CCL5                           |
| 52 | NaN CAPN3                               |
| 53 | NaN IL1B                                |
| 54 | NaN CD3E,CD72,IL1B                      |
| 55 | NaN CD3E,CD72,IL1B                      |
| 56 | NaN ATP6V0D2,TAP1                       |
| 57 | NaN HS3ST2                              |
| 58 | NaN HS3ST2                              |
| 59 | NaN CD3E                                |
| 60 | NaN HS3ST2                              |
|    | NaN STAT1                               |

<https://jitc.bmj.com>

|    |                              |
|----|------------------------------|
| 1  |                              |
| 2  | NaN CYP27A1,IL1B             |
| 3  | NaN CD3E                     |
| 4  | NaN CAMK2D,CD3E              |
| 5  | NaN TRAF1                    |
| 6  | NaN TRAF1                    |
| 7  | NaN STAT1                    |
| 8  | NaN CDC42BPA,CD3E            |
| 9  | NaN CDC42BPA,CD3E            |
| 10 | NaN IL1B                     |
| 11 | NaN CCL5                     |
| 12 | NaN CCL5                     |
| 13 | NaN IL2RA                    |
| 14 | NaN SOD2,LRRK2               |
| 15 | NaN CAMK2D,MMP2              |
| 16 | NaN AQP3,HSPA6               |
| 17 | NaN AQP3,HSPA6               |
| 18 | NaN UBD,SOX13                |
| 19 | NaN CAMK2D                   |
| 20 | NaN CAMK2D                   |
| 21 | NaN JAK2                     |
| 22 | NaN CAMK2D,RGS16,PDE4B       |
| 23 | NaN MMP2                     |
| 24 | NaN MMP2                     |
| 25 | NaN HS3ST2                   |
| 26 | NaN PLA2G2D,RARRES3          |
| 27 | NaN GCH1                     |
| 28 | NaN JAK2                     |
| 29 | NaN JAK2                     |
| 30 | NaN CCL5                     |
| 31 | NaN STAT1                    |
| 32 | NaN IL1B,JAK2                |
| 33 | NaN IL1B,JAK2                |
| 34 | NaN DUSP5,CAMK2D,TNNI2,PDE4B |
| 35 | NaN CAMK2D,HS3ST2,IL1B       |
| 36 | NaN RBP7,JAK2                |
| 37 | NaN RBP7,JAK2                |
| 38 | NaN HS3ST2                   |
| 39 | NaN NTRK3                    |
| 40 | NaN TRAF1                    |
| 41 | NaN TRAF1                    |
| 42 | NaN GZMB                     |
| 43 | NaN CD3E                     |
| 44 | NaN PLA2G2D,RARRES3          |
| 45 | NaN PLA2G2D,RARRES3          |
| 46 | NaN JAK2                     |
| 47 | NaN UBD                      |
| 48 | NaN IL1B,MMP2                |
| 49 | NaN IL1B,MMP2                |
| 50 | NaN IL1B                     |
| 51 | NaN CD3E                     |
| 52 | NaN STAT1                    |
| 53 | NaN MMP2,CSTB                |
| 54 | NaN MMP2,CSTB                |
| 55 | NaN TLN2                     |
| 56 | NaN SOD2                     |
| 57 | NaN SOD2                     |
| 58 | NaN MMP2                     |
| 59 | NaN PLA2G2D                  |
| 60 | NaN JAK2                     |
|    | NaN CDA                      |

<https://jitc.bmj.com>

|    |                       |
|----|-----------------------|
| 1  |                       |
| 2  | NaN IL1B              |
| 3  | NaN PLA2G2D           |
| 4  | NaN TLN2              |
| 5  | NaN IL1B              |
| 6  | NaN IL1B              |
| 7  | NaN DNM1,UBD          |
| 8  | NaN CD3E              |
| 9  | NaN CXCL12            |
| 10 | NaN PLA2G2D           |
| 11 | NaN CD3E              |
| 12 | NaN DNM1              |
| 13 | NaN PDE4B             |
| 14 | NaN PDE4B             |
| 15 | NaN CAMK2D            |
| 16 | NaN CAMK2D,JAK2,BIRC3 |
| 17 | NaN IL1B              |
| 18 | NaN IL1B              |
| 19 | NaN NTRK3             |
| 20 | NaN DNAJB1            |
| 21 | NaN JAK2              |
| 22 | NaN CAMK2D            |
| 23 | NaN CAMK2D            |
| 24 | NaN WARS              |
| 25 | NaN EPHB3             |
| 26 | NaN UBD               |
| 27 | NaN IL1B,BIRC3        |
| 28 | NaN CD3E,PLA2G2D      |
| 29 | NaN MMP2              |
| 30 | NaN CAMK2D            |
| 31 | NaN CAMK2D            |
| 32 | NaN BIRC3             |
| 33 | NaN CAMK2D            |
| 34 | NaN TLN2              |
| 35 | NaN IL2RA             |
| 36 | NaN JAK2              |
| 37 | NaN DUSP5             |
| 38 | NaN DUSP5             |
| 39 | NaN DUSP5,ITPKB       |
| 40 | NaN DUSP5             |
| 41 | NaN DUSP5             |
| 42 | NaN DUSP5             |
| 43 | NaN RGS16             |
| 44 | NaN STAT1             |
| 45 | NaN FABP4             |
| 46 | NaN NTRK3             |
| 47 | NaN PDE4B             |
| 48 |                       |
| 49 |                       |
| 50 |                       |
| 51 |                       |
| 52 |                       |
| 53 |                       |
| 54 |                       |
| 55 |                       |
| 56 |                       |
| 57 |                       |
| 58 |                       |
| 59 |                       |
| 60 |                       |

<https://jitc.bmj.com>

|    |                  |
|----|------------------|
| 1  |                  |
| 2  | NaN CAMK2D       |
| 3  | NaN JAK2         |
| 4  | NaN TLN2,CAPN3   |
| 5  | NaN CAMK2D,PDE4B |
| 6  | NaN PDE4B        |
| 7  | NaN SOD2         |
| 8  |                  |
| 9  |                  |
| 10 |                  |
| 11 |                  |
| 12 |                  |
| 13 |                  |
| 14 |                  |
| 15 |                  |
| 16 |                  |
| 17 |                  |
| 18 |                  |
| 19 |                  |
| 20 |                  |
| 21 |                  |
| 22 |                  |
| 23 |                  |
| 24 |                  |
| 25 |                  |
| 26 |                  |
| 27 |                  |
| 28 |                  |
| 29 |                  |
| 30 |                  |
| 31 |                  |
| 32 |                  |
| 33 |                  |
| 34 |                  |
| 35 |                  |
| 36 |                  |
| 37 |                  |
| 38 |                  |
| 39 |                  |
| 40 |                  |
| 41 |                  |
| 42 |                  |
| 43 |                  |
| 44 |                  |
| 45 |                  |
| 46 |                  |
| 47 |                  |
| 48 |                  |
| 49 |                  |
| 50 |                  |
| 51 |                  |
| 52 |                  |
| 53 |                  |
| 54 |                  |
| 55 |                  |
| 56 |                  |
| 57 |                  |
| 58 |                  |
| 59 |                  |
| 60 |                  |

Confidential: For Review Only



|    | <b>M1 geneset</b> | <b>M2 geneset</b> |
|----|-------------------|-------------------|
| 1  |                   |                   |
| 2  |                   |                   |
| 3  | AATF              | ADAM15            |
| 4  | ADAR              | ADAM28            |
| 5  | AIM2              | ADORA3            |
| 6  | ALPK1             | ALDH5A1           |
| 7  | ANKRD22           | ALOX15            |
| 8  | APOBEC3A          | ALOX5AP           |
| 9  | APOL2             | ARG1              |
| 10 | APOL3             | ARG2              |
| 11 | APOL6             | ARHGAP23          |
| 12 | ARS2              | ATG7              |
| 13 | BATF2             | AUH               |
| 14 | BTN3A1            | BAP1              |
| 15 | BTN3A2            | BATF3             |
| 16 | BTN3A3            | BCL3              |
| 17 | C6ORF106          | C3AR1             |
| 18 | C9ORF109          | C5AR1             |
| 19 | CCL15             | CABIN1            |
| 20 | CCL20             | CARD9             |
| 21 | CCL5              | CBR3              |
| 22 | CD40              | CCDC6             |
| 23 | CD69              | CCL17             |
| 24 | CFB               | CCL18             |
| 25 | CLDN7             | CCL22             |
| 26 | CXCL10            | CCL26             |
| 27 | CXCL11            | CCRN4L            |
| 28 | CXCL12            | CD14              |
| 29 | CXCL9             | CD163             |
| 30 | DCAF6             | CD206             |
| 31 | DYNLT1            | CD209             |
| 32 | ELF4              | CLIC2             |
| 33 | ETV7              | CRH               |
| 34 | FAM26F            | CTNNAL1           |
| 35 | GBP1              | CXORF40A          |
| 36 | GBP2              | CYBB              |
| 37 | GBP4              | DAAM1             |
| 38 | GBP5              | DAP               |
| 39 | HAPLN3            | DHRS11            |
| 40 | HCG4              | DLST              |
| 41 | HCP5              | DUSP6             |
| 42 | HLA-A             | EGLN3             |
| 43 | HLA-B             | ESPNL             |
| 44 | HLA-C             | EXOC2             |
| 45 | HLA-E             | FOS               |
| 46 | HLA-F             | FOXD2             |
| 47 | HLA-G             | FOXQ1             |
| 48 |                   |                   |
| 49 |                   |                   |
| 50 |                   |                   |
| 51 |                   |                   |
| 52 |                   |                   |
| 53 |                   |                   |
| 54 |                   |                   |
| 55 |                   |                   |
| 56 |                   |                   |
| 57 |                   |                   |
| 58 |                   |                   |
| 59 |                   |                   |
| 60 |                   |                   |

<https://jitc.bmj.com>

|    |           |           |
|----|-----------|-----------|
| 1  |           |           |
| 2  | HLA-H     | GALNT12   |
| 3  | IL1F7     | GALNTL4   |
| 4  | IL11      | GLS       |
| 5  | IL12A     | GOLGA8B   |
| 6  | IL12B     | GPD1L     |
| 7  | IL23A     | GPR65     |
| 8  | IL27      | HARS2     |
| 9  | IL6       | HEMK1     |
| 10 | IRF1      | HOMER2    |
| 11 | IRF5      | HPS1      |
| 12 | IRF7      | IL10      |
| 13 | IRF9      | IL10RA    |
| 14 | ITGAL     | IL10RB    |
| 15 | JAK2      | IL13RA1   |
| 16 | KCNJ2     | IL17RB    |
| 17 | LBA1      | IL1R1     |
| 18 | LOC400759 | IL1R2     |
| 19 | LRRCC1    | IL4I1     |
| 20 | MDK       | IL4R      |
| 21 | MFAP1     | INTS3     |
| 22 | MIA3      | IRF4      |
| 23 | MOV10     | ISYNA1    |
| 24 | MR1       | ITPRIPL1  |
| 25 | NFIX      | KIAA0182  |
| 26 | NLRC5     | KIAA1671  |
| 27 | NMI       | KTN1      |
| 28 | NOS2      | LOC284998 |
| 29 | NUP50     | LOC152195 |
| 30 | OAT       | LYZ       |
| 31 | ORC3L     | MACF1     |
| 32 | OSCAR     | MAOA      |
| 33 | PARP14    | MAP1A     |
| 34 | PAXIP1    | MLKL      |
| 35 | PLEKHA7   | MMP1      |
| 36 | PML       | MMP12     |
| 37 | PRPF3     | MMP7      |
| 38 | PSMB10    | MMP9      |
| 39 | PSMB8     | MUTED     |
| 40 | PSMB9     | NAGPA     |
| 41 | RARRES3   | NLRP12    |
| 42 | RBCK1     | NMD3      |
| 43 | SELT      | PALLD     |
| 44 | SERPING1  | PELP1     |
| 45 | SERPINI1  | PITPNA    |
| 46 | SLAMF7    | PITRM1    |
| 47 | SLC15A4   | PPP1R14A  |
| 48 |           |           |
| 49 |           |           |
| 50 |           |           |
| 51 |           |           |
| 52 |           |           |
| 53 |           |           |
| 54 |           |           |
| 55 |           |           |
| 56 |           |           |
| 57 |           |           |
| 58 |           |           |
| 59 |           |           |
| 60 |           |           |

<https://jitc.bmj.com>

|    |         |         |
|----|---------|---------|
| 1  |         |         |
| 2  | SLC6A12 | PPP1R3B |
| 3  | SP100   | RAB33A  |
| 4  | SP140   | RAB40B  |
| 5  | STAT1   | RAMP1   |
| 6  | STAT2   | RAP1GAP |
| 7  | TAP1    | RASL10A |
| 8  | TAP2    | RASSF7  |
| 9  | TIFA    | RPL28   |
| 10 | TLR2    | RRP1B   |
| 11 | TLR4    | RTKN    |
| 12 | TM9SF2  | S100A8  |
| 13 | TM9SF3  | S100A9  |
| 14 | TMEM140 | SNX8    |
| 15 | TNF     | SOCS1   |
| 16 | TNFSF10 | SOCS3   |
| 17 | TRAFD1  | SOX8    |
| 18 | TUT1    | STAB1   |
| 19 | UBD     | STAT6   |
| 20 | UBE2L6  | SUCNR1  |
| 21 | USP9X   | SULF2   |
| 22 | VAMP5   | SYT17   |
| 23 | VPS36   | TGFBI   |
| 24 | WARS    | TIGD5   |
| 25 | ZDHHC8  | TOR3A   |
| 26 | ZNF668  | TRIB2   |
| 27 |         | TTC9C   |
| 28 |         | UST     |
| 29 |         | WDR33   |
| 30 |         | WNT5A   |
| 31 |         | WNT5B   |
| 32 |         | ZNF317  |
| 33 |         |         |
| 34 |         |         |
| 35 |         |         |
| 36 |         |         |
| 37 |         |         |
| 38 |         |         |
| 39 |         |         |
| 40 |         |         |
| 41 |         |         |
| 42 |         |         |
| 43 |         |         |
| 44 |         |         |
| 45 |         |         |
| 46 |         |         |
| 47 |         |         |
| 48 |         |         |
| 49 |         |         |
| 50 |         |         |
| 51 |         |         |
| 52 |         |         |
| 53 |         |         |
| 54 |         |         |
| 55 |         |         |
| 56 |         |         |
| 57 |         |         |
| 58 |         |         |
| 59 |         |         |
| 60 |         |         |

**Supplementary Table 6: Data of overall survival in a NSCLC adenocar**

| Anonimized ID | Gender | Age | Dead/Alive |
|---------------|--------|-----|------------|
| LUAD-2007-001 | M      | 51  | 1          |
| LUAD-2007-002 | F      | 69  | 1          |
| LUAD-2007-003 | M      | 42  | 1          |
| LUAD-2007-004 | M      | 89  | 1          |
| LUAD-2007-005 | F      | 56  | 1          |
| LUAD-2007-006 | F      | 73  | 1          |
| LUAD-2007-007 | M      | 74  | 0          |
| LUAD-2007-008 | M      | 73  | 1          |
| LUAD-2007-009 | M      | 66  | 0          |
| LUAD-2007-010 | F      | 71  | 1          |
| LUAD-2007-011 | M      | 59  | NA         |
| LUAD-2007-012 | M      | 53  | 1          |
| LUAD-2007-013 | M      | 77  | 1          |
| LUAD-2007-014 | F      | 60  | 1          |
| LUAD-2007-015 | F      | 76  | 0          |
| LUAD-2007-016 | M      | 61  | 1          |
| LUAD-2007-017 | M      | 71  | 1          |
| LUAD-2007-018 | M      | 52  | 0          |
| LUAD-2007-019 | F      | 74  | 1          |
| LUAD-2007-020 | M      | 65  | 1          |
| LUAD-2007-021 | M      | 50  | 1          |
| LUAD-2007-022 | F      | 67  | 1          |
| LUAD-2007-023 | F      | 74  | 1          |
| LUAD-2007-024 | M      | 72  | 1          |
| LUAD-2007-025 | M      | 74  | 1          |
| LUAD-2007-026 | M      | 63  | 1          |
| LUAD-2007-027 | F      | 79  | 0          |
| LUAD-2007-028 | F      | 66  | 0          |
| LUAD-2007-029 | M      | 61  | 0          |
| LUAD-2007-030 | M      | 65  | 0          |
| LUAD-2007-031 | M      | 38  | 0          |
| LUAD-2007-033 | M      | 83  | 1          |
| LUAD-2007-034 | F      | 67  | 1          |
| LUAD-2007-035 | F      | 53  | 1          |
| LUAD-2007-036 | F      | 63  | 0          |
| LUAD-2007-037 | M      | 71  | 1          |
| LUAD-2007-038 | M      | 76  | 1          |
| LUAD-2007-039 | M      | 79  | 1          |
| LUAD-2007-040 | M      | 80  | 1          |
| LUAD-2007-041 | F      | 67  | 0          |
| LUAD-2007-042 | M      | 71  | 0          |
| LUAD-2007-044 | M      | 74  | 1          |
| LUAD-2007-045 | M      | 63  | 1          |
| LUAD-2007-046 | F      | 47  | 1          |
| LUAD-2007-047 | F      | 64  | 1          |
| LUAD-2007-048 | M      | 64  | 1          |

<https://jitc.bmj.com>

|    |               |   |    |    |
|----|---------------|---|----|----|
| 1  |               |   |    |    |
| 2  | LUAD-2007-049 | F | 66 | 1  |
| 3  | LUAD-2007-050 | F | 62 | 0  |
| 4  | LUAD-2007-051 | F | 76 | 1  |
| 5  | LUAD-2007-052 | M | 70 | 1  |
| 6  | LUAD-2007-053 | M | 69 | 0  |
| 7  | LUAD-2007-054 | M | 68 | 1  |
| 8  | LUAD-2007-055 | M | 61 | 1  |
| 9  | LUAD-2007-056 | M | 43 | 1  |
| 10 | LUAD-2007-057 | M | 71 | NA |
| 11 | LUAD-2007-058 | F | 51 | 1  |
| 12 | LUAD-2007-059 | F | 60 | 0  |
| 13 | LUAD-2007-060 | F | 42 | 1  |
| 14 | LUAD-2008-061 | M | 63 | 1  |
| 15 | LUAD-2008-062 | F | 60 | 1  |
| 16 | LUAD-2008-063 | F | 79 | 1  |
| 17 | LUAD-2008-064 | M | 73 | 1  |
| 18 | LUAD-2008-065 | F | 49 | NA |
| 19 | LUAD-2008-066 | F | 63 | 1  |
| 20 | LUAD-2008-067 | F | 54 | 1  |
| 21 | LUAD-2008-068 | F | 84 | 0  |
| 22 | LUAD-2008-069 | F | 71 | 0  |
| 23 | LUAD-2008-070 | F | 71 | 0  |
| 24 | LUAD-2008-071 | M | 67 | 1  |
| 25 | LUAD-2008-072 | M | 68 | 1  |
| 26 | LUAD-2008-073 | F | 65 | 0  |
| 27 | LUAD-2008-074 | F | 65 | 1  |
| 28 | LUAD-2008-075 | F | 63 | 0  |
| 29 | LUAD-2008-077 | F | 70 | 0  |
| 30 | LUAD-2008-078 | M | 53 | 0  |
| 31 | LUAD-2008-079 | F | 75 | 0  |
| 32 | LUAD-2008-080 | F | 58 | NA |
| 33 | LUAD-2008-081 | M | 47 | 1  |
| 34 | LUAD-2008-082 | F | 81 | 1  |
| 35 | LUAD-2008-083 | F | 71 | 1  |
| 36 | LUAD-2008-084 | M | 55 | 1  |
| 37 | LUAD-2008-085 | F | 82 | 1  |
| 38 | LUAD-2008-086 | F | 70 | 1  |
| 39 | LUAD-2008-087 | M | 67 | 1  |
| 40 | LUAD-2008-088 | M | 58 | 1  |
| 41 | LUAD-2008-089 | M | 74 | 1  |
| 42 | LUAD-2008-090 | F | 62 | 0  |
| 43 | LUAD-2008-091 | F | 69 | 0  |
| 44 | LUAD-2008-092 | M | 72 | 1  |
| 45 | LUAD-2008-093 | F | 63 | 1  |
| 46 | LUAD-2008-094 | M | 76 | 1  |
| 47 | LUAD-2008-095 | F | 79 | 1  |
| 48 | LUAD-2008-096 | F | 69 | 0  |
| 49 | LUAD-2008-097 | F | 71 | 0  |
| 50 | LUAD-2008-098 | M | 51 | 1  |

<https://jitc.bmj.com>

|    |               |   |    |   |
|----|---------------|---|----|---|
| 1  |               |   |    |   |
| 2  | LUAD-2008-099 | F | 54 | 0 |
| 3  | LUAD-2008-101 | M | 73 | 1 |
| 4  | LUAD-2008-102 | M | 75 | 0 |
| 5  | LUAD-2008-103 | M | 58 | 1 |
| 6  | LUAD-2008-104 | M | 71 | 1 |
| 7  | LUAD-2008-105 | F | 76 | 1 |
| 8  | LUAD-2008-106 | M | 81 | 1 |
| 9  | LUAD-2008-107 | F | 64 | 0 |
| 10 | LUAD-2008-108 | F | 77 | 1 |
| 11 | LUAD-2008-109 | M | 59 | 0 |
| 12 | LUAD-2008-110 | F | 55 | 1 |
| 13 | LUAD-2008-111 | F | 75 | 0 |
| 14 | LUAD-2008-112 | F | 69 | 0 |
| 15 | LUAD-2008-113 | M | 73 | 1 |
| 16 | LUAD-2008-114 | F | 67 | 1 |
| 17 | LUAD-2008-116 | M | 63 | 1 |
| 18 | LUAD-2008-117 | F | 49 | 0 |
| 19 | LUAD-2008-118 | F | 67 | 0 |
| 20 | LUAD-2008-119 | F | 73 | 0 |
| 21 | LUAD-2008-120 | M | 62 | 1 |
| 22 | LUAD-2008-121 | F | 79 | 1 |
| 23 | LUAD-2008-122 | F | 67 | 0 |
| 24 | LUAD-2008-123 | F | 70 | 0 |
| 25 | LUAD-2008-124 | M | 72 | 0 |
| 26 | LUAD-2008-125 | M | 61 | 1 |
| 27 | LUAD-2008-126 | M | 72 | 1 |
| 28 | LUAD-2008-127 | F | 64 | 1 |
| 29 | LUAD-2008-128 | M | 83 | 1 |
| 30 | LUAD-2008-129 | F | 63 | 1 |
| 31 | LUAD-2008-130 | F | 58 | 0 |
| 32 | LUAD-2008-131 | M | 73 | 1 |
| 33 | LUAD-2008-132 | M | 78 | 1 |
| 34 | LUAD-2008-133 | F | 58 | 0 |
| 35 | LUAD-2008-134 | M | 44 | 1 |
| 36 | LUAD-2008-135 | M | 70 | 0 |
| 37 | LUAD-2008-136 | M | 78 | 1 |
| 38 | LUAD-2008-137 | F | 76 | 1 |
| 39 | LUAD-2008-138 | F | 59 | 1 |
| 40 | LUAD-2008-139 | F | 75 | 0 |
| 41 | LUAD-2008-140 | M | 69 | 1 |
| 42 | LUAD-2008-141 | M | 61 | 1 |
| 43 | LUAD-2008-143 | F | 76 | 1 |
| 44 | LUAD-2009-144 | M | 70 | 1 |
| 45 | LUAD-2009-145 | M | 63 | 0 |
| 46 | LUAD-2009-146 | F | 51 | 0 |
| 47 | LUAD-2009-147 | M | 59 | 1 |
| 48 | LUAD-2009-148 | M | 56 | 1 |
| 49 | LUAD-2009-149 | F | 58 | 0 |
| 50 | LUAD-2009-150 | F | 61 | 1 |
| 51 |               |   |    |   |
| 52 |               |   |    |   |
| 53 |               |   |    |   |
| 54 |               |   |    |   |
| 55 |               |   |    |   |
| 56 |               |   |    |   |
| 57 |               |   |    |   |
| 58 |               |   |    |   |
| 59 |               |   |    |   |
| 60 |               |   |    |   |

<https://jitc.bmj.com>

|    |               |   |    |   |
|----|---------------|---|----|---|
| 1  |               |   |    |   |
| 2  | LUAD-2009-151 | M | 72 | 1 |
| 3  | LUAD-2009-152 | F | 72 | 1 |
| 4  | LUAD-2009-153 | F | 60 | 0 |
| 5  | LUAD-2009-154 | F | 54 | 1 |
| 6  | LUAD-2009-155 | M | 88 | 1 |
| 7  | LUAD-2009-156 | M | 54 | 1 |
| 8  | LUAD-2009-157 | F | 46 | 0 |
| 9  | LUAD-2009-159 | M | 57 | 0 |
| 10 | LUAD-2009-160 | F | 59 | 1 |
| 11 | LUAD-2009-161 | M | 51 | 0 |
| 12 | LUAD-2009-162 | F | 60 | 0 |
| 13 | LUAD-2009-163 | F | 63 | 0 |
| 14 | LUAD-2009-164 | M | 84 | 1 |
| 15 | LUAD-2009-165 | F | 60 | 0 |
| 16 | LUAD-2009-166 | M | 62 | 0 |
| 17 | LUAD-2009-167 | M | 72 | 0 |
| 18 | LUAD-2009-168 | F | 81 | 1 |
| 19 | LUAD-2009-169 | M | 81 | 1 |
| 20 | LUAD-2009-171 | M | 76 | 1 |
| 21 | LUAD-2009-172 | M | 73 | 0 |
| 22 | LUAD-2009-173 | F | 68 | 0 |
| 23 | LUAD-2009-174 | M | 66 | 0 |
| 24 | LUAD-2009-175 | M | 56 | 0 |
| 25 | LUAD-2009-176 | M | 64 | 1 |
| 26 | LUAD-2009-177 | F | 62 | 0 |
| 27 | LUAD-2009-178 | M | 69 | 1 |
| 28 | LUAD-2009-179 | M | 77 | 0 |
| 29 | LUAD-2009-180 | M | 61 | 0 |
| 30 | LUAD-2009-182 | F | 70 | 1 |
| 31 | LUAD-2009-183 | M | 67 | 1 |
| 32 | LUAD-2009-184 | M | 81 | 1 |
| 33 | LUAD-2009-185 | M | 71 | 1 |
| 34 | LUAD-2009-186 | M | 68 | 0 |
| 35 | LUAD-2009-187 | F | 67 | 1 |
| 36 | LUAD-2009-188 | M | 76 | 0 |
| 37 | LUAD-2009-189 | F | 83 | 0 |
| 38 | LUAD-2009-190 | M | 82 | 1 |
| 39 | LUAD-2009-191 | F | 62 | 0 |
| 40 | LUAD-2009-192 | M | 80 | 1 |
| 41 | LUAD-2009-193 | M | 65 | 1 |
| 42 | LUAD-2009-194 | F | 69 | 1 |
| 43 | LUAD-2009-195 | F | 55 | 0 |
| 44 | LUAD-2009-196 | F | 55 | 0 |
| 45 | LUAD-2009-197 | F | 65 | 1 |
| 46 | LUAD-2009-198 | M | 61 | 0 |
| 47 | LUAD-2009-200 | F | 84 | 0 |
| 48 | LUAD-2009-201 | F | 88 | 1 |
| 49 | LUAD-2009-202 | F | 60 | 0 |
| 50 | LUAD-2009-203 | M | 71 | 0 |

<https://jitc.bmj.com>

|    |               |    |    |    |
|----|---------------|----|----|----|
| 1  |               |    |    |    |
| 2  | LUAD-2009-204 | M  | 71 | 0  |
| 3  | LUAD-2009-205 | F  | 70 | 0  |
| 4  | LUAD-2009-206 | F  | 58 | 0  |
| 5  | LUAD-2009-207 | F  | 83 | 0  |
| 6  | LUAD-2009-208 | M  | 70 | 1  |
| 7  | LUAD-2009-209 | M  | 61 | 1  |
| 8  | LUAD-2009-210 | F  | 74 | 1  |
| 9  | LUAD-2009-211 | M  | 72 | 1  |
| 10 | LUAD-2009-212 | M  | 77 | 1  |
| 11 | LUAD-2009-213 | M  | 66 | 1  |
| 12 | LUAD-2009-214 | F  | 66 | 1  |
| 13 | LUAD-2009-215 | M  | 71 | 1  |
| 14 | LUAD-2009-217 | F  | 78 | 1  |
| 15 | LUAD-2009-218 | M  | 77 | 1  |
| 16 | LUAD-2009-219 | F  | 78 | 0  |
| 17 | LUAD-2009-220 | F  | 61 | 1  |
| 18 | LUAD-2009-221 | F  | 66 | 1  |
| 19 | LUAD-2009-222 | M  | 67 | 1  |
| 20 | LUAD-2009-223 | F  | 70 | 1  |
| 21 | LUAD-2009-224 | M  | 63 | 1  |
| 22 | LUAD-2009-225 | M  | 57 | 1  |
| 23 | LUAD-2009-226 | M  | 56 | 1  |
| 24 | LUAD-2009-227 | M  | 75 | 0  |
| 25 | LUAD-2009-229 | F  | 63 | 1  |
| 26 | LUAD-2009-230 | F  | 61 | NA |
| 27 | LUAD-2009-231 | F  | 59 | 0  |
| 28 | LUAD-2009-232 | F  | 59 | 1  |
| 29 | LUAD-2009-233 | M  | 73 | NA |
| 30 | LUAD-2009-234 | M  | 66 | 1  |
| 31 | LUAD-2009-235 | NA | NA | NA |
| 32 | LUAD-2010-236 | F  | 74 | 1  |
| 33 | LUAD-2010-237 | M  | 55 | 0  |
| 34 | LUAD-2010-238 | M  | 65 | 0  |
| 35 | LUAD-2010-239 | M  | 76 | 0  |
| 36 | LUAD-2010-240 | F  | 78 | 0  |
| 37 | LUAD-2010-241 | M  | 79 | 0  |
| 38 | LUAD-2010-242 | M  | 72 | 0  |
| 39 | LUAD-2010-243 | F  | 45 | 1  |
| 40 | LUAD-2010-245 | F  | 69 | 1  |
| 41 | LUAD-2010-246 | M  | 67 | 0  |
| 42 | LUAD-2010-247 | M  | 68 | 0  |
| 43 | LUAD-2010-248 | M  | 60 | 1  |
| 44 | LUAD-2010-249 | M  | 75 | 0  |
| 45 | LUAD-2010-250 | F  | 71 | 0  |
| 46 | LUAD-2010-251 | F  | 69 | 1  |
| 47 | LUAD-2010-252 | M  | 72 | 1  |
| 48 | LUAD-2010-253 | F  | 85 | 1  |
| 49 | LUAD-2010-254 | F  | 75 | 0  |
| 50 | LUAD-2010-255 | F  | 61 | 1  |

<https://jitc.bmj.com>



|    |               |   |    |    |
|----|---------------|---|----|----|
| 1  |               |   |    |    |
| 2  | LUAD-2010-256 | M | 60 | 1  |
| 3  | LUAD-2010-257 | M | 65 | 1  |
| 4  | LUAD-2010-258 | F | 78 | 0  |
| 5  | LUAD-2010-259 | F | 55 | 1  |
| 6  | LUAD-2010-260 | F | 77 | 0  |
| 7  | LUAD-2010-261 | F | 52 | 0  |
| 8  | LUAD-2010-262 | F | 67 | 0  |
| 9  | LUAD-2010-263 | F | 66 | 0  |
| 10 | LUAD-2010-264 | M | 79 | 0  |
| 11 | LUAD-2010-265 | F | 62 | 0  |
| 12 | LUAD-2010-266 | F | 67 | 1  |
| 13 | LUAD-2010-267 | F | 56 | 1  |
| 14 | LUAD-2010-268 | M | 75 | 1  |
| 15 | LUAD-2010-269 | M | 67 | 1  |
| 16 | LUAD-2010-270 | M | 65 | 1  |
| 17 | LUAD-2010-271 | M | 79 | 0  |
| 18 | LUAD-2010-272 | M | 75 | 0  |
| 19 | LUAD-2010-273 | M | 68 | 0  |
| 20 | LUAD-2010-274 | F | 81 | 1  |
| 21 | LUAD-2010-275 | F | 77 | 0  |
| 22 | LUAD-2010-276 | M | 60 | 1  |
| 23 | LUAD-2010-277 | F | 70 | 0  |
| 24 | LUAD-2010-278 | F | 78 | 1  |
| 25 | LUAD-2010-279 | F | 78 | 0  |
| 26 | LUAD-2010-280 | F | 80 | 0  |
| 27 | LUAD-2010-282 | F | 73 | 0  |
| 28 | LUAD-2010-283 | F | 64 | 1  |
| 29 | LUAD-2010-284 | M | 67 | 1  |
| 30 | LUAD-2010-285 | M | 65 | 1  |
| 31 | LUAD-2010-286 | F | 71 | 0  |
| 32 | LUAD-2010-287 | M | 57 | 1  |
| 33 | LUAD-2010-288 | M | 62 | 0  |
| 34 | LUAD-2010-289 | F | 83 | 0  |
| 35 | LUAD-2010-290 | F | 70 | 0  |
| 36 | LUAD-2010-291 | F | 63 | 1  |
| 37 | LUAD-2010-292 | F | 64 | 1  |
| 38 | LUAD-2010-293 | F | 69 | 0  |
| 39 | LUAD-2010-294 | M | 73 | 1  |
| 40 | LUAD-2010-295 | F | 56 | 0  |
| 41 | LUAD-2010-296 | F | 81 | 0  |
| 42 | LUAD-2010-297 | M | 59 | 0  |
| 43 | LUAD-2010-299 | M | 75 | NA |
| 44 | LUAD-2010-300 | F | 70 | 1  |
| 45 | LUAD-2010-301 | M | 59 | 0  |
| 46 | LUAD-2010-302 | F | 70 | 0  |
| 47 | LUAD-2010-303 | M | 51 | 1  |
| 48 | LUAD-2010-304 | M | 69 | 1  |
| 49 | LUAD-2010-305 | M | 74 | 0  |
| 50 | LUAD-2010-306 | M | 61 | 0  |

<https://jitc.bmj.com>

|    |               |   |    |    |
|----|---------------|---|----|----|
| 1  |               |   |    |    |
| 2  | LUAD-2010-307 | F | 70 | 0  |
| 3  | LUAD-2010-308 | F | 78 | 1  |
| 4  | LUAD-2010-310 | F | 67 | 0  |
| 5  | LUAD-2010-312 | M | 73 | 1  |
| 6  | LUAD-2010-313 | M | 54 | 0  |
| 7  | LUAD-2010-314 | M | 76 | 1  |
| 8  | LUAD-2010-315 | F | 64 | 0  |
| 9  | LUAD-2010-316 | F | 64 | 0  |
| 10 | LUAD-2010-317 | M | 63 | 0  |
| 11 | LUAD-2010-318 | M | 60 | 0  |
| 12 | LUAD-2010-319 | M | 72 | 0  |
| 13 | LUAD-2010-320 | M | 61 | 1  |
| 14 | LUAD-2010-321 | F | 58 | 0  |
| 15 | LUAD-2010-322 | F | 71 | 0  |
| 16 | LUAD-2010-323 | M | 54 | 1  |
| 17 | LUAD-2010-325 | M | 51 | 1  |
| 18 | LUAD-2010-326 | M | 79 | 1  |
| 19 | LUAD-2010-327 | M | 76 | 1  |
| 20 | LUAD-2010-328 | M | 64 | 1  |
| 21 | LUAD-2010-329 | M | 60 | 0  |
| 22 | LUAD-2010-330 | M | 59 | 1  |
| 23 | LUAD-2010-331 | M | 56 | 0  |
| 24 | LUAD-2010-332 | M | 67 | 0  |
| 25 | LUAD-2010-333 | F | 66 | 0  |
| 26 | LUAD-2010-334 | F | 72 | 1  |
| 27 | LUAD-2010-335 | F | 63 | 1  |
| 28 | LUAD-2010-336 | F | 56 | 1  |
| 29 | LUAD-2010-337 | F | 66 | 1  |
| 30 | LUAD-2010-338 | M | 49 | 0  |
| 31 | LUAD-2010-339 | F | 79 | 1  |
| 32 | LUAD-2010-340 | F | 66 | 0  |
| 33 | LUAD-2010-341 | M | 63 | 0  |
| 34 | LUAD-2010-342 | M | 65 | 1  |
| 35 | LUAD-2010-343 | M | 71 | 0  |
| 36 | LUAD-2011-344 | M | 76 | 0  |
| 37 | LUAD-2011-345 | F | 63 | NA |
| 38 | LUAD-2011-347 | M | 63 | 1  |
| 39 | LUAD-2011-348 | F | 51 | 1  |
| 40 | LUAD-2011-349 | M | 72 | 1  |
| 41 | LUAD-2011-350 | F | 72 | 0  |
| 42 | LUAD-2011-351 | F | 56 | 1  |
| 43 | LUAD-2011-352 | F | 45 | 1  |
| 44 | LUAD-2011-353 | M | 63 | 1  |
| 45 | LUAD-2011-354 | F | 50 | 0  |
| 46 | LUAD-2011-355 | F | 79 | 1  |
| 47 | LUAD-2011-356 | F | 73 | 1  |
| 48 | LUAD-2011-357 | M | 72 | 1  |
| 49 | LUAD-2011-360 | F | 63 | 1  |
| 50 | LUAD-2011-361 | M | 68 | 0  |

<https://jitc.bmj.com>

|    |               |   |    |    |
|----|---------------|---|----|----|
| 1  |               |   |    |    |
| 2  | LUAD-2011-362 | M | 68 | 0  |
| 3  | LUAD-2011-363 | F | 64 | 0  |
| 4  | LUAD-2011-364 | M | 68 | 0  |
| 5  | LUAD-2011-365 | F | 69 | 1  |
| 6  | LUAD-2011-366 | F | 61 | 1  |
| 7  | LUAD-2011-367 | M | 66 | 1  |
| 8  | LUAD-2011-368 | M | 50 | 0  |
| 9  | LUAD-2011-369 | M | 60 | 0  |
| 10 |               |   |    |    |
| 11 | LUAD-2011-370 | M | 68 | NA |
| 12 | LUAD-2011-371 | M | 62 | 0  |
| 13 | LUAD-2011-372 | M | 76 | 0  |
| 14 | LUAD-2011-373 | F | 54 | 0  |
| 15 | LUAD-2011-374 | F | 68 | 1  |
| 16 | LUAD-2011-375 | F | 74 | 0  |
| 17 | LUAD-2011-376 | M | 69 | 0  |
| 18 | LUAD-2011-377 | F | 71 | 0  |
| 19 | LUAD-2011-378 | F | 70 | 0  |
| 20 | LUAD-2011-379 | F | 49 | 1  |
| 21 | LUAD-2011-380 | M | 80 | 0  |
| 22 | LUAD-2011-381 | F | 68 | 0  |
| 23 | LUAD-2011-382 | F | 71 | 1  |
| 24 | LUAD-2011-383 | M | 50 | 0  |
| 25 | LUAD-2011-384 | F | 57 | 1  |
| 26 | LUAD-2011-385 | M | 57 | 0  |
| 27 | LUAD-2011-386 | M | 54 | 1  |
| 28 | LUAD-2011-387 | M | 73 | NA |
| 29 | LUAD-2011-388 | M | 92 | 1  |
| 30 | LUAD-2011-389 | M | 52 | 0  |
| 31 | LUAD-2011-390 | F | 63 | 1  |
| 32 | LUAD-2011-391 | F | 65 | 0  |
| 33 | LUAD-2011-392 | F | 74 | NA |
| 34 | LUAD-2011-393 | M | 54 | 1  |
| 35 | LUAD-2011-394 | M | 75 | 0  |
| 36 | LUAD-2011-396 | F | 77 | 1  |
| 37 | LUAD-2011-397 | M | 69 | 1  |
| 38 | LUAD-2011-398 | M | 65 | 1  |
| 39 | LUAD-2011-399 | F | 66 | 0  |
| 40 | LUAD-2011-400 | F | 73 | 0  |
| 41 | LUAD-2011-401 | F | 72 | 0  |
| 42 | LUAD-2011-402 | M | 81 | 0  |
| 43 | LUAD-2011-403 | M | 56 | 0  |
| 44 | LUAD-2011-404 | M | 72 | 0  |
| 45 | LUAD-2011-405 | F | 68 | 0  |
| 46 | LUAD-2011-406 | F | 59 | 0  |
| 47 | LUAD-2011-407 | M | 62 | 0  |
| 48 | LUAD-2011-408 | F | 79 | NA |
| 49 | LUAD-2011-409 | M | 78 | 1  |
| 50 | LUAD-2011-410 | F | 65 | 1  |
| 51 | LUAD-2011-411 | M | 57 | 0  |

<https://jitc.bmj.com>

1  
2  
3  
4  
5  
6  
7  
8  
9  
10  
11  
12  
13  
14  
15  
16  
17  
18  
19  
20  
21  
22  
23  
24  
25  
26  
27  
28  
29  
30  
31  
32  
33  
34  
35  
36  
37  
38  
39  
40  
41  
42  
43  
44  
45  
46  
47  
48  
49  
50  
51  
52  
53  
54  
55  
56  
57  
58  
59  
60

|               |   |    |   |
|---------------|---|----|---|
| LUAD-2011-412 | F | 69 | 1 |
| LUAD-2011-413 | F | 64 | 1 |
| LUAD-2011-414 | M | 40 | 1 |
| LUAD-2011-415 | F | 62 | 0 |
| LUAD-2011-416 | M | 54 | 1 |
| LUAD-2011-417 | M | 75 | 0 |
| LUAD-2011-418 | M | 78 | 1 |
| LUAD-2011-419 | F | 61 | 0 |
| LUAD-2011-420 | F | 68 | 1 |
| LUAD-2011-421 | M | 70 | 0 |
| LUAD-2011-422 | F | 76 | 0 |
| LUAD-2011-423 | F | 74 | 0 |
| LUAD-2011-425 | M | 76 | 1 |
| LUAD-2011-426 | M | 62 | 0 |
| LUAD-2011-427 | F | 76 | 0 |
| LUAD-2011-428 | F | 70 | 1 |
| LUAD-2011-429 | M | 69 | 0 |
| LUAD-2011-430 | M | 63 | 0 |
| LUAD-2011-432 | F | 51 | 0 |
| LUAD-2011-433 | M | 69 | 0 |
| LUAD-2011-434 | F | 62 | 1 |
| LUAD-2011-435 | F | 64 | 1 |
| LUAD-2011-438 | M | 63 | 1 |
| LUAD-2011-439 | F | 65 | 1 |
| LUAD-2011-440 | M | 62 | 0 |
| LUAD-2011-441 | F | 60 | 0 |
| LUAD-2011-442 | M | 64 | 0 |
| LUAD-2011-444 | M | 64 | 0 |
| LUAD-2011-445 | F | 50 | 0 |
| LUAD-2011-446 | M | 70 | 0 |
| LUAD-2011-447 | F | 62 | 0 |
| LUAD-2011-448 | M | 73 | 0 |
| LUAD-2011-450 | M | 67 | 0 |
| LUAD-2011-451 | M | 74 | 1 |
| LUAD-2011-452 | M | 72 | 0 |
| LUAD-2011-453 | M | 72 | 0 |
| LUAD-2011-454 | F | 56 | 1 |
| LUAD-2011-455 | F | 56 | 0 |
| LUAD-2011-456 | M | 61 | 0 |
| LUAD-2011-457 | F | 64 | 0 |
| LUAD-2011-458 | M | 57 | 1 |
| LUAD-2011-459 | F | 59 | 0 |

1  
2 **Adenocarcinoma (LUAD) retrospective cohort of University of Southampton UoS/Southampton**

3  
4  
5  
6  
7  
8  
9  
10  
11  
12  
13  
14  
15  
16  
17  
18  
19  
20  
21  
22  
23  
24  
25  
26  
27  
28  
29  
30  
31  
32  
33  
34  
35  
36  
37  
38  
39  
40  
41  
42  
43  
44  
45  
46  
47  
48  
49  
50  
51  
52  
53  
54  
55  
56  
57  
58  
59  
60

| Combined survival | CXCL9 score |
|-------------------|-------------|
| 367               | 1           |
| 417               | 2           |
| 342               | 2           |
| 614               | 2           |
| 161               | 2           |
| 996               | 2           |
| 3065              | 2           |
| 511               | 2           |
| 3060              | 2           |
| 263               | 2           |
| 617               | 2           |
| 253               | 2           |
| 1108              | 2           |
| 1153              | 2           |
| 3032              | 2           |
| 710               | 2           |
| 544               | 1           |
| 3018              | 2           |
| 1611              | 2           |
| NA                | 2           |
| 1172              | 1           |
| 1390              | 2           |
| 386               | 3           |
| 36                | 2           |
| 10                | 2           |
| 2111              | 2           |
| 2975              | 2           |
| 2963              | 2           |
| 2960              | 2           |
| 2955              | 1           |
| NA                | 1           |
| 544               | 3           |
| 908               | 2           |
| 1482              | 2           |
| 2934              | 2           |
| 81                | 2           |
| 9                 | 2           |
| 136               | 2           |
| 371               | 2           |
| 2900              | 1           |
| 2897              | 2           |
| 496               | 2           |
| 151               | 2           |
| 390               | 2           |
| 171               | 2           |
| 493               | 2           |

<https://jitc.bmj.com>

|    |      |   |
|----|------|---|
| 1  |      |   |
| 2  | 327  | 2 |
| 3  | 2857 | 3 |
| 4  | 1565 | 1 |
| 5  | 1050 | 2 |
| 6  | 2829 | 2 |
| 7  | 359  | 2 |
| 8  | 1587 | 2 |
| 9  | 2047 | 2 |
| 10 | 750  | 2 |
| 11 | 2164 | 2 |
| 12 | 2764 | 2 |
| 13 | 1441 | 1 |
| 14 | 1    | 2 |
| 15 | 299  | 1 |
| 16 | 473  | 2 |
| 17 | 34   | 2 |
| 18 | 2067 | 2 |
| 19 | 289  | 2 |
| 20 | 355  | 1 |
| 21 | 2715 | 3 |
| 22 | 2711 | 2 |
| 23 | 2703 | 2 |
| 24 | 684  | 1 |
| 25 | 709  | 2 |
| 26 | 2681 | 2 |
| 27 | 1713 | 2 |
| 28 | 2676 | 2 |
| 29 | 2669 | 2 |
| 30 | NA   | 1 |
| 31 | 2667 | 2 |
| 32 | 1589 | 1 |
| 33 | 472  | 2 |
| 34 | 1326 | 2 |
| 35 | 215  | 2 |
| 36 | 522  | 2 |
| 37 | 664  | 2 |
| 38 | 2393 | 3 |
| 39 | 688  | 2 |
| 40 | 394  | 2 |
| 41 | 1818 | 1 |
| 42 | 2571 | 2 |
| 43 | NA   | 2 |
| 44 | 337  | 2 |
| 45 | 1183 | 2 |
| 46 | 1485 | 2 |
| 47 | 206  | 2 |
| 48 | 2536 | 2 |
| 49 | 2535 | 2 |
| 50 | 2090 | 2 |

<https://jitc.bmj.com>

|    |      |   |
|----|------|---|
| 1  |      |   |
| 2  | 2533 | 2 |
| 3  | 2132 | 2 |
| 4  | 2522 | 1 |
| 5  | 1161 | 2 |
| 6  | 1261 | 2 |
| 7  | 1970 | 2 |
| 8  | 895  | 2 |
| 9  | 2500 | 2 |
| 10 | 605  | 3 |
| 11 | 2492 | 2 |
| 12 | 62   | 3 |
| 13 | 2470 | 2 |
| 14 | 2466 | 2 |
| 15 | 730  | 2 |
| 16 | 385  | 2 |
| 17 | 31   | 1 |
| 18 | 2469 | 2 |
| 19 | 2457 | 3 |
| 20 | 2450 | 2 |
| 21 | 569  | 2 |
| 22 | 494  | 2 |
| 23 | 2449 | 3 |
| 24 | 2445 | 2 |
| 25 | NA   | 2 |
| 26 | 2248 | 1 |
| 27 | 209  | 1 |
| 28 | 15   | 1 |
| 29 | 1209 | 2 |
| 30 | 979  | 3 |
| 31 | 2420 | 2 |
| 32 | 144  | 1 |
| 33 | 779  | 2 |
| 34 | 2408 | 2 |
| 35 | 1662 | 3 |
| 36 | 2401 | 2 |
| 37 | 279  | 2 |
| 38 | 288  | 3 |
| 39 | 61   | 1 |
| 40 | 2389 | 2 |
| 41 | 6    | 2 |
| 42 | 35   | 2 |
| 43 | 2139 | 2 |
| 44 | 2026 | 2 |
| 45 | 2364 | 2 |
| 46 | 2360 | 3 |
| 47 | 89   | 2 |
| 48 | 467  | 1 |
| 49 | 2346 | 2 |
| 50 | 411  | 3 |

<https://jitc.bmj.com>

|    |      |   |
|----|------|---|
| 1  |      |   |
| 2  | 51   | 1 |
| 3  | 1386 | 1 |
| 4  | 2322 | 2 |
| 5  | 1187 | 2 |
| 6  | 7    | 2 |
| 7  | 1073 | 2 |
| 8  | 2304 | 2 |
| 9  | 2302 | 3 |
| 10 | 863  | 1 |
| 11 | 2296 | 1 |
| 12 | 2295 | 2 |
| 13 | 2294 | 2 |
| 14 | 1184 | 2 |
| 15 | 2288 | 1 |
| 16 | 2284 | 2 |
| 17 | 2284 | 2 |
| 18 | 814  | 1 |
| 19 | 1441 | 2 |
| 20 | 44   | 2 |
| 21 | 2260 | 2 |
| 22 | 2253 | 2 |
| 23 | NA   | 2 |
| 24 | 2247 | 2 |
| 25 | 398  | 2 |
| 26 | 2234 | 1 |
| 27 | 345  | 2 |
| 28 | 2226 | 2 |
| 29 | 2225 | 2 |
| 30 | 368  | 1 |
| 31 | 1187 | 2 |
| 32 | 1265 | 2 |
| 33 | 96   | 2 |
| 34 | 2210 | 3 |
| 35 | 1409 | 2 |
| 36 | 2185 | 3 |
| 37 | 2184 | 2 |
| 38 | 1656 | 3 |
| 39 | 2170 | 2 |
| 40 | 48   | 1 |
| 41 | 1328 | 1 |
| 42 | 1110 | 2 |
| 43 | 2154 | 2 |
| 44 | 2149 | 2 |
| 45 | 115  | 1 |
| 46 | 2143 | 2 |
| 47 | 2137 | 2 |
| 48 | 1784 | 1 |
| 49 | 2128 | 2 |
| 50 | 2121 | 2 |

<https://jitc.bmj.com>



|    |      |   |
|----|------|---|
| 1  |      |   |
| 2  | 2121 | 2 |
| 3  | NA   | 1 |
| 4  | 2119 | 3 |
| 5  | NA   | 1 |
| 6  | 540  | 2 |
| 7  | 639  | 3 |
| 8  | 287  | 1 |
| 9  | 324  | 3 |
| 10 | 22   | 1 |
| 11 | 1514 | 2 |
| 12 | 50   | 1 |
| 13 | 480  | 1 |
| 14 | 862  | 2 |
| 15 | 146  | 2 |
| 16 | 2074 | 2 |
| 17 | 593  | 3 |
| 18 | 1030 | 3 |
| 19 | 908  | 1 |
| 20 | 1360 | 1 |
| 21 | 547  | 1 |
| 22 | 1598 | 2 |
| 23 | 292  | 2 |
| 24 | 1468 | 2 |
| 25 | 834  | 2 |
| 26 | 35   | 2 |
| 27 | 2035 | 2 |
| 28 | 178  | 1 |
| 29 | 652  | 2 |
| 30 | 1019 | 2 |
| 31 | 0    | 2 |
| 32 | 1763 | 1 |
| 33 | 1990 | 1 |
| 34 | 1990 | 2 |
| 35 | 1987 | 2 |
| 36 | 1986 | 3 |
| 37 | 1982 | 2 |
| 38 | NA   | 1 |
| 39 | 237  | 2 |
| 40 | 402  | 2 |
| 41 | 1946 | 2 |
| 42 | NA   | 2 |
| 43 | 1080 | 1 |
| 44 | NA   | 1 |
| 45 | 1926 | 3 |
| 46 | 911  | 2 |
| 47 | 589  | 2 |
| 48 | 299  | 1 |
| 49 | 1919 | 2 |
| 50 | 285  | 2 |

<https://jitc.bmj.com>

|    |      |   |
|----|------|---|
| 1  |      |   |
| 2  | 814  | 2 |
| 3  | 646  | 1 |
| 4  | NA   | 1 |
| 5  | 494  | 2 |
| 6  | 1909 | 1 |
| 7  | 1905 | 2 |
| 8  | NA   | 2 |
| 9  | 1898 | 3 |
| 10 | 1897 | 3 |
| 11 | 1896 | 1 |
| 12 | 175  | 2 |
| 13 | 290  | 1 |
| 14 | 154  | 2 |
| 15 | 836  | 2 |
| 16 | 752  | 2 |
| 17 | 1874 | 2 |
| 18 | 1871 | 3 |
| 19 | NA   | 1 |
| 20 | 483  | 1 |
| 21 | 1850 | 2 |
| 22 | 1282 | 2 |
| 23 | 1848 | 2 |
| 24 | 1592 | 3 |
| 25 | NA   | 2 |
| 26 | 1836 | 2 |
| 27 | 1833 | 2 |
| 28 | 969  | 2 |
| 29 | 696  | 2 |
| 30 | 788  | 2 |
| 31 | 1819 | 3 |
| 32 | 620  | 2 |
| 33 | 1815 | 3 |
| 34 | 1814 | 2 |
| 35 | NA   | 2 |
| 36 | 691  | 2 |
| 37 | 663  | 2 |
| 38 | 1807 | 2 |
| 39 | 140  | 1 |
| 40 | 1804 | 3 |
| 41 | 1801 | 1 |
| 42 | 1800 | 2 |
| 43 | 38   | 2 |
| 44 | 393  | 1 |
| 45 | NA   | 2 |
| 46 | 1780 | 3 |
| 47 | 785  | 2 |
| 48 | 1650 | 2 |
| 49 | 1777 | 2 |
| 50 | 1771 | 2 |

<https://jitc.bmj.com>

|    |      |   |
|----|------|---|
| 1  |      |   |
| 2  | 1764 | 2 |
| 3  | 1325 | 1 |
| 4  | 1737 | 2 |
| 5  | 149  | 3 |
| 6  | NA   | 3 |
| 7  | 841  | 3 |
| 8  | 1723 | 2 |
| 9  | NA   | 2 |
| 10 | 1720 | 2 |
| 11 | NA   | 1 |
| 12 | 1715 | 3 |
| 13 | 473  | 2 |
| 14 | 1713 | 3 |
| 15 | NA   | 3 |
| 16 | 996  | 2 |
| 17 | 630  | 1 |
| 18 | 489  | 3 |
| 19 | 750  | 1 |
| 20 | 460  | 1 |
| 21 | NA   | 2 |
| 22 | 598  | 2 |
| 23 | NA   | 2 |
| 24 | NA   | 2 |
| 25 | 1678 | 3 |
| 26 | 553  | 2 |
| 27 | 1134 | 2 |
| 28 | 715  | 1 |
| 29 | 774  | 2 |
| 30 | 1661 | 1 |
| 31 | 423  | 1 |
| 32 | 1660 | 2 |
| 33 | 1660 | 1 |
| 34 | 866  | 1 |
| 35 | 1657 | 2 |
| 36 | NA   | 2 |
| 37 | 71   | 3 |
| 38 | 1020 | 2 |
| 39 | 1159 | 2 |
| 40 | 618  | 2 |
| 41 | 1619 | 2 |
| 42 | 808  | 2 |
| 43 | 538  | 2 |
| 44 | 431  | 2 |
| 45 | 1612 | 2 |
| 46 | 35   | 2 |
| 47 | 847  | 2 |
| 48 | 470  | 2 |
| 49 | 222  | 2 |
| 50 | 1580 | 2 |

<https://jitc.bmj.com>

|    |      |   |
|----|------|---|
| 1  |      |   |
| 2  | 1570 | 2 |
| 3  | 1568 | 1 |
| 4  | 1567 | 1 |
| 5  | 1320 | 1 |
| 6  | 402  | 3 |
| 7  | 464  | 1 |
| 8  | 1555 | 1 |
| 9  | 1555 | 2 |
| 10 | 19   | 2 |
| 11 | 1546 | 1 |
| 12 | 1540 | 2 |
| 13 | 1539 | 2 |
| 14 | 1304 | 2 |
| 15 | 1534 | 2 |
| 16 | 1533 | 2 |
| 17 | 1533 | 2 |
| 18 | 1533 | 1 |
| 19 | 30   | 1 |
| 20 | 1527 | 1 |
| 21 | 1526 | 1 |
| 22 | 577  | 2 |
| 23 | 1520 | 1 |
| 24 | 565  | 2 |
| 25 | 1518 | 3 |
| 26 | 357  | 2 |
| 27 | 27   | 2 |
| 28 | 1514 | 2 |
| 29 | 1511 | 3 |
| 30 | 226  | 3 |
| 31 | 1506 | 2 |
| 32 | 437  | 1 |
| 33 | 615  | 1 |
| 34 | 1496 | 3 |
| 35 | 975  | 1 |
| 36 | 20   | 2 |
| 37 | 89   | 2 |
| 38 | 1478 | 3 |
| 39 | 1477 | 2 |
| 40 | 1476 | 2 |
| 41 | 1476 | 1 |
| 42 | 1475 | 2 |
| 43 | 1475 | 1 |
| 44 | 1470 | 3 |
| 45 | 1462 | 3 |
| 46 | 1455 | 2 |
| 47 | 42   | 2 |
| 48 | 315  | 2 |
| 49 | 721  | 1 |
| 50 | 1443 | 1 |

<https://jitc.bmj.com>

|    |      |   |
|----|------|---|
| 1  |      |   |
| 2  | 948  | 2 |
| 3  | 1016 | 2 |
| 4  | 490  | 2 |
| 5  | 1436 | 1 |
| 6  | 663  | 2 |
| 7  | 1429 | 1 |
| 8  | 8    | 2 |
| 9  | 1423 | 2 |
| 10 | 1028 | 2 |
| 11 | 1414 | 1 |
| 12 | 1409 | 2 |
| 13 | 1409 | 3 |
| 14 | 275  | 2 |
| 15 | 1401 | 2 |
| 16 | 1399 | 2 |
| 17 | 1068 | 2 |
| 18 | 1394 | 2 |
| 19 | 1393 | 3 |
| 20 | 1387 | 2 |
| 21 | 1387 | 2 |
| 22 | 139  | 2 |
| 23 | 482  | 2 |
| 24 | 237  | 2 |
| 25 | 114  | 2 |
| 26 | 1353 | 2 |
| 27 | 1350 | 3 |
| 28 | 1349 | 2 |
| 29 | 1345 | 1 |
| 30 | 1342 | 2 |
| 31 | 1332 | 2 |
| 32 | 1331 | 3 |
| 33 | 1325 | 1 |
| 34 | 1322 | 2 |
| 35 | 52   | 1 |
| 36 | 1317 | 2 |
| 37 | 1310 | 3 |
| 38 | 66   | 1 |
| 39 | 1300 | 1 |
| 40 | 1297 | 2 |
| 41 | 1293 | 2 |
| 42 | 48   | 1 |
| 43 | 1280 | 2 |
| 44 |      |   |
| 45 |      |   |
| 46 |      |   |
| 47 |      |   |
| 48 |      |   |
| 49 |      |   |
| 50 |      |   |
| 51 |      |   |
| 52 |      |   |
| 53 |      |   |
| 54 |      |   |
| 55 |      |   |
| 56 |      |   |
| 57 |      |   |
| 58 |      |   |
| 59 |      |   |
| 60 |      |   |

1  
2  
3  
4  
5  
6  
7  
8  
9  
10  
11  
12  
13  
14  
15  
16  
17  
18  
19  
20  
21  
22  
23  
24  
25  
26  
27  
28  
29  
30  
31  
32  
33  
34  
35  
36  
37  
38  
39  
40  
41  
42  
43  
44  
45  
46  
47  
48  
49  
50  
51  
52  
53  
54  
55  
56  
57  
58  
59  
60

**hampton Univ. Hospital**

Confidential: For Review Only

<https://jitc.bmj.com>

**Supplementary Table 6: Data of overall survival in the NSCLC adenocarcinoma (LI**

| Patient ID   | T/NL | Tumour.type |
|--------------|------|-------------|
| TCGA-50-6591 | T    | LUAD        |
| TCGA-55-7726 | T    | LUAD        |
| TCGA-62-A46O | T    | LUAD        |
| TCGA-71-6725 | T    | LUAD        |
| TCGA-97-8171 | T    | LUAD        |
| TCGA-91-6847 | T    | LUAD        |
| TCGA-64-1678 | T    | LUAD        |
| TCGA-50-5931 | T    | LUAD        |
| TCGA-NJ-A7XG | T    | LUAD        |
| TCGA-50-5946 | T    | LUAD        |
| TCGA-64-5775 | T    | LUAD        |
| TCGA-55-7815 | T    | LUAD        |
| TCGA-86-8054 | T    | LUAD        |
| TCGA-86-7955 | T    | LUAD        |
| TCGA-78-7633 | T    | LUAD        |
| TCGA-86-8279 | T    | LUAD        |
| TCGA-73-4670 | T    | LUAD        |
| TCGA-49-AAR9 | T    | LUAD        |
| TCGA-55-7724 | T    | LUAD        |
| TCGA-MP-A4SY | T    | LUAD        |
| TCGA-69-7979 | T    | LUAD        |
| TCGA-73-4659 | T    | LUAD        |
| TCGA-44-7671 | T    | LUAD        |
| TCGA-93-8067 | T    | LUAD        |
| TCGA-05-4420 | T    | LUAD        |
| TCGA-55-6972 | T    | LUAD        |
| TCGA-55-8512 | T    | LUAD        |
| TCGA-86-7714 | T    | LUAD        |
| TCGA-05-5428 | T    | LUAD        |
| TCGA-55-7727 | T    | LUAD        |
| TCGA-J2-8194 | T    | LUAD        |
| TCGA-55-8087 | T    | LUAD        |
| TCGA-97-8179 | T    | LUAD        |
| TCGA-78-7155 | T    | LUAD        |
| TCGA-55-6981 | T    | LUAD        |
| TCGA-64-1680 | T    | LUAD        |
| TCGA-97-7937 | T    | LUAD        |
| TCGA-86-8674 | T    | LUAD        |
| TCGA-55-7725 | T    | LUAD        |
| TCGA-55-8505 | T    | LUAD        |
| TCGA-55-7913 | T    | LUAD        |
| TCGA-62-A46P | T    | LUAD        |
| TCGA-50-5932 | T    | LUAD        |
| TCGA-50-5072 | T    | LUAD        |
| TCGA-95-7043 | T    | LUAD        |
| TCGA-78-7150 | T    | LUAD        |

<https://jitc.bmj.com>

|    |              |   |      |
|----|--------------|---|------|
| 1  |              |   |      |
| 2  | TCGA-44-2665 | T | LUAD |
| 3  | TCGA-05-4397 | T | LUAD |
| 4  | TCGA-05-5429 | T | LUAD |
| 5  | TCGA-64-5774 | T | LUAD |
| 6  | TCGA-55-8094 | T | LUAD |
| 7  | TCGA-NJ-A4YF | T | LUAD |
| 8  | TCGA-67-6215 | T | LUAD |
| 9  | TCGA-05-4390 | T | LUAD |
| 10 | TCGA-97-7938 | T | LUAD |
| 11 | TCGA-78-7158 | T | LUAD |
| 12 | TCGA-MP-A5C7 | T | LUAD |
| 13 | TCGA-05-5715 | T | LUAD |
| 14 | TCGA-44-6776 | T | LUAD |
| 15 | TCGA-50-5944 | T | LUAD |
| 16 | TCGA-55-7910 | T | LUAD |
| 17 | TCGA-NJ-A4YI | T | LUAD |
| 18 | TCGA-J2-A4AD | T | LUAD |
| 19 | TCGA-95-8494 | T | LUAD |
| 20 | TCGA-44-7670 | T | LUAD |
| 21 | TCGA-91-6836 | T | LUAD |
| 22 | TCGA-62-A46V | T | LUAD |
| 23 | TCGA-38-4631 | T | LUAD |
| 24 | TCGA-62-A470 | T | LUAD |
| 25 | TCGA-38-4628 | T | LUAD |
| 26 | TCGA-78-7156 | T | LUAD |
| 27 | TCGA-55-7570 | T | LUAD |
| 28 | TCGA-78-7154 | T | LUAD |
| 29 | TCGA-35-3615 | T | LUAD |
| 30 | TCGA-55-8507 | T | LUAD |
| 31 | TCGA-49-4486 | T | LUAD |
| 32 | TCGA-44-7667 | T | LUAD |
| 33 | TCGA-86-7711 | T | LUAD |
| 34 | TCGA-62-A471 | T | LUAD |
| 35 | TCGA-78-7167 | T | LUAD |
| 36 | TCGA-69-7764 | T | LUAD |
| 37 | TCGA-44-2666 | T | LUAD |
| 38 | TCGA-73-4677 | T | LUAD |
| 39 | TCGA-97-A4M3 | T | LUAD |
| 40 | TCGA-J2-8192 | T | LUAD |
| 41 | TCGA-62-8397 | T | LUAD |
| 42 | TCGA-55-A57B | T | LUAD |
| 43 | TCGA-73-4676 | T | LUAD |
| 44 | TCGA-62-8399 | T | LUAD |
| 45 | TCGA-78-7220 | T | LUAD |
| 46 | TCGA-97-8175 | T | LUAD |
| 47 | TCGA-55-8090 | T | LUAD |
| 48 | TCGA-91-6829 | T | LUAD |
| 49 | TCGA-44-A47B | T | LUAD |
| 50 | TCGA-73-A9RS | T | LUAD |
| 51 |              |   |      |
| 52 |              |   |      |
| 53 |              |   |      |
| 54 |              |   |      |
| 55 |              |   |      |
| 56 |              |   |      |
| 57 |              |   |      |
| 58 |              |   |      |
| 59 |              |   |      |
| 60 |              |   |      |

<https://jitc.bmj.com>



|    |              |   |      |
|----|--------------|---|------|
| 1  |              |   |      |
| 2  | TCGA-73-4668 | T | LUAD |
| 3  | TCGA-78-8662 | T | LUAD |
| 4  | TCGA-91-A4BD | T | LUAD |
| 5  | TCGA-05-4396 | T | LUAD |
| 6  | TCGA-38-4630 | T | LUAD |
| 7  | TCGA-69-7973 | T | LUAD |
| 8  | TCGA-99-8025 | T | LUAD |
| 9  | TCGA-44-5644 | T | LUAD |
| 10 | TCGA-73-4675 | T | LUAD |
| 11 | TCGA-44-2662 | T | LUAD |
| 12 | TCGA-05-4395 | T | LUAD |
| 13 | TCGA-67-4679 | T | LUAD |
| 14 | TCGA-55-8614 | T | LUAD |
| 15 | TCGA-97-8547 | T | LUAD |
| 16 | TCGA-69-8253 | T | LUAD |
| 17 | TCGA-78-7149 | T | LUAD |
| 18 | TCGA-86-7713 | T | LUAD |
| 19 | TCGA-67-3770 | T | LUAD |
| 20 | TCGA-55-1592 | T | LUAD |
| 21 | TCGA-55-6984 | T | LUAD |
| 22 | TCGA-86-8055 | T | LUAD |
| 23 | TCGA-L9-A5IP | T | LUAD |
| 24 | TCGA-91-8499 | T | LUAD |
| 25 | TCGA-55-8207 | T | LUAD |
| 26 | TCGA-55-6975 | T | LUAD |
| 27 | TCGA-44-7660 | T | LUAD |
| 28 | TCGA-78-7542 | T | LUAD |
| 29 | TCGA-99-8032 | T | LUAD |
| 30 | TCGA-49-4510 | T | LUAD |
| 31 | TCGA-38-4626 | T | LUAD |
| 32 | TCGA-86-8358 | T | LUAD |
| 33 | TCGA-55-A48Y | T | LUAD |
| 34 | TCGA-62-8398 | T | LUAD |
| 35 | TCGA-91-8496 | T | LUAD |
| 36 | TCGA-05-4427 | T | LUAD |
| 37 | TCGA-86-A4D0 | T | LUAD |
| 38 | TCGA-93-A4JP | T | LUAD |
| 39 | TCGA-38-6178 | T | LUAD |
| 40 | TCGA-78-7537 | T | LUAD |
| 41 | TCGA-05-4426 | T | LUAD |
| 42 | TCGA-50-6673 | T | LUAD |
| 43 | TCGA-50-5936 | T | LUAD |
| 44 | TCGA-05-4384 | T | LUAD |
| 45 | TCGA-44-8119 | T | LUAD |
| 46 | TCGA-53-7624 | T | LUAD |
| 47 | TCGA-49-6742 | T | LUAD |
| 48 | TCGA-44-4112 | T | LUAD |
| 49 | TCGA-71-8520 | T | LUAD |
| 50 | TCGA-97-8176 | T | LUAD |
| 51 |              |   |      |
| 52 |              |   |      |
| 53 |              |   |      |
| 54 |              |   |      |
| 55 |              |   |      |
| 56 |              |   |      |
| 57 |              |   |      |
| 58 |              |   |      |
| 59 |              |   |      |
| 60 |              |   |      |

<https://jitc.bmj.com>

|    |              |   |      |
|----|--------------|---|------|
| 1  |              |   |      |
| 2  | TCGA-86-8056 | T | LUAD |
| 3  | TCGA-55-6543 | T | LUAD |
| 4  | TCGA-53-7813 | T | LUAD |
| 5  | TCGA-95-7562 | T | LUAD |
| 6  | TCGA-78-7161 | T | LUAD |
| 7  | TCGA-44-3398 | T | LUAD |
| 8  | TCGA-35-5375 | T | LUAD |
| 9  | TCGA-55-1596 | T | LUAD |
| 10 | TCGA-86-A456 | T | LUAD |
| 11 | TCGA-86-8075 | T | LUAD |
| 12 | TCGA-64-1676 | T | LUAD |
| 13 | TCGA-78-7163 | T | LUAD |
| 14 | TCGA-55-8615 | T | LUAD |
| 15 | TCGA-50-5939 | T | LUAD |
| 16 | TCGA-44-6148 | T | LUAD |
| 17 | TCGA-49-4494 | T | LUAD |
| 18 | TCGA-05-4405 | T | LUAD |
| 19 | TCGA-05-4415 | T | LUAD |
| 20 | TCGA-4B-A93V | T | LUAD |
| 21 | TCGA-78-7535 | T | LUAD |
| 22 | TCGA-95-7948 | T | LUAD |
| 23 | TCGA-78-7536 | T | LUAD |
| 24 | TCGA-62-8395 | T | LUAD |
| 25 | TCGA-69-7763 | T | LUAD |
| 26 | TCGA-44-7669 | T | LUAD |
| 27 | TCGA-64-1679 | T | LUAD |
| 28 | TCGA-L9-A443 | T | LUAD |
| 29 | TCGA-55-8513 | T | LUAD |
| 30 | TCGA-64-5815 | T | LUAD |
| 31 | TCGA-44-7659 | T | LUAD |
| 32 | TCGA-91-6828 | T | LUAD |
| 33 | TCGA-55-8206 | T | LUAD |
| 34 | TCGA-38-4627 | T | LUAD |
| 35 | TCGA-55-A492 | T | LUAD |
| 36 | TCGA-44-8120 | T | LUAD |
| 37 | TCGA-05-4424 | T | LUAD |
| 38 | TCGA-62-A46S | T | LUAD |
| 39 | TCGA-50-5051 | T | LUAD |
| 40 | TCGA-44-2655 | T | LUAD |
| 41 | TCGA-78-7166 | T | LUAD |
| 42 | TCGA-86-6562 | T | LUAD |
| 43 | TCGA-NJ-A55R | T | LUAD |
| 44 | TCGA-55-6986 | T | LUAD |
| 45 | TCGA-44-A47A | T | LUAD |
| 46 | TCGA-50-5930 | T | LUAD |
| 47 | TCGA-75-5146 | T | LUAD |
| 48 | TCGA-75-6212 | T | LUAD |
| 49 | TCGA-86-A4JF | T | LUAD |
| 50 | TCGA-78-7159 | T | LUAD |
| 51 |              |   |      |
| 52 |              |   |      |
| 53 |              |   |      |
| 54 |              |   |      |
| 55 |              |   |      |
| 56 |              |   |      |
| 57 |              |   |      |
| 58 |              |   |      |
| 59 |              |   |      |
| 60 |              |   |      |

<https://jitc.bmj.com>

|    |              |   |      |
|----|--------------|---|------|
| 1  |              |   |      |
| 2  | TCGA-J2-A4AE | T | LUAD |
| 3  | TCGA-86-8074 | T | LUAD |
| 4  | TCGA-50-5942 | T | LUAD |
| 5  | TCGA-55-8091 | T | LUAD |
| 6  | TCGA-86-8073 | T | LUAD |
| 7  | TCGA-64-1681 | T | LUAD |
| 8  | TCGA-55-8096 | T | LUAD |
| 9  | TCGA-97-7547 | T | LUAD |
| 10 | TCGA-O1-A52J | T | LUAD |
| 11 | TCGA-50-6593 | T | LUAD |
| 12 | TCGA-55-8616 | T | LUAD |
| 13 | TCGA-MP-A4TF | T | LUAD |
| 14 | TCGA-55-8204 | T | LUAD |
| 15 | TCGA-62-8394 | T | LUAD |
| 16 | TCGA-NJ-A55O | T | LUAD |
| 17 | TCGA-67-6216 | T | LUAD |
| 18 | TCGA-93-A4JN | T | LUAD |
| 19 | TCGA-05-4249 | T | LUAD |
| 20 | TCGA-05-4403 | T | LUAD |
| 21 | TCGA-49-4512 | T | LUAD |
| 22 | TCGA-80-5611 | T | LUAD |
| 23 | TCGA-49-6743 | T | LUAD |
| 24 | TCGA-MP-A4TA | T | LUAD |
| 25 | TCGA-67-3771 | T | LUAD |
| 26 | TCGA-MP-A4T7 | T | LUAD |
| 27 | TCGA-55-A494 | T | LUAD |
| 28 | TCGA-49-AARR | T | LUAD |
| 29 | TCGA-99-8033 | T | LUAD |
| 30 | TCGA-44-5643 | T | LUAD |
| 31 | TCGA-91-6831 | T | LUAD |
| 32 | TCGA-44-6775 | T | LUAD |
| 33 | TCGA-49-4506 | T | LUAD |
| 34 | TCGA-55-1594 | T | LUAD |
| 35 | TCGA-05-4402 | T | LUAD |
| 36 | TCGA-75-7025 | T | LUAD |
| 37 | TCGA-97-7554 | T | LUAD |
| 38 | TCGA-50-5933 | T | LUAD |
| 39 | TCGA-78-8640 | T | LUAD |
| 40 | TCGA-MN-A4N4 | T | LUAD |
| 41 | TCGA-73-4658 | T | LUAD |
| 42 | TCGA-64-5779 | T | LUAD |
| 43 | TCGA-95-A4VP | T | LUAD |
| 44 | TCGA-50-6595 | T | LUAD |
| 45 | TCGA-44-6146 | T | LUAD |
| 46 | TCGA-86-7953 | T | LUAD |
| 47 | TCGA-55-5899 | T | LUAD |
| 48 | TCGA-67-6217 | T | LUAD |
| 49 | TCGA-44-7662 | T | LUAD |
| 50 | TCGA-MN-A4N1 | T | LUAD |
| 51 |              |   |      |
| 52 |              |   |      |
| 53 |              |   |      |
| 54 |              |   |      |
| 55 |              |   |      |
| 56 |              |   |      |
| 57 |              |   |      |
| 58 |              |   |      |
| 59 |              |   |      |
| 60 |              |   |      |

<https://jitc.bmj.com>

|    |              |   |      |
|----|--------------|---|------|
| 1  |              |   |      |
| 2  | TCGA-55-7576 | T | LUAD |
| 3  | TCGA-55-1595 | T | LUAD |
| 4  | TCGA-97-8174 | T | LUAD |
| 5  | TCGA-64-1677 | T | LUAD |
| 6  | TCGA-97-A4M5 | T | LUAD |
| 7  | TCGA-05-4418 | T | LUAD |
| 8  | TCGA-97-8552 | T | LUAD |
| 9  | TCGA-55-8097 | T | LUAD |
| 10 | TCGA-55-8514 | T | LUAD |
| 11 | TCGA-97-8177 | T | LUAD |
| 12 | TCGA-44-6774 | T | LUAD |
| 13 | TCGA-91-6849 | T | LUAD |
| 14 | TCGA-44-6147 | T | LUAD |
| 15 | TCGA-91-6830 | T | LUAD |
| 16 | TCGA-67-3773 | T | LUAD |
| 17 | TCGA-62-A472 | T | LUAD |
| 18 | TCGA-93-7348 | T | LUAD |
| 19 | TCGA-49-4488 | T | LUAD |
| 20 | TCGA-05-4430 | T | LUAD |
| 21 | TCGA-78-7148 | T | LUAD |
| 22 | TCGA-97-7546 | T | LUAD |
| 23 | TCGA-95-7947 | T | LUAD |
| 24 | TCGA-44-8117 | T | LUAD |
| 25 | TCGA-86-8278 | T | LUAD |
| 26 | TCGA-97-A4M1 | T | LUAD |
| 27 | TCGA-97-A4M7 | T | LUAD |
| 28 | TCGA-49-4501 | T | LUAD |
| 29 | TCGA-05-5423 | T | LUAD |
| 30 | TCGA-38-4632 | T | LUAD |
| 31 | TCGA-55-6970 | T | LUAD |
| 32 | TCGA-62-A46Y | T | LUAD |
| 33 | TCGA-86-8669 | T | LUAD |
| 34 | TCGA-62-A46R | T | LUAD |
| 35 | TCGA-44-7661 | T | LUAD |
| 36 | TCGA-50-6592 | T | LUAD |
| 37 | TCGA-86-8668 | T | LUAD |
| 38 | TCGA-91-6840 | T | LUAD |
| 39 | TCGA-69-8254 | T | LUAD |
| 40 | TCGA-05-4432 | T | LUAD |
| 41 | TCGA-MP-A4T8 | T | LUAD |
| 42 | TCGA-J2-A4AG | T | LUAD |
| 43 | TCGA-78-7540 | T | LUAD |
| 44 | TCGA-55-7283 | T | LUAD |
| 45 | TCGA-50-5068 | T | LUAD |
| 46 | TCGA-55-A4DF | T | LUAD |
| 47 | TCGA-69-8453 | T | LUAD |
| 48 | TCGA-MP-A4TC | T | LUAD |
| 49 | TCGA-38-4625 | T | LUAD |
| 50 | TCGA-78-7152 | T | LUAD |
| 51 |              |   |      |
| 52 |              |   |      |
| 53 |              |   |      |
| 54 |              |   |      |
| 55 |              |   |      |
| 56 |              |   |      |
| 57 |              |   |      |
| 58 |              |   |      |
| 59 |              |   |      |
| 60 |              |   |      |

<https://jitc.bmj.com>

|    |              |   |      |
|----|--------------|---|------|
| 1  |              |   |      |
| 2  | TCGA-50-5044 | T | LUAD |
| 3  | TCGA-78-7143 | T | LUAD |
| 4  | TCGA-49-AARN | T | LUAD |
| 5  | TCGA-78-7147 | T | LUAD |
| 6  | TCGA-69-7760 | T | LUAD |
| 7  | TCGA-NJ-A4YP | T | LUAD |
| 8  | TCGA-91-6848 | T | LUAD |
| 9  | TCGA-55-8506 | T | LUAD |
| 10 | TCGA-05-4433 | T | LUAD |
| 11 | TCGA-05-4382 | T | LUAD |
| 12 | TCGA-50-5066 | T | LUAD |
| 13 | TCGA-73-7498 | T | LUAD |
| 14 | TCGA-95-7039 | T | LUAD |
| 15 | TCGA-MP-A4TD | T | LUAD |
| 16 | TCGA-95-8039 | T | LUAD |
| 17 | TCGA-97-7941 | T | LUAD |
| 18 | TCGA-75-5147 | T | LUAD |
| 19 | TCGA-MP-A4TK | T | LUAD |
| 20 | TCGA-55-A4DG | T | LUAD |
| 21 | TCGA-69-A59K | T | LUAD |
| 22 | TCGA-67-3772 | T | LUAD |
| 23 | TCGA-50-8460 | T | LUAD |
| 24 | TCGA-67-3774 | T | LUAD |
| 25 | TCGA-69-7974 | T | LUAD |
| 26 | TCGA-86-8585 | T | LUAD |
| 27 | TCGA-55-6642 | T | LUAD |
| 28 | TCGA-49-4505 | T | LUAD |
| 29 | TCGA-L4-A4E6 | T | LUAD |
| 30 | TCGA-78-7162 | T | LUAD |
| 31 | TCGA-44-3396 | T | LUAD |
| 32 | TCGA-78-8655 | T | LUAD |
| 33 | TCGA-MP-A4T6 | T | LUAD |
| 34 | TCGA-38-4629 | T | LUAD |
| 35 | TCGA-49-AARO | T | LUAD |
| 36 | TCGA-95-A4VK | T | LUAD |
| 37 | TCGA-86-8673 | T | LUAD |
| 38 | TCGA-86-8359 | T | LUAD |
| 39 | TCGA-05-4425 | T | LUAD |
| 40 | TCGA-73-4662 | T | LUAD |
| 41 | TCGA-95-7567 | T | LUAD |
| 42 | TCGA-50-7109 | T | LUAD |
| 43 | TCGA-55-8085 | T | LUAD |
| 44 | TCGA-69-7765 | T | LUAD |
| 45 | TCGA-49-AAR0 | T | LUAD |
| 46 | TCGA-49-AAQV | T | LUAD |
| 47 | TCGA-55-7903 | T | LUAD |
| 48 | TCGA-44-A4SS | T | LUAD |
| 49 | TCGA-55-6712 | T | LUAD |
| 50 | TCGA-55-6983 | T | LUAD |
| 51 |              |   |      |
| 52 |              |   |      |
| 53 |              |   |      |
| 54 |              |   |      |
| 55 |              |   |      |
| 56 |              |   |      |
| 57 |              |   |      |
| 58 |              |   |      |
| 59 |              |   |      |
| 60 |              |   |      |

<https://jitc.bmj.com>

|    |              |   |      |
|----|--------------|---|------|
| 1  |              |   |      |
| 2  | TCGA-44-6145 | T | LUAD |
| 3  | TCGA-49-4490 | T | LUAD |
| 4  | TCGA-55-8511 | T | LUAD |
| 5  | TCGA-83-5908 | T | LUAD |
| 6  | TCGA-86-8672 | T | LUAD |
| 7  | TCGA-05-5425 | T | LUAD |
| 8  | TCGA-49-AAR2 | T | LUAD |
| 9  | TCGA-55-7227 | T | LUAD |
| 10 | TCGA-78-7153 | T | LUAD |
| 11 | TCGA-78-7160 | T | LUAD |
| 12 | TCGA-55-8092 | T | LUAD |
| 13 | TCGA-L9-A7SV | T | LUAD |
| 14 | TCGA-49-6744 | T | LUAD |
| 15 | TCGA-44-A4SU | T | LUAD |
| 16 | TCGA-55-6985 | T | LUAD |
| 17 | TCGA-69-7761 | T | LUAD |
| 18 | TCGA-55-7911 | T | LUAD |
| 19 | TCGA-55-7574 | T | LUAD |
| 20 | TCGA-55-6968 | T | LUAD |
| 21 | TCGA-91-8497 | T | LUAD |
| 22 | TCGA-55-7573 | T | LUAD |
| 23 | TCGA-86-A4P7 | T | LUAD |
| 24 | TCGA-75-5125 | T | LUAD |
| 25 | TCGA-91-7771 | T | LUAD |
| 26 | TCGA-86-8280 | T | LUAD |
| 27 | TCGA-55-A491 | T | LUAD |
| 28 | TCGA-97-7553 | T | LUAD |
| 29 | TCGA-49-AARQ | T | LUAD |
| 30 | TCGA-78-7145 | T | LUAD |
| 31 | TCGA-44-6777 | T | LUAD |
| 32 | TCGA-55-8508 | T | LUAD |
| 33 | TCGA-44-A479 | T | LUAD |
| 34 | TCGA-50-8457 | T | LUAD |
| 35 | TCGA-55-7914 | T | LUAD |
| 36 | TCGA-05-4417 | T | LUAD |
| 37 | TCGA-53-7626 | T | LUAD |
| 38 | TCGA-64-5781 | T | LUAD |
| 39 | TCGA-35-4122 | T | LUAD |
| 40 | TCGA-69-7980 | T | LUAD |
| 41 | TCGA-97-A4M0 | T | LUAD |
| 42 | TCGA-50-6590 | T | LUAD |
| 43 | TCGA-44-5645 | T | LUAD |
| 44 | TCGA-86-A4P8 | T | LUAD |
| 45 | TCGA-55-A48X | T | LUAD |
| 46 | TCGA-44-2668 | T | LUAD |
| 47 | TCGA-50-5935 | T | LUAD |
| 48 | TCGA-05-4398 | T | LUAD |
| 49 | TCGA-S2-AA1A | T | LUAD |
| 50 | TCGA-53-A4EZ | T | LUAD |
| 51 |              |   |      |
| 52 |              |   |      |
| 53 |              |   |      |
| 54 |              |   |      |
| 55 |              |   |      |
| 56 |              |   |      |
| 57 |              |   |      |
| 58 |              |   |      |
| 59 |              |   |      |
| 60 |              |   |      |

<https://jitc.bmj.com>

|    |              |   |      |
|----|--------------|---|------|
| 1  |              |   |      |
| 2  | TCGA-55-8299 | T | LUAD |
| 3  | TCGA-NJ-A55A | T | LUAD |
| 4  | TCGA-05-4434 | T | LUAD |
| 5  | TCGA-95-A4VN | T | LUAD |
| 6  | TCGA-MP-A4SV | T | LUAD |
| 7  | TCGA-55-8621 | T | LUAD |
| 8  | TCGA-38-A44F | T | LUAD |
| 9  | TCGA-55-8205 | T | LUAD |
| 10 | TCGA-55-8620 | T | LUAD |
| 11 | TCGA-MP-A4T9 | T | LUAD |
| 12 | TCGA-55-A48Z | T | LUAD |
| 13 | TCGA-44-6779 | T | LUAD |
| 14 | TCGA-L4-A4E5 | T | LUAD |
| 15 | TCGA-62-8402 | T | LUAD |
| 16 | TCGA-86-7701 | T | LUAD |
| 17 | TCGA-97-A4M2 | T | LUAD |
| 18 | TCGA-44-A47G | T | LUAD |
| 19 | TCGA-44-2656 | T | LUAD |
| 20 | TCGA-05-4422 | T | LUAD |
| 21 | TCGA-44-6778 | T | LUAD |
| 22 | TCGA-78-7539 | T | LUAD |
| 23 | TCGA-50-8459 | T | LUAD |
| 24 | TCGA-55-8203 | T | LUAD |
| 25 | TCGA-86-7954 | T | LUAD |
| 26 | TCGA-55-7284 | T | LUAD |
| 27 | TCGA-97-8172 | T | LUAD |
| 28 | TCGA-05-5420 | T | LUAD |
| 29 | TCGA-49-AARE | T | LUAD |
| 30 | TCGA-99-7458 | T | LUAD |
| 31 | TCGA-78-8648 | T | LUAD |
| 32 | TCGA-55-6980 | T | LUAD |
| 33 | TCGA-MP-A4SW | T | LUAD |
| 34 | TCGA-49-4514 | T | LUAD |
| 35 | TCGA-05-4250 | T | LUAD |
| 36 | TCGA-MN-A4N5 | T | LUAD |
| 37 | TCGA-55-6969 | T | LUAD |
| 38 | TCGA-93-A4JO | T | LUAD |
| 39 | TCGA-55-8089 | T | LUAD |
| 40 | TCGA-55-6982 | T | LUAD |
| 41 | TCGA-99-AA5R | T | LUAD |
| 42 | TCGA-44-3919 | T | LUAD |
| 43 | TCGA-44-2661 | T | LUAD |
| 44 | TCGA-69-7978 | T | LUAD |
| 45 | TCGA-49-4507 | T | LUAD |
| 46 | TCGA-64-5778 | T | LUAD |
| 47 | TCGA-55-6978 | T | LUAD |
| 48 | TCGA-86-8076 | T | LUAD |
| 49 | TCGA-55-8619 | T | LUAD |
| 50 | TCGA-49-6745 | T | LUAD |
| 51 |              |   |      |
| 52 |              |   |      |
| 53 |              |   |      |
| 54 |              |   |      |
| 55 |              |   |      |
| 56 |              |   |      |
| 57 |              |   |      |
| 58 |              |   |      |
| 59 |              |   |      |
| 60 |              |   |      |

<https://jitc.bmj.com>



|    |              |   |      |
|----|--------------|---|------|
| 1  |              |   |      |
| 2  | TCGA-50-5941 | T | LUAD |
| 3  | TCGA-44-7672 | T | LUAD |
| 4  | TCGA-50-5045 | T | LUAD |
| 5  | TCGA-MP-A4TJ | T | LUAD |
| 6  | TCGA-55-6971 | T | LUAD |
| 7  | TCGA-78-7146 | T | LUAD |
| 8  | TCGA-MP-A4TH | T | LUAD |
| 9  | TCGA-05-4389 | T | LUAD |
| 10 | TCGA-44-2659 | T | LUAD |
| 11 | TCGA-55-6979 | T | LUAD |
| 12 | TCGA-69-8255 | T | LUAD |
| 13 | TCGA-L9-A743 | T | LUAD |
| 14 | TCGA-55-7728 | T | LUAD |
| 15 | TCGA-L9-A50W | T | LUAD |
| 16 | TCGA-55-8510 | T | LUAD |
| 17 | TCGA-55-A493 | T | LUAD |
| 18 | TCGA-49-4487 | T | LUAD |
| 19 | TCGA-95-7944 | T | LUAD |
| 20 | TCGA-50-6594 | T | LUAD |
| 21 | TCGA-93-A4JQ | T | LUAD |
| 22 | TCGA-55-7994 | T | LUAD |
| 23 | TCGA-55-8301 | T | LUAD |
| 24 | TCGA-73-7499 | T | LUAD |
| 25 | TCGA-L9-A8F4 | T | LUAD |
| 26 | TCGA-62-A46U | T | LUAD |
| 27 | TCGA-55-7995 | T | LUAD |
| 28 | TCGA-35-4123 | T | LUAD |
| 29 | TCGA-44-3918 | T | LUAD |
| 30 | TCGA-78-8660 | T | LUAD |
| 31 | TCGA-99-8028 | T | LUAD |
| 32 | TCGA-55-8208 | T | LUAD |
| 33 | TCGA-38-7271 | T | LUAD |
| 34 | TCGA-MP-A4T4 | T | LUAD |
| 35 | TCGA-50-5049 | T | LUAD |
| 36 | TCGA-50-6597 | T | LUAD |
| 37 | TCGA-91-6835 | T | LUAD |
| 38 | TCGA-73-4666 | T | LUAD |
| 39 | TCGA-55-8302 | T | LUAD |
| 40 | TCGA-97-A4LX | T | LUAD |
| 41 | TCGA-50-5055 | T | LUAD |
| 42 | TCGA-97-7552 | T | LUAD |
| 43 | TCGA-44-2657 | T | LUAD |
| 44 | TCGA-NJ-A4YQ | T | LUAD |
| 45 | TCGA-86-6851 | T | LUAD |
| 46 | TCGA-97-A4M6 | T | LUAD |
| 47 | TCGA-55-7281 | T | LUAD |
| 48 | TCGA-55-6987 | T | LUAD |
| 49 | TCGA-55-7907 | T | LUAD |
| 50 | TCGA-49-AAR4 | T | LUAD |
| 51 |              |   |      |
| 52 |              |   |      |
| 53 |              |   |      |
| 54 |              |   |      |
| 55 |              |   |      |
| 56 |              |   |      |
| 57 |              |   |      |
| 58 |              |   |      |
| 59 |              |   |      |
| 60 |              |   |      |

<https://jitc.bmj.com>



1  
2  
3  
4  
5  
6  
7  
8  
9  
10  
11  
12  
13  
14  
15  
16  
17  
18  
19  
20  
21  
22  
23  
24  
25  
26  
27  
28  
29  
30  
31  
32  
33  
34  
35  
36  
37  
38  
39  
40  
41  
42  
43  
44  
45  
46  
47  
48  
49  
50  
51  
52  
53  
54  
55  
56  
57  
58  
59  
60

|              |   |      |
|--------------|---|------|
| TCGA-93-7347 | T | LUAD |
| TCGA-49-AAR3 | T | LUAD |
| TCGA-49-6767 | T | LUAD |
| TCGA-MP-A4T1 | T | LUAD |
| TCGA-L9-A444 | T | LUAD |
| TCGA-91-A4BC | T | LUAD |
| TCGA-86-8671 | T | LUAD |
| TCGA-49-6761 | T | LUAD |

Cohort is composed of n=511 but complete data of survival is only available from 495

## UAD) retrospective cohort of The Cancer Genome Atlas TCGA

| Dead/Alive | Combined survival | CXCL9   | CXCR3  | CD68    |
|------------|-------------------|---------|--------|---------|
| 1          | 119               | 2.9205  | 1.9953 | 9.1914  |
| 0          | 652               | 9.5368  | 2.8502 | 11.3244 |
| 1          | 1454              | 7.0981  | 2.9428 | 9.5031  |
| 0          | 256               | 4.1324  | 3.0855 | 10.685  |
| 0          | 568               | 5.7571  | 3.1015 | 11.1608 |
| 0          | 842               | 9.1718  | 3.2581 | 8.2014  |
| 0          | 1189              | 6.7766  | 3.3737 | 9.163   |
| 1          | 434               | 7.2706  | 3.5524 | 10.7519 |
| 0          | 617               | 6.406   | 3.5838 | 10.0718 |
| 0          | 1617              | 8.9542  | 3.653  | 10.6602 |
| 1          | 62                | 5.5241  | 3.8539 | 12.8749 |
| 0          | 773               | 10.3887 | 3.9096 | 11.469  |
| 0          | 1148              | 7.8316  | 3.9374 | 10.9707 |
| 0          | 1072              | 7.0047  | 3.9782 | 10.3007 |
| 1          | 1528              | 6.5677  | 4.0979 | 11.1552 |
| 0          | 949               | 7.7417  | 4.1124 | 11.3032 |
| 0          | 131               | 8.3182  | 4.121  | 12.2707 |
| 1          | 260               | 12.3961 | 4.2402 | 9.9161  |
| 0          | 705               | 10.9751 | 4.2507 | 12.7836 |
| 1          | 1501              | 8.389   | 4.3563 | 12.4428 |
| 0          | 408               | 10.4352 | 4.3927 | 11.4915 |
| 1          | 711               | 7.536   | 4.4096 | 13.2189 |
| 0          | 889               | 6.1929  | 4.425  | 11.9446 |
| 0          | 186               | 9.6111  | 4.483  | 11.572  |
| 0          | 912               | 6.9395  | 4.4958 | 12.0484 |
| 1          | 1632              | 6.7891  | 4.504  | 8.2884  |
| 1          | 607               | 5.6019  | 4.5514 | 11.3159 |
| 1          | 625               | 7.8238  | 4.558  | 11.354  |
| 0          | 670               | 8.6038  | 4.6173 | 11.5912 |
| 0          | 119               | 11.2643 | 4.6354 | 10.9849 |
| 0          | 724               | 9.2293  | 4.643  | 11.341  |
| 0          | 462               | 6.6203  | 4.6686 | 11.4316 |
| 0          | 435               | 8.8662  | 4.6694 | 11.8339 |
| 1          | 1171              | 11.3088 | 4.694  | 10.2626 |
| 1          | 1379              | 6.321   | 4.7246 | 11.2039 |
| 0          | 1126              | 8.3916  | 4.7633 | 11.482  |
| 0          | 564               | 8.0276  | 4.8031 | 10.9801 |
| 0          | 806               | 8.2821  | 4.8632 | 10.8217 |
| 0          | 442               | 12.0511 | 4.8758 | 12.13   |
| 0          | 440               | 6.9214  | 4.9008 | 11.9612 |
| 1          | 561               | 9.1234  | 4.9198 | 10.2571 |
| 1          | 594               | 6.3073  | 4.9224 | 10.6181 |
| 1          | 1235              | 7.4283  | 4.9312 | 11.9965 |
| 1          | 250               | 9.0457  | 4.9336 | 13.631  |
| 1          | 503               | 7.7638  | 4.9442 | 10.2102 |
| 1          | 666               | 8.3752  | 4.9464 | 11.5677 |

<https://jitc.bmj.com>

|    |   |      |         |        |         |
|----|---|------|---------|--------|---------|
| 1  |   |      |         |        |         |
| 2  | 0 | 1301 | 8.0277  | 5.0139 | 12.2655 |
| 3  | 1 | 731  | 10.2977 | 5.0261 | 12.6113 |
| 4  | 1 | 275  | 6.8988  | 5.0316 | 11.7861 |
| 5  | 0 | 2676 | 8.0366  | 5.0365 | 9.7971  |
| 6  | 0 | 541  | 5.4369  | 5.0525 | 13.4242 |
| 7  | 0 | 2161 | 8.7861  | 5.0531 | 11.271  |
| 8  | 0 | 174  | 8.1386  | 5.0778 | 12.4616 |
| 9  | 0 | 1126 | 8.8521  | 5.0964 | 11.7114 |
| 10 | 1 | 18   | 9.8293  | 5.0973 | 11.2207 |
| 11 | 1 | 179  | 7.9414  | 5.1131 | 11.3156 |
| 12 | 0 | 2248 | 8.7246  | 5.1305 | 10.0022 |
| 13 | 0 | 62   | 7.0291  | 5.1438 | 13.3434 |
| 14 | 0 | 2616 | 7.5138  | 5.149  | 10.5531 |
| 15 | 0 | 1750 | 8.1953  | 5.1603 | 12.6569 |
| 16 | 0 | 1040 | 8.3971  | 5.1773 | 10.3879 |
| 17 | 1 | 4    | 5.7559  | 5.1931 | 12.8648 |
| 18 | 1 | 550  | 4.7756  | 5.1988 | 10.3976 |
| 19 | 0 | 84   | 5.1974  | 5.2222 | 11.7721 |
| 20 | 0 | 882  | 9.2636  | 5.228  | 11.0822 |
| 21 | 0 | 417  | 8.3877  | 5.2331 | 10.6311 |
| 22 | 0 | 2199 | 7.2561  | 5.2374 | 11.5697 |
| 23 | 1 | 354  | 9.9418  | 5.2435 | 13.2569 |
| 24 | 0 | 1246 | 8.5187  | 5.2459 | 12.3057 |
| 25 | 1 | 1492 | 4.97    | 5.2471 | 12.6929 |
| 26 | 1 | 976  | 9.8661  | 5.2598 | 10.3859 |
| 27 | 0 | 824  | 9.2541  | 5.2658 | 10.0934 |
| 28 | 1 | 593  | 9.9415  | 5.267  | 10.6509 |
| 29 | 0 | 14   | 8.9384  | 5.2738 | 11.8162 |
| 30 | 0 | 418  | 7.5355  | 5.2809 | 11.907  |
| 31 | 1 | 2318 | 7.1993  | 5.2818 | 10.1436 |
| 32 | 0 | 1097 | 9.9432  | 5.3203 | 11.3149 |
| 33 | 1 | 1046 | 9.1869  | 5.327  | 12.5104 |
| 34 | 0 | 910  | 7.4292  | 5.3358 | 12.0693 |
| 35 | 1 | 2681 | 8.4556  | 5.3407 | 10.5098 |
| 36 | 0 | 414  | 10.909  | 5.3501 | 10.4266 |
| 37 | 1 | 97   | 6.5546  | 5.3589 | 11.2558 |
| 38 | 1 | 38   | 8.7724  | 5.3641 | 12.048  |
| 39 | 0 | 540  | 6.9995  | 5.3738 | 10.7245 |
| 40 | 0 | 739  | 8.7076  | 5.3766 | 12.8219 |
| 41 | 0 | 1289 | 4.4221  | 5.388  | 11.9635 |
| 42 | 0 | 546  | 7.5537  | 5.389  | 11.3609 |
| 43 | 1 | 281  | 7.5852  | 5.3978 | 12.4988 |
| 44 | 1 | 1498 | 8.5171  | 5.4    | 11.2857 |
| 45 | 1 | 807  | 9.2329  | 5.4159 | 13.0062 |
| 46 | 0 | 551  | 8.0076  | 5.4175 | 11.8741 |
| 47 | 1 | 598  | 8.8978  | 5.4302 | 12.1836 |
| 48 | 1 | 1258 | 7.7289  | 5.4545 | 12.3871 |
| 49 | 0 | 287  | 10.4461 | 5.4592 | 11.5422 |
| 50 | 1 | 340  | 10.166  | 5.4638 | 11.316  |

<https://jitc.bmj.com>

|    |   |      |         |        |         |
|----|---|------|---------|--------|---------|
| 1  |   |      |         |        |         |
| 2  | 0 | 467  | 9.3883  | 5.4691 | 12.0466 |
| 3  | 1 | 3361 | 8.9408  | 5.4815 | 10.5866 |
| 4  | 0 | 603  | 8.1417  | 5.4865 | 12.7838 |
| 5  | 1 | 303  | 8.8844  | 5.491  | 10.9861 |
| 6  | 1 | 1073 | 10.2667 | 5.509  | 10.8582 |
| 7  | 0 | 230  | 8.2862  | 5.5121 | 11.0744 |
| 8  | 0 | 1060 | 9.071   | 5.5231 | 10.7477 |
| 9  | 0 | 863  | 7.0589  | 5.5305 | 10.4466 |
| 10 | 1 | 922  | 5.6243  | 5.5307 | 12.5618 |
| 11 | 0 | 1280 | 9.8919  | 5.5645 | 13.4093 |
| 12 | 1 | 0    | 10.0571 | 5.568  | 12.3253 |
| 13 | 0 | 448  | 8.4316  | 5.5692 | 12.1457 |
| 14 | 0 | 536  | 10.224  | 5.5704 | 10.7605 |
| 15 | 0 | 657  | 8.4556  | 5.5768 | 12.3197 |
| 16 | 0 | 426  | 8.0622  | 5.5806 | 11.7352 |
| 17 | 0 | 3940 | 8.5545  | 5.5811 | 11.015  |
| 18 | 0 | 1157 | 8.6104  | 5.5818 | 11.529  |
| 19 | 0 | 610  | 10.12   | 5.5847 | 12.5521 |
| 20 | 1 | 701  | 9.4255  | 5.5878 | 12.9018 |
| 21 | 1 | 760  | 5.6542  | 5.6009 | 11.6    |
| 22 | 1 | 124  | 9.9604  | 5.6022 | 12.3999 |
| 23 | 1 | 58   | 8.8829  | 5.6207 | 11.6867 |
| 24 | 0 | 36   | 12.2577 | 5.6277 | 12.1221 |
| 25 | 0 | 977  | 8.5401  | 5.6449 | 12.6651 |
| 26 | 1 | 118  | 7.3243  | 5.6569 | 11.4903 |
| 27 | 0 | 592  | 10.3667 | 5.6618 | 11.0295 |
| 28 | 1 | 321  | 10.2907 | 5.6622 | 11.6757 |
| 29 | 0 | 44   | 7.7687  | 5.6631 | 11.2289 |
| 30 | 1 | 896  | 8.3146  | 5.667  | 11.4584 |
| 31 | 0 | 3674 | 8.0719  | 5.6787 | 14.789  |
| 32 | 0 | 653  | 11.0586 | 5.6836 | 10.9084 |
| 33 | 0 | 630  | 9.7618  | 5.6989 | 11.0723 |
| 34 | 0 | 2696 | 10.4316 | 5.7223 | 12.6253 |
| 35 | 0 | 505  | 7.6496  | 5.7248 | 13.8185 |
| 36 | 0 | 791  | 9.8888  | 5.727  | 12.03   |
| 37 | 1 | 116  | 9.7038  | 5.7311 | 10.7146 |
| 38 | 0 | 578  | 9.8152  | 5.7512 | 13.2545 |
| 39 | 0 | 448  | 8.648   | 5.756  | 11.6741 |
| 40 | 1 | 1622 | 7.0431  | 5.7586 | 11.2899 |
| 41 | 0 | 791  | 7.7058  | 5.7721 | 12.6442 |
| 42 | 1 | 22   | 8.1452  | 5.7772 | 11.9816 |
| 43 | 1 | 257  | 8.6231  | 5.7838 | 12.76   |
| 44 | 0 | 426  | 7.8949  | 5.791  | 12.781  |
| 45 | 0 | 285  | 11.0331 | 5.7931 | 12.6515 |
| 46 | 1 | 1043 | 11.4816 | 5.816  | 10.873  |
| 47 | 1 | 488  | 6.4996  | 5.8311 | 12.7799 |
| 48 | 1 | 808  | 8.3214  | 5.8386 | 11.818  |
| 49 | 1 | 210  | 8.1918  | 5.8435 | 11.2745 |
| 50 | 1 | 468  | 6.6736  | 5.8452 | 12.229  |

<https://jitc.bmj.com>

|    |   |      |         |        |         |
|----|---|------|---------|--------|---------|
| 1  |   |      |         |        |         |
| 2  | 0 | 139  | 8.8852  | 5.862  | 11.8702 |
| 3  | 0 | 435  | 9.1252  | 5.8682 | 13.1286 |
| 4  | 0 | 424  | 8.9553  | 5.8717 | 9.2168  |
| 5  | 1 | 87   | 12.4908 | 5.8802 | 11.5743 |
| 6  | 1 | 291  | 7.1766  | 5.884  | 9.2     |
| 7  | 0 | 1163 | 8.7813  | 5.8886 | 12.9899 |
| 8  | 0 | 264  | 11.3102 | 5.9026 | 11.7475 |
| 9  | 0 | 2065 | 9.2741  | 5.9118 | 12.2945 |
| 10 | 0 | 896  | 9.9649  | 5.9245 | 12.7173 |
| 11 | 1 | 694  | 7.9212  | 5.9305 | 12.2129 |
| 12 | 1 | 628  | 11.9746 | 5.9535 | 12.5578 |
| 13 | 0 | 7248 | 6.8712  | 5.9608 | 8.8924  |
| 14 | 0 | 446  | 6.2454  | 5.9657 | 11.0771 |
| 15 | 1 | 460  | 9.2029  | 5.9674 | 13.4044 |
| 16 | 0 | 704  | 6.8468  | 5.9682 | 11.5843 |
| 17 | 1 | 1081 | 10.3308 | 5.9685 | 11.9585 |
| 18 | 0 | 610  | 7.7661  | 5.9838 | 11.8697 |
| 19 | 1 | 91   | 10.2025 | 5.9925 | 11.5151 |
| 20 | 1 | 300  | 10.7319 | 6.0221 | 11.3324 |
| 21 | 1 | 949  | 4.1746  | 6.0296 | 11.2834 |
| 22 | 0 | 476  | 7.4017  | 6.0328 | 10.905  |
| 23 | 1 | 244  | 12.3307 | 6.0444 | 12.072  |
| 24 | 0 | 1216 | 8.5747  | 6.0521 | 11.4552 |
| 25 | 0 | 690  | 7.3167  | 6.0577 | 12.1712 |
| 26 | 1 | 574  | 11.0805 | 6.0647 | 12.602  |
| 27 | 0 | 2488 | 8.9263  | 6.0943 | 12.6458 |
| 28 | 1 | 193  | 11.0814 | 6.0957 | 10.3467 |
| 29 | 0 | 791  | 8.6362  | 6.1137 | 14.0828 |
| 30 | 0 | 866  | 8.6665  | 6.1157 | 13.4697 |
| 31 | 0 | 691  | 9.0543  | 6.1243 | 11.524  |
| 32 | 0 | 323  | 12.2953 | 6.1298 | 12.7026 |
| 33 | 0 | 888  | 7.64    | 6.1496 | 12.9769 |
| 34 | 1 | 1147 | 8.3458  | 6.1507 | 12.9037 |
| 35 | 0 | 596  | 7.8165  | 6.1531 | 11.7211 |
| 36 | 0 | 260  | 7.452   | 6.1572 | 11.4641 |
| 37 | 0 | 913  | 10.0079 | 6.1607 | 13.1415 |
| 38 | 0 | 2067 | 10.0338 | 6.1716 | 11.5869 |
| 39 | 1 | 478  | 4.5992  | 6.1752 | 10.1854 |
| 40 | 0 | 1324 | 8.3256  | 6.1897 | 11.7617 |
| 41 | 1 | 258  | 9.7379  | 6.203  | 10.8977 |
| 42 | 1 | 376  | 8.2623  | 6.2074 | 12.3127 |
| 43 | 0 | 603  | 6.9433  | 6.2104 | 11.1931 |
| 44 | 0 | 3261 | 8.4385  | 6.2313 | 11.8908 |
| 45 | 0 | 466  | 10.2594 | 6.2328 | 12.2448 |
| 46 | 1 | 282  | 10.8458 | 6.2359 | 12.7854 |
| 47 | 0 | 2368 | 9.1151  | 6.2368 | 11.3956 |
| 48 | 1 | 1516 | 8.5056  | 6.2446 | 12.4264 |
| 49 | 1 | 737  | 10.3586 | 6.2452 | 12.3554 |
| 50 | 0 | 1974 | 8.8744  | 6.2466 | 10.7211 |

<https://jitc.bmj.com>

|    |   |      |         |        |         |
|----|---|------|---------|--------|---------|
| 1  |   |      |         |        |         |
| 2  | 0 | 1079 | 10.7568 | 6.249  | 11.6474 |
| 3  | 0 | 24   | 11.1578 | 6.2557 | 11.7363 |
| 4  | 0 | 1847 | 9.0031  | 6.2682 | 10.5348 |
| 5  | 0 | 600  | 11.649  | 6.2696 | 12.2341 |
| 6  | 0 | 740  | 8.7457  | 6.2724 | 11.9351 |
| 7  | 1 | 1167 | 10.3796 | 6.2851 | 11.7555 |
| 8  | 1 | 719  | 8.9421  | 6.2859 | 13.1347 |
| 9  | 0 | 1965 | 9.1941  | 6.2941 | 11.9116 |
| 10 | 1 | 1798 | 8.6284  | 6.3036 | 12.7614 |
| 11 | 1 | 336  | 8.3065  | 6.3084 | 13.0838 |
| 12 | 0 | 48   | 9.98    | 6.3085 | 11.0031 |
| 13 | 1 | 336  | 10.6842 | 6.3093 | 11.3396 |
| 14 | 0 | 515  | 10.9129 | 6.3097 | 12.0468 |
| 15 | 1 | 139  | 9.1524  | 6.3146 | 11.2031 |
| 16 | 0 | 13   | 9.658   | 6.3282 | 13.1639 |
| 17 | 0 | 141  | 8.6029  | 6.3426 | 12.5401 |
| 18 | 0 | 718  | 8.6258  | 6.3584 | 10.8663 |
| 19 | 0 | 1523 | 8.9358  | 6.3712 | 11.9628 |
| 20 | 0 | 578  | 10.0682 | 6.3801 | 13.4365 |
| 21 | 1 | 905  | 7.8839  | 6.3925 | 12.4804 |
| 22 | 0 | 2595 | 12.2229 | 6.4123 | 12.6275 |
| 23 | 0 | 1621 | 10.4027 | 6.4203 | 12.6426 |
| 24 | 1 | 950  | 8.5923  | 6.4302 | 12.2711 |
| 25 | 0 | 610  | 12.5927 | 6.4428 | 12.8148 |
| 26 | 1 | 167  | 9.4642  | 6.4505 | 12.4665 |
| 27 | 0 | 481  | 4.7399  | 6.4508 | 9.8904  |
| 28 | 0 | 4992 | 8.2141  | 6.4553 | 12.4964 |
| 29 | 1 | 656  | 10.8186 | 6.4612 | 11.462  |
| 30 | 0 | 1013 | 10.9489 | 6.4647 | 10.8069 |
| 31 | 0 | 310  | 11.0909 | 6.4754 | 11.8415 |
| 32 | 0 | 705  | 9.1366  | 6.4812 | 13.2278 |
| 33 | 1 | 999  | 10.756  | 6.4814 | 12.7528 |
| 34 | 1 | 1178 | 10.9292 | 6.4829 | 11.9239 |
| 35 | 1 | 244  | 8.1693  | 6.4884 | 12.444  |
| 36 | 0 | 3305 | 7.697   | 6.4899 | 11.9831 |
| 37 | 0 | 775  | 9.8145  | 6.4926 | 12.2656 |
| 38 | 1 | 2393 | 11.6951 | 6.4966 | 13.1821 |
| 39 | 0 | 7062 | 10.1022 | 6.5148 | 12.0537 |
| 40 | 0 | 1175 | 8.0142  | 6.5205 | 11.4543 |
| 41 | 1 | 1600 | 10.4797 | 6.5311 | 13.0389 |
| 42 | 0 | 864  | 10.0597 | 6.5338 | 9.9836  |
| 43 | 0 | 605  | 9.6388  | 6.535  | 11.2576 |
| 44 | 1 | 189  | 11.5047 | 6.5386 | 12.4113 |
| 45 | 0 | 728  | 7.8156  | 6.5401 | 12.125  |
| 46 | 0 | 997  | 8.3434  | 6.5419 | 12.2211 |
| 47 | 0 | 930  | 12.4727 | 6.557  | 12.1788 |
| 48 | 0 | 422  | 11.2748 | 6.5583 | 11.6555 |
| 49 | 0 | 218  | 10.5463 | 6.5761 | 12.2442 |
| 50 | 0 | 827  | 5.4251  | 6.5872 | 10.1961 |

<https://jitc.bmj.com>

|    |   |      |         |        |         |
|----|---|------|---------|--------|---------|
| 1  |   |      |         |        |         |
| 2  | 0 | 670  | 9.9428  | 6.5896 | 12.2405 |
| 3  | 0 | 1479 | 11.139  | 6.5929 | 11.5209 |
| 4  | 1 | 164  | 10.9002 | 6.5931 | 11.8805 |
| 5  | 0 | 1189 | 11.4578 | 6.6041 | 10.5611 |
| 6  | 0 | 634  | 9.1968  | 6.6414 | 12.9135 |
| 7  | 1 | 274  | 11.3175 | 6.6445 | 13.5822 |
| 8  | 0 | 626  | 8.7409  | 6.6495 | 13.1362 |
| 9  | 0 | 476  | 8.9075  | 6.6764 | 11.1482 |
| 10 | 0 | 520  | 7.6557  | 6.6765 | 11.9872 |
| 11 | 0 | 499  | 8.2604  | 6.6767 | 13.532  |
| 12 | 0 | 658  | 9.2343  | 6.6767 | 12.1271 |
| 13 | 0 | 35   | 9.7515  | 6.7066 | 12.8693 |
| 14 | 0 | 845  | 10.5284 | 6.7342 | 11.437  |
| 15 | 0 | 60   | 10.6105 | 6.7381 | 12.7416 |
| 16 | 0 | 427  | 11.7554 | 6.7396 | 12.2995 |
| 17 | 0 | 1728 | 10.7929 | 6.7439 | 11.6045 |
| 18 | 0 | 531  | 9.9049  | 6.7459 | 11.3317 |
| 19 | 1 | 869  | 11.0889 | 6.7469 | 11.4534 |
| 20 | 0 | 761  | 10.1288 | 6.7487 | 12.5596 |
| 21 | 1 | 626  | 9.6859  | 6.7605 | 11.6134 |
| 22 | 0 | 1285 | 10.0863 | 6.7618 | 11.6006 |
| 23 | 0 | 477  | 10.9749 | 6.7625 | 11.5828 |
| 24 | 0 | 385  | 11.0229 | 6.7696 | 11.3023 |
| 25 | 0 | 944  | 9.4757  | 6.7698 | 11.903  |
| 26 | 0 | 601  | 8.6524  | 6.7834 | 12.6116 |
| 27 | 0 | 629  | 10.9764 | 6.8002 | 11.9983 |
| 28 | 1 | 1421 | 9.7199  | 6.8035 | 11.994  |
| 29 | 0 | 151  | 7.8336  | 6.8119 | 13.0466 |
| 30 | 1 | 1357 | 10.3428 | 6.8156 | 12.3754 |
| 31 | 1 | 464  | 11.7663 | 6.8257 | 12.8689 |
| 32 | 1 | 1194 | 9.785   | 6.8301 | 12.5033 |
| 33 | 0 | 938  | 9.9183  | 6.8302 | 11.7845 |
| 34 | 1 | 1653 | 9.0761  | 6.8398 | 11.9351 |
| 35 | 1 | 557  | 10.8699 | 6.8493 | 12.8688 |
| 36 | 1 | 777  | 12.2206 | 6.8548 | 13.2534 |
| 37 | 0 | 423  | 10.3169 | 6.862  | 11.9328 |
| 38 | 0 | 372  | 11.3045 | 6.8626 | 11.3137 |
| 39 | 0 | 409  | 11.0971 | 6.8722 | 11.8728 |
| 40 | 0 | 761  | 11.0657 | 6.8769 | 12.7046 |
| 41 | 1 | 161  | 5.6356  | 6.8898 | 10.5469 |
| 42 | 0 | 988  | 8.9152  | 6.8903 | 11.5503 |
| 43 | 1 | 1197 | 7.0756  | 6.8986 | 12.7094 |
| 44 | 0 | 609  | 9.8569  | 6.9105 | 11.6307 |
| 45 | 1 | 1499 | 11.5811 | 6.9154 | 12.043  |
| 46 | 1 | 614  | 11.5982 | 6.9213 | 12.2823 |
| 47 | 0 | 813  | 11.2744 | 6.9348 | 14.6181 |
| 48 | 1 | 74   | 12.3116 | 6.9363 | 12.0534 |
| 49 | 0 | 2973 | 10.2242 | 6.9484 | 13.2529 |
| 50 | 1 | 1215 | 9.8545  | 6.9491 | 11.4195 |

<https://jitc.bmj.com>



|    |   |      |         |        |         |
|----|---|------|---------|--------|---------|
| 1  |   |      |         |        |         |
| 2  | 1 | 624  | 10.4482 | 6.9758 | 11.4551 |
| 3  | 1 | 4961 | 7.4994  | 6.98   | 12.0098 |
| 4  | 1 | 1135 | 8.9557  | 6.9815 | 11.0668 |
| 5  | 1 | 586  | 11.09   | 6.984  | 11.2942 |
| 6  | 0 | 202  | 5.5803  | 6.9906 | 10.2966 |
| 7  | 0 | 50   | 11.7649 | 7.0032 | 11.5849 |
| 8  | 0 | 224  | 12.5549 | 7.0033 | 12.7611 |
| 9  | 0 | 11   | 10.3191 | 7.0092 | 11.9602 |
| 10 | 0 | 730  | 10.9742 | 7.0123 | 13.6415 |
| 11 | 0 | 607  | 11.7174 | 7.0195 | 13.7568 |
| 12 | 0 | 1442 | 12.6111 | 7.0215 | 12.8528 |
| 13 | 0 | 1189 | 9.3568  | 7.0275 | 11.4397 |
| 14 | 0 | 1272 | 11.348  | 7.0413 | 11.7859 |
| 15 | 1 | 307  | 8.2057  | 7.0562 | 11.3343 |
| 16 | 0 | 830  | 9.68    | 7.0614 | 11.9395 |
| 17 | 0 | 484  | 9.3512  | 7.069  | 11.9219 |
| 18 | 0 | 1333 | 9.3503  | 7.0724 | 12.1882 |
| 19 | 1 | 582  | 10.7113 | 7.0739 | 12.8021 |
| 20 | 0 | 608  | 10.6142 | 7.0933 | 11.1163 |
| 21 | 0 | 591  | 11.6066 | 7.0972 | 11.6968 |
| 22 | 0 | 573  | 8.6801  | 7.1005 | 12.3226 |
| 23 | 0 | 829  | 9.4586  | 7.1013 | 12.4811 |
| 24 | 0 | 385  | 10.9332 | 7.1118 | 12.4259 |
| 25 | 0 | 184  | 11.8735 | 7.1265 | 13.0351 |
| 26 | 0 | 353  | 12.4824 | 7.1401 | 13.0364 |
| 27 | 0 | 2449 | 10.5063 | 7.1486 | 11.7711 |
| 28 | 1 | 428  | 11.7994 | 7.1629 | 12.7282 |
| 29 | 0 | 435  | 9.9982  | 7.1693 | 15.0999 |
| 30 | 1 | 3169 | 10.4294 | 7.1706 | 11.7011 |
| 31 | 0 | 1130 | 11.5311 | 7.1787 | 12.6729 |
| 32 | 0 | 2360 | 10.6434 | 7.1901 | 12.3846 |
| 33 | 1 | 1790 | 9.7277  | 7.1963 | 11.6615 |
| 34 | 1 | 864  | 12.1617 | 7.1968 | 13.8616 |
| 35 | 0 | 3759 | 10.2748 | 7.1983 | 12.4678 |
| 36 | 0 | 651  | 10.5009 | 7.2037 | 11.1444 |
| 37 | 0 | 862  | 9.1094  | 7.2172 | 11.4578 |
| 38 | 1 | 444  | 9.3733  | 7.2215 | 11.2438 |
| 39 | 0 | 669  | 12.0882 | 7.222  | 12.5901 |
| 40 | 0 | 2515 | 10.1298 | 7.2432 | 12.2548 |
| 41 | 0 | 568  | 11.243  | 7.2617 | 11.9188 |
| 42 | 1 | 308  | 11.032  | 7.2683 | 11.4584 |
| 43 | 0 | 904  | 12.4804 | 7.2709 | 12.1348 |
| 44 | 0 | 165  | 10.1304 | 7.2836 | 12.1653 |
| 45 | 0 | 4765 | 10.1464 | 7.2916 | 12.6934 |
| 46 | 1 | 677  | 9.5631  | 7.2929 | 11.251  |
| 47 | 0 | 567  | 10.8833 | 7.3169 | 11.3575 |
| 48 | 0 | 415  | 13.6443 | 7.3215 | 12.5289 |
| 49 | 1 | 171  | 12.4604 | 7.3348 | 12.6092 |
| 50 | 0 | 2823 | 9.652   | 7.3398 | 11.6916 |

<https://jitc.bmj.com>



|    |   |      |         |        |         |
|----|---|------|---------|--------|---------|
| 1  |   |      |         |        |         |
| 2  | 0 | 595  | 12.11   | 7.3406 | 12.4337 |
| 3  | 1 | 385  | 9.0134  | 7.3565 | 11.7048 |
| 4  | 0 | 552  | 11.4726 | 7.3613 | 12.2841 |
| 5  | 0 | 824  | 14.028  | 7.3672 | 12.5915 |
| 6  | 1 | 19   | 12.1883 | 7.3745 | 13.1162 |
| 7  | 0 | 882  | 13.0641 | 7.3764 | 13.3274 |
| 8  | 0 | 2224 | 10.5797 | 7.3821 | 13.0995 |
| 9  | 1 | 952  | 11.3649 | 7.3944 | 12.5415 |
| 10 | 0 | 3635 | 7.8225  | 7.3978 | 10.9941 |
| 11 | 1 | 697  | 12.0819 | 7.3994 | 12.9648 |
| 12 | 1 | 154  | 12.4306 | 7.4136 | 11.9766 |
| 13 | 0 | 565  | 9.9574  | 7.4441 | 10.0491 |
| 14 | 0 | 1683 | 10.2592 | 7.4565 | 12.863  |
| 15 | 1 | 409  | 10.6137 | 7.4606 | 10.8125 |
| 16 | 0 | 1233 | 12.6434 | 7.4746 | 11.9233 |
| 17 | 0 | 186  | 13.562  | 7.4845 | 12.4657 |
| 18 | 0 | 537  | 11.2775 | 7.5228 | 12.0538 |
| 19 | 1 | 995  | 10.7618 | 7.5265 | 12.0635 |
| 20 | 1 | 1293 | 13.1612 | 7.5338 | 12.6792 |
| 21 | 1 | 434  | 8.423   | 7.5366 | 12.8506 |
| 22 | 0 | 487  | 11.0386 | 7.5388 | 11.5248 |
| 23 | 0 | 415  | 8.6454  | 7.5392 | 12.8706 |
| 24 | 1 | 2027 | 12.966  | 7.5396 | 12.59   |
| 25 | 0 | 492  | 11.0717 | 7.5447 | 12.6715 |
| 26 | 0 | 701  | 12.0637 | 7.545  | 12.4052 |
| 27 | 0 | 626  | 10.878  | 7.5617 | 12.201  |
| 28 | 0 | 1870 | 10.2729 | 7.5755 | 14.0826 |
| 29 | 0 | 6732 | 11.4106 | 7.5766 | 9.7187  |
| 30 | 1 | 826  | 7.0875  | 7.5796 | 11.947  |
| 31 | 1 | 987  | 10.5151 | 7.5806 | 14.1155 |
| 32 | 0 | 617  | 8.0325  | 7.5915 | 11.5129 |
| 33 | 0 | 486  | 13.2719 | 7.6453 | 12.3892 |
| 34 | 0 | 1125 | 10.8579 | 7.6459 | 12.0727 |
| 35 | 1 | 187  | 10.8792 | 7.6503 | 10.6218 |
| 36 | 0 | 455  | 11.4632 | 7.6566 | 12.2452 |
| 37 | 1 | 929  | 11.2876 | 7.6594 | 12.6004 |
| 38 | 0 | 1559 | 11.3175 | 7.6648 | 12.1907 |
| 39 | 0 | 225  | 11.1756 | 7.6796 | 13.3836 |
| 40 | 0 | 411  | 11.9987 | 7.6833 | 12.0848 |
| 41 | 0 | 652  | 10.0534 | 7.6917 | 11.9815 |
| 42 | 1 | 1288 | 13.1597 | 7.7122 | 13.0899 |
| 43 | 0 | 852  | 9.7286  | 7.7171 | 11.8232 |
| 44 | 0 | 805  | 10.4913 | 7.725  | 13.728  |
| 45 | 0 | 689  | 10.791  | 7.7256 | 11.3715 |
| 46 | 1 | 761  | 11.9335 | 7.7278 | 12.82   |
| 47 | 1 | 653  | 11.6777 | 7.7476 | 11.6347 |
| 48 | 0 | 1431 | 11.4627 | 7.7613 | 12.6063 |
| 49 | 0 | 513  | 11.4941 | 7.763  | 11.9562 |
| 50 | 0 | 1071 | 9.0904  | 7.7745 | 10.7537 |

<https://jitc.bmj.com>

|    |   |      |         |        |         |
|----|---|------|---------|--------|---------|
| 1  |   |      |         |        |         |
| 2  | 1 | 469  | 11.9603 | 7.7827 | 12.8621 |
| 3  | 0 | 15   | 11.4459 | 7.7899 | 11.1088 |
| 4  | 1 | 457  | 12.0338 | 7.7908 | 13.6438 |
| 5  | 0 | 553  | 12.269  | 7.8208 | 12.2123 |
| 6  | 1 | 2620 | 11.7675 | 7.8222 | 12.0046 |
| 7  | 0 | 515  | 11.1019 | 7.8303 | 13.9348 |
| 8  | 0 | 133  | 11.5681 | 7.8303 | 12.7144 |
| 9  | 0 | 599  | 13.2655 | 7.8343 | 13.6459 |
| 10 | 1 | 375  | 11.9157 | 7.8505 | 11.8804 |
| 11 | 1 | 1265 | 9.544   | 7.8579 | 12.6509 |
| 12 | 0 | 651  | 10.9498 | 7.8737 | 11.7453 |
| 13 | 1 | 500  | 13.0716 | 7.893  | 12.8338 |
| 14 | 0 | 578  | 9.7011  | 7.8981 | 10.3646 |
| 15 | 1 | 1498 | 13.5008 | 7.9006 | 12.2542 |
| 16 | 0 | 947  | 9.7531  | 7.9017 | 11.3985 |
| 17 | 0 | 624  | 9.7821  | 7.9033 | 13.6508 |
| 18 | 0 | 351  | 12.1249 | 7.9159 | 12.8566 |
| 19 | 0 | 1429 | 12.8015 | 7.9166 | 13.4033 |
| 20 | 0 | 365  | 11.1493 | 7.9176 | 12.2978 |
| 21 | 0 | 1864 | 13.2291 | 7.9233 | 13.9429 |
| 22 | 0 | 791  | 11.3019 | 7.936  | 12.2727 |
| 23 | 0 | 1119 | 8.9547  | 7.9363 | 13.7355 |
| 24 | 0 | 547  | 10.3487 | 7.9382 | 11.4039 |
| 25 | 0 | 605  | 13.2669 | 7.9526 | 12.7895 |
| 26 | 1 | 243  | 9.8185  | 7.9551 | 13.0956 |
| 27 | 0 | 545  | 10.9304 | 7.9643 | 12.4284 |
| 28 | 0 | 457  | 13.5852 | 7.9699 | 13.6321 |
| 29 | 1 | 1229 | 11.2058 | 7.9813 | 11.1184 |
| 30 | 0 | 747  | 11.8361 | 7.992  | 12.2807 |
| 31 | 1 | 1209 | 10.7773 | 7.9923 | 14.2326 |
| 32 | 0 | 2109 | 10.0417 | 8.0079 | 12.0209 |
| 33 | 1 | 1778 | 8.5326  | 8.0103 | 12.4858 |
| 34 | 0 | 1700 | 11.0206 | 8.0244 | 11.2703 |
| 35 | 1 | 121  | 11.7447 | 8.0441 | 12.5684 |
| 36 | 0 | 84   | 11.1006 | 8.0444 | 11.5869 |
| 37 | 0 | 1239 | 11.2979 | 8.0455 | 12.4297 |
| 38 | 1 | 33   | 11.5955 | 8.0562 | 12.1137 |
| 39 | 1 | 702  | 14.4775 | 8.0614 | 13.446  |
| 40 | 1 | 995  | 11.1882 | 8.0778 | 12.8441 |
| 41 | 0 | 658  | 10.8769 | 8.0812 | 12.6199 |
| 42 | 1 | 1026 | 12.0083 | 8.0817 | 12.5384 |
| 43 | 0 | 1159 | 12.0046 | 8.1444 | 13.2227 |
| 44 | 0 | 134  | 12.3381 | 8.1572 | 13.4948 |
| 45 | 1 | 268  | 12.1871 | 8.1652 | 11.8012 |
| 46 | 0 | 1305 | 13.2848 | 8.1698 | 12.1472 |
| 47 | 1 | 176  | 14.0599 | 8.1813 | 12.9457 |
| 48 | 0 | 993  | 10.7622 | 8.183  | 12.1648 |
| 49 | 0 | 416  | 9.6175  | 8.188  | 13.8249 |
| 50 | 0 | 522  | 10.8534 | 8.1991 | 12.8815 |

<https://jitc.bmj.com>

|    |   |      |         |        |         |
|----|---|------|---------|--------|---------|
| 1  |   |      |         |        |         |
| 2  | 0 | 1474 | 13.2737 | 8.2305 | 12.9023 |
| 3  | 0 | 719  | 11.637  | 8.2368 | 13.039  |
| 4  | 1 | 2174 | 11.4475 | 8.2373 | 13.4716 |
| 5  | 1 | 339  | 12.4932 | 8.2523 | 12.5889 |
| 6  | 0 | 1400 | 11.9454 | 8.2571 | 13.2166 |
| 7  | 1 | 173  | 9.8974  | 8.2713 | 11.655  |
| 8  | 0 | 741  | 10.3152 | 8.2742 | 11.7917 |
| 9  | 0 | 1369 | 11.5938 | 8.2857 | 12.4425 |
| 10 | 0 | 1367 | 11.0649 | 8.3029 | 11.7747 |
| 11 | 1 | 237  | 13.5438 | 8.3102 | 13.3908 |
| 12 | 0 | 129  | 12.7263 | 8.3443 | 13.1601 |
| 13 | 0 | 664  | 11.448  | 8.3501 | 12.5781 |
| 14 | 0 | 704  | 10.1531 | 8.3515 | 14.3938 |
| 15 | 1 | 442  | 9.4556  | 8.3614 | 10.9463 |
| 16 | 0 | 539  | 11.4262 | 8.3754 | 13.3554 |
| 17 | 0 | 28   | 11.679  | 8.3797 | 12.1426 |
| 18 | 1 | 855  | 12.2453 | 8.408  | 12.0656 |
| 19 | 0 | 377  | 13.1159 | 8.4215 | 12.4752 |
| 20 | 1 | 370  | 7.4391  | 8.4231 | 13.1074 |
| 21 | 0 | 526  | 11.6073 | 8.4465 | 11.3137 |
| 22 | 0 | 603  | 13.6539 | 8.4741 | 13.0853 |
| 23 | 0 | 534  | 13.4036 | 8.4803 | 12.8958 |
| 24 | 1 | 1531 | 13.1286 | 8.5322 | 12.055  |
| 25 | 0 | 476  | 12.1309 | 8.5343 | 12.4998 |
| 26 | 0 | 2067 | 13.9121 | 8.5349 | 13.7161 |
| 27 | 0 | 889  | 13.6416 | 8.5376 | 13.2541 |
| 28 | 0 | 182  | 11.6711 | 8.5393 | 12.5239 |
| 29 | 0 | 1036 | 13.7828 | 8.5673 | 13.0003 |
| 30 | 1 | 321  | 12.1068 | 8.6011 | 12.7405 |
| 31 | 0 | 1118 | 13.6144 | 8.6275 | 13.5001 |
| 32 | 0 | 674  | 13.2    | 8.6556 | 13.4689 |
| 33 | 1 | 800  | 11.9427 | 8.6589 | 12.7025 |
| 34 | 1 | 2617 | 12.9757 | 8.674  | 12.7578 |
| 35 | 0 | 3094 | 14.2278 | 8.7088 | 13.6345 |
| 36 | 1 | 1268 | 11.3949 | 8.7253 | 11.2483 |
| 37 | 0 | 79   | 12.6019 | 8.7326 | 13.3513 |
| 38 | 0 | 800  | 14.0222 | 8.7686 | 13.8397 |
| 39 | 0 | 478  | 10.476  | 8.8301 | 12.4776 |
| 40 | 0 | 614  | 12.7517 | 8.8436 | 13.1829 |
| 41 | 1 | 1830 | 11.3739 | 8.862  | 12.3021 |
| 42 | 0 | 1932 | 12.1067 | 8.8643 | 12.6786 |
| 43 | 0 | 1351 | 12.4645 | 9.0049 | 12.8262 |
| 44 | 0 | 1432 | 12.7723 | 9.0053 | 12.7439 |
| 45 | 0 | 179  | 14.0864 | 9.0079 | 12.5594 |
| 46 | 0 | 568  | 11.2017 | 9.0488 | 12.4617 |
| 47 | 0 | 872  | 11.2986 | 9.0647 | 12.6282 |
| 48 | 0 | 2137 | 12.3636 | 9.0773 | 13.1273 |
| 49 | 1 | 343  | 12.8134 | 9.1273 | 12.3212 |
| 50 | 1 | 879  | 11.4335 | 9.1509 | 11.7011 |

<https://jitc.bmj.com>

|    |   |      |         |         |         |
|----|---|------|---------|---------|---------|
| 1  |   |      |         |         |         |
| 2  | 0 | 683  | 12.1851 | 9.2893  | 12.7996 |
| 3  | 0 | 1893 | 13.5448 | 9.4085  | 13.1619 |
| 4  | 0 | 677  | 12.6369 | 9.4088  | 11.8166 |
| 5  | 1 | 429  | 12.6744 | 9.414   | 13.4081 |
| 6  | 0 | 307  | 14.1091 | 9.4721  | 12.346  |
| 7  | 0 | 44   | 12.4008 | 9.5003  | 12.2931 |
| 8  | 0 | 839  | 13.5499 | 9.9864  | 13.263  |
| 9  | 0 | 354  | 11.675  | 10.9578 | 11.708  |
| 10 |   |      |         |         |         |
| 11 |   |      |         |         |         |
| 12 |   |      |         |         |         |
| 13 |   |      |         |         |         |
| 14 |   |      |         |         |         |
| 15 |   |      |         |         |         |
| 16 |   |      |         |         |         |
| 17 |   |      |         |         |         |
| 18 |   |      |         |         |         |
| 19 |   |      |         |         |         |
| 20 |   |      |         |         |         |
| 21 |   |      |         |         |         |
| 22 |   |      |         |         |         |
| 23 |   |      |         |         |         |
| 24 |   |      |         |         |         |
| 25 |   |      |         |         |         |
| 26 |   |      |         |         |         |
| 27 |   |      |         |         |         |
| 28 |   |      |         |         |         |
| 29 |   |      |         |         |         |
| 30 |   |      |         |         |         |
| 31 |   |      |         |         |         |
| 32 |   |      |         |         |         |
| 33 |   |      |         |         |         |
| 34 |   |      |         |         |         |
| 35 |   |      |         |         |         |
| 36 |   |      |         |         |         |
| 37 |   |      |         |         |         |
| 38 |   |      |         |         |         |
| 39 |   |      |         |         |         |
| 40 |   |      |         |         |         |
| 41 |   |      |         |         |         |
| 42 |   |      |         |         |         |
| 43 |   |      |         |         |         |
| 44 |   |      |         |         |         |
| 45 |   |      |         |         |         |
| 46 |   |      |         |         |         |
| 47 |   |      |         |         |         |
| 48 |   |      |         |         |         |
| 49 |   |      |         |         |         |
| 50 |   |      |         |         |         |
| 51 |   |      |         |         |         |
| 52 |   |      |         |         |         |
| 53 |   |      |         |         |         |
| 54 |   |      |         |         |         |
| 55 |   |      |         |         |         |
| 56 |   |      |         |         |         |
| 57 |   |      |         |         |         |
| 58 |   |      |         |         |         |
| 59 |   |      |         |         |         |
| 60 |   |      |         |         |         |

Confidential: For Review Only

1  
2  
3  
4  
5  
6  
7  
8  
9  
10  
11  
12  
13  
14  
15  
16  
17  
18  
19  
20  
21  
22  
23  
24  
25  
26  
27  
28  
29  
30  
31  
32  
33  
34  
35  
36  
37  
38  
39  
40  
41  
42  
43  
44  
45  
46  
47  
48  
49  
50  
51  
52  
53  
54  
55  
56  
57  
58  
59  
60

| CD8A   | CD8B   |
|--------|--------|
| 1.9953 | 4.1478 |
| 6.7479 | 3.0177 |
| 5.6129 | 4.0045 |
| 2.8561 | 1.3562 |
| 3.7696 | 2.2176 |
| 7.4937 | 3.035  |
| 7.3736 | 5.1175 |
| 5.8216 | 7.2104 |
| 5.3025 | 2.8897 |
| 6.8598 | 6.8438 |
| 5.9055 | 4.1463 |
| 7.5953 | 4.2507 |
| 6.391  | 4.5837 |
| 6.6057 | 3.4908 |
| 4.9649 | 2.8746 |
| 5.2605 | 3.3058 |
| 6.4401 | 4.2301 |
| 7.2992 | 4.9027 |
| 8.6359 | 6.1526 |
| 5.7028 | 3.3351 |
| 6.222  | 4.0327 |
| 6.2933 | 4.6099 |
| 5.7947 | 3.924  |
| 6.2837 | 3.93   |
| 6.6382 | 6.2716 |
| 5.6789 | 4.1798 |
| 7.1723 | 7.6232 |
| 6.4507 | 4.237  |
| 7.5246 | 6.2806 |
| 8.319  | 6.0474 |
| 6.1273 | 3.5732 |
| 5.4799 | 3.9032 |
| 6.7354 | 4.9486 |
| 7.6855 | 5.5459 |
| 5.3698 | 2.836  |
| 6.7127 | 4.6817 |
| 5.3063 | 3.1756 |
| 5.689  | 3.8    |
| 8.6707 | 6.5131 |
| 5.4009 | 3.6084 |
| 6.7592 | 4.4748 |
| 6.5923 | 4.6473 |
| 5.8251 | 3.4562 |
| 6.5162 | 4.9553 |
| 7.4642 | 4.2501 |
| 7.0977 | 4.973  |

<https://jitc.bmj.com>

|    |        |        |
|----|--------|--------|
| 1  | 6.7577 | 4.542  |
| 2  | 6.9364 | 5.2351 |
| 3  | 6.5155 | 5.5191 |
| 4  | 6.8882 | 9.0682 |
| 5  | 5.3761 | 3.6916 |
| 6  | 6.3963 | 4.3099 |
| 7  | 5.9031 | 3.2006 |
| 8  | 6.3023 | 6.653  |
| 9  | 8.1363 | 6.0889 |
| 10 | 5.7015 | 4.2673 |
| 11 | 4.6478 | 2.4763 |
| 12 | 6.9494 | 4.5633 |
| 13 | 6.5931 | 5.0894 |
| 14 | 6.5499 | 4.6664 |
| 15 | 5.6724 | 4.2167 |
| 16 | 5.0831 | 3.3784 |
| 17 | 6.6507 | 4.4401 |
| 18 | 5.7351 | 3.781  |
| 19 | 7.5309 | 7.7056 |
| 20 | 7.7654 | 5.2666 |
| 21 | 4.2377 | 2.576  |
| 22 | 7.5827 | 6.6193 |
| 23 | 6.0503 | 4.8122 |
| 24 | 5.1348 | 8.9957 |
| 25 | 6.5778 | 4.3855 |
| 26 | 8.1794 | 8.7821 |
| 27 | 7.2889 | 4.7006 |
| 28 | 7.4308 | 5.9636 |
| 29 | 6.9648 | 4.7822 |
| 30 | 6.9813 | 5.1394 |
| 31 | 6.402  | 3.5009 |
| 32 | 7.9031 | 5.8082 |
| 33 | 7.8271 | 5.5078 |
| 34 | 6.6561 | 4.7942 |
| 35 | 8.6253 | 6.1286 |
| 36 | 7.9365 | 5.4716 |
| 37 | 8.1632 | 5.7982 |
| 38 | 6.3384 | 3.7703 |
| 39 | 7.5743 | 5.4894 |
| 40 | 5.6621 | 3.8216 |
| 41 | 6.4896 | 4.6827 |
| 42 | 7.9386 | 5.4683 |
| 43 | 7.8585 | 5.1769 |
| 44 | 8.0585 | 7.0016 |
| 45 | 6.1898 | 4.356  |
| 46 | 6.7361 | 4.5612 |
| 47 | 7.7464 | 5.4201 |
| 48 | 9.0348 | 6.2941 |
| 49 | 7.9665 | 5.213  |
| 50 |        |        |
| 51 |        |        |
| 52 |        |        |
| 53 |        |        |
| 54 |        |        |
| 55 |        |        |
| 56 |        |        |
| 57 |        |        |
| 58 |        |        |
| 59 |        |        |
| 60 |        |        |

<https://jitc.bmj.com>

|    |        |        |
|----|--------|--------|
| 1  |        |        |
| 2  | 7.3968 | 4.8105 |
| 3  | 6.6092 | 4.5135 |
| 4  | 6.7543 | 4.8606 |
| 5  | 6.1447 | 3.7958 |
| 6  | 7.6893 | 5.963  |
| 7  | 7.5688 | 8.1499 |
| 8  | 6.3394 | 3.9382 |
| 9  | 6.8251 | 5.5305 |
| 10 | 6.1437 | 4.7561 |
| 11 | 6.2421 | 4.1308 |
| 12 | 7.649  | 5.3855 |
| 13 | 8.0275 | 6.0903 |
| 14 | 7.7422 | 4.9911 |
| 15 | 5.2965 | 3.1144 |
| 16 | 6.4477 | 4.7851 |
| 17 | 6.702  | 4.7504 |
| 18 | 5.5525 | 4.4701 |
| 19 | 7.6114 | 6.2155 |
| 20 | 6.9209 | 4.7247 |
| 21 | 6.4717 | 4.5197 |
| 22 | 7.0368 | 5.1928 |
| 23 | 7.95   | 5.7672 |
| 24 | 7.8468 | 5.4827 |
| 25 | 7.9521 | 5.6862 |
| 26 | 7.617  | 5.0379 |
| 27 | 6.7412 | 7.9729 |
| 28 | 7.7211 | 5.6382 |
| 29 | 7.2177 | 5.6293 |
| 30 | 6.9828 | 6.6481 |
| 31 | 7.8871 | 5.735  |
| 32 | 7.8811 | 6.9886 |
| 33 | 7.0817 | 5.1775 |
| 34 | 7.3698 | 5.0236 |
| 35 | 7.7095 | 6.0455 |
| 36 | 8.2053 | 6.2125 |
| 37 | 7.2501 | 4.3606 |
| 38 | 7.0287 | 4.3276 |
| 39 | 6.3038 | 3.834  |
| 40 | 7.898  | 5.7961 |
| 41 | 6.7589 | 4.8658 |
| 42 | 6.021  | 3.4719 |
| 43 | 6.5963 | 4.0944 |
| 44 | 6.856  | 4.4032 |
| 45 | 7.9341 | 5.7158 |
| 46 | 7.4323 | 6.5013 |
| 47 | 6.7797 | 4.4515 |
| 48 | 8.0708 | 6.1473 |
| 49 | 6.0734 | 4.3377 |
| 50 | 7.0227 | 4.8553 |

|    |        |        |
|----|--------|--------|
| 1  | 7.1603 | 5.3272 |
| 2  | 6.647  | 4.3185 |
| 3  | 9.2268 | 7.5471 |
| 4  | 7.935  | 5.3074 |
| 5  | 6.8396 | 4.5492 |
| 6  | 8.1523 | 6.7953 |
| 7  | 9.3886 | 7.4533 |
| 8  | 7.5734 | 5.5048 |
| 9  | 8.0095 | 5.0417 |
| 10 | 5.7042 | 4.1113 |
| 11 | 8.7868 | 7.7488 |
| 12 | 7.6334 | 5.3835 |
| 13 | 4.5846 | 2.9913 |
| 14 | 6.0884 | 4.2833 |
| 15 | 7.2125 | 8.4435 |
| 16 | 8.7417 | 7.171  |
| 17 | 7.9969 | 5.2267 |
| 18 | 8.7567 | 5.9824 |
| 19 | 7.1542 | 5.632  |
| 20 | 6.4312 | 4.0868 |
| 21 | 6.8182 | 5.1909 |
| 22 | 7.8977 | 5.3992 |
| 23 | 6.9314 | 4.9866 |
| 24 | 7.1645 | 4.7234 |
| 25 | 8.3189 | 5.7149 |
| 26 | 5.1273 | 3.553  |
| 27 | 8.6529 | 5.8082 |
| 28 | 6.867  | 4.5848 |
| 29 | 7.1617 | 4.5233 |
| 30 | 7.1749 | 4.4546 |
| 31 | 8.9467 | 6.2935 |
| 32 | 6.351  | 4.6222 |
| 33 | 7.306  | 5.762  |
| 34 | 6.2272 | 4.8771 |
| 35 | 7.1094 | 4.0857 |
| 36 | 8.3257 | 6.639  |
| 37 | 7.4544 | 5.552  |
| 38 | 7.1495 | 5.1005 |
| 39 | 7.0921 | 4.8172 |
| 40 | 6.8966 | 4.5959 |
| 41 | 6.1432 | 3.9007 |
| 42 | 6.0417 | 3.3407 |
| 43 | 7.3428 | 4.7636 |
| 44 | 7.2718 | 5.3181 |
| 45 | 9.1193 | 6.5743 |
| 46 | 7.9807 | 6.647  |
| 47 | 6.2594 | 3.833  |
| 48 | 8.1811 | 6.0175 |
| 49 | 7.5781 | 7.743  |

<https://jitc.bmj.com>



|    |         |        |
|----|---------|--------|
| 1  |         |        |
| 2  | 8.3411  | 6.0829 |
| 3  | 7.3542  | 4.6612 |
| 4  | 8.0742  | 5.722  |
| 5  | 7.1038  | 4.4099 |
| 6  | 7.4015  | 5.1995 |
| 7  | 5.9811  | 3.6514 |
| 8  | 7.565   | 5.8751 |
| 9  | 6.9075  | 5.0423 |
| 10 | 6.6306  | 4.6394 |
| 11 | 6.3544  | 4.1953 |
| 12 | 7.648   | 5.9026 |
| 13 | 7.449   | 5.467  |
| 14 | 7.993   | 5.729  |
| 15 | 6.6672  | 7.5556 |
| 16 | 6.8426  | 4.6393 |
| 17 | 8.1905  | 6.3215 |
| 18 | 6.6957  | 4.445  |
| 19 | 6.9276  | 5.3773 |
| 20 | 7.1322  | 5.3291 |
| 21 | 5.5345  | 2.9851 |
| 22 | 7.0922  | 5.261  |
| 23 | 7.8856  | 5.5247 |
| 24 | 8.8286  | 6.824  |
| 25 | 8.5329  | 6.4643 |
| 26 | 7.2508  | 4.9945 |
| 27 | 4.8768  | 7.2996 |
| 28 | 8.5877  | 6.9539 |
| 29 | 9.3404  | 7.1219 |
| 30 | 8.2214  | 5.9637 |
| 31 | 6.8579  | 7.9982 |
| 32 | 7.1936  | 4.9202 |
| 33 | 10.3526 | 9.1142 |
| 34 | 7.5941  | 9.3607 |
| 35 | 6.9463  | 4.8812 |
| 36 | 8.5539  | 6.1568 |
| 37 | 7.9549  | 5.9196 |
| 38 | 7.5837  | 5.0728 |
| 39 | 7.9667  | 5.4267 |
| 40 | 7.7501  | 5.6715 |
| 41 | 8.4664  | 6.0194 |
| 42 | 8.6598  | 6.3433 |
| 43 | 8.634   | 7.1065 |
| 44 | 8.169   | 5.8316 |
| 45 | 6.7781  | 4.5858 |
| 46 | 7.8545  | 5.5663 |
| 47 | 8.209   | 6.1673 |
| 48 | 9.129   | 6.9783 |
| 49 | 7.9429  | 5.7933 |
| 50 | 4.9695  | 2.8545 |

|    |        |        |
|----|--------|--------|
| 1  |        |        |
| 2  | 8.4702 | 6.0867 |
| 3  | 8.4188 | 6.4741 |
| 4  | 7.7284 | 5.4039 |
| 5  | 8.4603 | 6.7284 |
| 6  | 7.1122 | 4.9417 |
| 7  | 8.9393 | 7.0798 |
| 8  | 7.5037 | 4.9485 |
| 9  | 6.9669 | 5.2717 |
| 10 | 5.8362 | 3.3266 |
| 11 | 8.3033 | 6.1509 |
| 12 | 6.826  | 4.2919 |
| 13 | 8.4011 | 5.9584 |
| 14 | 8.2178 | 5.9589 |
| 15 | 8.8622 | 6.562  |
| 16 | 8.7083 | 6.9817 |
| 17 | 8.9349 | 6.7308 |
| 18 | 7.8299 | 4.9411 |
| 19 | 9.0679 | 7.2564 |
| 20 | 8.2556 | 6.1789 |
| 21 | 8.8928 | 6.4629 |
| 22 | 8.776  | 6.3649 |
| 23 | 8.0649 | 5.9498 |
| 24 | 7.4843 | 4.6434 |
| 25 | 6.7491 | 4.8321 |
| 26 | 7.5355 | 5.9471 |
| 27 | 8.2559 | 6.0974 |
| 28 | 7.9818 | 6.53   |
| 29 | 7.9407 | 6.6211 |
| 30 | 8.5996 | 6.8351 |
| 31 | 8.5305 | 5.9095 |
| 32 | 8.7866 | 6.1121 |
| 33 | 7.7624 | 5.4544 |
| 34 | 8.5005 | 7.2721 |
| 35 | 8.0978 | 5.6448 |
| 36 | 9.8472 | 7.187  |
| 37 | 7.383  | 5.2556 |
| 38 | 8.9322 | 6.9455 |
| 39 | 7.9095 | 5.1377 |
| 40 | 8.5163 | 7.1734 |
| 41 | 5.4119 | 2.6914 |
| 42 | 8.3625 | 5.5764 |
| 43 | 6.4995 | 4.2651 |
| 44 | 8.4172 | 5.8984 |
| 45 | 9.7169 | 8.4222 |
| 46 | 8.8928 | 7.4912 |
| 47 | 8.6337 | 6.3122 |
| 48 | 8.0955 | 5.5808 |
| 49 | 8.5807 | 5.7758 |
| 50 | 8.7102 | 6.2163 |

<https://jitc.bmj.com>

|    |         |        |
|----|---------|--------|
| 1  |         |        |
| 2  | 8.9701  | 6.4082 |
| 3  | 6.7614  | 5.0717 |
| 4  | 7.667   | 5.9587 |
| 5  | 8.2209  | 6.7576 |
| 6  | 5.312   | 2.0437 |
| 7  | 8.0175  | 6.1727 |
| 8  | 9.1729  | 6.5149 |
| 9  | 7.5058  | 5.296  |
| 10 | 8.7479  | 6.2828 |
| 11 | 7.411   | 5.2694 |
| 12 | 10.3138 | 9.6245 |
| 13 | 7.0778  | 4.9533 |
| 14 | 8.0745  | 5.9805 |
| 15 | 7.1392  | 5.0884 |
| 16 | 7.361   | 4.9022 |
| 17 | 7.7404  | 5.4061 |
| 18 | 7.9549  | 6.0091 |
| 19 | 7.8782  | 6.2903 |
| 20 | 8.7333  | 6.5108 |
| 21 | 8.7898  | 6.0486 |
| 22 | 7.3361  | 5.8839 |
| 23 | 7.9626  | 6.3495 |
| 24 | 7.9773  | 5.6118 |
| 25 | 8.1152  | 5.9017 |
| 26 | 9.2124  | 7.1625 |
| 27 | 8.8991  | 7.1285 |
| 28 | 9.1952  | 7.5838 |
| 29 | 7.7528  | 5.5425 |
| 30 | 8.6246  | 6.531  |
| 31 | 9.4379  | 7.1876 |
| 32 | 8.6665  | 6.8052 |
| 33 | 7.7512  | 5.4534 |
| 34 | 9.4195  | 7.3781 |
| 35 | 8.2409  | 6.4509 |
| 36 | 8.4828  | 6.175  |
| 37 | 8.5033  | 6.4368 |
| 38 | 10.5685 | 8.1534 |
| 39 | 7.6333  | 5.6019 |
| 40 | 8.5477  | 6.5266 |
| 41 | 8.4446  | 6.0065 |
| 42 | 8.8716  | 6.2605 |
| 43 | 9.2834  | 7.0501 |
| 44 | 8.0837  | 5.5021 |
| 45 | 8.1094  | 5.9767 |
| 46 | 7.8898  | 6.1996 |
| 47 | 8.7632  | 6.0825 |
| 48 | 9.2294  | 6.9211 |
| 49 | 10.2819 | 8.2561 |
| 50 | 8.9082  | 6.5802 |

|    |         |        |
|----|---------|--------|
| 1  | 10.4305 | 7.791  |
| 2  | 6.848   | 5.789  |
| 3  | 8.8618  | 6.4394 |
| 4  | 10.6927 | 8.759  |
| 5  | 9.4884  | 7.2747 |
| 6  | 9.807   | 8.9088 |
| 7  | 8.094   | 5.856  |
| 8  | 8.0979  | 5.9173 |
| 9  | 7.9462  | 5.5934 |
| 10 | 9.8597  | 7.3994 |
| 11 | 10.1065 | 8.056  |
| 12 | 7.0799  | 4.6081 |
| 13 | 9.4185  | 7.25   |
| 14 | 7.0698  | 4.9782 |
| 15 | 8.7783  | 6.4023 |
| 16 | 9.9294  | 7.1149 |
| 17 | 9.9155  | 7.1935 |
| 18 | 9.6388  | 7.4168 |
| 19 | 8.7796  | 6.6525 |
| 20 | 7.636   | 5.6623 |
| 21 | 7.9796  | 5.3303 |
| 22 | 9.0276  | 6.936  |
| 23 | 8.9893  | 6.0545 |
| 24 | 9.5143  | 6.8774 |
| 25 | 8.2895  | 6.2036 |
| 26 | 7.7473  | 7.6055 |
| 27 | 9.4124  | 7.3806 |
| 28 | 7.8816  | 8.3173 |
| 29 | 5.1897  | 2.343  |
| 30 | 7.7095  | 5.3193 |
| 31 | 7.3073  | 5.47   |
| 32 | 9.968   | 7.1472 |
| 33 | 8.8824  | 7.0534 |
| 34 | 8.8211  | 6.6997 |
| 35 | 8.8367  | 6.858  |
| 36 | 9.651   | 7.0709 |
| 37 | 10.4882 | 8.6451 |
| 38 | 9.7812  | 8.3269 |
| 39 | 8.8397  | 6.6021 |
| 40 | 9.2011  | 7.0436 |
| 41 | 9.2312  | 6.9958 |
| 42 | 7.8521  | 5.6536 |
| 43 | 9.6005  | 7.2893 |
| 44 | 8.5985  | 6.3075 |
| 45 | 9.5757  | 6.9458 |
| 46 | 7.9981  | 5.5883 |
| 47 | 8.3339  | 5.8949 |
| 48 | 8.7748  | 6.585  |
| 49 | 7.3565  | 5.3758 |
| 50 |         |        |
| 51 |         |        |
| 52 |         |        |
| 53 |         |        |
| 54 |         |        |
| 55 |         |        |
| 56 |         |        |
| 57 |         |        |
| 58 |         |        |
| 59 |         |        |
| 60 |         |        |

<https://jitc.bmj.com>

|    |         |        |
|----|---------|--------|
| 1  |         |        |
| 2  | 10.4172 | 8.273  |
| 3  | 8.5977  | 6.2514 |
| 4  | 8.4747  | 6.6475 |
| 5  | 9.6505  | 7.5662 |
| 6  | 9.3126  | 7.0094 |
| 7  | 8.517   | 5.8391 |
| 8  | 8.3401  | 6.4833 |
| 9  | 10.1244 | 7.9661 |
| 10 | 8.6605  | 6.6327 |
| 11 | 7.7868  | 5.6775 |
| 12 | 8.1717  | 6.4028 |
| 13 | 9.9315  | 7.6456 |
| 14 | 7.5159  | 4.9768 |
| 15 | 9.1259  | 9.1931 |
| 16 | 9.3304  | 6.4145 |
| 17 | 9.1893  | 6.9799 |
| 18 | 9.829   | 7.1494 |
| 19 | 10.496  | 8.8024 |
| 20 | 10.1199 | 8.2226 |
| 21 | 9.8727  | 7.2176 |
| 22 | 9.4463  | 7.5436 |
| 23 | 7.9849  | 5.9539 |
| 24 | 8.7978  | 6.9722 |
| 25 | 8.5377  | 7.1769 |
| 26 | 8.0965  | 6.2081 |
| 27 | 8.6733  | 6.6811 |
| 28 | 9.741   | 8.2242 |
| 29 | 7.9365  | 5.7373 |
| 30 | 9.575   | 7.327  |
| 31 | 10.1817 | 8.0137 |
| 32 | 7.6306  | 5.6586 |
| 33 | 7.4089  | 5.3278 |
| 34 | 8.7819  | 7.1    |
| 35 | 9.9113  | 7.5674 |
| 36 | 9.329   | 6.9384 |
| 37 | 9.1315  | 6.8039 |
| 38 | 9.2272  | 7.3219 |
| 39 | 10.5624 | 7.8975 |
| 40 | 7.4147  | 5.7674 |
| 41 | 9.6293  | 7.7068 |
| 42 | 9.1099  | 7.4511 |
| 43 | 9.7907  | 8.3259 |
| 44 | 9.773   | 7.4774 |
| 45 | 10.6705 | 8.2868 |
| 46 | 10.7756 | 8.8641 |
| 47 | 10.6161 | 8.4426 |
| 48 | 10.0969 | 8.2022 |
| 49 | 9.0462  | 7.3886 |
| 50 | 9.4148  | 6.7368 |

|    |         |        |
|----|---------|--------|
| 1  | 10.0181 | 7.4803 |
| 2  | 8.868   | 6.5048 |
| 3  | 9.481   | 7.7513 |
| 4  | 10.1335 | 8.0197 |
| 5  | 10.3594 | 7.6881 |
| 6  | 7.8162  | 4.8757 |
| 7  | 8.8597  | 6.956  |
| 8  | 10.2236 | 8.4345 |
| 9  | 9.5117  | 7.4772 |
| 10 | 9.8298  | 7.7544 |
| 11 | 10.5609 | 8.1381 |
| 12 | 9.2166  | 7.2754 |
| 13 | 8.2088  | 6.2447 |
| 14 | 6.0827  | 3.8953 |
| 15 | 9.2203  | 7.0373 |
| 16 | 8.8862  | 6.6282 |
| 17 | 10.0429 | 7.1972 |
| 18 | 10.8339 | 8.2448 |
| 19 | 6.1865  | 2.5679 |
| 20 | 8.2785  | 6.0623 |
| 21 | 9.7072  | 7.7964 |
| 22 | 9.4844  | 7.6541 |
| 23 | 10.438  | 8.6894 |
| 24 | 9.4918  | 7.4303 |
| 25 | 9.0884  | 6.2828 |
| 26 | 10.0194 | 8.4575 |
| 27 | 11.6923 | 9.989  |
| 28 | 10.0747 | 8.4112 |
| 29 | 9.2443  | 6.9068 |
| 30 | 10.6883 | 8.1841 |
| 31 | 9.5071  | 7.7275 |
| 32 | 10.4978 | 8.2833 |
| 33 | 10.1841 | 7.7062 |
| 34 | 10.9426 | 9.2025 |
| 35 | 7.8037  | 6.6569 |
| 36 | 10.3606 | 8.3864 |
| 37 | 10.1458 | 8.24   |
| 38 | 8.1994  | 5.6361 |
| 39 | 9.6727  | 7.088  |
| 40 | 10.0987 | 8.176  |
| 41 | 10.9796 | 7.8817 |
| 42 | 10.4646 | 8.6108 |
| 43 | 10.1734 | 8.3299 |
| 44 | 9.8722  | 7.4793 |
| 45 | 7.842   | 6.3792 |
| 46 | 8.4095  | 5.8856 |
| 47 | 10.7359 | 8.1703 |
| 48 | 8.6764  | 6.8376 |
| 49 | 11.6511 | 9.3425 |
| 50 |         |        |
| 51 |         |        |
| 52 |         |        |
| 53 |         |        |
| 54 |         |        |
| 55 |         |        |
| 56 |         |        |
| 57 |         |        |
| 58 |         |        |
| 59 |         |        |
| 60 |         |        |

<https://jitc.bmj.com>

1  
2  
3  
4  
5  
6  
7  
8  
9  
10  
11  
12  
13  
14  
15  
16  
17  
18  
19  
20  
21  
22  
23  
24  
25  
26  
27  
28  
29  
30  
31  
32  
33  
34  
35  
36  
37  
38  
39  
40  
41  
42  
43  
44  
45  
46  
47  
48  
49  
50  
51  
52  
53  
54  
55  
56  
57  
58  
59  
60

|         |        |
|---------|--------|
| 10.0839 | 7.9319 |
| 10.5799 | 8.2236 |
| 9.3511  | 6.6153 |
| 9.6733  | 7.3798 |
| 10.9855 | 8.7147 |
| 11.6524 | 9.7272 |
| 10.2771 | 8.2742 |
| 9.035   | 6.1725 |

Confidential: For Review Only

**Supplementary Table 6: Proportion of CD103 presence in M1 hot, M1 interm, M1**

| Anonimized ID | CD103 score | CXCL9 score |
|---------------|-------------|-------------|
| LUAD-2011-365 | 3           | 1           |
| LUAD-2011-422 | 3           | 1           |
| LUAD-2011-455 | 3           | 1           |
| LUAD-2007-030 | 3           | 1           |
| LUAD-2011-379 | 3           | 1           |
| LUAD-2009-151 | 2           | 1           |
| LUAD-2010-258 | 2           | 1           |
| LUAD-2011-366 | 2           | 1           |
| LUAD-2007-017 | 2           | 1           |
| LUAD-2007-051 | 2           | 1           |
| LUAD-2008-080 | 2           | 1           |
| LUAD-2009-222 | 2           | 1           |
| LUAD-2010-259 | 2           | 1           |
| LUAD-2011-418 | 2           | 1           |
| LUAD-2011-452 | 2           | 1           |
| LUAD-2009-205 | 2           | 1           |
| LUAD-2010-261 | 2           | 1           |
| LUAD-2010-297 | 2           | 1           |
| LUAD-2007-021 | 2           | 1           |
| LUAD-2007-060 | 1           | 1           |
| LUAD-2008-071 | 1           | 1           |
| LUAD-2009-232 | 1           | 1           |
| LUAD-2010-250 | 1           | 1           |
| LUAD-2010-274 | 1           | 1           |
| LUAD-2010-343 | 1           | 1           |
| LUAD-2011-368 | 1           | 1           |
| LUAD-2007-001 | 1           | 1           |
| LUAD-2007-031 | 1           | 1           |
| LUAD-2007-041 | 1           | 1           |
| LUAD-2008-062 | 1           | 1           |
| LUAD-2008-067 | 1           | 1           |
| LUAD-2008-078 | 1           | 1           |
| LUAD-2008-089 | 1           | 1           |
| LUAD-2008-102 | 1           | 1           |
| LUAD-2008-115 | 1           | 1           |
| LUAD-2008-116 | 1           | 1           |
| LUAD-2008-125 | 1           | 1           |
| LUAD-2008-126 | 1           | 1           |
| LUAD-2008-127 | 1           | 1           |
| LUAD-2008-138 | 1           | 1           |
| LUAD-2009-148 | 1           | 1           |
| LUAD-2009-152 | 1           | 1           |
| LUAD-2009-160 | 1           | 1           |
| LUAD-2009-161 | 1           | 1           |
| LUAD-2009-165 | 1           | 1           |
| LUAD-2009-168 | 1           | 1           |

<https://jitc.bmj.com>



|    |               |   |   |
|----|---------------|---|---|
| 1  |               |   |   |
| 2  | LUAD-2009-177 | 1 | 1 |
| 3  | LUAD-2009-182 | 1 | 1 |
| 4  | LUAD-2009-192 | 1 | 1 |
| 5  | LUAD-2009-193 | 1 | 1 |
| 6  | LUAD-2009-197 | 1 | 1 |
| 7  | LUAD-2009-201 | 1 | 1 |
| 8  | LUAD-2009-210 | 1 | 1 |
| 9  | LUAD-2009-212 | 1 | 1 |
| 10 | LUAD-2009-214 | 1 | 1 |
| 11 | LUAD-2009-215 | 1 | 1 |
| 12 | LUAD-2009-223 | 1 | 1 |
| 13 | LUAD-2009-224 | 1 | 1 |
| 14 | LUAD-2010-237 | 1 | 1 |
| 15 | LUAD-2010-238 | 1 | 1 |
| 16 | LUAD-2010-243 | 1 | 1 |
| 17 | LUAD-2010-249 | 1 | 1 |
| 18 | LUAD-2010-254 | 1 | 1 |
| 19 | LUAD-2010-266 | 1 | 1 |
| 20 | LUAD-2010-268 | 1 | 1 |
| 21 | LUAD-2010-275 | 1 | 1 |
| 22 | LUAD-2010-295 | 1 | 1 |
| 23 | LUAD-2010-301 | 1 | 1 |
| 24 | LUAD-2010-309 | 1 | 1 |
| 25 | LUAD-2010-319 | 1 | 1 |
| 26 | LUAD-2010-326 | 1 | 1 |
| 27 | LUAD-2010-328 | 1 | 1 |
| 28 | LUAD-2010-329 | 1 | 1 |
| 29 | LUAD-2010-337 | 1 | 1 |
| 30 | LUAD-2010-339 | 1 | 1 |
| 31 | LUAD-2010-340 | 1 | 1 |
| 32 | LUAD-2010-342 | 1 | 1 |
| 33 | LUAD-2011-364 | 1 | 1 |
| 34 | LUAD-2011-369 | 1 | 1 |
| 35 | LUAD-2011-372 | 1 | 1 |
| 36 | LUAD-2011-380 | 1 | 1 |
| 37 | LUAD-2011-381 | 1 | 1 |
| 38 | LUAD-2011-382 | 1 | 1 |
| 39 | LUAD-2011-384 | 1 | 1 |
| 40 | LUAD-2011-393 | 1 | 1 |
| 41 | LUAD-2011-394 | 1 | 1 |
| 42 | LUAD-2011-397 | 1 | 1 |
| 43 | LUAD-2011-403 | 1 | 1 |
| 44 | LUAD-2011-405 | 1 | 1 |
| 45 | LUAD-2011-411 | 1 | 1 |
| 46 | LUAD-2011-412 | 1 | 1 |
| 47 | LUAD-2011-416 | 1 | 1 |
| 48 | LUAD-2011-445 | 1 | 1 |
| 49 | LUAD-2011-449 | 1 | 1 |
| 50 | LUAD-2011-456 | 1 | 1 |
| 51 |               |   |   |
| 52 |               |   |   |
| 53 |               |   |   |
| 54 |               |   |   |
| 55 |               |   |   |
| 56 |               |   |   |
| 57 |               |   |   |
| 58 |               |   |   |
| 59 |               |   |   |
| 60 |               |   |   |

<https://jitc.bmj.com>

|    |               |   |   |
|----|---------------|---|---|
| 1  |               |   |   |
| 2  | LUAD-2011-459 | 1 | 1 |
| 3  | LUAD-2007-010 | 3 | 2 |
| 4  | LUAD-2007-013 | 3 | 2 |
| 5  | LUAD-2007-018 | 3 | 2 |
| 6  | LUAD-2007-020 | 3 | 2 |
| 7  | LUAD-2007-052 | 3 | 2 |
| 8  | LUAD-2008-139 | 3 | 2 |
| 9  | LUAD-2009-155 | 3 | 2 |
| 10 | LUAD-2009-172 | 3 | 2 |
| 11 | LUAD-2009-176 | 3 | 2 |
| 12 | LUAD-2009-184 | 3 | 2 |
| 13 | LUAD-2010-255 | 3 | 2 |
| 14 | LUAD-2010-260 | 3 | 2 |
| 15 | LUAD-2010-278 | 3 | 2 |
| 16 | LUAD-2010-341 | 3 | 2 |
| 17 | LUAD-2011-344 | 3 | 2 |
| 18 | LUAD-2011-355 | 3 | 2 |
| 19 | LUAD-2011-402 | 3 | 2 |
| 20 | LUAD-2011-417 | 3 | 2 |
| 21 | LUAD-2011-419 | 3 | 2 |
| 22 | LUAD-2011-430 | 3 | 2 |
| 23 | LUAD-2011-457 | 3 | 2 |
| 24 | LUAD-2007-019 | 3 | 2 |
| 25 | LUAD-2008-087 | 3 | 2 |
| 26 | LUAD-2008-112 | 3 | 2 |
| 27 | LUAD-2009-187 | 3 | 2 |
| 28 | LUAD-2009-191 | 3 | 2 |
| 29 | LUAD-2011-370 | 3 | 2 |
| 30 | LUAD-2011-392 | 3 | 2 |
| 31 | LUAD-2011-436 | 3 | 2 |
| 32 | LUAD-2007-002 | 2 | 2 |
| 33 | LUAD-2008-066 | 2 | 2 |
| 34 | LUAD-2008-117 | 2 | 2 |
| 35 | LUAD-2009-175 | 2 | 2 |
| 36 | LUAD-2010-304 | 2 | 2 |
| 37 | LUAD-2010-311 | 2 | 2 |
| 38 | LUAD-2010-324 | 2 | 2 |
| 39 | LUAD-2011-363 | 2 | 2 |
| 40 | LUAD-2011-371 | 2 | 2 |
| 41 | LUAD-2011-426 | 2 | 2 |
| 42 | LUAD-2011-453 | 2 | 2 |
| 43 | LUAD-2011-458 | 2 | 2 |
| 44 | LUAD-2007-005 | 2 | 2 |
| 45 | LUAD-2007-022 | 2 | 2 |
| 46 | LUAD-2007-026 | 2 | 2 |
| 47 | LUAD-2007-028 | 2 | 2 |
| 48 | LUAD-2007-029 | 2 | 2 |
| 49 | LUAD-2007-042 | 2 | 2 |
| 50 | LUAD-2007-044 | 2 | 2 |
| 51 |               |   |   |
| 52 |               |   |   |
| 53 |               |   |   |
| 54 |               |   |   |
| 55 |               |   |   |
| 56 |               |   |   |
| 57 |               |   |   |
| 58 |               |   |   |
| 59 |               |   |   |
| 60 |               |   |   |

<https://jitc.bmj.com>

|    |               |   |   |
|----|---------------|---|---|
| 1  |               |   |   |
| 2  | LUAD-2007-053 | 2 | 2 |
| 3  | LUAD-2007-054 | 2 | 2 |
| 4  | LUAD-2007-056 | 2 | 2 |
| 5  | LUAD-2007-057 | 2 | 2 |
| 6  | LUAD-2007-059 | 2 | 2 |
| 7  | LUAD-2008-064 | 2 | 2 |
| 8  | LUAD-2008-069 | 2 | 2 |
| 9  | LUAD-2008-073 | 2 | 2 |
| 10 | LUAD-2008-074 | 2 | 2 |
| 11 | LUAD-2008-075 | 2 | 2 |
| 12 | LUAD-2008-099 | 2 | 2 |
| 13 | LUAD-2008-106 | 2 | 2 |
| 14 | LUAD-2008-109 | 2 | 2 |
| 15 | LUAD-2008-119 | 2 | 2 |
| 16 | LUAD-2008-123 | 2 | 2 |
| 17 | LUAD-2008-124 | 2 | 2 |
| 18 | LUAD-2008-141 | 2 | 2 |
| 19 | LUAD-2009-144 | 2 | 2 |
| 20 | LUAD-2009-154 | 2 | 2 |
| 21 | LUAD-2009-164 | 2 | 2 |
| 22 | LUAD-2009-173 | 2 | 2 |
| 23 | LUAD-2009-174 | 2 | 2 |
| 24 | LUAD-2009-213 | 2 | 2 |
| 25 | LUAD-2009-219 | 2 | 2 |
| 26 | LUAD-2010-244 | 2 | 2 |
| 27 | LUAD-2010-246 | 2 | 2 |
| 28 | LUAD-2010-269 | 2 | 2 |
| 29 | LUAD-2010-271 | 2 | 2 |
| 30 | LUAD-2010-298 | 2 | 2 |
| 31 | LUAD-2010-336 | 2 | 2 |
| 32 | LUAD-2011-356 | 2 | 2 |
| 33 | LUAD-2011-362 | 2 | 2 |
| 34 | LUAD-2011-378 | 2 | 2 |
| 35 | LUAD-2011-404 | 2 | 2 |
| 36 | LUAD-2011-410 | 2 | 2 |
| 37 | LUAD-2011-414 | 2 | 2 |
| 38 | LUAD-2011-423 | 2 | 2 |
| 39 | LUAD-2011-427 | 2 | 2 |
| 40 | LUAD-2011-440 | 2 | 2 |
| 41 | LUAD-2011-441 | 2 | 2 |
| 42 | LUAD-2011-443 | 2 | 2 |
| 43 | LUAD-2007-014 | 2 | 2 |
| 44 | LUAD-2007-015 | 2 | 2 |
| 45 | LUAD-2007-036 | 2 | 2 |
| 46 | LUAD-2007-045 | 2 | 2 |
| 47 | LUAD-2007-055 | 2 | 2 |
| 48 | LUAD-2008-081 | 2 | 2 |
| 49 | LUAD-2008-113 | 2 | 2 |
| 50 | LUAD-2009-149 | 2 | 2 |
| 51 |               |   |   |
| 52 |               |   |   |
| 53 |               |   |   |
| 54 |               |   |   |
| 55 |               |   |   |
| 56 |               |   |   |
| 57 |               |   |   |
| 58 |               |   |   |
| 59 |               |   |   |
| 60 |               |   |   |

<https://jitc.bmj.com>

|    |               |   |   |
|----|---------------|---|---|
| 1  |               |   |   |
| 2  | LUAD-2009-167 | 2 | 2 |
| 3  | LUAD-2009-198 | 2 | 2 |
| 4  | LUAD-2009-208 | 2 | 2 |
| 5  | LUAD-2009-226 | 2 | 2 |
| 6  | LUAD-2009-230 | 2 | 2 |
| 7  | LUAD-2010-242 | 2 | 2 |
| 8  | LUAD-2010-252 | 2 | 2 |
| 9  | LUAD-2010-270 | 2 | 2 |
| 10 | LUAD-2010-290 | 2 | 2 |
| 11 | LUAD-2010-292 | 2 | 2 |
| 12 | LUAD-2010-302 | 2 | 2 |
| 13 | LUAD-2010-305 | 2 | 2 |
| 14 | LUAD-2010-333 | 2 | 2 |
| 15 | LUAD-2011-350 | 2 | 2 |
| 16 | LUAD-2011-351 | 2 | 2 |
| 17 | LUAD-2011-357 | 2 | 2 |
| 18 | LUAD-2011-361 | 2 | 2 |
| 19 | LUAD-2011-373 | 2 | 2 |
| 20 | LUAD-2011-398 | 2 | 2 |
| 21 | LUAD-2011-421 | 2 | 2 |
| 22 | LUAD-2011-433 | 2 | 2 |
| 23 | LUAD-2007-008 | 2 | 2 |
| 24 | LUAD-2008-128 | 2 | 2 |
| 25 | LUAD-2009-153 | 2 | 2 |
| 26 | LUAD-2009-171 | 2 | 2 |
| 27 | LUAD-2009-203 | 2 | 2 |
| 28 | LUAD-2010-253 | 2 | 2 |
| 29 | LUAD-2011-439 | 2 | 2 |
| 30 | LUAD-2011-460 | 2 | 2 |
| 31 | LUAD-2007-007 | 1 | 2 |
| 32 | LUAD-2007-011 | 1 | 2 |
| 33 | LUAD-2007-016 | 1 | 2 |
| 34 | LUAD-2007-027 | 1 | 2 |
| 35 | LUAD-2007-034 | 1 | 2 |
| 36 | LUAD-2007-038 | 1 | 2 |
| 37 | LUAD-2007-039 | 1 | 2 |
| 38 | LUAD-2007-046 | 1 | 2 |
| 39 | LUAD-2007-047 | 1 | 2 |
| 40 | LUAD-2008-065 | 1 | 2 |
| 41 | LUAD-2008-079 | 1 | 2 |
| 42 | LUAD-2008-083 | 1 | 2 |
| 43 | LUAD-2008-084 | 1 | 2 |
| 44 | LUAD-2008-094 | 1 | 2 |
| 45 | LUAD-2008-097 | 1 | 2 |
| 46 | LUAD-2008-105 | 1 | 2 |
| 47 | LUAD-2008-133 | 1 | 2 |
| 48 | LUAD-2008-136 | 1 | 2 |
| 49 | LUAD-2009-169 | 1 | 2 |
| 50 | LUAD-2009-189 | 1 | 2 |
| 51 |               |   |   |
| 52 |               |   |   |
| 53 |               |   |   |
| 54 |               |   |   |
| 55 |               |   |   |
| 56 |               |   |   |
| 57 |               |   |   |
| 58 |               |   |   |
| 59 |               |   |   |
| 60 |               |   |   |

<https://jitc.bmj.com>

|    |               |   |   |
|----|---------------|---|---|
| 1  |               |   |   |
| 2  | LUAD-2009-194 | 1 | 2 |
| 3  | LUAD-2009-218 | 1 | 2 |
| 4  | LUAD-2009-227 | 1 | 2 |
| 5  | LUAD-2010-247 | 1 | 2 |
| 6  | LUAD-2010-280 | 1 | 2 |
| 7  | LUAD-2010-288 | 1 | 2 |
| 8  | LUAD-2010-294 | 1 | 2 |
| 9  | LUAD-2010-307 | 1 | 2 |
| 10 | LUAD-2010-308 | 1 | 2 |
| 11 | LUAD-2010-331 | 1 | 2 |
| 12 | LUAD-2011-345 | 1 | 2 |
| 13 | LUAD-2011-376 | 1 | 2 |
| 14 | LUAD-2011-377 | 1 | 2 |
| 15 | LUAD-2011-383 | 1 | 2 |
| 16 | LUAD-2011-408 | 1 | 2 |
| 17 | LUAD-2011-420 | 1 | 2 |
| 18 | LUAD-2011-451 | 1 | 2 |
| 19 | LUAD-2007-003 | 1 | 2 |
| 20 | LUAD-2007-004 | 1 | 2 |
| 21 | LUAD-2007-006 | 1 | 2 |
| 22 | LUAD-2007-009 | 1 | 2 |
| 23 | LUAD-2007-012 | 1 | 2 |
| 24 | LUAD-2007-024 | 1 | 2 |
| 25 | LUAD-2007-025 | 1 | 2 |
| 26 | LUAD-2007-035 | 1 | 2 |
| 27 | LUAD-2007-037 | 1 | 2 |
| 28 | LUAD-2007-040 | 1 | 2 |
| 29 | LUAD-2007-048 | 1 | 2 |
| 30 | LUAD-2007-049 | 1 | 2 |
| 31 | LUAD-2007-058 | 1 | 2 |
| 32 | LUAD-2008-061 | 1 | 2 |
| 33 | LUAD-2008-063 | 1 | 2 |
| 34 | LUAD-2008-070 | 1 | 2 |
| 35 | LUAD-2008-072 | 1 | 2 |
| 36 | LUAD-2008-077 | 1 | 2 |
| 37 | LUAD-2008-082 | 1 | 2 |
| 38 | LUAD-2008-085 | 1 | 2 |
| 39 | LUAD-2008-088 | 1 | 2 |
| 40 | LUAD-2008-090 | 1 | 2 |
| 41 | LUAD-2008-091 | 1 | 2 |
| 42 | LUAD-2008-092 | 1 | 2 |
| 43 | LUAD-2008-093 | 1 | 2 |
| 44 | LUAD-2008-095 | 1 | 2 |
| 45 | LUAD-2008-096 | 1 | 2 |
| 46 | LUAD-2008-098 | 1 | 2 |
| 47 | LUAD-2008-101 | 1 | 2 |
| 48 | LUAD-2008-103 | 1 | 2 |
| 49 | LUAD-2008-104 | 1 | 2 |
| 50 | LUAD-2008-107 | 1 | 2 |
| 51 |               |   |   |
| 52 |               |   |   |
| 53 |               |   |   |
| 54 |               |   |   |
| 55 |               |   |   |
| 56 |               |   |   |
| 57 |               |   |   |
| 58 |               |   |   |
| 59 |               |   |   |
| 60 |               |   |   |

<https://jitc.bmj.com>

|    |               |   |   |
|----|---------------|---|---|
| 1  |               |   |   |
| 2  | LUAD-2008-111 | 1 | 2 |
| 3  | LUAD-2008-114 | 1 | 2 |
| 4  | LUAD-2008-120 | 1 | 2 |
| 5  | LUAD-2008-121 | 1 | 2 |
| 6  | LUAD-2008-130 | 1 | 2 |
| 7  | LUAD-2008-132 | 1 | 2 |
| 8  | LUAD-2008-135 | 1 | 2 |
| 9  | LUAD-2008-140 | 1 | 2 |
| 10 | LUAD-2009-145 | 1 | 2 |
| 11 | LUAD-2009-147 | 1 | 2 |
| 12 | LUAD-2009-156 | 1 | 2 |
| 13 | LUAD-2009-157 | 1 | 2 |
| 14 | LUAD-2009-162 | 1 | 2 |
| 15 | LUAD-2009-163 | 1 | 2 |
| 16 | LUAD-2009-166 | 1 | 2 |
| 17 | LUAD-2009-178 | 1 | 2 |
| 18 | LUAD-2009-179 | 1 | 2 |
| 19 | LUAD-2009-180 | 1 | 2 |
| 20 | LUAD-2009-181 | 1 | 2 |
| 21 | LUAD-2009-183 | 1 | 2 |
| 22 | LUAD-2009-195 | 1 | 2 |
| 23 | LUAD-2009-196 | 1 | 2 |
| 24 | LUAD-2009-199 | 1 | 2 |
| 25 | LUAD-2009-200 | 1 | 2 |
| 26 | LUAD-2009-202 | 1 | 2 |
| 27 | LUAD-2009-204 | 1 | 2 |
| 28 | LUAD-2009-217 | 1 | 2 |
| 29 | LUAD-2009-225 | 1 | 2 |
| 30 | LUAD-2009-229 | 1 | 2 |
| 31 | LUAD-2009-231 | 1 | 2 |
| 32 | LUAD-2009-233 | 1 | 2 |
| 33 | LUAD-2009-234 | 1 | 2 |
| 34 | LUAD-2009-235 | 1 | 2 |
| 35 | LUAD-2010-239 | 1 | 2 |
| 36 | LUAD-2010-240 | 1 | 2 |
| 37 | LUAD-2010-248 | 1 | 2 |
| 38 | LUAD-2010-256 | 1 | 2 |
| 39 | LUAD-2010-257 | 1 | 2 |
| 40 | LUAD-2010-262 | 1 | 2 |
| 41 | LUAD-2010-263 | 1 | 2 |
| 42 | LUAD-2010-267 | 1 | 2 |
| 43 | LUAD-2010-272 | 1 | 2 |
| 44 | LUAD-2010-276 | 1 | 2 |
| 45 | LUAD-2010-277 | 1 | 2 |
| 46 | LUAD-2010-281 | 1 | 2 |
| 47 | LUAD-2010-283 | 1 | 2 |
| 48 | LUAD-2010-284 | 1 | 2 |
| 49 | LUAD-2010-285 | 1 | 2 |
| 50 | LUAD-2010-286 | 1 | 2 |
| 51 |               |   |   |
| 52 |               |   |   |
| 53 |               |   |   |
| 54 |               |   |   |
| 55 |               |   |   |
| 56 |               |   |   |
| 57 |               |   |   |
| 58 |               |   |   |
| 59 |               |   |   |
| 60 |               |   |   |

<https://jitc.bmj.com>

|    |               |   |   |
|----|---------------|---|---|
| 1  |               |   |   |
| 2  | LUAD-2010-291 | 1 | 2 |
| 3  | LUAD-2010-293 | 1 | 2 |
| 4  | LUAD-2010-300 | 1 | 2 |
| 5  | LUAD-2010-306 | 1 | 2 |
| 6  | LUAD-2010-310 | 1 | 2 |
| 7  | LUAD-2010-316 | 1 | 2 |
| 8  | LUAD-2010-317 | 1 | 2 |
| 9  | LUAD-2010-318 | 1 | 2 |
| 10 | LUAD-2010-321 | 1 | 2 |
| 11 | LUAD-2010-325 | 1 | 2 |
| 12 | LUAD-2010-330 | 1 | 2 |
| 13 | LUAD-2010-332 | 1 | 2 |
| 14 | LUAD-2010-335 | 1 | 2 |
| 15 | LUAD-2010-338 | 1 | 2 |
| 16 | LUAD-2011-348 | 1 | 2 |
| 17 | LUAD-2011-349 | 1 | 2 |
| 18 | LUAD-2011-352 | 1 | 2 |
| 19 | LUAD-2011-353 | 1 | 2 |
| 20 | LUAD-2011-354 | 1 | 2 |
| 21 | LUAD-2011-358 | 1 | 2 |
| 22 | LUAD-2011-374 | 1 | 2 |
| 23 | LUAD-2011-375 | 1 | 2 |
| 24 | LUAD-2011-385 | 1 | 2 |
| 25 | LUAD-2011-387 | 1 | 2 |
| 26 | LUAD-2011-388 | 1 | 2 |
| 27 | LUAD-2011-399 | 1 | 2 |
| 28 | LUAD-2011-401 | 1 | 2 |
| 29 | LUAD-2011-409 | 1 | 2 |
| 30 | LUAD-2011-413 | 1 | 2 |
| 31 | LUAD-2011-415 | 1 | 2 |
| 32 | LUAD-2011-428 | 1 | 2 |
| 33 | LUAD-2011-429 | 1 | 2 |
| 34 | LUAD-2011-434 | 1 | 2 |
| 35 | LUAD-2011-435 | 1 | 2 |
| 36 | LUAD-2011-446 | 1 | 2 |
| 37 | LUAD-2011-447 | 1 | 2 |
| 38 | LUAD-2008-118 | 3 | 3 |
| 39 | LUAD-2008-137 | 3 | 3 |
| 40 | LUAD-2009-159 | 3 | 3 |
| 41 | LUAD-2009-206 | 3 | 3 |
| 42 | LUAD-2009-221 | 3 | 3 |
| 43 | LUAD-2010-265 | 3 | 3 |
| 44 | LUAD-2010-273 | 3 | 3 |
| 45 | LUAD-2010-287 | 3 | 3 |
| 46 | LUAD-2010-315 | 3 | 3 |
| 47 | LUAD-2011-367 | 3 | 3 |
| 48 | LUAD-2011-424 | 3 | 3 |
| 49 | LUAD-2011-431 | 3 | 3 |
| 50 | LUAD-2011-448 | 3 | 3 |
| 51 |               |   |   |
| 52 |               |   |   |
| 53 |               |   |   |
| 54 |               |   |   |
| 55 |               |   |   |
| 56 |               |   |   |
| 57 |               |   |   |
| 58 |               |   |   |
| 59 |               |   |   |
| 60 |               |   |   |

<https://jitc.bmj.com>

1  
2  
3  
4  
5  
6  
7  
8  
9  
10  
11  
12  
13  
14  
15  
16  
17  
18  
19  
20  
21  
22  
23  
24  
25  
26  
27  
28  
29  
30  
31  
32  
33  
34  
35  
36  
37  
38  
39  
40  
41  
42  
43  
44  
45  
46  
47  
48  
49  
50  
51  
52  
53  
54  
55  
56  
57  
58  
59  
60

|               |   |   |
|---------------|---|---|
| LUAD-2011-454 | 3 | 3 |
| LUAD-2010-289 | 3 | 3 |
| LUAD-2010-320 | 3 | 3 |
| LUAD-2010-323 | 3 | 3 |
| LUAD-2011-395 | 3 | 3 |
| LUAD-2007-023 | 3 | 3 |
| LUAD-2010-296 | 2 | 3 |
| LUAD-2010-334 | 2 | 3 |
| LUAD-2011-400 | 2 | 3 |
| LUAD-2009-146 | 2 | 3 |
| LUAD-2010-279 | 2 | 3 |
| LUAD-2011-346 | 2 | 3 |
| LUAD-2011-391 | 2 | 3 |
| LUAD-2011-406 | 2 | 3 |
| LUAD-2011-442 | 2 | 3 |
| LUAD-2008-110 | 2 | 3 |
| LUAD-2008-129 | 2 | 3 |
| LUAD-2008-134 | 2 | 3 |
| LUAD-2009-209 | 2 | 3 |
| LUAD-2010-251 | 2 | 3 |
| LUAD-2010-303 | 2 | 3 |
| LUAD-2010-314 | 2 | 3 |
| LUAD-2010-327 | 2 | 3 |
| LUAD-2011-386 | 2 | 3 |
| LUAD-2011-390 | 2 | 3 |
| LUAD-2009-211 | 2 | 3 |
| LUAD-2011-407 | 2 | 3 |
| LUAD-2007-050 | 1 | 3 |
| LUAD-2008-108 | 1 | 3 |
| LUAD-2009-188 | 1 | 3 |
| LUAD-2010-241 | 1 | 3 |
| LUAD-2010-264 | 1 | 3 |
| LUAD-2010-299 | 1 | 3 |
| LUAD-2010-313 | 1 | 3 |
| LUAD-2010-322 | 1 | 3 |
| LUAD-2007-033 | 1 | 3 |
| LUAD-2008-068 | 1 | 3 |
| LUAD-2008-086 | 1 | 3 |
| LUAD-2008-122 | 1 | 3 |
| LUAD-2009-150 | 1 | 3 |
| LUAD-2009-186 | 1 | 3 |
| LUAD-2009-190 | 1 | 3 |
| LUAD-2009-220 | 1 | 3 |

<https://jitc.bmj.com>



1  
2  
3  
4  
5  
6  
7  
8  
9  
10  
11  
12  
13  
14  
15  
16  
17  
18  
19  
20  
21  
22  
23  
24  
25  
26  
27  
28  
29  
30  
31  
32  
33  
34  
35  
36  
37  
38  
39  
40  
41  
42  
43  
44  
45  
46  
47  
48  
49  
50  
51  
52  
53  
54  
55  
56  
57  
58  
59  
60

**cold tumours**

Confidential: For Review Only

1  
2  
3  
4  
5  
6  
7  
8  
9  
10  
11  
12  
13  
14  
15  
16  
17  
18  
19  
20  
21  
22  
23  
24  
25  
26  
27  
28  
29  
30  
31  
32  
33  
34  
35  
36  
37  
38  
39  
40  
41  
42  
43  
44  
45  
46  
47  
48  
49  
50  
51  
52  
53  
54  
55  
56  
57  
58  
59  
60

|       | Factor   | N(%)     | Mean OS (Months) | 95% CI       | P value      |
|-------|----------|----------|------------------|--------------|--------------|
| CD103 | Low      | 72 (57)  | 1861 (61.1)      | 1658 to 2063 | 0.230        |
|       | Moderate | 39 (31)  | 2017 (66.3)      | 1770 to 2263 |              |
|       | High     | 15 (12)  | 2213 (72.8)      | 1876 to 2549 |              |
|       | Overall  | 126      | 1974 (64.9)      | 1829 to 2118 |              |
| CD103 | Low      | 72 (83)  | 1861 (61.1)      | 1658 to 2063 | 0.109        |
|       | High     | 15 ( 17) | 2213 (72.8)      | 1876 to 2549 |              |
|       | Overall  | 87       | 1943 (63.9)      | 1766 to 2119 |              |
| CD8   | Low      | 60 (48)  | 1807 (59.4)      | 1581 to 2034 | 0.192        |
|       | Moderate | 46 ( 36) | 2076 (68.3)      | 1857 to 2295 |              |
|       | High     | 20 (16)  | 2028 (66.7)      | 1692 to 2365 |              |
|       | Overall  | 126      | 1942 (63.8)      | 1766 to 2119 |              |
| CD8   | Low      | 60 (75)  | 1807 (59.4)      | 1581 to 2034 | 0.293        |
|       | High     | 20 (25)  | 2028 (66.7)      | 1692 to 2365 |              |
|       | Overall  | 80       | 1878 (61.7)      | 1688 to 2068 |              |
| CXCL9 | Low      | 32 ( 25) | 1600 (52.6)      | 1281 to 1918 | <b>0.028</b> |
|       | Moderate | 83 (65)  | 1981 (65.1)      | 1803 to 2158 |              |
|       | High     | 13 (10)  | 2040 (67.1)      | 1738 to 2342 |              |
|       | Overall  | 128      | 1961 (64.4)      | 1817 to 2105 |              |
| CXCL9 | Low      | 32 (71)  | 1600 (52.6)      | 1281 to 1918 | <b>0.01</b>  |
|       | High     | 13 ( 29) | 2040 (67.1)      | 1738 to 2342 |              |
|       | Overall  | 45       | 1848 (60.8)      | 1603 to 2093 |              |
|       | Male     | 60 (47)  | 1883 (60.8)      | 1662 to 2102 | 0.277        |

Univariate :

|         |         |         |        |              |                            |
|---------|---------|---------|--------|--------------|----------------------------|
| Gender  | Male    | 60 (47) | (61.9) | 1862 to 2103 | 0.377                      |
|         | Female  | 68 (53) | (65.9) | 1817 to 2193 |                            |
|         | Overall | 128     |        |              |                            |
| Age     | <65     | 57 (45) | (63.2) | 1708 to 2136 | 0.783                      |
|         | >65     | 71 (55) | (64.9) | 1783 to 2167 |                            |
|         | Overall | 128     | (64.5) | 1817 to 2105 |                            |
| Staging |         | 119     | (64.9) | 1828 to 2124 | <b>8.9x10<sup>-8</sup></b> |

1  
2 analysis using cancer specific death  
3  
4  
5  
6  
7  
8  
9  
10  
11  
12  
13  
14  
15  
16  
17  
18  
19  
20  
21  
22  
23  
24  
25  
26  
27  
28  
29  
30  
31  
32  
33  
34  
35  
36  
37  
38  
39  
40  
41  
42  
43  
44  
45  
46  
47  
48  
49  
50  
51  
52  
53  
54  
55  
56  
57  
58  
59  
60

Confidential: For Review Only

1  
2  
3  
4  
5  
6  
7  
8  
9  
10  
11  
12  
13  
14  
15  
16  
17  
18  
19  
20  
21  
22  
23  
24  
25  
26  
27  
28  
29  
30  
31  
32  
33  
34  
35  
36  
37  
38  
39  
40  
41  
42  
43  
44  
45  
46  
47  
48  
49  
50  
51  
52  
53  
54  
55  
56  
57  
58  
59  
60

| Variable | HR    | 95% CI            | p-value      | Multivariate analysis using cancer specific death<br>(Without staging: N=124) |
|----------|-------|-------------------|--------------|-------------------------------------------------------------------------------|
| CD103    | 0.863 | 0.643 to<br>1.171 | 0.352        |                                                                               |
| CD8      | 1,023 | 0.749 to<br>1.399 | 0.885        |                                                                               |
| CXCL9    | 0.713 | 0.512 to<br>0.994 | <b>0.046</b> |                                                                               |
| Age      | 0.950 | 0.665 to<br>1.358 | 0.780        |                                                                               |
| Gender   | 0.919 | 0.654 to<br>1.314 | 0.643        |                                                                               |
