# Supplementary material for: M1hot tumor-associated macrophages boost tissue-resident memory T cells infiltration and survival in human lung cancer
Source: PubMed Central journal article supplement (PMC7375465; doi:10.1136/jitc-2020-000778), 2020-07-21

**Figure S5.**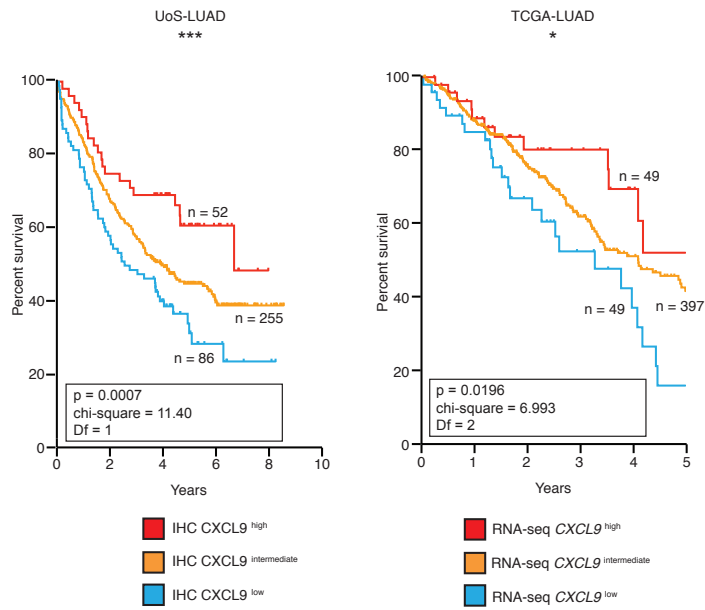

Supplement: jitc-2020-000778supp004.pdf [file jitc-2020-000778supp004.pdf]
